# Supplementary material for: Integrated MicroRNA Expression Profile Reveals Dysregulated miR-20a-5p and miR-200a-3p in Liver Fibrosis
Source: PubMed Central journal article supplement (PMC8218919; doi:10.1155/2021/9583932), 2021-06-08
Supplement: 9583932.f3.pdf [file 9583932.f3.pdf]

| Category         | Term                                                                            | Count | %        | PValue   | Genes     | List Total | Pop Hits | Pop Total | Fold Enrich | Bonferroni | Benjamini | FDR      |
|------------------|---------------------------------------------------------------------------------|-------|----------|----------|-----------|------------|----------|-----------|-------------|------------|-----------|----------|
| GOTERM BP DIRECT | GO:0006351--transcription, DNA-templated                                        | 205   | 15.29851 | 1.77E-08 | BBX, ROB  | 1214       | 1955     | 16792     | 1.45041     | 7.34E-05   | 7.34E-05  | 3.30E-05 |
| GOTERM BP DIRECT | GO:0006977--DNA damage response, signal transduction by p53 class mediator      | 20    | 1.492537 | 3.87E-08 | E2F1, RBL | 1214       | 62       | 16792     | 4.461923    | 1.60E-04   | 8.02E-05  | 7.21E-05 |
| GOTERM BP DIRECT | GO:0007179--transforming growth factor beta receptor signaling pathway          | 23    | 1.716418 | 4.47E-07 | PARD3, PI | 1214       | 92       | 16792     | 3.45799     | 0.001851   | 6.17E-04  | 8.34E-04 |
| GOTERM BP DIRECT | GO:0045893--positive regulation of transcription, DNA-templated                 | 68    | 5.074627 | 1.80E-06 | E2F1, CHU | 1214       | 515      | 16792     | 1.826356    | 0.007423   | 0.001861  | 0.003353 |
| GOTERM BP DIRECT | GO:0000086--G2M transition of mitotic cell cycle                                | 27    | 2.014925 | 4.74E-06 | CEP72, PP | 1214       | 137      | 16792     | 2.726007    | 0.019473   | 0.003925  | 0.008848 |
| GOTERM BP DIRECT | GO:0006468--protein phosphorylation                                             | 60    | 4.477612 | 8.78E-06 | CDK19, N  | 1214       | 456      | 16792     | 1.819995    | 0.035762   | 0.006051  | 0.016385 |
| GOTERM BP DIRECT | GO:1900740--positive regulation of protein insertion into mitochondrial membra  | 11    | 0.820896 | 2.94E-05 | E2F1, YW  | 1214       | 30       | 16792     | 5.071719    | 0.114742   | 0.01276   | 0.054824 |
| GOTERM BP DIRECT | GO:0035194--posttranscriptional gene silencing by RNA                           | 6     | 0.447761 | 3.62E-05 | AGO1, AG  | 1214       | 7        | 16792     | 11.85597    | 0.13946    | 0.018599  | 0.067559 |
| GOTERM BP DIRECT | GO:0035280--miRNA loading onto RISC involved in gene silencing by miRNA         | 6     | 0.447761 | 3.62E-05 | DICER1, I | 1214       | 7        | 16792     | 11.85597    | 0.13946    | 0.018599  | 0.067559 |
| GOTERM BP DIRECT | GO:0000122--negative regulation of transcription from RNA polymerase II prom    | 82    | 6.119403 | 4.16E-05 | BACH1, E  | 1214       | 720      | 16792     | 1.575307    | 0.158416   | 0.018981  | 0.077574 |
| GOTERM BP DIRECT | GO:0035278--miRNA mediated inhibition of translation                            | 7     | 0.522388 | 8.87E-05 | AGO1, AG  | 1214       | 12       | 16792     | 9.068644    | 0.30779    | 0.036118  | 0.165388 |
| GOTERM BP DIRECT | GO:0071456--cellular response to hypoxia                                        | 19    | 1.41791  | 1.56E-04 | E2F1, PPA | 1214       | 96       | 16792     | 2.737576    | 0.476229   | 0.057096  | 0.290566 |
| GOTERM BP DIRECT | GO:0051726--regulation of cell cycle                                            | 22    | 1.641791 | 2.07E-04 | CDK19, E  | 1214       | 124      | 16792     | 2.454058    | 0.57677    | 0.069146  | 0.386145 |
| GOTERM BP DIRECT | GO:0075733--intracellular transport of virus                                    | 13    | 0.970149 | 2.17E-04 | NUP98, TS | 1214       | 51       | 16792     | 3.525794    | 0.592633   | 0.066748  | 0.403266 |
| GOTERM BP DIRECT | GO:0045892--negative regulation of transcription, RNA-templated                 | 4     | 0.420985 | 2.17E-04 | E2F1, PPA | 1214       | 499      | 16792     | 1.635442    | 0.592599   | 0.062185  | 0.403625 |
| GOTERM BP DIRECT | GO:0045944--positive regulation of transcription from RNA polymerase II prom    | 101   | 7.537313 | 2.54E-04 | MORF4L2   | 1214       | 981      | 16792     | 1.424086    | 0.651896   | 0.067933  | 0.473696 |
| GOTERM BP DIRECT | GO:0001701--in utero embryonic development                                      | 28    | 2.089552 | 4.30E-04 | STIL, GJA | 1214       | 187      | 16792     | 2.071096    | 0.831884   | 0.105458  | 0.799111 |
| GOTERM BP DIRECT | GO:0016032--viral process                                                       | 39    | 2.910448 | 4.80E-04 | CCL1, CR  | 1214       | 299      | 16792     | 1.804169    | 0.863455   | 0.110525  | 0.891911 |
| GOTERM BP DIRECT | GO:0006974--cellular response to DNA damage stimulus                            | 30    | 2.238866 | 4.86E-04 | ARMT1, X  | 1214       | 208      | 16792     | 1.994994    | 0.866494   | 0.105837  | 0.901948 |
| GOTERM BP DIRECT | GO:0030512--negative regulation of transforming growth factor beta receptor sig | 14    | 1.044776 | 5.61E-04 | GLG1, W   | 1214       | 64       | 16792     | 3.025741    | 0.902268   | 0.115202  | 1.040936 |
| GOTERM BP DIRECT | GO:0061418--regulation of transcription from RNA polymerase II promoter in re   | 9     | 0.671642 | 6.10E-04 | BACH1, U  | 1214       | 28       | 16792     | 4.445897    | 0.920304   | 0.118805  | 1.131733 |
| GOTERM BP DIRECT | GO:0003181--atrioventricular valve morphogenesis                                | 6     | 0.447761 | 6.23E-04 | BMP2, TG  | 1214       | 11       | 16792     | 7.544706    | 0.924613   | 0.115825  | 1.156458 |
| GOTERM BP DIRECT | GO:0003148--outflow tract septum morphogenesis                                  | 8     | 0.597015 | 8.84E-04 | GATA6, S  | 1214       | 23       | 16792     | 4.811117    | 0.97441    | 0.153476  | 1.635828 |
| GOTERM BP DIRECT | GO:0016236--macroautophagy                                                      | 15    | 1.194103 | 9.77E-04 | LAMTOR1   | 1214       | 76       | 16792     | 2.739992    | 0.982599   | 0.161499  | 1.806369 |
| GOTERM BP DIRECT | GO:0030308--negative regulation of cell growth                                  | 20    | 1.492537 | 0.01062  | CDLBD2    | 1214       | 12       | 16792     | 2.286274    | 0.987776   | 0.167661  | 1.962273 |
| GOTERM BP DIRECT | GO:0007050--cell cycle arrest                                                   | 22    | 1.641791 | 0.01198  | WNT10B    | 1214       | 141      | 16792     | 2.158178    | 0.99307    | 0.180349  | 2.123234 |
| GOTERM BP DIRECT | GO:0018107--peptidyl-threonine phosphorylation                                  | 10    | 0.746269 | 0.01251  | ACVR1B    | 1214       | 38       | 16792     | 3.63999     | 0.994419   | 0.180904  | 2.307534 |
| GOTERM BP DIRECT | GO:0048147--negative regulation of fibroblast proliferation                     | 9     | 0.671642 | 0.01275  | BAX, TR1  | 1214       | 31       | 16792     | 4.01573     | 0.994558   | 0.177927  | 2.35218  |
| GOTERM BP DIRECT | GO:0035556--intracellular signal transduction                                   | 47    | 3.507463 | 0.01362  | ZBTB33, I | 1214       | 403      | 16792     | 1.613157    | 0.996492   | 0.182806  | 2.511372 |
| GOTERM BP DIRECT | GO:0046777--protein autophosphorylation                                         | 25    | 1.865672 | 0.01415  | MAPKAP1   | 1214       | 172      | 16792     | 2.010459    | 0.997173   | 0.183206  | 2.60611  |
| GOTERM BP DIRECT | GO:0090625--mRNA cleavage involved in gene silencing by siRNA                   | 4     | 0.298507 | 0.01423  | AGO1, AG  | 1214       | 4        | 16792     | 13.83196    | 0.997271   | 0.178644  | 2.621562 |
| GOTERM BP DIRECT | GO:0035196--production of miRNAs involved in gene silencing by miRNA            | 5     | 0.373134 | 0.01498  | DICER1, I | 1214       | 8        | 16792     | 6.644975    | 0.998      | 0.181654  | 2.757564 |
| GOTERM BP DIRECT | GO:0048015--phosphatidylinositol-mediated signaling                             | 18    | 1.343284 | 0.01503  | NRG4, FG  | 1214       | 106      | 16792     | 2.348823    | 0.998046   | 0.171708  | 2.76772  |
| GOTERM BP DIRECT | GO:0046686--response to cadmium ion                                             | 8     | 0.597015 | 0.01526  | CDKN1B    | 1214       | 25       | 16792     | 4.426227    | 0.998217   | 0.174535  | 2.809725 |
| GOTERM BP DIRECT | GO:0060389--pathway-restricted SMAD protein phosphorylation                     | 6     | 0.447761 | 0.01537  | BMP2, SM  | 1214       | 13       | 16792     | 6.383982    | 0.998298   | 0.171001  | 2.828271 |
| GOTERM BP DIRECT | GO:0031054--pre-miRNA processing                                                | 6     | 0.447761 | 0.01537  | DICER1, I | 1214       | 13       | 16792     | 6.383982    | 0.998298   | 0.171001  | 2.828271 |
| GOTERM BP DIRECT | GO:0007507--heart development                                                   | 26    | 1.940299 | 0.0154   | PPAR, B   | 1214       | 183      | 16792     | 1.965197    | 0.998324   | 0.166905  | 2.834845 |
| GOTERM BP DIRECT | GO:0006357--regulation of transcription from RNA polymerase II promoter         | 50    | 3.731343 | 0.01716  | HPAR, F   | 1214       | 441      | 16792     | 1.568249    | 0.999192   | 0.179456  | 3.153088 |
| GOTERM BP DIRECT | GO:0098609--cell-cell adhesion                                                  | 34    | 2.537313 | 0.02215  | PSP90AB   | 1214       | 271      | 16792     | 1.735375    | 0.999898   | 0.219994  | 3.051989 |
| GOTERM BP DIRECT | GO:0014911--positive regulation of smooth muscle cell migration                 | 7     | 0.522388 | 0.02253  | NRP1, P   | 1214       | 20       | 16792     | 4.841186    | 0.999913   | 0.218148  | 4.120453 |
| GOTERM BP DIRECT | GO:0016567--protein ubiquitination                                              | 42    | 3.134328 | 0.02389  | BACH1, X  | 1214       | 359      | 16792     | 1.618224    | 0.999951   | 0.224507  | 4.363719 |
| GOTERM BP DIRECT | GO:0002480--antigen processing and presentation of exogenous peptide antigen    | 5     | 0.373134 | 0.02542  | LNPEP, H  | 1214       | 9        | 16792     | 7.684422    | 0.999974   | 0.231908  | 4.637802 |
| GOTERM BP DIRECT | GO:0034629--cellular protein complex localization                               | 5     | 0.373134 | 0.02542  | NACC2, S  | 1214       | 9        | 16792     | 7.684422    | 0.999974   | 0.231908  | 4.637802 |
| GOTERM BP DIRECT | GO:0000082--G1/S transition of mitotic cell cycle                               | 17    | 1.268657 | 0.02577  | PPP6C, PK | 1214       | 102      | 16792     | 2.305327    | 0.999977   | 0.229683  | 4.700103 |
| GOTERM BP DIRECT | GO:0009749--response to glucose                                                 | 13    | 0.970149 | 0.03192  | TXNIP, P  | 1214       | 68       | 16792     | 2.644345    | 0.999998   | 0.270632  | 5.187513 |
| GOTERM BP DIRECT | GO:0035279--mRNA cleavage involved in gene silencing by miRNA                   | 4     | 0.298507 | 0.03366  | AGO1, AG  | 1214       | 5        | 16792     | 11.06557    | 0.999999   | 0.277534  | 6.096101 |
| GOTERM BP DIRECT | GO:1905007--positive regulation of epithelial to mesenchymal transition involve | 4     | 0.298507 | 0.03366  | TGFBR1, I | 1214       | 5        | 16792     | 11.06557    | 0.999999   | 0.277534  | 6.096101 |
| GOTERM BP DIRECT | GO:0008283--cell proliferation                                                  | 42    | 3.134328 | 0.0342   | PTGES3, I | 1214       | 366      | 16792     | 1.587274    | 0.999999   | 0.275914  | 6.191761 |
| GOTERM BP DIRECT | GO:0000209--protein polyubiquitination                                          | 25    | 1.865672 | 0.03499  | MKRN1, U  | 1214       | 184      | 16792     | 1.879342    | 1          | 0.27597   | 6.329448 |
| GOTERM BP DIRECT | GO:0042147--retrograde transport, endosome to Golgi                             | 13    | 0.970149 | 0.03615  | STX6, AR  | 1214       | 69       | 16792     | 2.660222    | 1          | 0.278524  | 6.533808 |
| GOTERM BP DIRECT | GO:0032880--regulation of protein localization                                  | 11    | 0.820896 | 0.03619  | STX6, SU  | 1214       | 52       | 16792     | 2.925992    | 1          | 0.273718  | 6.539858 |
| GOTERM BP DIRECT | GO:0034644--cellular response to UV                                             | 10    | 0.746269 | 0.03681  | USP28, N  | 1214       | 44       | 16792     | 3.143627    | 1          | 0.272777  | 6.648148 |
| GOTERM BP DIRECT | GO:0060412--ventricular septum morphogenesis                                    | 8     | 0.597015 | 0.03843  | SMAD7, T  | 1214       | 29       | 16792     | 3.815713    | 1          | 0.278044  | 6.931132 |
| GOTERM BP DIRECT | GO:0032092--positive regulation of protein binding                              | 12    | 0.895522 | 0.03927  | HSP90AB   | 1214       | 61       | 16792     | 2.721041    | 1          | 0.278366  | 7.076771 |
| GOTERM BP DIRECT | GO:0006355--regulation of transcription, DNA-templated                          | 136   | 10.14925 | 0.04261  | RALY, MC  | 1214       | 1504     | 16792     | 1.250762    | 1          | 0.293312  | 7.657639 |
| GOTERM BP DIRECT | GO:0006915--apoptotic process                                                   | 59    | 4.420985 | 0.04496  | DLG1, IER | 1214       | 567      | 16792     | 1.439305    | 1          | 0.30184   | 8.063319 |
| GOTERM BP DIRECT | GO:0032480--negative regulation of type I interferon production                 | 8     | 0.597015 | 0.04705  | MAVS, CY  | 1214       | 30       | 16792     | 3.688523    | 1          | 0.308548  | 8.422718 |
| GOTERM BP DIRECT | GO:0045165--cell fate commitment                                                | 10    | 0.746269 | 0.05025  | SPRY2, W  | 1214       | 46       | 16792     | 3.006948    | 1          | 0.320749  | 8.969453 |
| GOTERM BP DIRECT | GO:0000186--activation of MAPK activity                                         | 10    | 0.746269 | 0.05025  | MAP3K5    | 1214       | 46       | 16792     | 3.006948    | 1          | 0.320749  | 8.969453 |
| GOTERM BP DIRECT | GO:0090263--positive regulation of canonical Wnt signaling pathway              | 18    | 1.343284 | 0.05065  | FZD9, CA  | 1214       | 120      | 16792     | 2.074794    | 1          | 0.347943  | 10.042   |
| GOTERM BP DIRECT | GO:0050927--positive regulation of positive chemotaxis                          | 5     | 0.373134 | 0.05094  | S1PR1, F3 | 1214       | 11       | 16792     | 6.287255    | 1          | 0.355873  | 10.49129 |
| GOTERM BP DIRECT | GO:0007223--Wnt signaling pathway, calcium modulating pathway                   | 9     | 0.671642 | 0.05094  | PLSCR1, A | 1214       | 39       | 16792     | 3.191991    | 1          | 0.352008  | 10.5311  |
| GOTERM BP DIRECT | GO:0006919--activation of cysteine-type endopeptidase activity involved in apo  | 14    | 1.044776 | 0.06333  | DLL1, AC  | 1214       | 83       | 16792     | 2.333102    | 1          | 0.364986  | 11.17585 |
| GOTERM BP DIRECT | GO:0016477--cell migration                                                      | 23    | 1.716418 | 0.06345  | FNML3, A  | 1214       | 172      | 16792     | 1.849623    | 1          | 0.360646  | 11.19671 |
| GOTERM BP DIRECT | GO:0048681--negative regulation of axon regeneration                            | 4     | 0.298507 | 0.06637  | EPHA4, C  | 1214       | 6        | 16792     | 9.221307    | 1          | 0.35701   | 11.23947 |
| GOTERM BP DIRECT | GO:0010862--positive regulation of pathway-restricted SMAD protein phosphor     | 10    | 0.746269 | 0.06721  | ACVR1B    | 1214       | 48       | 16792     | 2.881658    | 1          | 0.367667  | 11.8211  |
| GOTERM BP DIRECT | GO:0007032--endosome organization                                               | 8     | 0.597015 | 0.06857  | STX6, TM  | 1214       | 32       | 16792     | 3.65739     | 1          | 0.368804  | 12.04694 |
| GOTERM BP DIRECT | GO:0030335--positive regulation of cell migration                               | 24    | 1.791045 | 0.07044  | BMP2, ST  | 1214       | 184      | 16792     | 1.804169    | 1          | 0.371987  | 12.35455 |
| GOTERM BP DIRECT | GO:0042787--protein ubiquitination involved in ubiquitin-dependent protein cat  | 21    | 1.567146 | 0.07093  | MYLIP, A  | 1214       | 153      | 16792     | 1.898504    | 1          | 0.369423  | 12.43515 |
| GOTERM BP DIRECT | GO:0034976--response to endoplasmic reticulum stress                            | 13    | 0.970149 | 0.07201  | PDI3A, T  | 1214       | 75       | 16792     | 2.397574    | 1          | 0.369321  | 12.61252 |
| GOTERM BP DIRECT | GO:1900034--regulation of cellular response to heat                             | 13    | 0.970149 | 0.07201  | PTGES3, I | 1214       | 75       | 16792     | 2.397574    | 1          | 0.369321  | 12.61252 |
| GOTERM BP DIRECT | GO:0006914--autophagy                                                           | 19    | 1.41791  | 0.07249  | HMGBl, F  | 1214       | 133      | 16792     | 1.975994    | 1          | 0.366818  | 12.69095 |
| GOTERM BP DIRECT | GO:0051301--cell division                                                       | 39    | 2.910448 | 0.07771  | CDK19, M  | 1214       | 350      |           |             |            |           |          |

|                  |                                                                                 |    |          |          |             |      |     |       |          |   |          |          |
|------------------|---------------------------------------------------------------------------------|----|----------|----------|-------------|------|-----|-------|----------|---|----------|----------|
| GOTERM BP DIRECT | GO:003032--lamellipodium assembly                                               | 7  | 0.522388 | 0.021695 | ABLIM1, I   | 1214 | 31  | 16792 | 3.123346 | 1 | 0.573992 | 33.58011 |
| GOTERM BP DIRECT | GO:0001836--release of cytochrome c from mitochondria                           | 6  | 0.447761 | 0.021982 | FZD9, DN    | 1214 | 23  | 16792 | 3.608338 | 1 | 0.580787 | 33.94318 |
| GOTERM BP DIRECT | GO:0016239--positive regulation of macroautophagy                               | 6  | 0.447761 | 0.021982 | HIF1A, UL   | 1214 | 23  | 16792 | 3.608338 | 1 | 0.580787 | 33.94318 |
| GOTERM BP DIRECT | GO:0006511--ubiquitin-dependent protein catabolic process                       | 22 | 1.641791 | 0.02239  | NPLC4, I    | 1214 | 182 | 16792 | 1.671995 | 1 | 0.584139 | 34.45493 |
| GOTERM BP DIRECT | GO:0070102--interleukin-6-mediated signaling pathway                            | 4  | 0.298507 | 0.022708 | GAB1, SM    | 1214 | 9   | 16792 | 6.147538 | 1 | 0.585959 | 34.85213 |
| GOTERM BP DIRECT | GO:0008354--germ cell migration                                                 | 4  | 0.298507 | 0.022708 | TGFBR1, I   | 1214 | 9   | 16792 | 6.147538 | 1 | 0.585959 | 34.85213 |
| GOTERM BP DIRECT | GO:2000188--regulation of cholesterol homeostasis                               | 4  | 0.298507 | 0.022708 | RALY, NR    | 1214 | 9   | 16792 | 6.147538 | 1 | 0.585959 | 34.85213 |
| GOTERM BP DIRECT | GO:0045184--establishment of protein localization                               | 8  | 0.597015 | 0.023013 | RCC2, NP    | 1214 | 40  | 16792 | 2.766392 | 1 | 0.587524 | 35.23054 |
| GOTERM BP DIRECT | GO:0043123--positive regulation of I-kappaB kinase/NF-kappaB signaling          | 20 | 1.492537 | 0.023418 | MYB, F2     | 1214 | 161 | 16792 | 1.718256 | 1 | 0.590633 | 35.72924 |
| GOTERM BP DIRECT | GO:0001666--response to hypoxia                                                 | 21 | 1.567164 | 0.02358  | BMP2, CA    | 1214 | 172 | 16792 | 1.688786 | 1 | 0.589881 | 35.92831 |
| GOTERM BP DIRECT | GO:0000165--MAPK cascade                                                        | 29 | 2.164179 | 0.024202 | NRG4, CA    | 1214 | 262 | 16792 | 1.531019 | 1 | 0.596244 | 36.68566 |
| GOTERM BP DIRECT | GO:0010628--positive regulation of gene expression                              | 29 | 2.164179 | 0.024202 | ELF1, PPA   | 1214 | 262 | 16792 | 1.531019 | 1 | 0.596244 | 36.68566 |
| GOTERM BP DIRECT | GO:0051895--negative regulation of focal adhesion assembly                      | 5  | 0.373134 | 0.024459 | DLC1, RC    | 1214 | 16  | 16792 | 4.322488 | 1 | 0.596895 | 36.99523 |
| GOTERM BP DIRECT | GO:1904355--positive regulation of telomere capping                             | 5  | 0.373134 | 0.024459 | MMPK1, M    | 1214 | 16  | 16792 | 4.322488 | 1 | 0.596895 | 36.99523 |
| GOTERM BP DIRECT | GO:1900745--positive regulation of p38MAPK cascade                              | 5  | 0.373134 | 0.024459 | MMP3K5, I   | 1214 | 16  | 16792 | 4.322488 | 1 | 0.596895 | 36.99523 |
| GOTERM BP DIRECT | GO:0032924--activin receptor signaling pathway                                  | 5  | 0.373134 | 0.024459 | ACVR1B, I   | 1214 | 16  | 16792 | 4.322488 | 1 | 0.596895 | 36.99523 |
| GOTERM BP DIRECT | GO:0032212--positive regulation of telomere maintenance via telomerase          | 7  | 0.522388 | 0.025119 | MMPK1, M    | 1214 | 32  | 16792 | 3.025741 | 1 | 0.603544 | 37.78536 |
| GOTERM BP DIRECT | GO:0010506--regulation of autophagy                                             | 9  | 0.671642 | 0.025805 | HMG1B, I    | 1214 | 50  | 16792 | 2.489753 | 1 | 0.610359 | 38.59717 |
| GOTERM BP DIRECT | GO:0046907--intracellular transport                                             | 6  | 0.447761 | 0.026161 | BLOC1S4, I  | 1214 | 24  | 16792 | 3.457999 | 1 | 0.612283 | 39.01479 |
| GOTERM BP DIRECT | GO:0048041--focal adhesion assembly                                             | 6  | 0.447761 | 0.026161 | DLC1, PD    | 1214 | 24  | 16792 | 3.457999 | 1 | 0.612283 | 39.01479 |
| GOTERM BP DIRECT | GO:0006366--transcription from RNA polymerase II promoter                       | 50 | 3.731343 | 0.027181 | BACH1, F    | 1214 | 513 | 16792 | 1.348144 | 1 | 0.623377 | 40.19528 |
| GOTERM BP DIRECT | GO:0048661--positive regulation of smooth muscle cell proliferation             | 10 | 0.746269 | 0.027422 | IRAK4, S1   | 1214 | 60  | 16792 | 2.305327 | 1 | 0.62354  | 40.4712  |
| GOTERM BP DIRECT | GO:0031647--regulation of protein stability                                     | 11 | 0.820896 | 0.028205 | MMPK1, U    | 1214 | 70  | 16792 | 2.173594 | 1 | 0.630943 | 41.35921 |
| GOTERM BP DIRECT | GO:0007265--Ras protein signal transduction                                     | 11 | 0.820896 | 0.028205 | NRAS, US    | 1214 | 70  | 16792 | 2.173594 | 1 | 0.630943 | 41.35921 |
| GOTERM BP DIRECT | GO:0003104--positive regulation of glomerular filtration                        | 3  | 0.223881 | 0.028358 | PDGF, F     | 1214 | 4   | 16792 | 10.37397 | 1 | 0.629876 | 41.53058 |
| GOTERM BP DIRECT | GO:0008356--asymmetric cell division                                            | 4  | 0.223881 | 0.028358 | ACTR2, P    | 1214 | 4   | 16792 | 10.37397 | 1 | 0.629876 | 41.53058 |
| GOTERM BP DIRECT | GO:1990086--lens fiber cell apoptotic process                                   | 3  | 0.223881 | 0.028358 | ETF1, E2F   | 1214 | 4   | 16792 | 10.37397 | 1 | 0.629876 | 41.53058 |
| GOTERM BP DIRECT | GO:0033631--cell-cell adhesion mediated by integrin                             | 3  | 0.223881 | 0.028358 | ITGA5, NI   | 1214 | 4   | 16792 | 10.37397 | 1 | 0.629876 | 41.53058 |
| GOTERM BP DIRECT | GO:1901031--regulation of response to reactive oxygen species                   | 3  | 0.223881 | 0.028358 | SES2, SE    | 1214 | 4   | 16792 | 10.37397 | 1 | 0.629876 | 41.53058 |
| GOTERM BP DIRECT | GO:0032392--DNA geometric change                                                | 3  | 0.223881 | 0.028358 | HMG1B, I    | 1214 | 4   | 16792 | 10.37397 | 1 | 0.629876 | 41.53058 |
| GOTERM BP DIRECT | GO:0032909--regulation of transforming growth factor beta2 production           | 3  | 0.223881 | 0.028358 | HIF1A, SG   | 1214 | 4   | 16792 | 10.37397 | 1 | 0.629876 | 41.53058 |
| GOTERM BP DIRECT | GO:0010718--positive regulation of epithelial to mesenchymal transition         | 7  | 0.522388 | 0.028884 | BMP2, TG    | 1214 | 33  | 16792 | 2.934052 | 1 | 0.633692 | 42.11903 |
| GOTERM BP DIRECT | GO:0070059--intrinsic apoptotic signaling pathway in response to endoplasmic r  | 7  | 0.522388 | 0.028884 | MMP3K5, I   | 1214 | 33  | 16792 | 2.934052 | 1 | 0.633692 | 42.11903 |
| GOTERM BP DIRECT | GO:0016055--Wnt signaling pathway                                               | 22 | 1.641791 | 0.029156 | CSNK1A1, I  | 1214 | 187 | 16792 | 1.627289 | 1 | 0.634153 | 42.41982 |
| GOTERM BP DIRECT | GO:0008285--negative regulation of cell proliferation                           | 40 | 0.985075 | 0.029726 | DLC1, TSC   | 1214 | 396 | 16792 | 1.397168 | 1 | 0.63839  | 43.04806 |
| GOTERM BP DIRECT | GO:0048208--COPII vesicle coating                                               | 10 | 0.746269 | 0.030183 | SEC23A, F   | 1214 | 61  | 16792 | 2.267535 | 1 | 0.641102 | 43.54576 |
| GOTERM BP DIRECT | GO:0031589--cell-substrate adhesion                                             | 5  | 0.373134 | 0.030201 | PPARD, PI   | 1214 | 17  | 16792 | 4.068224 | 1 | 0.638378 | 43.56595 |
| GOTERM BP DIRECT | GO:2000811--negative regulation of anoikis                                      | 5  | 0.373134 | 0.030201 | CAV1, MC    | 1214 | 17  | 16792 | 4.068224 | 1 | 0.638378 | 43.56595 |
| GOTERM BP DIRECT | GO:0033160--positive regulation of protein import into nucleus, translocation   | 4  | 0.298507 | 0.030728 | HSP90AB, I  | 1214 | 10  | 16792 | 5.532784 | 1 | 0.641899 | 44.13446 |
| GOTERM BP DIRECT | GO:0046902--regulation of mitochondrial membrane permeability                   | 4  | 0.298507 | 0.030728 | BCL2, TP    | 1214 | 10  | 16792 | 5.532784 | 1 | 0.641899 | 44.13446 |
| GOTERM BP DIRECT | GO:0042118--endothelial cell activation                                         | 4  | 0.298507 | 0.030728 | TGFBR1, I   | 1214 | 10  | 16792 | 5.532784 | 1 | 0.641899 | 44.13446 |
| GOTERM BP DIRECT | GO:0097192--extrinsic apoptotic signaling pathway in absence of ligand          | 7  | 0.522388 | 0.033003 | MCL1, BA    | 1214 | 34  | 16792 | 2.847757 | 1 | 0.665656 | 46.53104 |
| GOTERM BP DIRECT | GO:0001837--epithelial to mesenchymal transition                                | 7  | 0.522388 | 0.033003 | FAM83D, I   | 1214 | 34  | 16792 | 2.847757 | 1 | 0.665656 | 46.53104 |
| GOTERM BP DIRECT | GO:0060395--SMAD protein signal transduction                                    | 10 | 0.746269 | 0.033131 | LNPEP, BI   | 1214 | 62  | 16792 | 2.230961 | 1 | 0.66243  | 46.66347 |
| GOTERM BP DIRECT | GO:0042981--regulation of apoptotic process                                     | 24 | 1.791045 | 0.034587 | TNFRSF21, I | 1214 | 213 | 16792 | 1.585831 | 1 | 0.67738  | 48.14136 |
| GOTERM BP DIRECT | GO:0045727--positive regulation of translation                                  | 9  | 0.671642 | 0.035272 | MMPK1, E    | 1214 | 53  | 16792 | 2.348823 | 1 | 0.681846 | 48.82362 |
| GOTERM BP DIRECT | GO:0040008--regulation of growth                                                | 9  | 0.671642 | 0.035272 | MORF4L1, I  | 1214 | 53  | 16792 | 2.348823 | 1 | 0.681846 | 48.82362 |
| GOTERM BP DIRECT | GO:0045930--negative regulation of mitotic cell cycle                           | 6  | 0.447761 | 0.035955 | CDKN1B, I   | 1214 | 26  | 16792 | 3.191991 | 1 | 0.686171 | 49.49585 |
| GOTERM BP DIRECT | GO:0006457--protein folding                                                     | 21 | 1.567164 | 0.035989 | HSP90AB, I  | 1214 | 180 | 16792 | 1.613729 | 1 | 0.68375  | 49.52865 |
| GOTERM BP DIRECT | GO:0060070--canonical Wnt signaling pathway                                     | 12 | 0.895522 | 0.036027 | FZD9, TBI   | 1214 | 83  | 16792 | 1.999802 | 1 | 0.681388 | 49.56531 |
| GOTERM BP DIRECT | GO:0010039--response to iron                                                    | 5  | 0.373134 | 0.036672 | CND1B, B    | 1214 | 18  | 16792 | 3.842211 | 1 | 0.685245 | 50.19134 |
| GOTERM BP DIRECT | GO:0045089--positive regulation of innate immune response                       | 5  | 0.373134 | 0.036672 | POLR3G, I   | 1214 | 18  | 16792 | 3.842211 | 1 | 0.685245 | 50.19134 |
| GOTERM BP DIRECT | GO:0036120--cellular response to platelet-derived growth factor stimulus        | 5  | 0.373134 | 0.036672 | CREB1, H    | 1214 | 18  | 16792 | 3.842211 | 1 | 0.685245 | 50.19134 |
| GOTERM BP DIRECT | GO:0010501--RNA secondary structure unwinding                                   | 8  | 0.597015 | 0.036906 | DDX19A, A   | 1214 | 44  | 16792 | 2.514902 | 1 | 0.6849   | 50.41669 |
| GOTERM BP DIRECT | GO:0023014--signal transduction by protein phosphorylation                      | 8  | 0.597015 | 0.036906 | PAK6, AC    | 1214 | 44  | 16792 | 2.514902 | 1 | 0.6849   | 50.41669 |
| GOTERM BP DIRECT | GO:0010629--negative regulation of gene expression                              | 17 | 1.268657 | 0.038454 | DLDR, PD    | 1214 | 137 | 16792 | 1.716375 | 1 | 0.697421 | 51.88256 |
| GOTERM BP DIRECT | GO:0006413--translational initiation                                            | 17 | 1.268657 | 0.038454 | RPL17, RF   | 1214 | 137 | 16792 | 1.716375 | 1 | 0.697421 | 51.88256 |
| GOTERM BP DIRECT | GO:0048146--positive regulation of fibroblast proliferation                     | 9  | 0.671642 | 0.038888 | CNNB1, E    | 1214 | 54  | 16792 | 2.305327 | 1 | 0.69891  | 52.28606 |
| GOTERM BP DIRECT | GO:0090161--Golgi ribbon formation                                              | 4  | 0.298507 | 0.040029 | STX6, ST    | 1214 | 11  | 16792 | 5.029804 | 1 | 0.706929 | 53.33192 |
| GOTERM BP DIRECT | GO:0031571--mitotic G1 DNA damage checkpoint                                    | 4  | 0.298507 | 0.040029 | RPA2, CC    | 1214 | 11  | 16792 | 5.029804 | 1 | 0.706929 | 53.33192 |
| GOTERM BP DIRECT | GO:0060213--positive regulation of nuclear-transcribed mRNA poly(A) tail shor   | 4  | 0.298507 | 0.040029 | BTG2, AG    | 1214 | 11  | 16792 | 5.029804 | 1 | 0.706929 | 53.33192 |
| GOTERM BP DIRECT | GO:0030278--regulation of ossification                                          | 4  | 0.298507 | 0.040029 | MMPK1, E    | 1214 | 11  | 16792 | 5.029804 | 1 | 0.706929 | 53.33192 |
| GOTERM BP DIRECT | GO:0030514--negative regulation of BMP signaling pathway                        | 8  | 0.597015 | 0.041086 | NBL1, WN    | 1214 | 45  | 16792 | 2.459015 | 1 | 0.713885 | 54.28091 |
| GOTERM BP DIRECT | GO:0008542--visual learning                                                     | 8  | 0.597015 | 0.041086 | AP1, HIF1   | 1214 | 45  | 16792 | 2.459015 | 1 | 0.713885 | 54.28091 |
| GOTERM BP DIRECT | GO:0007029--endoplasmic reticulum organization                                  | 6  | 0.447761 | 0.041593 | DNM1L, A    | 1214 | 27  | 16792 | 3.073769 | 1 | 0.715806 | 54.73021 |
| GOTERM BP DIRECT | GO:0055007--cardiac muscle cell differentiation                                 | 6  | 0.447761 | 0.041593 | BMP2, GA    | 1214 | 27  | 16792 | 3.073769 | 1 | 0.715806 | 54.73021 |
| GOTERM BP DIRECT | GO:0007611--learning or memory                                                  | 7  | 0.522388 | 0.042335 | FZD9, EG    | 1214 | 36  | 16792 | 2.689548 | 1 | 0.719715 | 55.37957 |
| GOTERM BP DIRECT | GO:0042059--negative regulation of epidermal growth factor receptor signaling p | 7  | 0.522388 | 0.042335 | SPRY2, R1   | 1214 | 36  | 16792 | 2.689548 | 1 | 0.719715 | 55.37957 |
| GOTERM BP DIRECT | GO:0016925--protein sumoylation                                                 | 15 | 1.119403 | 0.04527  | NUP98, EC   | 1214 | 117 | 16792 | 1.773328 | 1 | 0.718842 | 55.94595 |
| GOTERM BP DIRECT | GO:0006897--endocytosis                                                         | 17 | 1.268657 | 0.043047 | DNM1L, L    | 1214 | 139 | 16792 | 1.691769 | 1 | 0.720773 | 55.99458 |
| GOTERM BP DIRECT | GO:0042276--error-prone recombination                                           | 5  | 0.373134 | 0.043877 | RPA2, RF    | 1214 | 19  | 16792 | 6.33999  | 1 | 0.725233 | 56.70061 |
| GOTERM BP DIRECT | GO:0045672--positive regulation of osteoclast differentiation                   | 5  | 0.373134 | 0.043877 | IL23R, CR   | 1214 | 19  | 16792 | 6.33999  | 1 | 0.725233 | 56.70061 |
| GOTERM BP DIRECT | GO:0070987--error-free translation synthesis                                    | 5  | 0.373134 | 0.043877 | RPA2, NP1   | 1214 | 19  | 16792 | 6.33999  | 1 | 0.725233 | 56.70061 |
| GOTERM BP DIRECT | GO:0006895--Golgi to endosome transport                                         | 5  | 0.373134 | 0.043877 | TGOLN2, I   | 1214 | 19  | 16792 | 6.33999  | 1 | 0.725233 | 56.70061 |
| GOTERM BP DIRECT | GO:0006089--lactate metabolic process                                           | 3  | 0.223881 | 0.045019 | LDHB, HI    | 1214 | 5   | 16792 | 8.299176 | 1 | 0.732089 | 57.65547 |
| GOTERM BP DIRECT | GO:0043550--regulation of lipid kinase activity                                 | 3  | 0.223881 | 0.045019 | RBL2, RB    | 1214 | 5   | 16792 | 8.299176 | 1 | 0.732089 | 57.65547 |
| GOTERM BP DIRECT | GO:1990314--cellular response to insulin-like growth factor stimulus            | 3  | 0.223881 | 0.045019 | SLC25A33, I | 1214 | 5   | 16792 | 8.299176 | 1 | 0.732089 | 57.65547 |
| GOTERM BP DIRECT | GO:0006686--sphingomyelin biosynthetic process                                  | 3  | 0.223881 | 0.045019 | SAMD8, S    | 1214 | 5   | 16792 | 8.299176 | 1 | 0.732089 | 57.65547 |
| GOTERM BP DIRECT | GO:0033289--atrial septum primum morphogenesis                                  | 3  | 0.223881 | 0.045019 | SOX4, AC    | 1214 | 5   | 16792 | 8.299176 | 1 | 0.732089 | 57.65547 |
| GOTERM BP DIRECT | GO:0016575--histone deacetylation                                               | 8  | 0.597015 | 0.045561 | MORF4L1, I  | 1214 | 46  | 16792 | 2.405558 | 1 | 0.733987 | 58.10176 |
| GOTERM BP DIRECT | GO:0016197--endosomal transport                                                 | 10 | 0.746269 | 0.046905 | AP5B1, TS   | 1214 | 66  | 16792 | 2.095752 | 1 | 0.742036 | 59.18855 |
| GOTERM BP DIRECT | GO:0006367--transcription initiation from RNA polymerase II promoter            | 18 | 1.343284 | 0.047702 | E2F2, PPA   | 1214 | 152 | 16792 | 1.673995 | 1 | 0.745693 | 59.82047 |
| GOTERM BP DIRECT | GO:0045931--positive regulation of mitotic cell cycle                           | 6  | 0.447761 | 0.047734 | CNNB1, E    | 1214 | 28  | 16792 | 2.963992 | 1 | 0.743591 | 59.84631 |
| GOTERM           |                                                                                 |    |          |          |             |      |     |       |          |   |          |          |

|                  |                                                                                  |    |          |          |            |      |     |       |          |   |          |          |
|------------------|----------------------------------------------------------------------------------|----|----------|----------|------------|------|-----|-------|----------|---|----------|----------|
| GOTERM BP DIRECT | GO:0006207--de novo' pyrimidine nucleobase biosynthetic process                  | 3  | 0.223881 | 0.064343 | DHODH, C   | 1214 | 6   | 16792 | 6.91598  | 1 | 0.806268 | 71.0816  |
| GOTERM BP DIRECT | GO:1903672--positive regulation of sprouting angiogenesis                        | 3  | 0.223881 | 0.064343 | HMG1B, I   | 1214 | 6   | 16792 | 6.91598  | 1 | 0.806268 | 71.0816  |
| GOTERM BP DIRECT | GO:0007346--regulation of mitotic cell cycle                                     | 7  | 0.522388 | 0.065546 | CYLD, CE   | 1214 | 40  | 16792 | 2.420593 | 1 | 0.810455 | 71.7674  |
| GOTERM BP DIRECT | GO:0043280--positive regulation of cysteine-type endopeptidase activity involve  | 7  | 0.522388 | 0.065546 | HMG1B, M   | 1214 | 40  | 16792 | 2.420593 | 1 | 0.810455 | 71.7674  |
| GOTERM BP DIRECT | GO:0045669--positive regulation of osteoblast differentiation                    | 9  | 0.671642 | 0.065756 | BMP2, W    | 1214 | 60  | 16792 | 2.074794 | 1 | 0.809639 | 71.88568 |
| GOTERM BP DIRECT | GO:0007411--axon guidance                                                        | 18 | 1.343284 | 0.067261 | ZNF280B, C | 1214 | 159 | 16792 | 1.565882 | 1 | 0.815149 | 72.71838 |
| GOTERM BP DIRECT | GO:0002576--platelet degranulation                                               | 13 | 0.907149 | 0.06765  | PHACTR2    | 1214 | 103 | 16792 | 1.745781 | 1 | 0.815194 | 72.9299  |
| GOTERM BP DIRECT | GO:0071260--cellular response to mechanical stimulus                             | 10 | 0.746269 | 0.068855 | SCL38A2, C | 1214 | 71  | 16792 | 1.948163 | 1 | 0.819079 | 73.57543 |
| GOTERM BP DIRECT | GO:1990090--cellular response to nerve growth factor stimulus                    | 6  | 0.447761 | 0.069202 | E2F1, APP  | 1214 | 31  | 16792 | 2.677154 | 1 | 0.818908 | 73.75859 |
| GOTERM BP DIRECT | GO:0010332--response to gamma radiation                                          | 6  | 0.447761 | 0.069202 | BAX, BCL   | 1214 | 31  | 16792 | 2.677154 | 1 | 0.818908 | 73.75859 |
| GOTERM BP DIRECT | GO:0043552--positive regulation of phosphatidylinositol 3-kinase activity        | 6  | 0.447761 | 0.069202 | PDGF, S    | 1214 | 31  | 16792 | 2.677154 | 1 | 0.818908 | 73.75859 |
| GOTERM BP DIRECT | GO:1904886--beta-catenin destruction complex disassembly                         | 5  | 0.373134 | 0.069865 | CSNK1A1    | 1214 | 22  | 16792 | 3.143627 | 1 | 0.820192 | 74.10496 |
| GOTERM BP DIRECT | GO:0006470--protein dephosphorylation                                            | 15 | 1.119403 | 0.070697 | PPP2R1A, C | 1214 | 126 | 16792 | 1.646662 | 1 | 0.822219 | 74.53389 |
| GOTERM BP DIRECT | GO:0006950--response to stress                                                   | 9  | 0.671642 | 0.071126 | HSP90AB    | 1214 | 61  | 16792 | 2.040781 | 1 | 0.822404 | 74.75196 |
| GOTERM BP DIRECT | GO:0007219--Notch signaling pathway                                              | 14 | 1.044776 | 0.071383 | DTX4, AP   | 1214 | 115 | 16792 | 1.683891 | 1 | 0.821825 | 74.88208 |
| GOTERM BP DIRECT | GO:0001649--osteoblast differentiation                                           | 13 | 0.970149 | 0.071699 | BMP3, BV   | 1214 | 104 | 16792 | 1.728995 | 1 | 0.821511 | 75.0409  |
| GOTERM BP DIRECT | GO:0031397--negative regulation of protein ubiquitination                        | 7  | 0.522388 | 0.072312 | CAV1, N4   | 1214 | 41  | 16792 | 2.361554 | 1 | 0.822515 | 75.34668 |
| GOTERM BP DIRECT | GO:0044255--cellular lipid metabolic process                                     | 7  | 0.522388 | 0.072312 | NR1H2, T1  | 1214 | 41  | 16792 | 2.361554 | 1 | 0.822515 | 75.34668 |
| GOTERM BP DIRECT | GO:1902043--positive regulation of extrinsic apoptotic signaling pathway via c   | 4  | 0.298507 | 0.075204 | PEA15, SK  | 1214 | 14  | 16792 | 3.951989 | 1 | 0.833318 | 76.74161 |
| GOTERM BP DIRECT | GO:0042176--regulation of protein catabolic process                              | 4  | 0.298507 | 0.075204 | FAM83D, C  | 1214 | 14  | 16792 | 3.951989 | 1 | 0.833318 | 76.74161 |
| GOTERM BP DIRECT | GO:0010801--negative regulation of peptidyl-threonine phosphorylation            | 4  | 0.298507 | 0.075204 | SPRY2, P   | 1214 | 14  | 16792 | 3.951989 | 1 | 0.833318 | 76.74161 |
| GOTERM BP DIRECT | GO:0003407--neural retina development                                            | 4  | 0.298507 | 0.075204 | ATP2B1, F  | 1214 | 14  | 16792 | 3.951989 | 1 | 0.833318 | 76.74161 |
| GOTERM BP DIRECT | GO:2001241--positive regulation of extrinsic apoptotic signaling pathway in abs  | 4  | 0.298507 | 0.075204 | PPP2R1A, C | 1214 | 14  | 16792 | 3.951989 | 1 | 0.833318 | 76.74161 |
| GOTERM BP DIRECT | GO:0051016--barbed-end actin filament capping                                    | 4  | 0.298507 | 0.075204 | TRIOBP, I  | 1214 | 14  | 16792 | 3.951989 | 1 | 0.833318 | 76.74161 |
| GOTERM BP DIRECT | GO:0030194--positive regulation of blood coagulation                             | 4  | 0.298507 | 0.075204 | SERPINE1   | 1214 | 14  | 16792 | 3.951989 | 1 | 0.833318 | 76.74161 |
| GOTERM BP DIRECT | GO:0032461--positive regulation of protein oligomerization                       | 4  | 0.298507 | 0.075204 | SH3GLB1, C | 1214 | 14  | 16792 | 3.951989 | 1 | 0.833318 | 76.74161 |
| GOTERM BP DIRECT | GO:0071425--hematopoietic stem cell proliferation                                | 4  | 0.298507 | 0.075204 | WNT1, W    | 1214 | 14  | 16792 | 3.951989 | 1 | 0.833318 | 76.74161 |
| GOTERM BP DIRECT | GO:0006461--protein complex assembly                                             | 14 | 1.044776 | 0.075346 | PPP2R1A, C | 1214 | 116 | 16792 | 1.669375 | 1 | 0.83212  | 76.80834 |
| GOTERM BP DIRECT | GO:0046854--phosphatidylinositol phosphorylation                                 | 12 | 0.895522 | 0.075976 | NRG4, FG   | 1214 | 94  | 16792 | 1.765782 | 1 | 0.833073 | 77.10143 |
| GOTERM BP DIRECT | GO:1900026--positive regulation of substrate adhesion-dependent cell spreading   | 6  | 0.447761 | 0.077366 | TRIOBP, /  | 1214 | 32  | 16792 | 2.593493 | 1 | 0.837061 | 77.73537 |
| GOTERM BP DIRECT | GO:0061024--membrane organization                                                | 6  | 0.447761 | 0.077366 | HNPEP, Y   | 1214 | 32  | 16792 | 2.593493 | 1 | 0.837061 | 77.73537 |
| GOTERM BP DIRECT | GO:0042220--response to cocaine                                                  | 6  | 0.447761 | 0.077366 | HSP90AB    | 1214 | 32  | 16792 | 2.593493 | 1 | 0.837061 | 77.73537 |
| GOTERM BP DIRECT | GO:0045595--regulation of cell differentiation                                   | 6  | 0.447761 | 0.077366 | SPRY2, PI  | 1214 | 32  | 16792 | 2.593493 | 1 | 0.837061 | 77.73537 |
| GOTERM BP DIRECT | GO:0001974--blood vessel remodeling                                              | 6  | 0.447761 | 0.077366 | EPAS1, B   | 1214 | 32  | 16792 | 2.593493 | 1 | 0.837061 | 77.73537 |
| GOTERM BP DIRECT | GO:0007259--JAK-STAT cascade                                                     | 6  | 0.447761 | 0.077366 | IFNAR2, F  | 1214 | 32  | 16792 | 2.593493 | 1 | 0.837061 | 77.73537 |
| GOTERM BP DIRECT | GO:0043547--positive regulation of GTPase activity                               | 51 | 3.80597  | 0.077758 | DLR1, NR   | 1214 | 565 | 16792 | 1.248549 | 1 | 0.837014 | 77.91105 |
| GOTERM BP DIRECT | GO:0009791--post-embryonic development                                           | 10 | 0.746269 | 0.079171 | SGPL1, TC  | 1214 | 73  | 16792 | 1.894789 | 1 | 0.840949 | 78.53421 |
| GOTERM BP DIRECT | GO:0050729--positive regulation of inflammatory response                         | 10 | 0.746269 | 0.079171 | CDK19, C   | 1214 | 73  | 16792 | 1.894789 | 1 | 0.840949 | 78.53421 |
| GOTERM BP DIRECT | GO:0001658--branching involved in ureteric bud morphogenesis                     | 7  | 0.522388 | 0.079462 | WNT1, BA   | 1214 | 42  | 16792 | 2.305327 | 1 | 0.840499 | 78.66042 |
| GOTERM BP DIRECT | GO:0032967--positive regulation of collagen biosynthetic process                 | 5  | 0.373134 | 0.079946 | AMELX, I   | 1214 | 23  | 16792 | 3.006948 | 1 | 0.840789 | 78.68649 |
| GOTERM BP DIRECT | GO:0006479--protein methylation                                                  | 5  | 0.373134 | 0.079946 | ARMT1, B   | 1214 | 23  | 16792 | 3.006948 | 1 | 0.840789 | 78.68649 |
| GOTERM BP DIRECT | GO:0000083--regulation of transcription involved in G1/S transition of mitotic c | 5  | 0.373134 | 0.079946 | BACH1, R   | 1214 | 23  | 16792 | 3.006948 | 1 | 0.840789 | 78.68649 |
| GOTERM BP DIRECT | GO:0071398--cellular response to fatty acid                                      | 5  | 0.373134 | 0.079946 | CENB1, E   | 1214 | 23  | 16792 | 3.006948 | 1 | 0.840789 | 78.68649 |
| GOTERM BP DIRECT | GO:0030307--positive regulation of cell growth                                   | 11 | 0.820896 | 0.080332 | IFG42, C   | 1214 | 84  | 16792 | 1.811328 | 1 | 0.840708 | 79.03342 |
| GOTERM BP DIRECT | GO:0030336--negative regulation of cell migration                                | 12 | 0.895522 | 0.08061  | DLR1, AD   | 1214 | 95  | 16792 | 1.747195 | 1 | 0.840217 | 79.15118 |
| GOTERM BP DIRECT | GO:0009611--response to wounding                                                 | 9  | 0.671642 | 0.082643 | FZL3, W    | 1214 | 63  | 16792 | 1.975994 | 1 | 0.846244 | 79.94665 |
| GOTERM BP DIRECT | GO:0043066--negative regulation of apoptotic process                             | 42 | 3.134328 | 0.083642 | ARL6IP1, P | 1214 | 455 | 16792 | 1.276796 | 1 | 0.848349 | 80.39732 |
| GOTERM BP DIRECT | GO:0001525--angiogenesis                                                         | 23 | 1.716418 | 0.084488 | SCL12A6, C | 1214 | 223 | 16792 | 1.426615 | 1 | 0.849868 | 80.73218 |
| GOTERM BP DIRECT | GO:0000187--activation of MAPK activity                                          | 13 | 0.970149 | 0.084767 | BMP2, M    | 1214 | 107 | 16792 | 1.680519 | 1 | 0.849378 | 80.84145 |
| GOTERM BP DIRECT | GO:0009636--response to toxic substance                                          | 11 | 0.820896 | 0.085463 | MAPK1, V   | 1214 | 85  | 16792 | 1.790018 | 1 | 0.85035  | 81.11561 |
| GOTERM BP DIRECT | GO:0010586--miRNA metabolic process                                              | 3  | 0.223881 | 0.085859 | AGO1, AG   | 1214 | 7   | 16792 | 5.927983 | 1 | 0.850269 | 81.26337 |
| GOTERM BP DIRECT | GO:0008064--regulation of actin polymerization or depolymerization               | 3  | 0.223881 | 0.085859 | SH2, AR1   | 1214 | 7   | 16792 | 5.927983 | 1 | 0.850269 | 81.26337 |
| GOTERM BP DIRECT | GO:0072643--interferon-gamma secretion                                           | 3  | 0.223881 | 0.085859 | BTN3A1, I  | 1214 | 7   | 16792 | 5.927983 | 1 | 0.850269 | 81.26337 |
| GOTERM BP DIRECT | GO:0000578--embryonic axis specification                                         | 3  | 0.223881 | 0.085859 | STIL, WN   | 1214 | 7   | 16792 | 5.927983 | 1 | 0.850269 | 81.26337 |
| GOTERM BP DIRECT | GO:0071679--commissural neuron axon guidance                                     | 3  | 0.223881 | 0.085859 | NRP1, VE   | 1214 | 7   | 16792 | 5.927983 | 1 | 0.850269 | 81.26337 |
| GOTERM BP DIRECT | GO:0019885--antigen processing and presentation of endogenous peptide antigen    | 3  | 0.223881 | 0.085859 | HLA-A, EI  | 1214 | 7   | 16792 | 5.927983 | 1 | 0.850269 | 81.26337 |
| GOTERM BP DIRECT | GO:0048842--positive regulation of axon extension involved in axon guidance      | 3  | 0.223881 | 0.085859 | NRP1, VE   | 1214 | 7   | 16792 | 5.927983 | 1 | 0.850269 | 81.26337 |
| GOTERM BP DIRECT | GO:0001844--protein insertion into mitochondrial membrane involved in apopto     | 3  | 0.223881 | 0.085859 | BAX, PM    | 1214 | 7   | 16792 | 5.927983 | 1 | 0.850269 | 81.26337 |
| GOTERM BP DIRECT | GO:0006029--proteoglycan metabolic process                                       | 3  | 0.223881 | 0.085859 | BMP2, PP   | 1214 | 7   | 16792 | 5.927983 | 1 | 0.850269 | 81.26337 |
| GOTERM BP DIRECT | GO:0048102--autophagic cell death                                                | 3  | 0.223881 | 0.085859 | CDKN1B, C  | 1214 | 7   | 16792 | 5.927983 | 1 | 0.850269 | 81.26337 |
| GOTERM BP DIRECT | GO:0032287--peripheral nervous system myelin maintenance                         | 3  | 0.223881 | 0.085859 | MPP5, ND   | 1214 | 7   | 16792 | 5.927983 | 1 | 0.850269 | 81.26337 |
| GOTERM BP DIRECT | GO:0060982--coronary artery morphogenesis                                        | 3  | 0.223881 | 0.085859 | NRP1, TG   | 1214 | 7   | 16792 | 5.927983 | 1 | 0.850269 | 81.26337 |
| GOTERM BP DIRECT | GO:0034616--response to laminar fluid shear stress                               | 3  | 0.223881 | 0.085859 | SMAD7, S   | 1214 | 7   | 16792 | 5.927983 | 1 | 0.850269 | 81.26337 |
| GOTERM BP DIRECT | GO:0071455--cellular response to hyperoxia                                       | 3  | 0.223881 | 0.085859 | SM1, PP    | 1214 | 7   | 16792 | 5.927983 | 1 | 0.850269 | 81.26337 |
| GOTERM BP DIRECT | GO:0051297--centrosome organization                                              | 6  | 0.447761 | 0.086023 | CEP120, B  | 1214 | 33  | 16792 | 2.514902 | 1 | 0.84939  | 81.32616 |
| GOTERM BP DIRECT | GO:1902042--negative regulation of extrinsic apoptotic signaling pathway via c   | 6  | 0.447761 | 0.086023 | PEA15, AF  | 1214 | 33  | 16792 | 2.514902 | 1 | 0.84939  | 81.32616 |
| GOTERM BP DIRECT | GO:0048538--thymus development                                                   | 7  | 0.522388 | 0.086994 | MAPK1, M   | 1214 | 43  | 16792 | 2.251714 | 1 | 0.85129  | 81.69273 |
| GOTERM BP DIRECT | GO:0000184--nuclear-transcribed mRNA catabolic process, nonsense-mediated c      | 14 | 1.044776 | 0.088073 | RPL17, PP  | 1214 | 119 | 16792 | 1.627289 | 1 | 0.853514 | 82.09234 |
| GOTERM BP DIRECT | GO:0032436--positive regulation of proteasomal ubiquitin-dependent protein cat   | 9  | 0.671642 | 0.08879  | CSNK1A1    | 1214 | 64  | 16792 | 1.945119 | 1 | 0.854489 | 82.35286 |
| GOTERM BP DIRECT | GO:0042632--cholesterol homeostasis                                              | 9  | 0.671642 | 0.08879  | NR1H2, A   | 1214 | 64  | 16792 | 1.945119 | 1 | 0.854489 | 82.35286 |
| GOTERM BP DIRECT | GO:0008631--intrinsic apoptotic signaling pathway in response to oxidative stre  | 4  | 0.298507 | 0.089147 | MAP3K5, C  | 1214 | 15  | 16792 | 3.688523 | 1 | 0.854271 | 82.48152 |
| GOTERM BP DIRECT | GO:0030330--DNA damage response, signal transduction by p53 class mediator       | 4  | 0.298507 | 0.089147 | TP53, NDI  | 1214 | 15  | 16792 | 3.688523 | 1 | 0.854271 | 82.48152 |
| GOTERM BP DIRECT | GO:0032793--positive regulation of CREB transcription factor activity            | 4  | 0.298507 | 0.089147 | RPS6KA5, C | 1214 | 15  | 16792 | 3.688523 | 1 | 0.854271 | 82.48152 |
| GOTERM BP DIRECT | GO:0035024--negative regulation of Rho protein signal transduction               | 4  | 0.298507 | 0.089147 | DLG1, AR   | 1214 | 15  | 16792 | 3.688523 | 1 | 0.854271 | 82.48152 |
| GOTERM BP DIRECT | GO:0006122--mitochondrial electron transport, ubiquinol to cytochrome c          | 4  | 0.298507 | 0.089147 | UQCRC1, C  | 1214 | 15  | 16792 | 3.688523 | 1 | 0.854271 | 82.48152 |
| GOTERM BP DIRECT | GO:0007623--circadian rhythm                                                     | 10 | 0.746269 | 0.090376 | NONO, CF   | 1214 | 75  | 16792 | 1.844261 | 1 | 0.856897 | 82.91736 |
| GOTERM BP DIRECT | GO:0045737--positive regulation of cyclin-dependent protein serine/threonine kin | 5  | 0.373134 | 0.090702 | CND1, C    | 1214 | 24  | 16792 | 2.881658 | 1 | 0.856575 | 83.03131 |
| GOTERM BP DIRECT | GO:0030010--establishment of cell polarity                                       | 5  | 0.373134 | 0.090702 | UST, WW    | 1214 | 24  | 16792 | 2.881658 | 1 | 0.856575 | 83.03131 |
| GOTERM BP DIRECT | GO:0043524--negative regulation of neuron apoptotic process                      | 15 | 1.119403 | 0.095072 | HSP90AB    | 1214 | 132 | 16792 | 1.571814 | 1 | 0.868707 | 84.48974 |
| GOTERM BP DIRECT | GO:0001932--regulation of protein phosphorylation                                | 6  | 0.447761 | 0.095165 | CDC8C      | 1214 | 34  | 16792 | 2.440934 | 1 | 0.867674 | 84.51925 |
| GOTERM BP DIRECT | GO:0035019--somatic stem cell population maintenance                             | 9  | 0.671642 | 0.095194 | EPAS1, KI  | 1214 | 65  | 16792 | 1.915195 | 1 | 0.866456 | 84.52871 |
| GOTERM BP DIRECT | GO:0006021--palate development                                                   | 10 | 0.746269 | 0.096311 | SGPL1, SU  | 1214 | 76  | 16792 | 1.819995 | 1 | 0.868447 | 84.88118 |
| GOTERM BP DIRECT | GO:0019882--antigen processing and presentation                                  | 8  | 0.597015 | 0.099638 | MICB, RA   | 1214 | 55  | 16792 | 2.011922 | 1 |          |          |

| Category  | Term                                                    | Count | %        | PValue   | Genes      | List Total | Pop Hits | Pop Total | Fold Enrich | Bonferroni | Benjamini | FDR      |
|-----------|---------------------------------------------------------|-------|----------|----------|------------|------------|----------|-----------|-------------|------------|-----------|----------|
| GOTERM CC | DIRECT GO:0005829--cytosol                              | 357   | 26.64179 | 9.06E-20 | TGOLN2,    | 1269       | 3315     | 18224     | 1.54656     | 6.35E-17   | 6.35E-17  | 1.37E-16 |
| GOTERM CC | DIRECT GO:0005654--nucleoplasm                          | 306   | 22.83582 | 6.43E-18 | TGOLN2,    | 1269       | 2784     | 18224     | 1.578463    | 4.50E-15   | 2.25E-15  | 9.70E-15 |
| GOTERM CC | DIRECT GO:0016020--membrane                             | 228   | 17.01493 | 2.35E-10 | LDHB, DY   | 1269       | 2200     | 18224     | 1.488313    | 1.65E-07   | 5.49E-08  | 3.55E-07 |
| GOTERM CC | DIRECT GO:0005634--nucleus                              | 475   | 35.44776 | 7.46E-10 | DLC1, RP1  | 1269       | 5415     | 18224     | 1.259729    | 5.22E-07   | 1.31E-07  | 1.13E-06 |
| GOTERM CC | DIRECT GO:0005737--cytoplasm                            | 450   | 33.58209 | 3.67E-08 | DLC1, LD   | 1269       | 5222     | 18224     | 1.237536    | 2.57E-05   | 5.14E-06  | 5.54E-05 |
| GOTERM CC | DIRECT GO:0005925--focal adhesion                       | 53    | 3.955224 | 4.97E-06 | PVR, KIF2  | 1269       | 391      | 18224     | 1.94662     | 0.003473   | 5.80E-04  | 0.007494 |
| GOTERM CC | DIRECT GO:0048471--perinuclear region of cytoplasm      | 74    | 5.522388 | 6.91E-06 | SEPT2, NI  | 1269       | 621      | 18224     | 1.711284    | 0.004822   | 6.90E-04  | 0.010413 |
| GOTERM CC | DIRECT GO:0043231--intracellular membrane-bounded org   | 67    | 5        | 1.59E-05 | ACOX1, A   | 1269       | 558      | 18224     | 1.724339    | 0.011053   | 0.001388  | 0.023942 |
| GOTERM CC | DIRECT GO:0005794--Golgi apparatus                      | 91    | 6.791045 | 6.91E-05 | TGOLN2,    | 1269       | 863      | 18224     | 1.514303    | 0.0472     | 0.005358  | 0.10411  |
| GOTERM CC | DIRECT GO:0016605--PML body                             | 19    | 1.41791  | 1.29E-04 | MKNK2, T   | 1269       | 98       | 18224     | 2.784259    | 0.086107   | 0.008964  | 0.193797 |
| GOTERM CC | DIRECT GO:0005913--cell-cell adherens junction          | 42    | 3.134328 | 1.37E-04 | PVR, HSP   | 1269       | 323      | 18224     | 1.867363    | 0.091701   | 0.008706  | 0.206996 |
| GOTERM CC | DIRECT GO:0005768--endosome                             | 32    | 2.38806  | 2.05E-04 | TGOLN2,    | 1269       | 225      | 18224     | 2.042441    | 0.133728   | 0.011892  | 0.308797 |
| GOTERM CC | DIRECT GO:0005769--early endosome                       | 32    | 2.38806  | 2.81E-04 | HMG1B1, T  | 1269       | 229      | 18224     | 2.006765    | 0.17886    | 0.015044  | 0.423645 |
| GOTERM CC | DIRECT GO:0035068--micro-ribonucleoprotein complex      | 5     | 0.373134 | 3.12E-04 | AGO1, AC   | 1269       | 6        | 18224     | 11.96743    | 0.196382   | 0.015495  | 0.469905 |
| GOTERM CC | DIRECT GO:0034045--pre-autophagosomal structure memb    | 7     | 0.522388 | 4.89E-04 | ATG2B, U   | 1269       | 16       | 18224     | 6.2829      | 0.289956   | 0.02257   | 0.735004 |
| GOTERM CC | DIRECT GO:0016442--RISC complex                         | 6     | 0.447761 | 5.24E-04 | DICER1, I  | 1269       | 11       | 18224     | 7.833226    | 0.307197   | 0.022677  | 0.787557 |
| GOTERM CC | DIRECT GO:0015629--actin cytoskeleton                   | 30    | 2.238806 | 5.82E-04 | ABLIM1, I  | 1269       | 218      | 18224     | 1.976273    | 0.334604   | 0.023678  | 0.873795 |
| GOTERM CC | DIRECT GO:0005741--mitochondrial outer membrane         | 23    | 1.716418 | 6.39E-04 | MAVS, D    | 1269       | 149      | 18224     | 2.216785    | 0.360846   | 0.024561  | 0.959684 |
| GOTERM CC | DIRECT GO:0070578--RISC-loading complex                 | 5     | 0.373134 | 6.88E-04 | DICER1, I  | 1269       | 7        | 18224     | 10.2578     | 0.382486   | 0.025052  | 1.03315  |
| GOTERM CC | DIRECT GO:0000932--cytoplasmic mRNA processing body     | 15    | 1.119403 | 8.87E-04 | PAN3, CN   | 1269       | 78       | 18224     | 2.761714    | 0.462825   | 0.03594   | 1.329873 |
| GOTERM CC | DIRECT GO:0017053--transcriptional repressor complex    | 12    | 0.895522 | 0.001237 | TBL1XR1,   | 1269       | 55       | 18224     | 3.13329     | 0.579459   | 0.040409  | 1.848844 |
| GOTERM CC | DIRECT GO:0000139--Golgi membrane                       | 62    | 4.626866 | 0.001269 | CDIPT, PI  | 1269       | 591      | 18224     | 1.50656     | 0.588937   | 0.039604  | 1.89703  |
| GOTERM CC | DIRECT GO:0005730--nucleolus                            | 82    | 6.119403 | 0.002929 | ACOX1, Z   | 1269       | 897      | 18224     | 1.37409     | 0.871699   | 0.085408  | 4.327316 |
| GOTERM CC | DIRECT GO:0031083--BLOC-1 complex                       | 6     | 0.447761 | 0.003697 | BLOC1S4,   | 1269       | 16       | 18224     | 5.385343    | 0.925156   | 0.102386  | 5.431802 |
| GOTERM CC | DIRECT GO:0005905--clathrin-coated pit                  | 11    | 0.820896 | 0.004229 | APP, API1  | 1269       | 55       | 18224     | 2.872183    | 0.948529   | 0.111899  | 6.191501 |
| GOTERM CC | DIRECT GO:0005776--autophagosome                        | 12    | 0.895522 | 0.004336 | ORAI1, TI  | 1269       | 64       | 18224     | 2.692671    | 0.952243   | 0.110402  | 6.342737 |
| GOTERM CC | DIRECT GO:0043209--myelin sheath                        | 21    | 1.567164 | 0.00399  | LDHB, GE   | 1269       | 152      | 18224     | 1.984074    | 0.954315   | 0.108006  | 6.432158 |
| GOTERM CC | DIRECT GO:0032154--cleavage furrow                      | 10    | 0.746269 | 0.004567 | RAB11FIP   | 1269       | 47       | 18224     | 3.055514    | 0.959398   | 0.108122  | 6.669642 |
| GOTERM CC | DIRECT GO:0032588--trans-Golgi network membrane         | 14    | 1.044776 | 0.004648 | TGOLN2,    | 1269       | 83       | 18224     | 2.422323    | 0.961647   | 0.106354  | 6.784151 |
| GOTERM CC | DIRECT GO:0005813--centrosome                           | 45    | 3.358209 | 0.005606 | CEP97, KI  | 1269       | 426      | 18224     | 1.516998    | 0.980456   | 0.122931  | 8.12823  |
| GOTERM CC | DIRECT GO:0016604--nuclear body                         | 8     | 0.597015 | 0.006691 | SUMO1, N   | 1269       | 33       | 18224     | 3.481434    | 0.990902   | 0.14067   | 9.629148 |
| GOTERM CC | DIRECT GO:0015630--microtubule cytoskeleton             | 19    | 1.41791  | 0.006774 | HYPC, CK   | 1269       | 137      | 18224     | 1.99166     | 0.991414   | 0.138151  | 9.741855 |
| GOTERM CC | DIRECT GO:0030496--midbody                              | 18    | 1.343284 | 0.008106 | KIF23, TR  | 1269       | 129      | 18224     | 2.003848    | 0.996645   | 0.158563  | 11.55065 |
| GOTERM CC | DIRECT GO:0043234--protein complex                      | 43    | 3.208955 | 0.008338 | CEP97, OI  | 1269       | 412      | 18224     | 1.498833    | 0.997151   | 0.158337  | 11.86172 |
| GOTERM CC | DIRECT GO:1904115--axon cytoplasm                       | 8     | 0.597015 | 0.009331 | BLOC1S4,   | 1269       | 35       | 18224     | 3.282495    | 0.998588   | 0.170976  | 13.18452 |
| GOTERM CC | DIRECT GO:0010008--endosome membrane                    | 23    | 1.716418 | 0.009633 | ATPGV0E,   | 1269       | 185      | 18224     | 1.785411    | 0.998859   | 0.171562  | 13.58194 |
| GOTERM CC | DIRECT GO:0032587--ruffle membrane                      | 13    | 0.970149 | 0.010944 | DLC1, SPI  | 1269       | 82       | 18224     | 2.27673     | 0.999548   | 0.18794   | 15.29071 |
| GOTERM CC | DIRECT GO:0005802--trans-Golgi network                  | 18    | 1.343284 | 0.013414 | TGOLN2,    | 1269       | 136      | 18224     | 1.900709    | 0.999922   | 0.220244  | 18.42623 |
| GOTERM CC | DIRECT GO:0031252--cell leading edge                    | 8     | 0.597015 | 0.016771 | GBF1, SLI  | 1269       | 39       | 18224     | 2.945829    | 0.999993   | 0.261817  | 22.5127  |
| GOTERM CC | DIRECT GO:0005662--DNA replication factor A complex     | 5     | 0.373134 | 0.017134 | RPA2, PLI  | 1269       | 15       | 18224     | 4.786971    | 0.999994   | 0.260984  | 22.94293 |
| GOTERM CC | DIRECT GO:0000151--ubiquitin ligase complex             | 15    | 1.119403 | 0.017549 | RNF216, T  | 1269       | 108      | 18224     | 1.994571    | 0.999996   | 0.260862  | 23.43217 |
| GOTERM CC | DIRECT GO:0030670--phagocytic vesicle membrane          | 10    | 0.746269 | 0.020023 | ATPGV0E,   | 1269       | 59       | 18224     | 2.434053    | 0.999999   | 0.286166  | 26.28952 |
| GOTERM CC | DIRECT GO:0005819--spindle                              | 16    | 1.19403  | 0.020774 | KIF23, M   | 1269       | 121      | 18224     | 1.898964    | 1          | 0.289473  | 27.13703 |
| GOTERM CC | DIRECT GO:0030424--axon                                 | 25    | 1.865672 | 0.021108 | TNFRSF21   | 1269       | 222      | 18224     | 1.61722     | 1          | 0.2878    | 27.51002 |
| GOTERM CC | DIRECT GO:0042470--melanosome                           | 14    | 1.044776 | 0.022765 | HSP90AB,   | 1269       | 101      | 18224     | 1.990622    | 1          | 0.30108   | 29.33943 |
| GOTERM CC | DIRECT GO:0005801--cis-Golgi network                    | 8     | 0.597015 | 0.024572 | MPPE1, R   | 1269       | 42       | 18224     | 2.735412    | 1          | 0.315179  | 31.28447 |
| GOTERM CC | DIRECT GO:0005643--nuclear pore                         | 11    | 0.820896 | 0.026281 | MAD1L1,    | 1269       | 72       | 18224     | 2.194029    | 1          | 0.332963  | 33.63451 |
| GOTERM CC | DIRECT GO:0000790--nuclear chromatin                    | 22    | 1.641791 | 0.027766 | POLR3G, I  | 1269       | 93       | 18224     | 1.636995    | 1          | 0.336784  | 34.60063 |
| GOTERM CC | DIRECT GO:0000813--ESCRT I complex                      | 4     | 0.298507 | 0.027851 | TSV101, V  | 1269       | 10       | 18224     | 5.744366    | 1          | 0.332094  | 34.69266 |
| GOTERM CC | DIRECT GO:0031901--early endosome membrane              | 15    | 1.119403 | 0.030553 | CAV1, RA   | 1269       | 116      | 18224     | 1.857015    | 1          | 0.352358  | 37.3714  |
| GOTERM CC | DIRECT GO:0005901--caveola                              | 10    | 0.746269 | 0.035254 | DLC1, MA   | 1269       | 65       | 18224     | 2.209371    | 1          | 0.388976  | 41.79828 |
| GOTERM CC | DIRECT GO:0009986--cell surface                         | 50    | 3.731343 | 0.03531  | PVR, HSP   | 1269       | 542      | 18224     | 1.324808    | 1          | 0.38364   | 41.84905 |
| GOTERM CC | DIRECT GO:0031985--Golgi cisterna                       | 4     | 0.298507 | 0.036362 | RAB30, R   | 1269       | 11       | 18224     | 5.222151    | 1          | 0.386881  | 42.79749 |
| GOTERM CC | DIRECT GO:0042612--MHC class I protein complex          | 4     | 0.298507 | 0.036362 | HLA-A, H   | 1269       | 11       | 18224     | 5.222151    | 1          | 0.386881  | 42.79749 |
| GOTERM CC | DIRECT GO:1990316--ATG1/ULK1 kinase complex             | 3     | 0.223881 | 0.041998 | ULK1, RB   | 1269       | 5        | 18224     | 8.616548    | 1          | 0.426604  | 47.64048 |
| GOTERM CC | DIRECT GO:0005874--microtubule                          | 31    | 2.313433 | 0.043626 | KIF23, DY  | 1269       | 311      | 18224     | 1.431474    | 1          | 0.433181  | 48.96661 |
| GOTERM CC | DIRECT GO:0005844--polysome                             | 7     | 0.522388 | 0.045697 | EIF4H, EII | 1269       | 38       | 18224     | 2.645432    | 1          | 0.442713  | 50.60796 |
| GOTERM CC | DIRECT GO:0005667--transcription factor complex         | 21    | 1.567164 | 0.048124 | E2F2, E2F  | 1269       | 193      | 18224     | 1.562587    | 1          | 0.454302  | 52.4687  |
| GOTERM CC | DIRECT GO:0000792--heterochromatin                      | 5     | 0.373134 | 0.053997 | SUMO1, N   | 1269       | 21       | 18224     | 3.419265    | 1          | 0.488261  | 56.70423 |
| GOTERM CC | DIRECT GO:0005721--pericentric heterochromatin          | 4     | 0.298507 | 0.056834 | DNMT3, C   | 1269       | 13       | 18224     | 4.418743    | 1          | 0.500539  | 58.62188 |
| GOTERM CC | DIRECT GO:0005739--mitochondrion                        | 108   | 8.059701 | 0.059609 | HCCS, LD   | 1269       | 1331     | 18224     | 1.165273    | 1          | 0.511802  | 60.42036 |
| GOTERM CC | DIRECT GO:0001940--male pronucleus                      | 3     | 0.223881 | 0.060132 | TET3, CB   | 1269       | 6        | 18224     | 7.180457    | 1          | 0.50917   | 60.75077 |
| GOTERM CC | DIRECT GO:0035749--myelin sheath adaxonal region        | 3     | 0.223881 | 0.060132 | STX4, MP   | 1269       | 6        | 18224     | 7.180457    | 1          | 0.50917   | 60.75077 |
| GOTERM CC | DIRECT GO:0070062--extracellular exosome                | 216   | 16.1194  | 0.062468 | PVR, LDH   | 1269       | 2811     | 18224     | 1.103507    | 1          | 0.517262  | 62.19666 |
| GOTERM CC | DIRECT GO:0005720--nuclear heterochromatin              | 5     | 0.373134 | 0.062499 | CBX3, FO   | 1269       | 22       | 18224     | 3.263844    | 1          | 0.511824  | 62.21512 |
| GOTERM CC | DIRECT GO:0072686--mitotic spindle                      | 7     | 0.522388 | 0.062541 | KIF23, M   | 1269       | 41       | 18224     | 2.451863    | 1          | 0.506568  | 62.24091 |
| GOTERM CC | DIRECT GO:0005765--lysosomal membrane                   | 27    | 2.014925 | 0.066776 | HSP90AB,   | 1269       | 274      | 18224     | 1.415127    | 1          | 0.524917  | 64.7332  |
| GOTERM CC | DIRECT GO:0000974--Prp19 complex                        | 4     | 0.298507 | 0.068712 | PLRG1, IS  | 1269       | 14       | 18224     | 4.103118    | 1          | 0.529994  | 65.82035 |
| GOTERM CC | DIRECT GO:0090575--RNA polymerase II transcription fact | 6     | 0.447761 | 0.075873 | NONO, HI   | 1269       | 33       | 18224     | 2.611075    | 1          | 0.561495  | 69.57608 |
| GOTERM CC | DIRECT GO:0005739--mitochondrion                        | 13    | 0.970149 | 0.080372 | AP1G1, R   | 1269       | 110      | 18224     | 1.697199    | 1          | 0.577894  | 71.73482 |
| GOTERM CC | DIRECT GO:0000779--condensed chromosome, centromeric    | 3     | 0.223881 | 0.080381 | CBX3, AU   | 1269       | 7        | 18224     | 6.154677    | 1          | 0.572629  | 71.73917 |
| GOTERM CC | DIRECT GO:0045121--membrane raft                        | 21    | 1.567164 | 0.082077 | LDHB, CA   | 1269       | 206      | 18224     | 1.463977    | 1          | 0.575322  | 72.51525 |
| GOTERM CC | DIRECT GO:0045171--intercellular bridge                 | 7     | 0.522388 | 0.082593 | KIF23, SP  | 1269       | 44       | 18224     | 2.284691    | 1          | 0.572543  | 72.74725 |
| GOTERM CC | DIRECT GO:0055038--recycling endosome membrane          | 7     | 0.522388 | 0.082593 | RAB11FIP   | 1269       | 44       | 18224     | 2.284691    | 1          | 0.5       |          |

| Category | Term                                               | Count | %        | PValue   | Genes     | List Total | Pop Hits | Pop Total | Fold Enric | Bonferroni | Benjamini | FDR      |
|----------|----------------------------------------------------|-------|----------|----------|-----------|------------|----------|-----------|------------|------------|-----------|----------|
| GOTERM   | GO:0005515~protein binding                         | 804   | 60       | 1.79E-24 | LDHB, CF  | 1221       | 8785     | 16881     | 1.26531    | 2.22E-21   | 2.22E-21  | 2.90E-21 |
| GOTERM   | GO:0031625~ubiquitin protein ligase binding        | 48    | 3.58209  | 1.01E-07 | TRIOBP, I | 1221       | 287      | 16881     | 2.312288   | 1.26E-04   | 6.29E-05  | 1.64E-04 |
| GOTERM   | GO:0019901~protein kinase binding                  | 54    | 4.029851 | 2.09E-06 | E2F1, HSF | 1221       | 376      | 16881     | 1.985585   | 0.002598   | 8.67E-04  | 0.003393 |
| GOTERM   | GO:0004672~protein kinase activity                 | 52    | 3.880597 | 2.58E-06 | CDK19, N  | 1221       | 359      | 16881     | 2.002587   | 0.003212   | 8.04E-04  | 0.004197 |
| GOTERM   | GO:0044822~poly(A) RNA binding                     | 119   | 8.880597 | 2.50E-05 | MKRN1, I  | 1221       | 1129     | 16881     | 1.457255   | 0.030688   | 0.006214  | 0.040651 |
| GOTERM   | GO:0004674~protein serine/threonine kinase activit | 50    | 3.731343 | 4.18E-05 | CDK19, N  | 1221       | 376      | 16881     | 1.838504   | 0.050744   | 0.008642  | 0.06791  |
| GOTERM   | GO:0008134~transcription factor binding            | 39    | 2.910448 | 1.69E-04 | E2F1, E2F | 1221       | 284      | 16881     | 1.898579   | 0.189492   | 0.029568  | 0.273688 |
| GOTERM   | GO:0003700~transcription factor activity, sequence | 100   | 7.462687 | 1.95E-04 | REST, RO  | 1221       | 961      | 16881     | 1.438663   | 0.215942   | 0.029951  | 0.316841 |
| GOTERM   | GO:0003677~DNA binding                             | 158   | 11.79104 | 3.16E-04 | BBX, INO  | 1221       | 1674     | 16881     | 1.304921   | 0.325188   | 0.042761  | 0.511764 |
| GOTERM   | GO:0042826~histone deacetylase binding             | 19    | 1.41791  | 3.44E-04 | HSP90AB   | 1221       | 102      | 16881     | 2.575348   | 0.348678   | 0.041969  | 0.557734 |
| GOTERM   | GO:0046872~metal ion binding                       | 189   | 14.10448 | 4.07E-04 | HCCS, MF  | 1221       | 2069     | 16881     | 1.262943   | 0.397438   | 0.045007  | 0.658622 |
| GOTERM   | GO:0004842~ubiquitin-protein transferase activity  | 42    | 3.134328 | 4.43E-04 | MKRN1, I  | 1221       | 329      | 16881     | 1.764964   | 0.423709   | 0.04489   | 0.716375 |
| GOTERM   | GO:0019903~protein phosphatase binding             | 14    | 1.044776 | 4.80E-04 | HMGB2, H  | 1221       | 63       | 16881     | 3.072545   | 0.450066   | 0.044955  | 0.776987 |
| GOTERM   | GO:0046332~SMAD binding                            | 11    | 0.820896 | 7.95E-04 | ACVR1B,   | 1221       | 43       | 16881     | 3.536769   | 0.62867    | 0.068316  | 1.283985 |
| GOTERM   | GO:0005524~ATP binding                             | 140   | 10.44776 | 0.001029 | DYNCL1L   | 1221       | 1495     | 16881     | 1.294701   | 0.722319   | 0.081872  | 1.65751  |
| GOTERM   | GO:0004702~receptor signaling protein serine/thre  | 12    | 0.895522 | 0.00122  | PAK6, AC  | 1221       | 53       | 16881     | 3.130314   | 0.781205   | 0.090605  | 1.962789 |
| GOTERM   | GO:0042802~identical protein binding               | 77    | 5.746269 | 0.001606 | CEP72, LI | 1221       | 749      | 16881     | 1.421319   | 0.864743   | 0.111021  | 2.575953 |
| GOTERM   | GO:0001047~core promoter binding                   | 13    | 0.970149 | 0.001886 | E2F1, NOI | 1221       | 64       | 16881     | 2.808315   | 0.904651   | 0.122402  | 3.019274 |
| GOTERM   | GO:0098641~cadherin binding involved in cell-cell  | 36    | 2.686567 | 0.001948 | HSP90AB   | 1221       | 290      | 16881     | 1.716276   | 0.911785   | 0.119961  | 3.117614 |
| GOTERM   | GO:0003707~steroid hormone receptor activity       | 12    | 0.895522 | 0.001953 | NR1H2, P  | 1221       | 56       | 16881     | 2.962618   | 0.912324   | 0.114591  | 3.125361 |
| GOTERM   | GO:0003682~chromatin binding                       | 45    | 3.358209 | 0.002277 | MORF4L1   | 1221       | 391      | 16881     | 1.591176   | 0.941466   | 0.126415  | 3.634591 |
| GOTERM   | GO:0000981~RNA polymerase II transcription fact    | 24    | 1.791045 | 0.002862 | ZMYM1, I  | 1221       | 171      | 16881     | 1.940428   | 0.971802   | 0.149732  | 4.548332 |
| GOTERM   | GO:0003727~single-stranded RNA binding             | 10    | 0.746269 | 0.003134 | HMGB1, I  | 1221       | 43       | 16881     | 3.215245   | 0.979929   | 0.15628   | 4.970748 |
| GOTERM   | GO:0004709~MAP kinase kinase kinase activity       | 7     | 0.522388 | 0.003838 | MAP3K5,   | 1221       | 22       | 16881     | 4.39904    | 0.991671   | 0.18086   | 6.054782 |
| GOTERM   | GO:0070411~I-SMAD binding                          | 5     | 0.373134 | 0.005934 | SMAD7, S  | 1221       | 11       | 16881     | 6.284342   | 0.999394   | 0.25649   | 9.21291  |
| GOTERM   | GO:0043130~ubiquitin binding                       | 13    | 0.970149 | 0.009856 | ADRM1, I  | 1221       | 78       | 16881     | 2.304259   | 0.999996   | 0.377667  | 14.85877 |
| GOTERM   | GO:0001046~core promoter sequence-specific DN      | 9     | 0.671642 | 0.010889 | USP3, KLI | 1221       | 43       | 16881     | 2.89372    | 0.999999   | 0.396422  | 16.29094 |
| GOTERM   | GO:0004725~protein tyrosine phosphatase activity   | 15    | 1.119403 | 0.012626 | SSH2, PT  | 1221       | 100      | 16881     | 2.073833   | 1          | 0.431622  | 18.64571 |
| GOTERM   | GO:0042803~protein homodimerization activity       | 70    | 5.223881 | 0.012794 | PVR, GRP  | 1221       | 730      | 16881     | 1.325738   | 1          | 0.424667  | 18.87069 |
| GOTERM   | GO:0004879~RNA polymerase II transcription fact    | 8     | 0.597015 | 0.01326  | NR1H2, P  | 1221       | 36       | 16881     | 3.072345   | 1          | 0.425342  | 19.49063 |
| GOTERM   | GO:0017048~Rho GTPase binding                      | 7     | 0.522388 | 0.013372 | FMN1B, F  | 1221       | 28       | 16881     | 3.456388   | 1          | 0.417639  | 19.63874 |
| GOTERM   | GO:0035035~histone acetyltransferase binding       | 7     | 0.522388 | 0.013372 | ZBTB7A,   | 1221       | 28       | 16881     | 3.456388   | 1          | 0.417639  | 19.63874 |
| GOTERM   | GO:0002134~UTP binding                             | 3     | 0.223881 | 0.014904 | HSP90AB   | 1221       | 3        | 16881     | 13.82555   | 1          | 0.442461  | 21.64133 |
| GOTERM   | GO:0017098~sulfonurylurea receptor binding         | 3     | 0.223881 | 0.014904 | HSP90AB   | 1221       | 3        | 16881     | 13.82555   | 1          | 0.442461  | 21.64133 |
| GOTERM   | GO:0004713~protein tyrosine kinase activity        | 18    | 1.343284 | 0.015343 | TWF1, NR  | 1221       | 133      | 16881     | 1.871127   | 1          | 0.441971  | 22.20684 |
| GOTERM   | GO:0019904~protein domain specific binding         | 25    | 1.865672 | 0.01551  | HMGB2, I  | 1221       | 208      | 16881     | 1.661725   | 1          | 0.435816  | 22.42001 |
| GOTERM   | GO:0035197~siRNA binding                           | 4     | 0.298507 | 0.016007 | DICER1, M | 1221       | 8        | 16881     | 6.912776   | 1          | 0.436725  | 23.05378 |
| GOTERM   | GO:0019899~enzyme binding                          | 36    | 2.686567 | 0.016436 | CDK19, A  | 1221       | 333      | 16881     | 1.494654   | 1          | 0.43625   | 23.59753 |
| GOTERM   | GO:0001228~transcriptional activator activity, RN  | 14    | 1.044776 | 0.018935 | MAFB, TF  | 1221       | 95       | 16881     | 2.03745    | 1          | 0.474423  | 26.68995 |
| GOTERM   | GO:0001077~transcriptional activator activity, RN  | 27    | 2.014925 | 0.020845 | CAMTA1,   | 1221       | 236      | 16881     | 1.581737   | 1          | 0.49851   | 28.97359 |
| GOTERM   | GO:0004675~transmembrane receptor protein serin    | 4     | 0.298507 | 0.022737 | ACVR1B,   | 1221       | 9        | 16881     | 6.14469    | 1          | 0.520112  | 31.16946 |
| GOTERM   | GO:0034713~type I transforming growth factor bet   | 4     | 0.298507 | 0.022737 | SMAD7, S  | 1221       | 9        | 16881     | 6.14469    | 1          | 0.520112  | 31.16946 |
| GOTERM   | GO:0032403~protein complex binding                 | 24    | 1.791045 | 0.024821 | RWY1, UC  | 1221       | 206      | 16881     | 1.610744   | 1          | 0.542651  | 33.51548 |
| GOTERM   | GO:0003723~RNA binding                             | 53    | 3.955224 | 0.02564  | TALF1, RF | 1221       | 547      | 16881     | 1.339587   | 1          | 0.545581  | 34.41634 |
| GOTERM   | GO:0051082~unfolded protein binding                | 15    | 1.119403 | 0.027043 | PTGES3, I | 1221       | 110      | 16881     | 1.885303   | 1          | 0.556325  | 35.9331  |
| GOTERM   | GO:0051434~BH3 domain binding                      | 3     | 0.223881 | 0.028383 | MCL1, BA  | 1221       | 4        | 16881     | 10.36916   | 1          | 0.56555   | 37.35139 |
| GOTERM   | GO:0004843~thiol-dependent ubiquitin-specific pr   | 12    | 0.895522 | 0.028485 | OTUD4, C  | 1221       | 80       | 16881     | 2.073833   | 1          | 0.558559  | 37.4586  |
| GOTERM   | GO:0051015~actin filament binding                  | 17    | 1.268657 | 0.028644 | TRIOBP, I | 1221       | 132      | 16881     | 1.780564   | 1          | 0.552489  | 37.6241  |
| GOTERM   | GO:0003725~double-stranded RNA binding             | 10    | 0.746269 | 0.030263 | HSP90AB   | 1221       | 61       | 16881     | 2.266484   | 1          | 0.564703  | 39.29145 |
| GOTERM   | GO:0003743~translation initiation factor activity  | 10    | 0.746269 | 0.030263 | E1F4G2, R | 1221       | 61       | 16881     | 2.266484   | 1          | 0.564703  | 39.29145 |
| GOTERM   | GO:0005086~ARF guanyl-nucleotide exchange fac      | 6     | 0.447761 | 0.03087  | GBL1, FN  | 1221       | 25       | 16881     | 3.318133   | 1          | 0.564215  | 39.90524 |
| GOTERM   | GO:0017137~Rab GTPase binding                      | 17    | 1.268657 | 0.032366 | TBC1D2B   | 1221       | 134      | 16881     | 1.753988   | 1          | 0.574022  | 41.39413 |
| GOTERM   | GO:0003684~damaged DNA binding                     | 10    | 0.746269 | 0.036368 | HMGB1, I  | 1221       | 63       | 16881     | 2.194532   | 1          | 0.609866  | 45.20931 |
| GOTERM   | GO:0008301~DNA binding, bending                    | 5     | 0.373134 | 0.036727 | TFAM, HN  | 1221       | 18       | 16881     | 3.840431   | 1          | 0.606122  | 45.53974 |
| GOTERM   | GO:0000978~RNA polymerase II core promoter pr      | 36    | 2.686567 | 0.037871 | ZNF805, F | 1221       | 355      | 16881     | 1.402028   | 1          | 0.610336  | 46.5813  |
| GOTERM   | GO:0042056~chemoattractant activity                | 6     | 0.447761 | 0.041665 | HMGB1, I  | 1221       | 27       | 16881     | 3.072345   | 1          | 0.639022  | 49.90126 |
| GOTERM   | GO:0051721~protein phosphatase 2A binding          | 6     | 0.447761 | 0.041665 | E1F4EBP1  | 1221       | 27       | 16881     | 3.072345   | 1          | 0.639022  | 49.90126 |
| GOTERM   | GO:0005525~GTP binding                             | 38    | 2.835821 | 0.04488  | HSP90AB   | 1221       | 384      | 16881     | 1.368154   | 1          | 0.65994   | 52.56162 |
| GOTERM   | GO:0015057~thrombin receptor activity              | 3     | 0.223881 | 0.045058 | F2RL3, F2 | 1221       | 5        | 16881     | 8.295332   | 1          | 0.654571  | 52.70536 |
| GOTERM   | GO:0043621~protein self-association                | 8     | 0.597015 | 0.045659 | ATXN1, C  | 1221       | 46       | 16881     | 2.404444   | 1          | 0.652812  | 53.18638 |
| GOTERM   | GO:0031267~small GTPase binding                    | 5     | 0.373134 | 0.051891 | GD12, RC  | 1221       | 20       | 16881     | 3.456388   | 1          | 0.694147  | 57.91149 |
| GOTERM   | GO:0005102~receptor binding                        | 35    | 2.61194  | 0.052863 | PVR, GLC  | 1221       | 353      | 16881     | 1.370806   | 1          | 0.694644  | 58.60702 |
| GOTERM   | GO:0042169~SH2 domain binding                      | 6     | 0.447761 | 0.054474 | DLC1, LA  | 1221       | 29       | 16881     | 2.860459   | 1          | 0.69952   | 59.73598 |
| GOTERM   | GO:0003713~transcription coactivator activity      | 26    | 1.940299 | 0.057217 | TDRD3, P  | 1221       | 248      | 16881     | 1.449453   | 1          | 0.711564  | 61.59115 |
| GOTERM   | GO:0044212~transcription regulatory region DNA     | 23    | 1.716418 | 0.057441 | TBL1XR1   | 1221       | 213      | 16881     | 1.4929     | 1          | 0.70698   | 61.73972 |
| GOTERM   | GO:0001227~transcriptional repressor activity, RN  | 9     | 0.671642 | 0.060781 | ZNF280B,  | 1221       | 59       | 16881     | 2.108983   | 1          | 0.721916  | 63.88281 |
| GOTERM   | GO:1990226~histone methyltransferase binding       | 3     | 0.223881 | 0.064397 | HSP90AB   | 1221       | 6        | 16881     | 6.912776   | 1          | 0.737277  | 66.07624 |
| GOTERM   | GO:0032947~protein complex scaffold                | 7     | 0.522388 | 0.065667 | ISCU, CA  | 1221       | 40       | 16881     | 2.419472   | 1          | 0.738748  | 66.81606 |
| GOTERM   | GO:0003697~single-stranded DNA binding             | 12    | 0.895522 | 0.071705 | PRIM1, HI | 1221       | 93       | 16881     | 1.783942   | 1          | 0.764824  | 70.1326  |
| GOTERM   | GO:0046934~phosphatidylinositol-4,5-bisphosphat    | 9     | 0.671642 | 0.07692  | NRG4, FG  | 1221       | 62       | 16881     | 2.006935   | 1          | 0.784127  | 72.7441  |
| GOTERM   | GO:0046982~protein heterodimerization activity     | 43    | 3.208955 | 0.079132 | CAV1, PP  | 1221       | 465      | 16881     | 1.278492   | 1          | 0.788828  | 73.78545 |
| GOTERM   | GO:0008270~zinc ion binding                        | 98    | 7.313433 | 0.083019 | MKRN1, I  | 1221       | 1169     | 16881     | 1.159028   | 1          | 0.800208  | 75.52594 |
| GOTERM   | GO:0043565~sequence-specific DNA binding           | 47    | 3.507463 | 0.085697 | E2F1, BAC | 1221       | 518      | 16881     | 1.254442   | 1          | 0.806089  | 76.66158 |
| GOTERM   | GO:0004703~G-protein coupled receptor kinase act   | 3     | 0.223881 | 0.085929 | GRK7, GR  | 1221       | 7        | 16881     | 5.925237   | 1          | 0.802331  | 76.75757 |
| GOTERM   | GO:0001222~transcription corepressor binding       | 3     | 0.223881 | 0.085929 | HDGF, RC  | 1221       | 7        | 16881     | 5.925237   | 1          | 0.802331  | 76.7575  |
