# Supplementary material for: Integrated MicroRNA Expression Profile Reveals Dysregulated miR-20a-5p and miR-200a-3p in Liver Fibrosis
Source: PubMed Central journal article supplement (PMC8218919; doi:10.1155/2021/9583932), 2021-06-08
Supplement: 9583932.f4.pdf [file 9583932.f4.pdf]

| Category     | Term                                                                  | Count | %        | PValue   | Genes                                                  | List Total | Pop Hits | Pop Total | Fold Enrich | Bonferroni | Benjamini | FDR      |
|--------------|-----------------------------------------------------------------------|-------|----------|----------|--------------------------------------------------------|------------|----------|-----------|-------------|------------|-----------|----------|
| KEGG PATHWAY | hsa05206:MicroRNAs in cancer                                          | 43    | 9.287257 | 3.45E-17 | BM11, E2F3, CYP1B1, MCL1, GRB2, EZH2, DICER1, ZE       | 225        | 286      | 6879      | 4.59669     | 7.49E-15   | 7.49E-15  | 4.38E-14 |
| KEGG PATHWAY | hsa05215:Prostate cancer                                              | 21    | 4.535637 | 3.34E-12 | EGFR, E2F3, GRB2, CREB1, TP53, FOXO1, CREB5, PTI       | 225        | 88       | 6879      | 7.295909    | 7.25E-10   | 3.63E-10  | 4.25E-09 |
| KEGG PATHWAY | hsa04068:FoxO signaling pathway                                       | 24    | 5.183585 | 3.64E-11 | EGFR, ATF2, GRB2, SMAD4, SMAD3, FOXO1, SMAD            | 225        | 134      | 6879      | 5.475821    | 7.90E-09   | 2.63E-09  | 4.62E-08 |
| KEGG PATHWAY | hsa05200:Pathways in cancer                                           | 41    | 8.855292 | 5.62E-11 | GNA13, E2F3, WNT16, XIAP, GRB2, FGF9, ADCY6, MI        | 225        | 393      | 6879      | 3.189584    | 1.22E-08   | 3.05E-09  | 7.14E-08 |
| KEGG PATHWAY | hsa05205:Proteoglycans in cancer                                      | 27    | 5.831533 | 1.07E-09 | WNT16, GRB2, PDCD4, CTNBN1, TGFB2, WNT1, IGF1          | 225        | 200      | 6879      | 4.1274      | 2.32E-07   | 4.65E-08  | 1.30E-06 |
| KEGG PATHWAY | hsa04722:Neurotrophin signaling pathway                               | 20    | 4.319654 | 8.14E-09 | GRB2, TP53, FOXO3, IRS1, PDK1, BDNF, CRKL, KRA         | 225        | 120      | 6879      | 5.095556    | 1.77E-06   | 2.94E-07  | 1.03E-05 |
| KEGG PATHWAY | hsa05166:HTLV-1 infection                                             | 28    | 6.047516 | 4.20E-08 | WNT16, E2F3, XIAP, ADCY6, CHEK2, SRF, ATF1, CTN        | 225        | 254      | 6879      | 3.702899    | 9.12E-06   | 1.30E-06  | 5.34E-05 |
| KEGG PATHWAY | hsa04151:PI3K-Akt signaling pathway                                   | 33    | 7.127243 | 5.75E-08 | PHLPP1, MCL1, FGF9, GRB2, FOXO3, PTEN, CCNE2, I        | 225        | 345      | 6879      | 2.924406    | 1.25E-05   | 1.56E-06  | 7.31E-05 |
| KEGG PATHWAY | hsa04510:Focal adhesion                                               | 24    | 5.183585 | 1.87E-07 | EGFR, FLT1, XIAP, ACTN4, ROCK2, GRB2, HGF, PTEN        | 225        | 206      | 6879      | 3.561942    | 4.06E-05   | 4.51E-06  | 2.38E-04 |
| KEGG PATHWAY | hsa04520:Adherens junction                                            | 14    | 3.023758 | 3.56E-07 | EGFR, WASH3, ACTN4, SMAD4, SMAD3, SMAD2, SN/           | 225        | 71       | 6879      | 6.028545    | 7.73E-05   | 7.73E-06  | 4.52E-04 |
| KEGG PATHWAY | hsa05210:Colorectal cancer                                            | 13    | 2.807775 | 5.42E-07 | KRAS, JUN, BCL2, GSK3B, TP53, SMAD4, RHOA, SMA         | 225        | 62       | 6879      | 6.410538    | 1.18E-04   | 1.07E-05  | 6.89E-04 |
| KEGG PATHWAY | hsa05213:Endometrial cancer                                           | 12    | 2.591793 | 6.36E-07 | EGFR, PDPK1, KRAS, GRB2, GSK3B, TP53, FOXO3, PT        | 225        | 52       | 6879      | 7.053585    | 1.38E-04   | 1.15E-05  | 8.08E-04 |
| KEGG PATHWAY | hsa05161:Hepatitis B                                                  | 19    | 4.103672 | 9.08E-07 | E2F3, GRB2, TBK1, CREB1, TP53, SMAD4, CDK6, CRE        | 225        | 145      | 6879      | 4.006161    | 1.97E-04   | 1.52E-05  | 0.001153 |
| KEGG PATHWAY | hsa04115:p53 signaling pathway                                        | 13    | 2.807775 | 1.30E-06 | ZMAT3, TP53, CDK6, CHEK2, PMAIP1, SESN2, PTEN, :       | 225        | 67       | 6879      | 5.932139    | 2.83E-04   | 2.02E-05  | 0.001655 |
| KEGG PATHWAY | hsa05212:Pancreatic cancer                                            | 12    | 2.591793 | 6.49E-06 | EGFR, KRAS, VEGFA, TP53, SMAD4, SMAD3, S/              | 225        | 65       | 6879      | 5.643308    | 0.001407   | 9.39E-05  | 0.008241 |
| KEGG PATHWAY | hsa04110:Cell cycle                                                   | 16    | 3.455724 | 1.05E-05 | E2F3, CDC14B, TP53, SMAD4, SMAD3, CDK6, SMAD2          | 225        | 124      | 6879      | 3.944946    | 0.002269   | 1.42E-04  | 0.013295 |
| KEGG PATHWAY | hsa05220:Chronic myeloid leukemia                                     | 12    | 2.591793 | 1.79E-05 | CDKN1A, E2F3, CDKN1B, KRAS, CRKL, GRB2, TP53, :        | 225        | 72       | 6879      | 5.095556    | 0.003882   | 2.29E-04  | 0.022764 |
| KEGG PATHWAY | hsa04012:Erbb signaling pathway                                       | 13    | 2.807775 | 2.17E-05 | EGFR, GRB2, BTC, CDKN1A, CRKL, KRAS, CDKN1B, I,        | 225        | 87       | 6879      | 4.568429    | 0.004692   | 2.61E-04  | 0.027522 |
| KEGG PATHWAY | hsa05214:Glioma                                                       | 11    | 2.37581  | 4.08E-05 | EGFR, IGF1R, CDKN1A, E2F3, KRAS, PLCG1, GRB2, T/       | 225        | 65       | 6879      | 5.173949    | 0.008814   | 4.66E-04  | 0.051806 |
| KEGG PATHWAY | hsa04014:Ras signaling pathway                                        | 21    | 4.535637 | 4.18E-05 | EGFR, PLD1, FLT1, RAB5B, FGF9, GRB2, TBK1, HGF, I      | 225        | 226      | 6879      | 2.840885    | 0.009028   | 4.53E-04  | 0.053609 |
| KEGG PATHWAY | hsa04066:HLF-1 signaling pathway                                      | 13    | 2.807775 | 5.89E-05 | EGFR, FLT1, PKFB3, MKNK2, STAT3, IGF1R, CDKN1,         | 225        | 96       | 6879      | 4.140139    | 0.012706   | 6.09E-04  | 0.070419 |
| KEGG PATHWAY | hsa04919:Thyroid hormone signaling pathway                            | 14    | 3.023758 | 8.42E-05 | NOTCH2, PDPK1, NOTCH1, KRAS, NCOA2, EP300, TH          | 225        | 115      | 6879      | 3.721971    | 0.018098   | 8.30E-04  | 0.106843 |
| KEGG PATHWAY | hsa05218:Melanoma                                                     | 11    | 2.37581  | 8.87E-05 | EGFR, IGF1R, CDKN1A, E2F3, KRAS, FGF9, MIF, TP5        | 225        | 71       | 6879      | 4.736714    | 0.019064   | 8.37E-04  | 0.1126   |
| KEGG PATHWAY | hsa04390:Hippo signaling pathway                                      | 16    | 3.455724 | 1.08E-04 | PARP6B, WNT1, WNT16, CCND2, GSK3B, SMAD4, S/           | 225        | 151      | 6879      | 3.239558    | 0.023236   | 9.79E-04  | 0.137516 |
| KEGG PATHWAY | hsa05203:Viral carcinogenesis                                         | 19    | 4.103672 | 1.13E-04 | VAC14, ACTN4, GRB2, CREB1, TP53, CDK6, CREB5, P        | 225        | 205      | 6879      | 2.833626    | 0.024307   | 9.84E-04  | 0.143925 |
| KEGG PATHWAY | hsa04015:Rap1 signaling pathway                                       | 19    | 4.103672 | 1.54E-04 | EGFR, PARP6B, FLT1, FGF9, ADCY6, HGF, EphA2, KI        | 225        | 210      | 6879      | 2.766159    | 0.032943   | 0.001288  | 0.198784 |
| KEGG PATHWAY | hsa04550:Signaling pathways regulating pluripotency                   | 15    | 3.239741 | 1.71E-04 | BM11, WNT16, GRB2, SMAD4, SMAD3, SMAD2, STAT           | 225        | 140      | 6879      | 3.275714    | 0.036524   | 0.001377  | 0.217545 |
| KEGG PATHWAY | hsa04211:Renal cell carcinoma                                         | 10    | 2.159827 | 2.58E-04 | KRAS, ERK1, CDKN1A, E2F3, GRB2, ETS1, JUN, VEGFA       | 225        | 66       | 6879      | 4.632233    | 0.054379   | 0.001995  | 0.236732 |
| KEGG PATHWAY | hsa05223:Non-small cell lung cancer                                   | 9     | 1.943844 | 4.11E-04 | EGFR, PDPK1, E2F3, KRAS, PLCG1, GRB2, TP53, CDK/       | 225        | 56       | 6879      | 4.913571    | 0.083539   | 0.003072  | 0.520873 |
| KEGG PATHWAY | hsa04916:Melanocyte differentiation                                   | 11    | 2.37581  | 0.00146  | WNT1, WNT16, EP300, PAK2, MAPK14, JUN, G/              | 225        | 100      | 6879      | 3.630607    | 0.271694   | 0.010512  | 1.838524 |
| KEGG PATHWAY | hsa04660:T cell receptor signaling pathway                            | 11    | 2.37581  | 0.00146  | PDPK1, KRAS, PAK2, PLCG1, GRB2, MAPK14, JUN, G/        | 225        | 100      | 6879      | 3.630607    | 0.271694   | 0.010512  | 1.838524 |
| KEGG PATHWAY | hsa04320:Dorso-ventral axis formation                                 | 6     | 1.295896 | 0.001572 | EGFR, NOTCH2, NOTCH1, KRAS, GRB2, ETS1                 | 225        | 27       | 6879      | 6.794074    | 0.289273   | 0.010955  | 1.978809 |
| KEGG PATHWAY | hsa05222:Small cell lung cancer                                       | 10    | 2.159827 | 0.001678 | CCNE2, E2F3, CDKN1A, XIAP, BCL2, TP53, CDK6, IKB       | 225        | 85       | 6879      | 3.596863    | 0.305456   | 0.011326  | 2.110865 |
| KEGG PATHWAY | hsa04310:Wnt signaling pathway                                        | 13    | 2.807775 | 0.001724 | WNT1, WNT16, EP300, CCND2, PAK2, MAPK14, JUN, GSK3B, ' | 225        | 138      | 6879      | 2.880097    | 0.312343   | 0.011283  | 2.167945 |
| KEGG PATHWAY | hsa05219:Bladder cancer                                               | 7     | 1.511879 | 0.001929 | EGFR, CDKN1A, E2F3, KRAS, VEGFA, TP53, THBS1           | 225        | 41       | 6879      | 5.218397    | 0.342348   | 0.01225   | 2.423085 |
| KEGG PATHWAY | hsa05291:Insulin resistance                                           | 11    | 2.37581  | 0.002605 | PDPK1, CREB1, GSK3B, FOXO1, CREB5, PRKAA2, OG          | 225        | 108      | 6879      | 3.113951    | 0.43221    | 0.016041  | 3.258615 |
| KEGG PATHWAY | hsa04810:Regulation of actin cytoskeleton                             | 16    | 3.455724 | 0.003434 | EGFR, GNA13, ACTN4, ROCK2, FGF9, ABI2, PFN1, CR        | 225        | 210      | 6879      | 3.239397    | 0.526006   | 0.020254  | 4.276505 |
| KEGG PATHWAY | hsa04010:MAPK signaling pathway                                       | 18    | 3.887689 | 0.003526 | EGFR, GRB2, CACNG8, FGF9, MKNK2, TP53, SRF, TG/        | 225        | 253      | 6879      | 2.175178    | 0.535396   | 0.020505  | 4.387657 |
| KEGG PATHWAY | hsa05100:Bacterial invasion of epithelial cell                        | 9     | 1.943844 | 0.003677 | CRKL, ARPC3, RHOA, SHC1, ELMO2, CTNNA3, SEPT/          | 225        | 78       | 6879      | 3.527692    | 0.550344   | 0.020814  | 4.570497 |
| KEGG PATHWAY | hsa04390:Hippo signaling pathway                                      | 10    | 2.159827 | 0.004766 | EGFR, KRAS, SP1, FKBP5, GRB2, JUN, CREB1, ADCY/        | 225        | 99       | 6879      | 3.088215    | 0.645401   | 0.026234  | 5.887866 |
| KEGG PATHWAY | hsa04910:Insulin signaling pathway                                    | 12    | 2.591793 | 0.005199 | PDPK1, KRAS, CRKL, GRB2, GSK3B, FLOT1, MKNK2,          | 225        | 138      | 6879      | 2.658551    | 0.677313   | 0.027881  | 6.405906 |
| KEGG PATHWAY | hsa04071:Sphingolipid signaling pathway                               | 11    | 2.37581  | 0.005567 | GNA13, PLD1, PDPK1, KRAS, RHOA, ROCK2, MAPK14, ACER    | 225        | 120      | 6879      | 2.802556    | 0.702234   | 0.02915   | 6.845182 |
| KEGG PATHWAY | hsa04350:TGF-beta signaling pathway                                   | 9     | 1.943844 | 0.005789 | ACVR1B, EP300, SP1, SMAD4, RHOA, SMAD3, SMAD           | 225        | 84       | 6879      | 3.275714    | 0.7163     | 0.029551  | 7.108655 |
| KEGG PATHWAY | hsa05130:Pathogenesis of Escherichia coli infection                   | 7     | 1.511879 | 0.0059   | TUBB, ARPC3, TUBB2A, ROCK2, RHOA, TUBA1B, CT           | 225        | 51       | 6879      | 4.19634     | 0.723109   | 0.029422  | 7.240654 |
| KEGG PATHWAY | hsa05218:Melanocyte differentiation                                   | 11    | 2.37581  | 0.006249 | CDKN1A, CDKN1B, PSMD11, TBK1, MAPK14, JUN, B/          | 225        | 122      | 6879      | 2.756612    | 0.743405   | 0.030442  | 7.653032 |
| KEGG PATHWAY | hsa04152:AMPK signaling pathway                                       | 11    | 2.37581  | 0.006613 | IGF1R, PDPK1, PKFB3, CREB1, FOXO1, CREB5, CAB          | 225        | 123      | 6879      | 2.734201    | 0.763034   | 0.03149   | 8.082188 |
| KEGG PATHWAY | hsa04540:Gap junction                                                 | 9     | 1.943844 | 0.007642 | EGFR, TUBB, KRAS, TUBB2A, GRB2, ADCY6, GJA1, A         | 225        | 88       | 6879      | 3.126818    | 0.810731   | 0.035535  | 9.283418 |
| KEGG PATHWAY | hsa05217:Basal cell carcinoma                                         | 7     | 1.511879 | 0.007806 | WNT1, WNT16, GSK3B, TP53, TCF7L2, TCF7L1, CTNN         | 225        | 54       | 6879      | 3.96321     | 0.817417   | 0.035535  | 9.474197 |
| KEGG PATHWAY | hsa04917:Prolactin signaling pathway                                  | 8     | 1.727862 | 0.008011 | KRAS, CCND2, GRB2, MAPK14, GSK3B, SHC1, FOXO/          | 225        | 71       | 6879      | 3.444883    | 0.825432   | 0.03571   | 9.711725 |
| KEGG PATHWAY | hsa05202:Transcriptional misregulation in cancer                      | 13    | 2.807775 | 0.008127 | CCNT2, BM11, IGF1R, WNT16, CDKN1A, FLT1, CDKN/         | 225        | 167      | 6879      | 2.37996     | 0.829797   | 0.035493  | 9.845462 |
| KEGG PATHWAY | hsa04912:GnRH signaling pathway                                       | 9     | 1.943844 | 0.009301 | EGFR, PLD1, KRAS, MAP3K3, GRB2, MAPK14, JUN, A         | 225        | 91       | 6879      | 3.023736    | 0.868358   | 0.039742  | 11.19096 |
| KEGG PATHWAY | hsa04921:Oxytocin signaling pathway                                   | 12    | 2.591793 | 0.009582 | EGFR, CDKN1A, KRAS, RGS2, CACNG8, ROCK2, JUN,          | 225        | 150      | 6879      | 2.445867    | 0.876215   | 0.040137  | 11.5103  |
| KEGG PATHWAY | hsa04150:mTOR signaling pathway                                       | 7     | 1.511879 | 0.010989 | PDPK1, CAB39, PRKAA2, IKKKB, PTEN, IRS1, DDIT4         | 225        | 58       | 6879      | 3.698885    | 0.909089   | 0.045066  | 13.09461 |
| KEGG PATHWAY | hsa05162:Measles                                                      | 11    | 2.37581  | 0.011234 | TNFRSF10A, CCNE2, CDKN1B, TNFRSF10B, CCND2, '          | 225        | 133      | 6879      | 2.528622    | 0.913836   | 0.045201  | 13.367   |
| KEGG PATHWAY | hsa05160:Hepatitis C                                                  | 11    | 2.37581  | 0.011234 | EGFR, CDKN1A, PDPK1, KRAS, TBK1, GRB2, MAPK14          | 225        | 133      | 6879      | 2.528622    | 0.913836   | 0.045201  | 13.367   |
| KEGG PATHWAY | hsa05216:Thyroid cancer                                               | 5     | 1.079914 | 0.011715 | KRAS, TP53, TCF7L2, TCF7L1, CTNNB1                     | 225        | 29       | 6879      | 5.271264    | 0.950054   | 0.053985  | 16.08846 |
| KEGG PATHWAY | hsa05231:Choline metabolism in cancer                                 | 9     | 1.943844 | 0.016704 | EGFR, PLD1, PDPK1, KRAS, WASH3, SP1, PLCG1, GRB        | 225        | 101      | 6879      | 2.724356    | 0.974659   | 0.064441  | 19.3557  |
| KEGG PATHWAY | hsa05131:Shigellosis                                                  | 7     | 1.511879 | 0.017341 | PFN1, CRKL, ARPC3, ROCK2, MAPK14, IKKKB, ELMO          | 225        | 64       | 6879      | 3.343958    | 0.977538   | 0.065538  | 19.92294 |
| KEGG PATHWAY | hsa04062:Chemokine signaling pathway                                  | 13    | 2.807775 | 0.017901 | ROCK2, GRB2, ADCY6, FOXO3, STAT3, CCL22, CRKL          | 225        | 186      | 6879      | 2.136846    | 0.980154   | 0.066456  | 20.50111 |
| KEGG PATHWAY | hsa04022:cGMP-PKG signaling pathway                                   | 11    | 2.37581  | 0.033099 | GNA13, RGS2, ROCK2, CREB1, ADCY6, GATA4, RHO,          | 225        | 158      | 6879      | 2.128523    | 0.999327   | 0.118323  | 34.78681 |
| KEGG PATHWAY | hsa04670:Leukocyte transendothelial migration                         | 9     | 1.943844 | 0.033507 | VCAM1, ACTN4, PLCG1, ROCK2, MAPK14, RHOA, MS           | 225        | 115      | 6879      | 2.392696    | 0.999386   | 0.117812  | 35.13598 |
| KEGG PATHWAY | hsa04020:Cysteine and methionine metabolism                           | 5     | 1.079914 | 0.034001 | DNMT3A, LDHA, GOT1, DNMT3B                             | 225        | 38       | 6879      | 4.022807    | 0.999451   | 0.117601  | 35.5556  |
| KEGG PATHWAY | hsa05221:Acutis myeloid leukemia                                      | 6     | 1.295896 | 0.034826 | KRAS, GRB2, IKKKB, TCF7L2, TCF7L1, STAT3               | 225        | 56       | 6879      | 3.275714    | 0.999544   | 0.118471  | 36.25106 |
| KEGG PATHWAY | hsa04210:Apoptosis                                                    | 6     | 1.295896 | 0.050549 | TNFRSF10A, TNFRSF10B, XIAP, BCL2, TP53, IKKKB          | 225        | 62       | 6879      | 2.95871     | 0.999987   | 0.166024  | 48.25452 |
| KEGG PATHWAY | hsa04962:Vasopressin-regulated water reabsorption                     | 5     | 1.079914 | 0.05386  | RAB5B, CREB1, ADCY6, CREB5, ARHGAP14                   | 225        | 44       | 6879      | 3.474242    | 0.999994   | 0.17362   | 50.50011 |
| KEGG PATHWAY | hsa05120:Epithelial cell signaling in Helicobacter pylori infection</ |       |          |          |                                                        |            |          |           |             |            |           |          |

| Category | Term                                         | Count | %        | PValue   | Genes                                        | List Total | Pop Hits | Pop Total | Fold Enrich | Bonferroni | Benjamini | FDR      |
|----------|----------------------------------------------|-------|----------|----------|----------------------------------------------|------------|----------|-----------|-------------|------------|-----------|----------|
| KEGG     | PA hsa05200:Pathways in cancer               | 66    | 4.925373 | 1.03E-09 | HSP90AB1, E2F1, F2RL3, E2F2, PPARD, E2F3,    | 527        | 393      | 6879      | 2.192129    | 2.72E-07   | 2.72E-07  | 1.35E-06 |
| KEGG     | PA hsa04350:TGF-beta signaling pathway       | 25    | 1.865672 | 7.89E-09 | E2F5, BMPR2, TGFBI2, ACVR1B, ZFYVE9, TH      | 527        | 84       | 6879      | 3.88486     | 2.07E-06   | 1.04E-06  | 1.03E-05 |
| KEGG     | PA hsa04110:Cell cycle                       | 28    | 2.089552 | 4.65E-07 | E2F1, MAD1L1, E2F2, YWHAZ, E2F3, E2F5, P     | 527        | 124      | 6879      | 2.947481    | 1.22E-04   | 4.08E-05  | 6.09E-04 |
| KEGG     | PA hsa04144:Endocytosis                      | 42    | 3.134328 | 7.25E-07 | CAV1, PAR3, RABS5, LDLR, TSG101, CAPZ        | 527        | 241      | 6879      | 2.274819    | 1.91E-04   | 7.76E-05  | 9.49E-04 |
| KEGG     | PA hsa05219:Bladder cancer                   | 15    | 1.119403 | 1.00E-06 | E2F1, RPS6KA5, E2F2, MAPK1, NRAS, E2F3, C    | 527        | 41       | 6879      | 4.775536    | 2.64E-04   | 5.28E-05  | 0.001315 |
| KEGG     | PA hsa05220:Chronic myeloid leukemia         | 20    | 1.492537 | 1.13E-06 | E2F1, E2F2, E2F3, TGFBR1, TGFBR2, TP53, S    | 527        | 72       | 6879      | 3.62587     | 2.97E-04   | 4.95E-05  | 0.001478 |
| KEGG     | PA hsa05161:Hepatitis B                      | 30    | 2.238806 | 1.15E-06 | E2F1, MAVS, E2F2, YWHAZ, E2F3, PTEN, TGI     | 527        | 145      | 6879      | 2.700648    | 3.03E-04   | 4.33E-05  | 0.001509 |
| KEGG     | PA hsa05215:Prostate cancer                  | 22    | 1.641791 | 1.87E-06 | E2F1, HSP90AB1, E2F2, E2F3, HSP90AA1, PD     | 527        | 88       | 6879      | 3.263283    | 4.90E-04   | 6.13E-05  | 0.002442 |
| KEGG     | PA hsa04390:Hippo signaling pathway          | 30    | 2.238806 | 2.74E-06 | YWHAZ, PAR3, BMPR2, WWC1, TCF7L2, T          | 527        | 151      | 6879      | 2.593337    | 7.21E-04   | 8.01E-05  | 0.003589 |
| KEGG     | PA hsa04166:HTLV-I infection                 | 42    | 3.134328 | 2.94E-06 | E2F1, CRT3, E2F2, E2F3, NRP1, XIAP, PDGFI    | 527        | 254      | 6879      | 2.158392    | 7.74E-04   | 7.74E-05  | 0.003854 |
| KEGG     | PA hsa05212:Pancreatic cancer                | 17    | 1.268657 | 2.08E-05 | E2F1, E2F2, E2F3, TGFBR1, TGFBR2, TP53, S    | 527        | 65       | 6879      | 3.413896    | 0.005451   | 4.97E-04  | 0.027212 |
| KEGG     | PA hsa04115:p53 signaling pathway            | 17    | 1.268657 | 3.12E-05 | ZMAT3, CYCS, TP53, PMAIP1, SESN2, SESN1      | 527        | 67       | 6879      | 3.311988    | 0.008177   | 6.84E-04  | 0.040872 |
| KEGG     | PA hsa05205:Proteoglycans in cancer          | 33    | 2.462687 | 4.41E-05 | CAV1, PPP1R12B, ITGB1, TGFBR2, WNT1, PDP     | 527        | 200      | 6879      | 2.153767    | 0.011527   | 8.91E-04  | 0.057708 |
| KEGG     | PA hsa05210:Colorectal cancer                | 16    | 1.19403  | 4.68E-05 | MSH3, TGFBR1, TGFBR2, CYCS, TP53, SMA        | 527        | 62       | 6879      | 3.36855     | 0.012227   | 8.78E-04  | 0.061235 |
| KEGG     | PA hsa04068:FoxO signaling pathway           | 25    | 1.865672 | 6.54E-05 | PTEN, TGFBI2, PDPK1, S1PR1, SOS2, RBL2, T    | 527        | 134      | 6879      | 2.435286    | 0.017046   | 0.001146  | 0.085567 |
| KEGG     | PA hsa04151:PI3K-Akt signaling pathway       | 47    | 3.507463 | 1.18E-04 | HSP90AB1, YWHAZ, FGF7, PHLPP2, MCL1, PI      | 527        | 345      | 6879      | 1.778253    | 0.030528   | 0.001936  | 0.154243 |
| KEGG     | PA hsa05203:Viral carcinogenesis             | 31    | 2.313433 | 3.86E-04 | MAD1L1, YWHAZ, PMAIP1, GTF2H2C, HIST1        | 527        | 205      | 6879      | 1.973888    | 0.096623   | 0.00596   | 0.504655 |
| KEGG     | PA hsa05206:MicroRNAs in cancer              | 39    | 2.910448 | 4.95E-04 | E2F1, YYF2, E2F2, E2F3, MCL1, PDGFB, DIC     | 527        | 286      | 6879      | 1.779972    | 0.122175   | 0.007213  | 0.646693 |
| KEGG     | PA hsa04071:Sphingolipid signaling pathway   | 21    | 1.567164 | 6.94E-04 | PPP2R1A, SGLP1, ROCK1, SPTLC2, ACER2, T      | 527        | 120      | 6879      | 2.284298    | 0.166816   | 0.009559  | 0.904539 |
| KEGG     | PA hsa04310:Wnt signaling pathway            | 23    | 1.716418 | 7.15E-04 | CSNK1A1, FZD9, TBL1XR1, PPARD, WNT10B        | 527        | 138      | 6879      | 2.175522    | 0.171431   | 0.009359  | 0.931936 |
| KEGG     | PA hsa04010:MAPK signaling pathway           | 35    | 2.61194  | 7.99E-04 | FGF7, PDGFB, MAPKAPK5, PPP1R1, MKNK2,        | 527        | 253      | 6879      | 1.805769    | 0.189616   | 0.009962  | 1.041338 |
| KEGG     | PA hsa05169:Epstein-Barr virus infection     | 21    | 1.567164 | 8.61E-04 | NFKB1B, MAP2K3, TP53, HLA-A, HLA-C, RBI      | 527        | 122      | 6879      | 2.24685     | 0.202655   | 0.010241  | 1.121226 |
| KEGG     | PA hsa05221:Acute myeloid leukemia           | 13    | 0.970149 | 8.73E-04 | PPARD, KIT, TCF7L2, STAT3, NRAS, MAPK1,      | 527        | 56       | 6879      | 3.030191    | 0.205244   | 0.009938  | 1.137241 |
| KEGG     | PA hsa05214:Glioma                           | 14    | 1.044776 | 0.001072 | E2F1, E2F2, E2F3, PDGFB, TP53, RB1, PTEN, F  | 527        | 65       | 6879      | 2.811444    | 0.245753   | 0.011683  | 1.394414 |
| KEGG     | PA hsa05222:Small cell lung cancer           | 16    | 1.19403  | 0.001755 | E2F1, E2F2, E2F3, XIAP, CYCS, TP53, TFGA2, I | 527        | 85       | 6879      | 2.45706     | 0.369943   | 0.018308  | 2.273731 |
| KEGG     | PA hsa05218:Melanoma                         | 14    | 1.044776 | 0.002485 | E2F1, E2F2, E2F3, FGF7, PDGFB, MET, TP53, I  | 527        | 71       | 6879      | 2.573857    | 0.480298   | 0.024859  | 3.206166 |
| KEGG     | PA hsa04810:Regulation of actin cytoskeleton | 29    | 2.164179 | 0.002545 | FGF7, PDGFB, DIAPH1, PPP1R12B, ARHGAP35,     | 527        | 210      | 6879      | 1.802575    | 0.488417   | 0.024518  | 3.282018 |
| KEGG     | PA hsa05211:Renal cell carcinoma             | 13    | 0.970149 | 0.003821 | EPAS1, PDGFB, MET, EGLN3, TGFBR2, PAK6, I    | 527        | 66       | 6879      | 2.571071    | 0.634602   | 0.035317  | 4.889047 |
| KEGG     | PA hsa04612:Antigen processing and presentat | 28    | 2.089552 | 0.00384  | CAV1, XIAP, PDGFB, PPP1R12B, ARHGAP35,       | 527        | 206      | 6879      | 1.774212    | 0.636474   | 0.034292  | 4.913368 |
| KEGG     | PA hsa04722:Neurotrophin signaling pathway   | 19    | 1.41791  | 0.004189 | NFKB1B, TP53, YWHAE, IRS1, IRAK4, RPS6K,     | 527        | 120      | 6879      | 2.066746    | 0.668498   | 0.036135  | 5.348939 |
| KEGG     | PA hsa04612:Antigen processing and presentat | 14    | 1.044776 | 0.004599 | HSP90AB1, HSP90AA1, PDIA3, CREB1, HLA-A      | 527        | 76       | 6879      | 2.404524    | 0.702486   | 0.038351  | 5.857348 |
| KEGG     | PA hsa04550:Signaling pathways regulating pl | 21    | 1.567164 | 0.004632 | FZD9, BMP2, WNT10B, JARID2, SMAD5, BMP       | 527        | 140      | 6879      | 1.95797     | 0.705064   | 0.037437  | 5.898138 |
| KEGG     | PA hsa05216:Thyroid cancer                   | 8     | 0.597015 | 0.0052   | MAPK1, NRAS, CCDC6, CCND1, PPARG, TP5,       | 527        | 29       | 6879      | 3.608864    | 0.746214   | 0.040702  | 6.599547 |
| KEGG     | PA hsa04012:ErbB signaling pathway           | 15    | 1.119403 | 0.005865 | NRG4, PRKCB, PAK6, NRAS, MAPK1, CDKN1        | 527        | 87       | 6879      | 2.25054     | 0.787149   | 0.044485  | 7.413964 |
| KEGG     | PA hsa05230:Central carbon metabolism in car | 12    | 0.895522 | 0.008502 | MAPK1, SLC1A5, NRAS, HIF1A, MET, TP53, P     | 527        | 64       | 6879      | 2.447462    | 0.894139   | 0.062146  | 10.57839 |
| KEGG     | PA hsa05145:Toxoplasmosis                    | 17    | 1.268657 | 0.009046 | XIAP, LDLR, NFKB1B, MAP2K3, CYCS, ITGB1      | 527        | 110      | 6879      | 2.017302    | 0.908353   | 0.064228  | 11.21799 |
| KEGG     | PA hsa05223:Non-small cell lung cancer       | 11    | 0.820896 | 0.009076 | E2F1, MAPK1, NRAS, E2F2, PDPK1, E2F3, CC     | 527        | 56       | 6879      | 2.564008    | 0.909089   | 0.062752  | 11.25364 |
| KEGG     | PA hsa03018:RNA degradation                  | 13    | 0.970149 | 0.01327  | PAN3, EXOSC2, PFKF, PAPD5, DIS3, CNOT7       | 527        | 77       | 6879      | 2.203775    | 0.970204   | 0.088312  | 16.04827 |
| KEGG     | PA hsa05213:Endometrial cancer               | 10    | 0.746269 | 0.015865 | MAPK1, NRAS, PDPK1, CCND1, SOS2, TP53, I     | 527        | 52       | 6879      | 2.510217    | 0.985092   | 0.102231  | 18.89338 |
| KEGG     | PA hsa04962:Vasopressin-regulated water reat | 9     | 0.671642 | 0.016906 | STX4, DYNC1L12, RAB5B, DYNLL2, CREB1, I      | 527        | 44       | 6879      | 2.669599    | 0.988715   | 0.106052  | 20.01013 |
| KEGG     | PA hsa05222:Small cell lung cancer           | 12    | 0.895522 | 0.018077 | MAPK1, PAR3, CSNK2A1, TGFBR1, TGFBR2         | 527        | 71       | 6879      | 2.206163    | 0.991752   | 0.110431  | 21.24875 |
| KEGG     | PA hsa05164:Influenza A                      | 22    | 1.641791 | 0.024009 | MAVS, NUP98, NFKB1B, MAP2K3, CYCS, CCI       | 527        | 174      | 6879      | 1.650396    | 0.998324   | 0.141161  | 27.25557 |
| KEGG     | PA hsa05162:Measles                          | 18    | 1.343284 | 0.024378 | MAVS, NFKB1B, TP53, TLR7, STAT3, IFNAR1      | 527        | 133      | 6879      | 1.766589    | 0.998483   | 0.140112  | 27.61565 |
| KEGG     | PA hsa04360:Axon guidance                    | 17    | 1.268657 | 0.032001 | ABLIM1, NRP1, ROCK1, PLXNA1, LIMK1, ME       | 527        | 127      | 6879      | 1.747269    | 0.999807   | 0.176676  | 34.68107 |
| KEGG     | PA hsa05160:Hepatitis C                      | 17    | 1.268657 | 0.046124 | MAVS, PPP2R1A, LDLR, TP53, STAT3, IFNAR      | 527        | 133      | 6879      | 1.668445    | 0.999996   | 0.241176  | 46.11653 |
| KEGG     | PA hsa05217:Basal cell carcinoma             | 9     | 0.671642 | 0.051093 | FZD9, WNT1, BMP2, WNT10B, TP53, FZD5, T      | 527        | 54       | 6879      | 2.175522    | 0.999999   | 0.259069  | 49.67861 |
| KEGG     | PA hsa05131:Shigellosis                      | 10    | 0.746269 | 0.053053 | MAPK1, ROCK1, ITGA5, ARPC2, NFKB1B, MA       | 527        | 64       | 6879      | 2.039552    | 0.999999   | 0.262893  | 51.02104 |
| KEGG     | PA hsa04919:Thyroid hormone signaling pathw  | 15    | 1.119403 | 0.054818 | ATP1B3, PFKFB2, TP53, PRKCB, NRAS, MAP1      | 527        | 115      | 6879      | 1.702582    | 1          | 0.265747  | 52.20438 |
| KEGG     | PA hsa04066:HIF-1 signaling pathway          | 13    | 0.970149 | 0.061103 | EGLN3, MKNK2, PDH, STAT3, PRKCB, MAP         | 527        | 96       | 6879      | 1.767611    | 1          | 0.287097  | 56.20307 |
| KEGG     | PA hsa05416:Viral myocarditis                | 9     | 0.671642 | 0.066615 | EIF4G2, CAV1, CCND1, CYCS, HLA-A, HLA-C      | 527        | 57       | 6879      | 2.061021    | 1          | 0.304144  | 59.45295 |
| KEGG     | PA hsa04150:mTOR signaling pathway           | 9     | 0.671642 | 0.07237  | MAPK1, EIF4EBP1, PDPK1, ULK1, RRAGD, IK      | 527        | 58       | 6879      | 2.025486    | 1          | 0.321179  | 62.6074  |
| KEGG     | PA hsa04380:Osteoclast differentiation       | 16    | 1.19403  | 0.074124 | CREB1, TGFBR1, PPARG, TGFBR2, PPP3R1, S      | 527        | 131      | 6879      | 1.594276    | 1          | 0.322616  | 63.52237 |
| KEGG     | PA hsa04916:Melanogenesis                    | 13    | 0.970149 | 0.078274 | FZD9, WNT10B, CREB1, KIT, FZD5, TCF7L2, \    | 527        | 100      | 6879      | 1.696907    | 1          | 0.332663  | 65.0635  |
| KEGG     | PA hsa04152:AMPK signaling pathway           | 15    | 1.119403 | 0.085701 | PPP2R1A, CREB1, PFKFB2, SCD, PPARG, PFK      | 527        | 123      | 6879      | 1.591845    | 1          | 0.335625  | 69.06373 |
| KEGG     | PA hsa04917:Prolactin signaling pathway      | 10    | 0.746269 | 0.090177 | MAPK1, NRAS, CCND1, CCND2, SOS2, MAPK        | 527        | 71       | 6879      | 1.838469    | 1          | 0.363586  | 70.98915 |
| KEGG     | PA hsa04141:Protein processing in endoplasm  | 19    | 1.41791  | 0.093931 | SEC23A, HSP90AB1, NPLOC4, HSP90AA1, PD       | 527        | 169      | 6879      | 1.467512    | 1          | 0.370769  | 72.51817 |
| KEGG     | PA hsa05142:Chagas disease (American trypan  | 13    | 0.970149 | 0.098236 | PPP2R1A, TGFBR1, TGFBR2, SMAD2, CCL5, \      | 527        | 104      | 6879      | 1.631641    | 1          | 0.379421  | 74.17959 |
