# Supplementary material for: Integrated MicroRNA Expression Profile Reveals Dysregulated miR‐20a‐5p and miR‐200a‐3p in Liver Fibrosis
Source: Hindawi journal article supplement (doi:10.1155/2021/9583932), 2021-01-01
Supplement: f1 [file 9583932.f1.pdf]

| miRTarBase ID | miRNA          | Target Gene | Target Gene<br>(Entrez Gene ID) | Experiments                                               | Support Type          | References (PMID) |
|---------------|----------------|-------------|---------------------------------|-----------------------------------------------------------|-----------------------|-------------------|
| MIRT000576    | hsa-miR-182-5p | CDKN1A      | 1026                            | qRT-PCR/Luciferase reporter assay/Western blot            | Non-Functional MTI    | 20190813          |
| MIRT000671    | hsa-miR-182-5p | FOXO3       | 2309                            | Luciferase reporter assay/Western blot                    | Functional MTI        | 19188590          |
| MIRT001086    | hsa-miR-182-5p | FOXO3       | 2308                            | qRT-PCR/Luciferase reporter assay/Western blot            | Functional MTI        | 19574223          |
| MIRT001222    | hsa-miR-182-5p | RARG        | 5916                            | Luciferase reporter assay/Western blot                    | Functional MTI        | 19782699          |
| MIRT001990    | hsa-miR-182-5p | MITF        | 4286                            | Luciferase reporter assay                                 | Functional MTI        | 17597072          |
| MIRT001992    | hsa-miR-182-5p | ADCY6       | 112                             | Luciferase reporter assay                                 | Functional MTI        | 17597072          |
| MIRT003601    | hsa-miR-182-5p | EP300       | 2033                            | Microarray                                                | Functional MTI (Weak) | 19569050          |
| MIRT005358    | hsa-miR-182-5p | CLOCK       | 9575                            | Luciferase reporter assay/qRT-PCR                         | Functional MTI        | 20656788          |
| MIRT005359    | hsa-miR-182-5p | TSC22D3     | 1831                            | Luciferase reporter assay/qRT-PCR                         | Functional MTI        | 20656788          |
| MIRT006273    | hsa-miR-182-5p | CREB1       | 1385                            | GFP reporter assay                                        | Functional MTI        | 22325466          |
| MIRT006300    | hsa-miR-182-5p | MTSS1       | 9788                            | Luciferase reporter assay                                 | Functional MTI        | 22322863          |
| MIRT006823    | hsa-miR-182-5p | FGF9        | 2254                            | Luciferase reporter assay/Western blot                    | Functional MTI        | 22917588          |
| MIRT006824    | hsa-miR-182-5p | NTM         | 50863                           | Luciferase reporter assay/Western blot                    | Functional MTI        | 22917588          |
| MIRT006978    | hsa-miR-182-5p | CYLD        | 1540                            | Luciferase reporter assay/qRT-PCR/Western blot            | Functional MTI        | 23006329          |
| MIRT007063    | hsa-miR-182-5p | BCL2        | 596                             | Flow/Luciferase reporter assay/qRT-PCR/Western blot       | Functional MTI        | 22848417          |
| MIRT007064    | hsa-miR-182-5p | CCND2       | 894                             | Flow/Luciferase reporter assay/qRT-PCR/Western blot       | Functional MTI        | 22848417          |
| MIRT007155    | hsa-miR-182-5p | PDCD4       | 27250                           | Luciferase reporter assay/qRT-PCR/Western blot            | Functional MTI        | 23296900          |
| MIRT007199    | hsa-miR-182-5p | PFN1        | 5216                            | Luciferase reporter assay                                 | Functional MTI        | 23430586          |
| MIRT007226    | hsa-miR-182-5p | SNAI2       | 6591                            | Luciferase reporter assay                                 | Functional MTI        | 23354685          |
| MIRT007293    | hsa-miR-182-5p | RECK        | 8434                            | Luciferase reporter assay/qRT-PCR/Western blot            | Functional MTI        | 23333633          |
| MIRT007306    | hsa-miR-182-5p | SMAD4       | 4089                            | Luciferase reporter assay                                 | Functional MTI        | 23264455          |
| MIRT007330    | hsa-miR-182-5p | FOXF2       | 2295                            | Luciferase reporter assay                                 | Functional MTI        | 23383207          |
| MIRT025033    | hsa-miR-182-5p | IGF1R       | 3480                            | PAR-CLIP                                                  | Functional MTI (Weak) | 21572407          |
| MIRT047175    | hsa-miR-182-5p | CISD2       | 493856                          | CLASH                                                     | Functional MTI (Weak) | 23622248          |
| MIRT047176    | hsa-miR-182-5p | BRIP1       | 83990                           | CLASH                                                     | Functional MTI (Weak) | 23622248          |
| MIRT047177    | hsa-miR-182-5p | RBM12       | 10137                           | CLASH                                                     | Functional MTI (Weak) | 23622248          |
| MIRT047178    | hsa-miR-182-5p | CBX6        | 23466                           | CLASH                                                     | Functional MTI (Weak) | 23622248          |
| MIRT047179    | hsa-miR-182-5p | FMNL3       | 91010                           | CLASH                                                     | Functional MTI (Weak) | 23622248          |
| MIRT047180    | hsa-miR-182-5p | RPL5        | 6125                            | CLASH                                                     | Functional MTI (Weak) | 23622248          |
| MIRT047181    | hsa-miR-182-5p | RCC2        | 55920                           | CLASH                                                     | Functional MTI (Weak) | 23622248          |
| MIRT047182    | hsa-miR-182-5p | GNL1        | 2794                            | CLASH                                                     | Functional MTI (Weak) | 23622248          |
| MIRT047183    | hsa-miR-182-5p | SNRPA1      | 6627                            | CLASH                                                     | Functional MTI (Weak) | 23622248          |
| MIRT047184    | hsa-miR-182-5p | C1orf174    | 339448                          | CLASH                                                     | Functional MTI (Weak) | 23622248          |
| MIRT047185    | hsa-miR-182-5p | RLF         | 6018                            | CLASH                                                     | Functional MTI (Weak) | 23622248          |
| MIRT047186    | hsa-miR-182-5p | CASC3       | 22794                           | CLASH                                                     | Functional MTI (Weak) | 23622248          |
| MIRT047187    | hsa-miR-182-5p | FLOT1       | 10211                           | CLASH                                                     | Functional MTI (Weak) | 23622248          |
| MIRT047188    | hsa-miR-182-5p | BAG1        | 573                             | CLASH                                                     | Functional MTI (Weak) | 23622248          |
| MIRT047189    | hsa-miR-182-5p | RBM15B      | 29890                           | CLASH                                                     | Functional MTI (Weak) | 23622248          |
| MIRT047190    | hsa-miR-182-5p | LSM14A      | 26065                           | CLASH                                                     | Functional MTI (Weak) | 23622248          |
| MIRT047191    | hsa-miR-182-5p | RPS4X       | 6191                            | CLASH                                                     | Functional MTI (Weak) | 23622248          |
| MIRT047192    | hsa-miR-182-5p | UBA1        | 7317                            | CLASH                                                     | Functional MTI (Weak) | 23622248          |
| MIRT047193    | hsa-miR-182-5p | RPS3        | 6188                            | CLASH                                                     | Functional MTI (Weak) | 23622248          |
| MIRT047194    | hsa-miR-182-5p | CENPS       | 378708                          | CLASH                                                     | Functional MTI (Weak) | 23622248          |
| MIRT047195    | hsa-miR-182-5p | TMEM184C    | 55751                           | CLASH                                                     | Functional MTI (Weak) | 23622248          |
| MIRT047196    | hsa-miR-182-5p | ETV3        | 2117                            | CLASH                                                     | Functional MTI (Weak) | 23622248          |
| MIRT047197    | hsa-miR-182-5p | SEC61A2     | 55176                           | CLASH                                                     | Functional MTI (Weak) | 23622248          |
| MIRT047198    | hsa-miR-182-5p | UBP1        | 7342                            | CLASH                                                     | Functional MTI (Weak) | 23622248          |
| MIRT047199    | hsa-miR-182-5p | USP16       | 10600                           | CLASH                                                     | Functional MTI (Weak) | 23622248          |
| MIRT047200    | hsa-miR-182-5p | ACVR1B      | 91                              | CLASH                                                     | Functional MTI (Weak) | 23622248          |
| MIRT047201    | hsa-miR-182-5p | STAG2       | 10735                           | CLASH                                                     | Functional MTI (Weak) | 23622248          |
| MIRT047202    | hsa-miR-182-5p | RAB3IP      | 117177                          | CLASH                                                     | Functional MTI (Weak) | 23622248          |
| MIRT047203    | hsa-miR-182-5p | ATP5O       | 539                             | CLASH                                                     | Functional MTI (Weak) | 23622248          |
| MIRT047204    | hsa-miR-182-5p | SLC25A14    | 9016                            | CLASH                                                     | Functional MTI (Weak) | 23622248          |
| MIRT047205    | hsa-miR-182-5p | TTC28       | 23331                           | CLASH                                                     | Functional MTI (Weak) | 23622248          |
| MIRT047206    | hsa-miR-182-5p | NUFIP2      | 57532                           | CLASH                                                     | Functional MTI (Weak) | 23622248          |
| MIRT047207    | hsa-miR-182-5p | TNKS1BP1    | 85456                           | CLASH                                                     | Functional MTI (Weak) | 23622248          |
| MIRT047208    | hsa-miR-182-5p | ACTN4       | 81                              | CLASH                                                     | Functional MTI (Weak) | 23622248          |
| MIRT047209    | hsa-miR-182-5p | TUBA1B      | 10376                           | CLASH                                                     | Functional MTI (Weak) | 23622248          |
| MIRT047210    | hsa-miR-182-5p | EVI5        | 7813                            | CLASH                                                     | Functional MTI (Weak) | 23622248          |
| MIRT047211    | hsa-miR-182-5p | VPS51       | 738                             | CLASH                                                     | Functional MTI (Weak) | 23622248          |
| MIRT047212    | hsa-miR-182-5p | ANO6        | 196527                          | CLASH                                                     | Functional MTI (Weak) | 23622248          |
| MIRT047213    | hsa-miR-182-5p | PCOLCE2     | 26577                           | CLASH                                                     | Functional MTI (Weak) | 23622248          |
| MIRT047214    | hsa-miR-182-5p | LBR         | 3930                            | CLASH                                                     | Functional MTI (Weak) | 23622248          |
| MIRT047215    | hsa-miR-182-5p | PIK3C2A     | 5286                            | CLASH                                                     | Functional MTI (Weak) | 23622248          |
| MIRT047216    | hsa-miR-182-5p | ERO1A       | 30001                           | CLASH                                                     | Functional MTI (Weak) | 23622248          |
| MIRT047217    | hsa-miR-182-5p | PRKAA2      | 5563                            | CLASH                                                     | Functional MTI (Weak) | 23622248          |
| MIRT047218    | hsa-miR-182-5p | ATP13A3     | 79572                           | CLASH                                                     | Functional MTI (Weak) | 23622248          |
| MIRT052907    | hsa-miR-182-5p | PTEN        | 5728                            | Luciferase reporter assay/Microarray/qRT-PCR/Western blot | Functional MTI        | 24867318          |
| MIRT053784    | hsa-miR-182-5p | GSK3B       | 2932                            | Immunohistochemistry/Luciferase reporter assay/Microarray | Functional MTI        | 24335145          |
| MIRT054261    | hsa-miR-182-5p | ZFAND4      | 93550                           | Immunofluorescence/Immunohistochemistry/Luciferase        | Functional MTI        | 25682742          |
| MIRT054501    | hsa-miR-182-5p | BDNF        | 627                             | qRT-PCR/Western blotting                                  | Functional MTI        | 23704927          |
| MIRT054760    | hsa-miR-182-5p | SATB2       | 23314                           | Luciferase reporter assay/QRT-PCR/Western blot            | Functional MTI        | 24884732          |
| MIRT054831    | hsa-miR-182-5p | CHL1        | 10752                           | Luciferase reporter assay/QRT-PCR/Western blot            | Functional MTI        | 24971532          |
| MIRT054846    | hsa-miR-182-5p | CADM1       | 23705                           | Luciferase reporter assay/qRT-PCR/Western blot            | Functional MTI        | 24445397          |
| MIRT054847    | hsa-miR-182-5p | TP53INP1    | 94241                           | Luciferase reporter assay/qRT-PCR/Western blot            | Functional MTI        | 24447717          |
| MIRT180171    | hsa-miR-182-5p | NOTCH2      | 4853                            | HITS-CLIP                                                 | Functional MTI (Weak) | 23824327          |
| MIRT203593    | hsa-miR-182-5p | BRWD1       | 54014                           | HITS-CLIP                                                 | Functional MTI (Weak) | 23313552          |
| MIRT217011    | hsa-miR-182-5p | ARRDC3      | 57561                           | Luciferase reporter assay                                 | Functional MTI        | 27109471          |
| MIRT265950    | hsa-miR-182-5p | QSER1       | 79832                           | PAR-CLIP                                                  | Functional MTI (Weak) | 21572407          |
| MIRT353008    | hsa-miR-182-5p | NUP50       | 10762                           | PAR-CLIP                                                  | Functional MTI (Weak) | 20371350          |
| MIRT437453    | hsa-miR-182-5p | ATF1        | 466                             | Luciferase reporter assay                                 | Functional MTI        | 23249749          |
| MIRT437454    | hsa-miR-182-5p | BARD1       | 580                             | Luciferase reporter assay                                 | Functional MTI        | 23249749          |
| MIRT437455    | hsa-miR-182-5p | CREB5       | 9586                            | Luciferase reporter assay                                 | Functional MTI        | 23249749          |
| MIRT437456    | hsa-miR-182-5p | RAD17       | 5884                            | Luciferase reporter assay                                 | Functional MTI        | 23249749          |
| MIRT437457    | hsa-miR-182-5p | TP53BP1     | 7158                            | Luciferase reporter assay                                 | Functional MTI        | 23249749          |
| MIRT437458    | hsa-miR-182-5p | CHEK2       | 11200                           | Luciferase reporter assay                                 | Functional MTI        | 23249749          |
| MIRT437459    | hsa-miR-182-5p | CDKN1B      | 1027                            | Luciferase reporter assay                                 | Functional MTI        | 23249749          |
| MIRT437460    | hsa-miR-182-5p | SMARCD3     | 6604                            | Luciferase reporter assay                                 | Functional MTI        | 23249749          |
| MIRT437477    | hsa-miR-182-5p | TCEAL7      | 56849                           | Luciferase reporter assay/qRT-PCR/Western blot            | Functional MTI        | 24021963          |
| MIRT437908    | hsa-miR-182-5p | FBXW7       | 55294                           | Luciferase reporter assay/Western blot                    | Functional MTI        | 25269767          |
| MIRT437991    | hsa-miR-182-5p | LRRC4       | 64101                           | qRT-PCR/Immunohistochemistry/Luciferase reporter assay    | Functional MTI        | 24404152          |
| MIRT438101    | hsa-miR-182-5p | NDRG1       | 10397                           | Luciferase reporter assay                                 | Functional MTI        | 23874837          |
| MIRT438374    | hsa-miR-182-5p | THBS1       | 7057                            | Luciferase reporter assay                                 | Functional MTI        | 24053448          |
| MIRT438756    | hsa-miR-182-5p | ULBP2       | 80328                           | Luciferase reporter assay/qRT-PCR/Western blot            | Functional MTI        | 23956116          |
| MIRT442967    | hsa-miR-182-5p | CTNNA3      | 29119                           | PAR-CLIP                                                  | Functional MTI (Weak) | 22100165          |

|            |                 |           |           |                                                        |                       |          |
|------------|-----------------|-----------|-----------|--------------------------------------------------------|-----------------------|----------|
| MIRT447362 | hsa-miR-182-5p  | RASA2     | 5922      | PAR-CLIP                                               | Functional MTI (Weak) | 22100165 |
| MIRT452673 | hsa-miR-182-5p  | GPR156    | 165829    | PAR-CLIP                                               | Functional MTI (Weak) | 23592263 |
| MIRT453463 | hsa-miR-182-5p  | PITPNM3   | 83394     | PAR-CLIP                                               | Functional MTI (Weak) | 23592263 |
| MIRT454767 | hsa-miR-182-5p  | STOML3    | 161003    | PAR-CLIP                                               | Functional MTI (Weak) | 23592263 |
| MIRT468017 | hsa-miR-182-5p  | SIN3B     | 23309     | PAR-CLIP                                               | Functional MTI (Weak) | 23592263 |
| MIRT468529 | hsa-miR-182-5p  | SERPINH1  | 871       | PAR-CLIP                                               | Functional MTI (Weak) | 23592263 |
| MIRT470488 | hsa-miR-182-5p  | PPP1R11   | 6992      | PAR-CLIP                                               | Functional MTI (Weak) | 23592263 |
| MIRT474426 | hsa-miR-182-5p  | KLHL28    | 54813     | PAR-CLIP                                               | Functional MTI (Weak) | 23592263 |
| MIRT481285 | hsa-miR-182-5p  | ATXN1L    | 342371    | PAR-CLIP                                               | Functional MTI (Weak) | 23592263 |
| MIRT491596 | hsa-miR-182-5p  | CCL22     | 6367      | PAR-CLIP                                               | Functional MTI (Weak) | 23592263 |
| MIRT501916 | hsa-miR-182-5p  | MBD4      | 8930      | PAR-CLIP                                               | Functional MTI (Weak) | 24398324 |
| MIRT502391 | hsa-miR-182-5p  | CASTOR2   | 729438    | PAR-CLIP                                               | Functional MTI (Weak) | 24398324 |
| MIRT503220 | hsa-miR-182-5p  | ACER2     | 340485    | PAR-CLIP                                               | Functional MTI (Weak) | 24398324 |
| MIRT503542 | hsa-miR-182-5p  | RPL7L1    | 285855    | PAR-CLIP                                               | Functional MTI (Weak) | 23446348 |
| MIRT505720 | hsa-miR-182-5p  | SESN2     | 83667     | PAR-CLIP                                               | Functional MTI (Weak) | 23446348 |
| MIRT509890 | hsa-miR-182-5p  | RPS23     | 6228      | PAR-CLIP                                               | Functional MTI (Weak) | 23446348 |
| MIRT525375 | hsa-miR-182-5p  | SYNM      | 23336     | PAR-CLIP                                               | Functional MTI (Weak) | 22012620 |
| MIRT529422 | hsa-miR-182-5p  | MALT1     | 10892     | PAR-CLIP                                               | Functional MTI (Weak) | 22012620 |
| MIRT533379 | hsa-miR-182-5p  | UBE2D4    | 51619     | PAR-CLIP                                               | Functional MTI (Weak) | 22012620 |
| MIRT533467 | hsa-miR-182-5p  | TRIM71    | 131405    | PAR-CLIP                                               | Functional MTI (Weak) | 22012620 |
| MIRT533594 | hsa-miR-182-5p  | TNRC6A    | 27327     | PAR-CLIP                                               | Functional MTI (Weak) | 22012620 |
| MIRT535084 | hsa-miR-182-5p  | PODXL     | 5420      | PAR-CLIP                                               | Functional MTI (Weak) | 22012620 |
| MIRT541181 | hsa-miR-182-5p  | MORF4L1   | 10933     | PAR-CLIP                                               | Functional MTI (Weak) | 22152407 |
| MIRT549835 | hsa-miR-182-5p  | ECHDC1    | 55862     | PAR-CLIP                                               | Functional MTI (Weak) | 21572407 |
| MIRT550346 | hsa-miR-182-5p  | INCENP    | 3619      | PAR-CLIP                                               | Functional MTI (Weak) | 21572407 |
| MIRT553851 | hsa-miR-182-5p  | SYDE2     | 84144     | PAR-CLIP                                               | Functional MTI (Weak) | 21572407 |
| MIRT555374 | hsa-miR-182-5p  | PPP1R12A  | 4659      | PAR-CLIP                                               | Functional MTI (Weak) | 21572407 |
| MIRT555508 | hsa-miR-182-5p  | PNISR     | 25957     | PAR-CLIP                                               | Functional MTI (Weak) | 21572407 |
| MIRT555928 | hsa-miR-182-5p  | NUP43     | 348995    | PAR-CLIP                                               | Functional MTI (Weak) | 21572407 |
| MIRT556301 | hsa-miR-182-5p  | MAP3K3    | 4215      | PAR-CLIP                                               | Functional MTI (Weak) | 21572407 |
| MIRT557099 | hsa-miR-182-5p  | HOXA9     | 3205      | PAR-CLIP                                               | Functional MTI (Weak) | 21572407 |
| MIRT557242 | hsa-miR-182-5p  | CRAMP1    | 57585     | PAR-CLIP                                               | Functional MTI (Weak) | 21572407 |
| MIRT557937 | hsa-miR-182-5p  | MIGA1     | 374986    | PAR-CLIP                                               | Functional MTI (Weak) | 21572407 |
| MIRT558452 | hsa-miR-182-5p  | DDAH1     | 23576     | PAR-CLIP                                               | Functional MTI (Weak) | 21572407 |
| MIRT558720 | hsa-miR-182-5p  | CITFD2    | 10370     | PAR-CLIP                                               | Functional MTI (Weak) | 21572407 |
| MIRT561179 | hsa-miR-182-5p  | TNFRSF10A | 8797      | PAR-CLIP                                               | Functional MTI (Weak) | 20371350 |
| MIRT565334 | hsa-miR-182-5p  | TMEM170B  | 100113407 | PAR-CLIP                                               | Functional MTI (Weak) | 20371350 |
| MIRT571607 | hsa-miR-182-5p  | SYNGR2    | 9144      | PAR-CLIP                                               | Functional MTI (Weak) | 20371350 |
| MIRT573342 | hsa-miR-182-5p  | TUBD1     | 51174     | PAR-CLIP                                               | Functional MTI (Weak) | 20371350 |
| MIRT574601 | hsa-miR-182-5p  | LZIC      | 84328     | PAR-CLIP                                               | Functional MTI (Weak) | 20371350 |
| MIRT609631 | hsa-miR-182-5p  | PLEKHA8   | 84725     | HITS-CLIP                                              | Functional MTI (Weak) | 23824327 |
| MIRT612970 | hsa-miR-182-5p  | GID4      | 79018     | HITS-CLIP                                              | Functional MTI (Weak) | 23824327 |
| MIRT614906 | hsa-miR-182-5p  | NPTX1     | 4884      | HITS-CLIP                                              | Functional MTI (Weak) | 23824327 |
| MIRT614997 | hsa-miR-182-5p  | GABRB1    | 2560      | HITS-CLIP                                              | Functional MTI (Weak) | 23824327 |
| MIRT621334 | hsa-miR-182-5p  | SLC11A1   | 6556      | HITS-CLIP                                              | Functional MTI (Weak) | 23824327 |
| MIRT622018 | hsa-miR-182-5p  | STK17B    | 9262      | HITS-CLIP                                              | Functional MTI (Weak) | 23824327 |
| MIRT640564 | hsa-miR-182-5p  | CPE       | 1363      | HITS-CLIP                                              | Functional MTI (Weak) | 23824327 |
| MIRT644327 | hsa-miR-182-5p  | IPP       | 3652      | HITS-CLIP                                              | Functional MTI (Weak) | 23824327 |
| MIRT646586 | hsa-miR-182-5p  | ANKRD36   | 375248    | HITS-CLIP                                              | Functional MTI (Weak) | 23824327 |
| MIRT650974 | hsa-miR-182-5p  | ZNF831    | 128611    | HITS-CLIP                                              | Functional MTI (Weak) | 23824327 |
| MIRT652228 | hsa-miR-182-5p  | TRAPP3L   | 100128327 | HITS-CLIP                                              | Functional MTI (Weak) | 23824327 |
| MIRT654840 | hsa-miR-182-5p  | PPM1L     | 151742    | HITS-CLIP                                              | Functional MTI (Weak) | 23824327 |
| MIRT656984 | hsa-miR-182-5p  | KDM5A     | 5927      | HITS-CLIP                                              | Functional MTI (Weak) | 23824327 |
| MIRT658776 | hsa-miR-182-5p  | EIF4EBP2  | 1979      | HITS-CLIP                                              | Functional MTI (Weak) | 23824327 |
| MIRT668093 | hsa-miR-182-5p  | GK5       | 256356    | HITS-CLIP                                              | Functional MTI (Weak) | 23824327 |
| MIRT668472 | hsa-miR-182-5p  | EXOSC2    | 23404     | HITS-CLIP                                              | Functional MTI (Weak) | 23824327 |
| MIRT687430 | hsa-miR-182-5p  | NR3C1     | 2908      | HITS-CLIP                                              | Functional MTI (Weak) | 23313552 |
| MIRT689956 | hsa-miR-182-5p  | ZNF185    | 7739      | HITS-CLIP                                              | Functional MTI (Weak) | 23313552 |
| MIRT690114 | hsa-miR-182-5p  | ZFAND1    | 79752     | HITS-CLIP                                              | Functional MTI (Weak) | 23313552 |
| MIRT697753 | hsa-miR-182-5p  | USP5      | 8078      | HITS-CLIP                                              | Functional MTI (Weak) | 23313552 |
| MIRT720750 | hsa-miR-182-5p  | FAM193A   | 8603      | HITS-CLIP                                              | Functional MTI (Weak) | 19536157 |
| MIRT732738 | hsa-miR-182-5p  | PDK4      | 5166      | Luciferase reporter assay//qRT-PCR//Western blot       | Functional MTI        | 27396327 |
| MIRT733430 | hsa-miR-182-5p  | PLD1      | 5337      | Immunofluorescence//Western blot                       | Functional MTI        | 26787840 |
| MIRT734109 | hsa-miR-182-5p  | TRIM8     | 81603     | Luciferase reporter assay//qRT-PCR//Western blot       | Functional MTI        | 28280352 |
| MIRT734439 | hsa-miR-182-5p  | TIAM1     | 7074      | Luciferase reporter assay//qRT-PCR//Western blot       | Functional MTI        | 25973950 |
| MIRT734564 | hsa-miR-182-5p  | CUL5      | 8065      | qRT-PCR                                                | Functional MTI (Weak) | 26847831 |
| MIRT735083 | hsa-miR-182-5p  | PCDH8     | 5100      | Luciferase reporter assay                              | Functional MTI        | 27246830 |
| MIRT735126 | hsa-miR-182-5p  | NRN1      | 51299     | Luciferase reporter assay                              | Functional MTI        | 26622652 |
| MIRT735463 | hsa-miR-182-5p  | UQCRRF1   | 7386      | Flow//Luciferase reporter assay//qRT-PCR//Western blot | Functional MTI        | 27476169 |
| MIRT738068 | hsa-miR-182-5p  | AMMECR1L  | 83607     | PAR-CLIP                                               | Functional MTI (Weak) | 26701625 |
| MIRT738069 | hsa-miR-182-5p  | ATP8A2    | 51761     | PAR-CLIP                                               | Functional MTI (Weak) | 26701625 |
| MIRT738070 | hsa-miR-182-5p  | NFIC      | 4782      | PAR-CLIP                                               | Functional MTI (Weak) | 26701625 |
| MIRT738071 | hsa-miR-182-5p  | NPM1      | 4869      | PAR-CLIP                                               | Functional MTI (Weak) | 26701625 |
| MIRT738072 | hsa-miR-182-5p  | RAB5B     | 5869      | PAR-CLIP                                               | Functional MTI (Weak) | 26701625 |
| MIRT738073 | hsa-miR-182-5p  | S100A16   | 140576    | PAR-CLIP                                               | Functional MTI (Weak) | 26701625 |
| MIRT738074 | hsa-miR-182-5p  | SH3BGRL3  | 83442     | PAR-CLIP                                               | Functional MTI (Weak) | 26701625 |
| MIRT738075 | hsa-miR-182-5p  | ZFP36L1   | 677       | PAR-CLIP                                               | Functional MTI (Weak) | 26701625 |
| MIRT763002 | hsa-miR-182-5p  | IL31RA    | 133396    | PAR-CLIP                                               | Functional MTI (Weak) | 27292025 |
| MIRT763003 | hsa-miR-182-5p  | LOX       | 4015      | PAR-CLIP                                               | Functional MTI (Weak) | 27292025 |
| MIRT763004 | hsa-miR-182-5p  | PLAGL2    | 5326      | PAR-CLIP                                               | Functional MTI (Weak) | 27292025 |
| MIRT783958 | hsa-miR-182-5p  | LRTM1     | 57408     | HITS-CLIP                                              | Functional MTI (Weak) | 27418678 |
| MIRT783959 | hsa-miR-182-5p  | TMEM182   | 130827    | HITS-CLIP                                              | Functional MTI (Weak) | 27418678 |
| MIRT790132 | hsa-miR-182-5p  | PFKFB3    | 5209      | HITS-CLIP                                              | Functional MTI (Weak) | 28735896 |
| MIRT790133 | hsa-miR-182-5p  | RGS2      | 5997      | HITS-CLIP                                              | Functional MTI (Weak) | 28735896 |
| MIRT000204 | hsa-miR-200a-3p | DLX5      | 1749      | Luciferase reporter assay                              | Functional MTI        | 19454767 |
| MIRT000730 | hsa-miR-200a-3p | BAP1      | 8314      | Microarray                                             | Functional MTI (Weak) | 17875710 |
| MIRT000772 | hsa-miR-200a-3p | G3BP2     | 9908      | Microarray//Northern blot                              | Functional MTI (Weak) | 16331254 |
| MIRT000773 | hsa-miR-200a-3p | PCDH8     | 5100      | Microarray//Northern blot                              | Functional MTI (Weak) | 16331254 |
| MIRT000774 | hsa-miR-200a-3p | RAB30     | 27314     | Microarray//Northern blot                              | Functional MTI (Weak) | 16331254 |
| MIRT001035 | hsa-miR-200a-3p | ZEB2      | 9839      | Luciferase reporter assay//qRT-PCR                     | Functional MTI        | 18411277 |
| MIRT001175 | hsa-miR-200a-3p | CTNNA1    | 1499      | qRT-PCR//Luciferase reporter assay//Western blot       | Functional MTI        | 19703993 |
| MIRT002480 | hsa-miR-200a-3p | ZEB1      | 6935      | Luciferase reporter assay//Microarray//Western blot    | Functional MTI        | 18376396 |
| MIRT002481 | hsa-miR-200a-3p | GEMIN2    | 8487      | Reporter assay                                         | Functional MTI        | 18381893 |
| MIRT004005 | hsa-miR-200a-3p | PDCD4     | 27250     | Microarray                                             | Functional MTI (Weak) | 17875710 |
| MIRT004006 | hsa-miR-200a-3p | GATA6     | 2627      | Microarray                                             | Functional MTI (Weak) | 17875710 |
| MIRT004007 | hsa-miR-200a-3p | VCAM1     | 7412      | Microarray                                             | Functional MTI (Weak) | 17875710 |

|            |                 |           |        |                                                           |                       |          |
|------------|-----------------|-----------|--------|-----------------------------------------------------------|-----------------------|----------|
| MIRT004400 | hsa-miR-200a-3p | PSMD2     | 5708   | Microarray/Northern blot                                  | Functional MTI (Weak) | 16331254 |
| MIRT004524 | hsa-miR-200a-3p | WASF3     | 10810  | Luciferase reporter assay                                 | Functional MTI        | 19801681 |
| MIRT004549 | hsa-miR-200a-3p | TFRC      | 7037   | Northern blot                                             | Functional MTI (Weak) | 19135902 |
| MIRT004622 | hsa-miR-200a-3p | ZFPM2     | 23414  | Luciferase reporter assay//Western blot//Reporter assay   | Functional MTI        | 20005803 |
| MIRT004867 | hsa-miR-200a-3p | TRAPP2B   | 10597  | Luciferase reporter assay                                 | Functional MTI        | 20835392 |
| MIRT005752 | hsa-miR-200a-3p | GDAP1     | 54332  | Immunofluorescence//In situ hybridization//Luciferase rep | Functional MTI        | 20827281 |
| MIRT006423 | hsa-miR-200a-3p | MAPK14    | 1432   | Luciferase reporter assay//Microarray//Western blot       | Functional MTI        | 22101765 |
| MIRT006665 | hsa-miR-200a-3p | CCNE2     | 9134   | Luciferase reporter assay                                 | Functional MTI        | 22183793 |
| MIRT006704 | hsa-miR-200a-3p | KEAP1     | 9817   | Luciferase reporter assay//qRT-PCR//Western blot          | Functional MTI        | 21914820 |
| MIRT006834 | hsa-miR-200a-3p | SRF       | 6722   | Immunoblot//Luciferase reporter assay//qRT-PCR            | Functional MTI        | 22907787 |
| MIRT007290 | hsa-miR-200a-3p | SMAD2     | 4087   | Luciferase reporter assay                                 | Functional MTI        | 22020340 |
| MIRT007291 | hsa-miR-200a-3p | SMAD3     | 4088   | Luciferase reporter assay                                 | Functional MTI        | 22020340 |
| MIRT007299 | hsa-miR-200a-3p | YAP1      | 10413  | Western blot                                              | Functional MTI        | 23340296 |
| MIRT020343 | hsa-miR-200a-3p | KLHL20    | 27252  | Reporter assay                                            | Functional MTI        | 20005803 |
| MIRT020345 | hsa-miR-200a-3p | PTPRD     | 5789   | Reporter assay                                            | Functional MTI        | 20005803 |
| MIRT020346 | hsa-miR-200a-3p | ELMO2     | 63916  | Reporter assay                                            | Functional MTI        | 20005803 |
| MIRT020347 | hsa-miR-200a-3p | ERBIN     | 55914  | Reporter assay                                            | Functional MTI        | 20005803 |
| MIRT020348 | hsa-miR-200a-3p | WDR37     | 22884  | Reporter assay                                            | Functional MTI        | 20005803 |
| MIRT020349 | hsa-miR-200a-3p | VAC14     | 55697  | Reporter assay                                            | Functional MTI        | 20005803 |
| MIRT020350 | hsa-miR-200a-3p | SHC1      | 6464   | Reporter assay                                            | Functional MTI        | 20005803 |
| MIRT020351 | hsa-miR-200a-3p | TCF7L1    | 83439  | Reporter assay                                            | Functional MTI        | 20005803 |
| MIRT020352 | hsa-miR-200a-3p | RASSF2    | 9770   | Reporter assay                                            | Functional MTI        | 20005803 |
| MIRT020353 | hsa-miR-200a-3p | RIN2      | 54453  | Reporter assay                                            | Functional MTI        | 20005803 |
| MIRT020354 | hsa-miR-200a-3p | HOXB5     | 3215   | Reporter assay                                            | Functional MTI        | 20005803 |
| MIRT020355 | hsa-miR-200a-3p | SEPT7     | 989    | Reporter assay                                            | Functional MTI        | 20005803 |
| MIRT020356 | hsa-miR-200a-3p | KLF11     | 8462   | Reporter assay                                            | Functional MTI        | 20005803 |
| MIRT052922 | hsa-miR-200a-3p | MYB       | 4602   | Flow//Luciferase reporter assay//qRT-PCR//Western blot    | Functional MTI        | 22101269 |
| MIRT053166 | hsa-miR-200a-3p | TFAM      | 7019   | Luciferase reporter assay//Western blot                   | Functional MTI        | 24684598 |
| MIRT053353 | hsa-miR-200a-3p | UBASH3B   | 84959  | Immunohistochemistry//Luciferase reporter assay//Micro    | Functional MTI        | 23784775 |
| MIRT053604 | hsa-miR-200a-3p | TP53      | 7157   | Luciferase reporter assay//Western blot                   | Functional MTI        | 23144891 |
| MIRT054264 | hsa-miR-200a-3p | DNMT1     | 1786   | ChIP-seq//qRT-PCR//Western blot                           | Functional MTI        | 25595591 |
| MIRT054265 | hsa-miR-200a-3p | EZH2      | 2146   | ChIP-seq//qRT-PCR//Western blot                           | Functional MTI        | 25595591 |
| MIRT054371 | hsa-miR-200a-3p | PTEN      | 5728   | qRT-PCR//Western blot                                     | Functional MTI        | 24413994 |
| MIRT054542 | hsa-miR-200a-3p | HFE       | 3077   | Western blot//qRT-PCR                                     | Functional MTI        | 23708087 |
| MIRT054545 | hsa-miR-200a-3p | DLC1      | 10395  | Western blot//qRT-PCR                                     | Functional MTI        | 23708087 |
| MIRT054553 | hsa-miR-200a-3p | ATRX      | 546    | Western blot//qRT-PCR                                     | Functional MTI        | 23708087 |
| MIRT061758 | hsa-miR-200a-3p | PPP1R15B  | 84919  | PAR-CLIP                                                  | Functional MTI (Weak) | 23592263 |
| MIRT072481 | hsa-miR-200a-3p | RAB8B     | 51762  | PAR-CLIP                                                  | Functional MTI (Weak) | 20371350 |
| MIRT078341 | hsa-miR-200a-3p | MED13     | 9969   | PAR-CLIP                                                  | Functional MTI (Weak) | 24398324 |
| MIRT099340 | hsa-miR-200a-3p | QKI       | 9444   | PAR-CLIP                                                  | Functional MTI (Weak) | 20371350 |
| MIRT117486 | hsa-miR-200a-3p | ADNP2     | 22850  | HITS-CLIP                                                 | Functional MTI (Weak) | 23313552 |
| MIRT126445 | hsa-miR-200a-3p | ARL5B     | 221079 | PAR-CLIP                                                  | Functional MTI (Weak) | 23592263 |
| MIRT127537 | hsa-miR-200a-3p | TNKS2     | 80351  | PAR-CLIP                                                  | Functional MTI (Weak) | 21572407 |
| MIRT135564 | hsa-miR-200a-3p | SPRYD4    | 283377 | PAR-CLIP                                                  | Functional MTI (Weak) | 21572407 |
| MIRT145857 | hsa-miR-200a-3p | STAT3     | 6774   | qRT-PCR                                                   | Functional MTI (Weak) | 26535690 |
| MIRT176071 | hsa-miR-200a-3p | OGT       | 8473   | PAR-CLIP                                                  | Functional MTI (Weak) | 23446348 |
| MIRT176153 | hsa-miR-200a-3p | PGK1      | 5230   | PAR-CLIP                                                  | Functional MTI (Weak) | 22012620 |
| MIRT227601 | hsa-miR-200a-3p | ZBTB34    | 403341 | PAR-CLIP                                                  | Functional MTI (Weak) | 23592263 |
| MIRT313184 | hsa-miR-200a-3p | HNRNPAB   | 3182   | PAR-CLIP                                                  | Functional MTI (Weak) | 20371350 |
| MIRT368862 | hsa-miR-200a-3p | IPO5      | 3843   | PAR-CLIP                                                  | Functional MTI (Weak) | 23446348 |
| MIRT437873 | hsa-miR-200a-3p | AREG      | 374    | ELISA//Immunohistochemistry//Immunoprecipitation//Luc     | Functional MTI        | 24762440 |
| MIRT438100 | hsa-miR-200a-3p | GRB2      | 2885   | Luciferase reporter assay                                 | Functional MTI        | 23874841 |
| MIRT438675 | hsa-miR-200a-3p | CDK6      | 1021   | Luciferase reporter assay//qRT-PCR//Western blot          | Functional MTI        | 24009066 |
| MIRT441429 | hsa-miR-200a-3p | STXBP2    | 6813   | PAR-CLIP                                                  | Functional MTI (Weak) | 22100165 |
| MIRT441732 | hsa-miR-200a-3p | SEPT8     | 23176  | PAR-CLIP                                                  | Functional MTI (Weak) | 22100165 |
| MIRT442158 | hsa-miR-200a-3p | DPY19L1   | 23333  | PAR-CLIP                                                  | Functional MTI (Weak) | 22100165 |
| MIRT443389 | hsa-miR-200a-3p | CHML      | 1122   | PAR-CLIP                                                  | Functional MTI (Weak) | 22100165 |
| MIRT447629 | hsa-miR-200a-3p | NDST4     | 64579  | PAR-CLIP                                                  | Functional MTI (Weak) | 22100165 |
| MIRT452254 | hsa-miR-200a-3p | TRAM1     | 23471  | PAR-CLIP                                                  | Functional MTI (Weak) | 23592263 |
| MIRT455748 | hsa-miR-200a-3p | YRDC      | 79693  | PAR-CLIP                                                  | Functional MTI (Weak) | 23592263 |
| MIRT470195 | hsa-miR-200a-3p | PSMD11    | 5717   | PAR-CLIP                                                  | Functional MTI (Weak) | 23592263 |
| MIRT473463 | hsa-miR-200a-3p | MCL1      | 4170   | PAR-CLIP                                                  | Functional MTI (Weak) | 23592263 |
| MIRT478508 | hsa-miR-200a-3p | CYP11B1   | 1545   | PAR-CLIP                                                  | Functional MTI (Weak) | 23592263 |
| MIRT488715 | hsa-miR-200a-3p | BICD2     | 23299  | PAR-CLIP                                                  | Functional MTI (Weak) | 23592263 |
| MIRT498345 | hsa-miR-200a-3p | PRELID2   | 153768 | PAR-CLIP                                                  | Functional MTI (Weak) | 22291592 |
| MIRT500583 | hsa-miR-200a-3p | USP53     | 54532  | PAR-CLIP                                                  | Functional MTI (Weak) | 24398324 |
| MIRT502259 | hsa-miR-200a-3p | HNRNPF    | 3185   | PAR-CLIP                                                  | Functional MTI (Weak) | 24398324 |
| MIRT502310 | hsa-miR-200a-3p | GNA13     | 10672  | PAR-CLIP                                                  | Functional MTI (Weak) | 24398324 |
| MIRT502449 | hsa-miR-200a-3p | FUT11     | 170384 | PAR-CLIP                                                  | Functional MTI (Weak) | 24398324 |
| MIRT502530 | hsa-miR-200a-3p | EPHA2     | 1969   | PAR-CLIP                                                  | Functional MTI (Weak) | 24398324 |
| MIRT503111 | hsa-miR-200a-3p | BRD3      | 8019   | PAR-CLIP                                                  | Functional MTI (Weak) | 24398324 |
| MIRT505323 | hsa-miR-200a-3p | TMOD3     | 29766  | PAR-CLIP                                                  | Functional MTI (Weak) | 23446348 |
| MIRT506628 | hsa-miR-200a-3p | MARCH6    | 10299  | PAR-CLIP                                                  | Functional MTI (Weak) | 23446348 |
| MIRT506861 | hsa-miR-200a-3p | KIAA1147  | 57189  | PAR-CLIP                                                  | Functional MTI (Weak) | 23446348 |
| MIRT519589 | hsa-miR-200a-3p | ZNF805    | 390980 | PAR-CLIP                                                  | Functional MTI (Weak) | 23446348 |
| MIRT519813 | hsa-miR-200a-3p | ZMAT3     | 64393  | PAR-CLIP                                                  | Functional MTI (Weak) | 23446348 |
| MIRT529418 | hsa-miR-200a-3p | MALT1     | 10892  | PAR-CLIP                                                  | Functional MTI (Weak) | 22012620 |
| MIRT536478 | hsa-miR-200a-3p | KIAA1549  | 57670  | PAR-CLIP                                                  | Functional MTI (Weak) | 22012620 |
| MIRT537735 | hsa-miR-200a-3p | ELAVL2    | 1993   | PAR-CLIP                                                  | Functional MTI (Weak) | 22012620 |
| MIRT539039 | hsa-miR-200a-3p | ATXN7L1   | 222255 | PAR-CLIP                                                  | Functional MTI (Weak) | 22012620 |
| MIRT547112 | hsa-miR-200a-3p | PIGW      | 284098 | PAR-CLIP                                                  | Functional MTI (Weak) | 21572407 |
| MIRT548308 | hsa-miR-200a-3p | EPHA7     | 2045   | PAR-CLIP                                                  | Functional MTI (Weak) | 21572407 |
| MIRT549102 | hsa-miR-200a-3p | C18orf25  | 147339 | PAR-CLIP                                                  | Functional MTI (Weak) | 21572407 |
| MIRT554194 | hsa-miR-200a-3p | SLC35D1   | 23169  | PAR-CLIP                                                  | Functional MTI (Weak) | 21572407 |
| MIRT555677 | hsa-miR-200a-3p | PGAM4     | 441531 | PAR-CLIP                                                  | Functional MTI (Weak) | 21572407 |
| MIRT557413 | hsa-miR-200a-3p | H2AFZ     | 3015   | PAR-CLIP                                                  | Functional MTI (Weak) | 21572407 |
| MIRT559958 | hsa-miR-200a-3p | TRMT112   | 51504  | PAR-CLIP                                                  | Functional MTI (Weak) | 20371350 |
| MIRT564938 | hsa-miR-200a-3p | XPOT      | 11260  | PAR-CLIP                                                  | Functional MTI (Weak) | 20371350 |
| MIRT568097 | hsa-miR-200a-3p | CDV3      | 55573  | PAR-CLIP                                                  | Functional MTI (Weak) | 20371350 |
| MIRT573383 | hsa-miR-200a-3p | KIAA1549L | 25758  | PAR-CLIP                                                  | Functional MTI (Weak) | 20371350 |
| MIRT614582 | hsa-miR-200a-3p | LHX1      | 3975   | HITS-CLIP                                                 | Functional MTI (Weak) | 23824327 |
| MIRT632224 | hsa-miR-200a-3p | YME1L1    | 10730  | HITS-CLIP                                                 | Functional MTI (Weak) | 23824327 |
| MIRT634842 | hsa-miR-200a-3p | APOOL     | 139322 | HITS-CLIP                                                 | Functional MTI (Weak) | 23824327 |
| MIRT639525 | hsa-miR-200a-3p | ZNF621    | 285268 | HITS-CLIP                                                 | Functional MTI (Weak) | 23824327 |
| MIRT645300 | hsa-miR-200a-3p | ANGPTL7   | 10218  | HITS-CLIP                                                 | Functional MTI (Weak) | 23824327 |
| MIRT654775 | hsa-miR-200a-3p | PRKAA2    | 5563   | HITS-CLIP                                                 | Functional MTI (Weak) | 23824327 |

|            |                 |           |        |                                                              |                       |          |
|------------|-----------------|-----------|--------|--------------------------------------------------------------|-----------------------|----------|
| MIRT656541 | hsa-miR-200a-3p | MACC1     | 346389 | HITS-CLIP                                                    | Functional MTI (Weak) | 23824327 |
| MIRT663684 | hsa-miR-200a-3p | CCDC18    | 343099 | HITS-CLIP                                                    | Functional MTI (Weak) | 23824327 |
| MIRT682853 | hsa-miR-200a-3p | DNAJC28   | 54943  | HITS-CLIP                                                    | Functional MTI (Weak) | 23706177 |
| MIRT682940 | hsa-miR-200a-3p | ZNF292    | 23036  | HITS-CLIP                                                    | Functional MTI (Weak) | 23706177 |
| MIRT682959 | hsa-miR-200a-3p | RPL12     | 6136   | HITS-CLIP                                                    | Functional MTI (Weak) | 23706177 |
| MIRT683087 | hsa-miR-200a-3p | A1BG      | 1      | HITS-CLIP                                                    | Functional MTI (Weak) | 23706177 |
| MIRT692251 | hsa-miR-200a-3p | POLR3F    | 10621  | HITS-CLIP                                                    | Functional MTI (Weak) | 23313552 |
| MIRT696502 | hsa-miR-200a-3p | COX6B1    | 1340   | HITS-CLIP                                                    | Functional MTI (Weak) | 23313552 |
| MIRT696748 | hsa-miR-200a-3p | RBM28     | 55131  | HITS-CLIP                                                    | Functional MTI (Weak) | 23313552 |
| MIRT702209 | hsa-miR-200a-3p | LPP       | 4026   | HITS-CLIP                                                    | Functional MTI (Weak) | 23313552 |
| MIRT708614 | hsa-miR-200a-3p | CCDC71L   | 168455 | HITS-CLIP                                                    | Functional MTI (Weak) | 19536157 |
| MIRT709036 | hsa-miR-200a-3p | TROVE2    | 6738   | HITS-CLIP                                                    | Functional MTI (Weak) | 19536157 |
| MIRT710918 | hsa-miR-200a-3p | BICRAL    | 23506  | HITS-CLIP                                                    | Functional MTI (Weak) | 19536157 |
| MIRT713191 | hsa-miR-200a-3p | ERO1A     | 30001  | HITS-CLIP                                                    | Functional MTI (Weak) | 19536157 |
| MIRT714497 | hsa-miR-200a-3p | HSPA4     | 3308   | HITS-CLIP                                                    | Functional MTI (Weak) | 19536157 |
| MIRT718596 | hsa-miR-200a-3p | SCD5      | 79966  | HITS-CLIP                                                    | Functional MTI (Weak) | 19536157 |
| MIRT723110 | hsa-miR-200a-3p | CLDND1    | 56650  | HITS-CLIP                                                    | Functional MTI (Weak) | 19536157 |
| MIRT723914 | hsa-miR-200a-3p | PEX11A    | 8800   | HITS-CLIP                                                    | Functional MTI (Weak) | 19536157 |
| MIRT725579 | hsa-miR-200a-3p | CELF1     | 10658  | HITS-CLIP                                                    | Functional MTI (Weak) | 19536157 |
| MIRT731049 | hsa-miR-200a-3p | MYH10     | 4628   | Luciferase reporter assay//Western blot                      | Functional MTI        | 24858044 |
| MIRT731785 | hsa-miR-200a-3p | SPAG9     | 9043   | Luciferase reporter assay//qRT-PCR//Western blot             | Functional MTI        | 26797273 |
| MIRT732234 | hsa-miR-200a-3p | TGFB2     | 7042   | Luciferase reporter assay//qRT-PCR//Western blot             | Functional MTI        | 27267902 |
| MIRT732658 | hsa-miR-200a-3p | foxg1a    | 30274  | Western blot                                                 | Functional MTI        | 25937343 |
| MIRT732985 | hsa-miR-200a-3p | DEK       | 7913   | Immunohistochemistry//Luciferase reporter assay//qRT-PCR     | Functional MTI        | 26947878 |
| MIRT733513 | hsa-miR-200a-3p | THRB      | 7068   | Luciferase reporter assay//Next Generation Sequencing (NGS)  | Functional MTI        | 27734462 |
| MIRT733772 | hsa-miR-200a-3p | MFF       | 56947  | Immunofluorescence//Western blot                             | Functional MTI        | 28148392 |
| MIRT734407 | hsa-miR-200a-3p | GJA1      | 2697   | Luciferase reporter assay//qRT-PCR//Western blot             | Functional MTI        | 26283635 |
| MIRT734700 | hsa-miR-200a-3p | HGF       | 3082   | qRT-PCR//Western blot                                        | Functional MTI        | 27374174 |
| MIRT734965 | hsa-miR-200a-3p | DICER1    | 23405  | qRT-PCR                                                      | Functional MTI (Weak) | 25768283 |
| MIRT735206 | hsa-miR-200a-3p | FOXA2     | 3170   | Luciferase reporter assay//qRT-PCR//Western blot             | Functional MTI        | 28367241 |
| MIRT735283 | hsa-miR-200a-3p | HMGGB1    | 3146   | ELISA//Luciferase reporter assay//qRT-PCR//Western blot      | Functional MTI        | 28403886 |
| MIRT735284 | hsa-miR-200a-3p | TP73-AS1  | 57212  | ELISA//Luciferase reporter assay//qRT-PCR//Western blot      | Functional MTI        | 28403886 |
| MIRT735329 | hsa-miR-200a-3p | MALAT1    | 378938 | Luciferase reporter assay//qRT-PCR                           | Functional MTI        | 26461224 |
| MIRT735389 | hsa-miR-200a-3p | MNX1      | 3110   | Luciferase reporter assay//qRT-PCR//Western blot             | Functional MTI        | 26801823 |
| MIRT735444 | hsa-miR-200a-3p | EGFR      | 1956   | Western blot                                                 | Functional MTI        | 28057023 |
| MIRT738760 | hsa-miR-200a-3p | C16orf58  | 64755  | PAR-CLIP                                                     | Functional MTI (Weak) | 26701625 |
| MIRT738761 | hsa-miR-200a-3p | IRF2BPL   | 64207  | PAR-CLIP                                                     | Functional MTI (Weak) | 26701625 |
| MIRT763653 | hsa-miR-200a-3p | KLF12     | 11278  | PAR-CLIP                                                     | Functional MTI (Weak) | 27292025 |
| MIRT763654 | hsa-miR-200a-3p | MDM4      | 4194   | PAR-CLIP                                                     | Functional MTI (Weak) | 27292025 |
| MIRT763655 | hsa-miR-200a-3p | PHB2      | 11331  | PAR-CLIP                                                     | Functional MTI (Weak) | 27292025 |
| MIRT763656 | hsa-miR-200a-3p | RAP2C     | 57826  | PAR-CLIP                                                     | Functional MTI (Weak) | 27292025 |
| MIRT763657 | hsa-miR-200a-3p | TNFRSF10B | 8795   | PAR-CLIP                                                     | Functional MTI (Weak) | 27292025 |
| MIRT790156 | hsa-miR-200a-3p | UQCERS1   | 7386   | HITS-CLIP                                                    | Functional MTI (Weak) | 27355896 |
| MIRT000198 | hsa-miR-200b-3p | PTPN12    | 5782   | Northern blot//qRT-PCR//Western blot                         | Functional MTI        | 16762633 |
| MIRT000723 | hsa-miR-200b-3p | ZEB2      | 9839   | Luciferase reporter assay//qRT-PCR                           | Functional MTI        | 18411277 |
| MIRT000724 | hsa-miR-200b-3p | BAP1      | 8314   | Microarray                                                   | Functional MTI (Weak) | 17875710 |
| MIRT002483 | hsa-miR-200b-3p | ZEB1      | 6935   | Luciferase reporter assay//qRT-PCR//Reporter assay           | Functional MTI        | 18411277 |
| MIRT002987 | hsa-miR-200b-3p | RERE      | 473    | Luciferase reporter assay                                    | Functional MTI        | 17923093 |
| MIRT003599 | hsa-miR-200b-3p | EP300     | 2033   | Microarray                                                   | Functional MTI (Weak) | 19569050 |
| MIRT003783 | hsa-miR-200b-3p | ETS1      | 2113   | Immunocytochemistry//Luciferase reporter assay//qRT-PCR      | Functional MTI        | 21081489 |
| MIRT004008 | hsa-miR-200b-3p | GATA4     | 2626   | Microarray                                                   | Functional MTI (Weak) | 17875710 |
| MIRT004009 | hsa-miR-200b-3p | FN1       | 2335   | Microarray                                                   | Functional MTI (Weak) | 17875710 |
| MIRT004296 | hsa-miR-200b-3p | WASF3     | 10810  | Luciferase reporter assay//qRT-PCR                           | Functional MTI        | 19801681 |
| MIRT004623 | hsa-miR-200b-3p | ZFPM2     | 23414  | Luciferase reporter assay//Western blot//Reporter assay      | Functional MTI        | 20005803 |
| MIRT005035 | hsa-miR-200b-3p | MATR3     | 9782   | Luciferase reporter assay//Microarray//qRT-PCR               | Functional MTI        | 19849700 |
| MIRT006163 | hsa-miR-200b-3p | RNF2      | 6045   | Luciferase reporter assay//Microarray//qRT-PCR//Western blot | Functional MTI        | 21840484 |
| MIRT006165 | hsa-miR-200b-3p | BMI1      | 648    | Luciferase reporter assay//Microarray//qRT-PCR//Western blot | Functional MTI        | 21840484 |
| MIRT006298 | hsa-miR-200b-3p | E2F3      | 1871   | Flow//Luciferase reporter assay//Western blot                | Functional MTI        | 22139708 |
| MIRT006440 | hsa-miR-200b-3p | VEGFA     | 7422   | Luciferase reporter assay//Western blot                      | Functional MTI        | 21544626 |
| MIRT006441 | hsa-miR-200b-3p | FLT1      | 2321   | Luciferase reporter assay//Western blot                      | Functional MTI        | 21544626 |
| MIRT006442 | hsa-miR-200b-3p | KDR       | 3791   | Luciferase reporter assay//Western blot                      | Functional MTI        | 21544626 |
| MIRT006511 | hsa-miR-200b-3p | RND3      | 390    | Luciferase reporter assay                                    | Functional MTI        | 20683643 |
| MIRT006666 | hsa-miR-200b-3p | CCNE2     | 9134   | Luciferase reporter assay                                    | Functional MTI        | 22183793 |
| MIRT006670 | hsa-miR-200b-3p | BCL2      | 596    | Luciferase reporter assay//qRT-PCR//Western blot             | Functional MTI        | 21993663 |
| MIRT006671 | hsa-miR-200b-3p | XIAP      | 331    | Luciferase reporter assay//qRT-PCR//Western blot             | Functional MTI        | 21993663 |
| MIRT007322 | hsa-miR-200b-3p | SMAD2     | 4087   | Luciferase reporter assay                                    | Functional MTI        | 23492772 |
| MIRT007342 | hsa-miR-200b-3p | CREB1     | 1385   | Luciferase reporter assay//qRT-PCR//Western blot             | Functional MTI        | 23543137 |
| MIRT024121 | hsa-miR-200b-3p | KLHL20    | 27252  | Reporter assay                                               | Functional MTI        | 20005803 |
| MIRT024122 | hsa-miR-200b-3p | ELMO2     | 63916  | Reporter assay                                               | Functional MTI        | 20005803 |
| MIRT024123 | hsa-miR-200b-3p | PTPRD     | 5789   | Reporter assay                                               | Functional MTI        | 20005803 |
| MIRT024124 | hsa-miR-200b-3p | ERRF1     | 54206  | PAR-CLIP                                                     | Functional MTI (Weak) | 26701625 |
| MIRT024125 | hsa-miR-200b-3p | ERBIN     | 55914  | Reporter assay                                               | Functional MTI        | 20005803 |
| MIRT024126 | hsa-miR-200b-3p | WDR37     | 22884  | Reporter assay                                               | Functional MTI        | 20005803 |
| MIRT024127 | hsa-miR-200b-3p | TCF7L1    | 83439  | Reporter assay                                               | Functional MTI        | 20005803 |
| MIRT024128 | hsa-miR-200b-3p | VAC14     | 55697  | Reporter assay                                               | Functional MTI        | 20005803 |
| MIRT024129 | hsa-miR-200b-3p | HOXB5     | 3215   | Reporter assay                                               | Functional MTI        | 20005803 |
| MIRT024130 | hsa-miR-200b-3p | RIN2      | 54453  | Reporter assay                                               | Functional MTI        | 20005803 |
| MIRT024131 | hsa-miR-200b-3p | RASSF2    | 9770   | Reporter assay                                               | Functional MTI        | 20005803 |
| MIRT024132 | hsa-miR-200b-3p | KLF11     | 8462   | Reporter assay                                               | Functional MTI        | 20005803 |
| MIRT024133 | hsa-miR-200b-3p | SEPT7     | 989    | Reporter assay                                               | Functional MTI        | 20005803 |
| MIRT024134 | hsa-miR-200b-3p | SHC1      | 6464   | Reporter assay                                               | Functional MTI        | 20005803 |
| MIRT046569 | hsa-miR-200b-3p | SUPV3L1   | 6832   | CLASH                                                        | Functional MTI (Weak) | 23622248 |
| MIRT052923 | hsa-miR-200b-3p | MYB       | 4602   | Flow//Luciferase reporter assay//qRT-PCR//Western blot       | Functional MTI        | 22101269 |
| MIRT053342 | hsa-miR-200b-3p | QRSL1     | 55278  | Luciferase reporter assay//qRT-PCR//Western blot             | Functional MTI        | 22499991 |
| MIRT053529 | hsa-miR-200b-3p | SUZ12     | 23512  | ChIP-seq//Flow//Luciferase reporter assay//Western blot      | Functional MTI        | 23735840 |
| MIRT053535 | hsa-miR-200b-3p | WNT1      | 7471   | Immunohistochemistry//Luciferase reporter assay//Microarray  | Functional MTI        | 23851184 |
| MIRT053568 | hsa-miR-200b-3p | DNMT3A    | 1788   | In situ hybridization//Luciferase reporter assay//qRT-PCR    | Functional MTI        | 23995857 |
| MIRT053569 | hsa-miR-200b-3p | DNMT3B    | 1789   | In situ hybridization//Luciferase reporter assay//qRT-PCR    | Functional MTI        | 23995857 |
| MIRT053570 | hsa-miR-200b-3p | SP1       | 6667   | In situ hybridization//Luciferase reporter assay//qRT-PCR    | Functional MTI        | 23995857 |
| MIRT053625 | hsa-miR-200b-3p | MSN       | 4478   | Immunofluorescence//Immunohistochemistry//Luciferase         | Functional MTI        | 24037528 |
| MIRT054266 | hsa-miR-200b-3p | DNMT1     | 1786   | ChIP-seq//qRT-PCR//Western blot                              | Functional MTI        | 25595591 |
| MIRT054267 | hsa-miR-200b-3p | EZH2      | 2146   | ChIP-seq//qRT-PCR//Western blot                              | Functional MTI        | 25595591 |
| MIRT054541 | hsa-miR-200b-3p | HFE       | 3077   | Western blot//qRT-PCR                                        | Functional MTI        | 23708087 |
| MIRT054548 | hsa-miR-200b-3p | DLC1      | 10395  | Western blot//qRT-PCR                                        | Functional MTI        | 23708087 |
| MIRT054550 | hsa-miR-200b-3p | HNRNPA3   | 220988 | Western blot//qRT-PCR                                        | Functional MTI        | 23708087 |
| MIRT054683 | hsa-miR-200b-3p | FERMT2    | 10979  | Immunofluorescence//Immunohistochemistry//Luciferase         | Functional MTI        | 24064224 |

|            |                 |          |        |                                                                                                    |                       |          |
|------------|-----------------|----------|--------|----------------------------------------------------------------------------------------------------|-----------------------|----------|
| MIRT054844 | hsa-miR-200b-3p | RAB21    | 23011  | Luciferase reporter assay//qRT-PCR//Western blot                                                   | Functional MTI        | 24447584 |
| MIRT054845 | hsa-miR-200b-3p | RAB3B    | 5865   | Luciferase reporter assay//qRT-PCR//Western blot                                                   | Functional MTI        | 24447584 |
| MIRT054885 | hsa-miR-200b-3p | RAB18    | 22931  | Luciferase reporter assay//qRT-PCR//Western blot                                                   | Functional MTI        | 24477653 |
| MIRT054886 | hsa-miR-200b-3p | RAB23    | 51715  | Luciferase reporter assay//qRT-PCR//Western blot                                                   | Functional MTI        | 24477653 |
| MIRT054917 | hsa-miR-200b-3p | OXR1     | 55074  | Luciferase reporter assay//qRT-PCR//Western blot                                                   | Functional MTI        | 23404117 |
| MIRT063868 | hsa-miR-200b-3p | RASSF8   | 11228  | PAR-CLIP                                                                                           | Functional MTI (Weak) | 23592263 |
| MIRT080631 | hsa-miR-200b-3p | PMAIP1   | 5366   | PAR-CLIP                                                                                           | Functional MTI (Weak) | 21572407 |
| MIRT100486 | hsa-miR-200b-3p | UHRF1BP1 | 54887  | PAR-CLIP                                                                                           | Functional MTI (Weak) | 21572407 |
| MIRT106295 | hsa-miR-200b-3p | ZFHX4    | 79776  | PAR-CLIP                                                                                           | Functional MTI (Weak) | 23446348 |
| MIRT108446 | hsa-miR-200b-3p | ACSL4    | 2182   | PAR-CLIP                                                                                           | Functional MTI (Weak) | 22100165 |
| MIRT143030 | hsa-miR-200b-3p | SHCBP1   | 79801  | PAR-CLIP                                                                                           | Functional MTI (Weak) | 22012620 |
| MIRT157710 | hsa-miR-200b-3p | CAB39    | 51719  | PAR-CLIP                                                                                           | Functional MTI (Weak) | 24398324 |
| MIRT159114 | hsa-miR-200b-3p | NRBP1    | 29959  | PAR-CLIP                                                                                           | Functional MTI (Weak) | 24398324 |
| MIRT204208 | hsa-miR-200b-3p | ATP5G3   | 518    | PAR-CLIP                                                                                           | Functional MTI (Weak) | 21572407 |
| MIRT209178 | hsa-miR-200b-3p | ZMAT3    | 64393  | PAR-CLIP                                                                                           | Functional MTI (Weak) | 24398324 |
| MIRT212861 | hsa-miR-200b-3p | N4BP2    | 55728  | PAR-CLIP                                                                                           | Functional MTI (Weak) | 22100165 |
| MIRT218291 | hsa-miR-200b-3p | QKI      | 9444   | PAR-CLIP                                                                                           | Functional MTI (Weak) | 24398324 |
| MIRT243811 | hsa-miR-200b-3p | ANKRD33B | 651746 | PAR-CLIP                                                                                           | Functional MTI (Weak) | 23592263 |
| MIRT244404 | hsa-miR-200b-3p | DNAJB6   | 10049  | PAR-CLIP                                                                                           | Functional MTI (Weak) | 24398324 |
| MIRT245588 | hsa-miR-200b-3p | DDIT4    | 54541  | PAR-CLIP                                                                                           | Functional MTI (Weak) | 23446348 |
| MIRT271934 | hsa-miR-200b-3p | KLHL42   | 57542  | PAR-CLIP                                                                                           | Functional MTI (Weak) | 23446348 |
| MIRT278144 | hsa-miR-200b-3p | FOXG1    | 2290   | Luciferase reporter assay                                                                          | Functional MTI        | 27044840 |
| MIRT296344 | hsa-miR-200b-3p | PARD6B   | 84612  | PAR-CLIP                                                                                           | Functional MTI (Weak) | 22012620 |
| MIRT319179 | hsa-miR-200b-3p | DNAJB9   | 4189   | PAR-CLIP                                                                                           | Functional MTI (Weak) | 24398324 |
| MIRT329852 | hsa-miR-200b-3p | SHOC2    | 8036   | PAR-CLIP                                                                                           | Functional MTI (Weak) | 20371350 |
| MIRT344584 | hsa-miR-200b-3p | NUFIP2   | 57532  | PAR-CLIP                                                                                           | Functional MTI (Weak) | 20371350 |
| MIRT437862 | hsa-miR-200b-3p | NOTCH1   | 4851   | Luciferase reporter assay//qRT-PCR//Western blot                                                   | Functional MTI        | 23955600 |
| MIRT437874 | hsa-miR-200b-3p | BTC      | 685    | ELISA//Immunohistochemistry//Immunoprecipitation//Luciferase reporter assay//qRT-PCR//Western blot | Functional MTI        | 24762440 |
| MIRT437988 | hsa-miR-200b-3p | CDKN1B   | 1027   | PAR-CLIP                                                                                           | Functional MTI (Weak) | 20371350 |
| MIRT438051 | hsa-miR-200b-3p | LOX      | 4015   | Luciferase reporter assay//qRT-PCR//Western blot                                                   | Functional MTI        | 23975428 |
| MIRT438165 | hsa-miR-200b-3p | PHLPP1   | 23239  | Luciferase reporter assay//Northern blot/qRT-PCR//Western blot                                     | Functional MTI        | 24337069 |
| MIRT438166 | hsa-miR-200b-3p | SEC23A   | 10484  | PAR-CLIP                                                                                           | Functional MTI (Weak) | 23592263 |
| MIRT438204 | hsa-miR-200b-3p | ROCK2    | 9475   | Luciferase reporter assay                                                                          | Functional MTI        | 24169343 |
| MIRT438291 | hsa-miR-200b-3p | PIN1     | 5300   | Luciferase reporter assay                                                                          | Functional MTI        | 24072701 |
| MIRT438476 | hsa-miR-200b-3p | DDX53    | 168400 | Luciferase reporter assay                                                                          | Functional MTI        | 24174534 |
| MIRT444900 | hsa-miR-200b-3p | PHF14    | 9678   | PAR-CLIP                                                                                           | Functional MTI (Weak) | 22100165 |
| MIRT447579 | hsa-miR-200b-3p | CDC14B   | 8555   | PAR-CLIP                                                                                           | Functional MTI (Weak) | 22100165 |
| MIRT449890 | hsa-miR-200b-3p | ZNF621   | 285268 | PAR-CLIP                                                                                           | Functional MTI (Weak) | 22100165 |
| MIRT450413 | hsa-miR-200b-3p | CACNG8   | 59283  | PAR-CLIP                                                                                           | Functional MTI (Weak) | 22100165 |
| MIRT451990 | hsa-miR-200b-3p | FKBP5    | 2289   | PAR-CLIP                                                                                           | Functional MTI (Weak) | 23592263 |
| MIRT473906 | hsa-miR-200b-3p | M6PR     | 4074   | PAR-CLIP                                                                                           | Functional MTI (Weak) | 23592263 |
| MIRT474749 | hsa-miR-200b-3p | KIF13A   | 63971  | PAR-CLIP                                                                                           | Functional MTI (Weak) | 23592263 |
| MIRT478184 | hsa-miR-200b-3p | DENND5B  | 160518 | PAR-CLIP                                                                                           | Functional MTI (Weak) | 23592263 |
| MIRT488806 | hsa-miR-200b-3p | MALT1    | 10892  | PAR-CLIP                                                                                           | Functional MTI (Weak) | 23592263 |
| MIRT497728 | hsa-miR-200b-3p | CYPIA1   | 1543   | PAR-CLIP                                                                                           | Functional MTI (Weak) | 22291592 |
| MIRT498688 | hsa-miR-200b-3p | SERPINH1 | 871    | PAR-CLIP                                                                                           | Functional MTI (Weak) | 24398324 |
| MIRT499209 | hsa-miR-200b-3p | TJAP1    | 93643  | PAR-CLIP                                                                                           | Functional MTI (Weak) | 24398324 |
| MIRT499298 | hsa-miR-200b-3p | TPD52L1  | 7164   | PAR-CLIP                                                                                           | Functional MTI (Weak) | 24398324 |
| MIRT499786 | hsa-miR-200b-3p | CASP2    | 835    | PAR-CLIP                                                                                           | Functional MTI (Weak) | 24398324 |
| MIRT499851 | hsa-miR-200b-3p | AVPR1A   | 552    | PAR-CLIP                                                                                           | Functional MTI (Weak) | 24398324 |
| MIRT499929 | hsa-miR-200b-3p | GPX8     | 493869 | PAR-CLIP                                                                                           | Functional MTI (Weak) | 24398324 |
| MIRT499960 | hsa-miR-200b-3p | ABI2     | 10152  | PAR-CLIP                                                                                           | Functional MTI (Weak) | 24398324 |
| MIRT500165 | hsa-miR-200b-3p | CLEC2D   | 29121  | PAR-CLIP                                                                                           | Functional MTI (Weak) | 24398324 |
| MIRT500609 | hsa-miR-200b-3p | UBE2D1   | 7321   | PAR-CLIP                                                                                           | Functional MTI (Weak) | 24398324 |
| MIRT500743 | hsa-miR-200b-3p | TP53INP1 | 94241  | PAR-CLIP                                                                                           | Functional MTI (Weak) | 24398324 |
| MIRT500827 | hsa-miR-200b-3p | ELOC     | 6921   | PAR-CLIP                                                                                           | Functional MTI (Weak) | 24398324 |
| MIRT500837 | hsa-miR-200b-3p | TBK1     | 29110  | PAR-CLIP                                                                                           | Functional MTI (Weak) | 24398324 |
| MIRT501488 | hsa-miR-200b-3p | PRRG4    | 79056  | PAR-CLIP                                                                                           | Functional MTI (Weak) | 24398324 |
| MIRT501594 | hsa-miR-200b-3p | PLCG1    | 5335   | PAR-CLIP                                                                                           | Functional MTI (Weak) | 24398324 |
| MIRT501842 | hsa-miR-200b-3p | NCOA2    | 10499  | PAR-CLIP                                                                                           | Functional MTI (Weak) | 24398324 |
| MIRT502084 | hsa-miR-200b-3p | KRAS     | 3845   | PAR-CLIP                                                                                           | Functional MTI (Weak) | 24398324 |
| MIRT502178 | hsa-miR-200b-3p | JUN      | 3725   | PAR-CLIP                                                                                           | Functional MTI (Weak) | 24398324 |
| MIRT502837 | hsa-miR-200b-3p | CELF1    | 10658  | PAR-CLIP                                                                                           | Functional MTI (Weak) | 24398324 |
| MIRT502959 | hsa-miR-200b-3p | CCNT2    | 905    | PAR-CLIP                                                                                           | Functional MTI (Weak) | 24398324 |
| MIRT503131 | hsa-miR-200b-3p | BAG4     | 9530   | PAR-CLIP                                                                                           | Functional MTI (Weak) | 24398324 |
| MIRT505280 | hsa-miR-200b-3p | TUBB2A   | 7280   | PAR-CLIP                                                                                           | Functional MTI (Weak) | 23446348 |
| MIRT505430 | hsa-miR-200b-3p | TCF7L2   | 6934   | PAR-CLIP                                                                                           | Functional MTI (Weak) | 23446348 |
| MIRT511849 | hsa-miR-200b-3p | GPATC8   | 23131  | PAR-CLIP                                                                                           | Functional MTI (Weak) | 23446348 |
| MIRT513408 | hsa-miR-200b-3p | LMNB1    | 4001   | PAR-CLIP                                                                                           | Functional MTI (Weak) | 23446348 |
| MIRT528183 | hsa-miR-200b-3p | C6orf47  | 57827  | PAR-CLIP                                                                                           | Functional MTI (Weak) | 22012620 |
| MIRT530669 | hsa-miR-200b-3p | TRIM56   | 81844  | PAR-CLIP                                                                                           | Functional MTI (Weak) | 22012620 |
| MIRT530836 | hsa-miR-200b-3p | MAPK7    | 5598   | PAR-CLIP                                                                                           | Functional MTI (Weak) | 22012620 |
| MIRT531134 | hsa-miR-200b-3p | CLPB     | 81570  | PAR-CLIP                                                                                           | Functional MTI (Weak) | 22012620 |
| MIRT531393 | hsa-miR-200b-3p | TXNDC16  | 57544  | PAR-CLIP                                                                                           | Functional MTI (Weak) | 22012620 |
| MIRT533348 | hsa-miR-200b-3p | UNC119B  | 84747  | PAR-CLIP                                                                                           | Functional MTI (Weak) | 22012620 |
| MIRT533791 | hsa-miR-200b-3p | TMEM119  | 338773 | PAR-CLIP                                                                                           | Functional MTI (Weak) | 22012620 |
| MIRT533975 | hsa-miR-200b-3p | TAF1D    | 79101  | PAR-CLIP                                                                                           | Functional MTI (Weak) | 22012620 |
| MIRT535530 | hsa-miR-200b-3p | PAK2     | 5062   | PAR-CLIP                                                                                           | Functional MTI (Weak) | 22012620 |
| MIRT535670 | hsa-miR-200b-3p | NLGN4X   | 57502  | PAR-CLIP                                                                                           | Functional MTI (Weak) | 22012620 |
| MIRT537615 | hsa-miR-200b-3p | ERMP1    | 79956  | PAR-CLIP                                                                                           | Functional MTI (Weak) | 22012620 |
| MIRT540709 | hsa-miR-200b-3p | PDPK1    | 5170   | PAR-CLIP                                                                                           | Functional MTI (Weak) | 21572407 |
| MIRT549052 | hsa-miR-200b-3p | CAMSAP2  | 23271  | PAR-CLIP                                                                                           | Functional MTI (Weak) | 21572407 |
| MIRT557648 | hsa-miR-200b-3p | GATA6    | 2627   | PAR-CLIP                                                                                           | Functional MTI (Weak) | 21572407 |
| MIRT557786 | hsa-miR-200b-3p | FRS2     | 10818  | PAR-CLIP                                                                                           | Functional MTI (Weak) | 21572407 |
| MIRT558564 | hsa-miR-200b-3p | CRLF3    | 51379  | PAR-CLIP                                                                                           | Functional MTI (Weak) | 21572407 |
| MIRT558829 | hsa-miR-200b-3p | CDCA4    | 55038  | PAR-CLIP                                                                                           | Functional MTI (Weak) | 21572407 |
| MIRT564438 | hsa-miR-200b-3p | YEATS4   | 8089   | PAR-CLIP                                                                                           | Functional MTI (Weak) | 20371350 |
| MIRT566768 | hsa-miR-200b-3p | MLLT10   | 8028   | PAR-CLIP                                                                                           | Functional MTI (Weak) | 20371350 |
| MIRT568295 | hsa-miR-200b-3p | BBX      | 56987  | PAR-CLIP                                                                                           | Functional MTI (Weak) | 20371350 |
| MIRT570299 | hsa-miR-200b-3p | ARPC3    | 10094  | PAR-CLIP                                                                                           | Functional MTI (Weak) | 20371350 |
| MIRT571758 | hsa-miR-200b-3p | PSD3     | 23362  | PAR-CLIP                                                                                           | Functional MTI (Weak) | 20371350 |
| MIRT573139 | hsa-miR-200b-3p | ABT1     | 29777  | PAR-CLIP                                                                                           | Functional MTI (Weak) | 20371350 |
| MIRT616923 | hsa-miR-200b-3p | PPM1H    | 57460  | HITS-CLIP                                                                                          | Functional MTI (Weak) | 23824327 |
| MIRT640091 | hsa-miR-200b-3p | INO80D   | 54891  | HITS-CLIP                                                                                          | Functional MTI (Weak) | 23824327 |
| MIRT640649 | hsa-miR-200b-3p | IGF2     | 3481   | HITS-CLIP                                                                                          | Functional MTI (Weak) | 23824327 |
| MIRT661419 | hsa-miR-200b-3p | FAM216B  | 144809 | HITS-CLIP                                                                                          | Functional MTI (Weak) | 23824327 |

|            |                 |           |        |                                                         |                       |          |
|------------|-----------------|-----------|--------|---------------------------------------------------------|-----------------------|----------|
| MIRT664728 | hsa-miR-200b-3p | PTPN4     | 5775   | HITS-CLIP                                               | Functional MTI (Weak) | 23824327 |
| MIRT686617 | hsa-miR-200b-3p | TMEM70    | 54968  | HITS-CLIP                                               | Functional MTI (Weak) | 23313552 |
| MIRT686764 | hsa-miR-200b-3p | STX16     | 8675   | HITS-CLIP                                               | Functional MTI (Weak) | 23313552 |
| MIRT699807 | hsa-miR-200b-3p | SEC24A    | 10802  | HITS-CLIP                                               | Functional MTI (Weak) | 23313552 |
| MIRT701748 | hsa-miR-200b-3p | MTDH      | 92140  | HITS-CLIP                                               | Functional MTI (Weak) | 23313552 |
| MIRT711054 | hsa-miR-200b-3p | IRS1      | 3667   | HITS-CLIP                                               | Functional MTI (Weak) | 19536157 |
| MIRT721943 | hsa-miR-200b-3p | NGRN      | 51335  | HITS-CLIP                                               | Functional MTI (Weak) | 19536157 |
| MIRT723590 | hsa-miR-200b-3p | PABPC1    | 26986  | HITS-CLIP                                               | Functional MTI (Weak) | 19536157 |
| MIRT731596 | hsa-miR-200b-3p | RHOA      | 387    | Luciferase reporter assay                               | Functional MTI        | 26903801 |
| MIRT733087 | hsa-miR-200b-3p | ADAM12    | 8038   | Luciferase reporter assay//qRT-PCR//Western blot        | Functional MTI        | 25886595 |
| MIRT733564 | hsa-miR-200b-3p | ETV5      | 2119   | qRT-PCR//Western blot                                   | Functional MTI        | 27276064 |
| MIRT733587 | hsa-miR-200b-3p | ATG12     | 9140   | //qRT-PCR//Western blot//Luciferase reporter assay      | Functional MTI        | 26416454 |
| MIRT733739 | hsa-miR-200b-3p | CD274     | 29126  | Flow//Immunofluorescence//Luciferase reporter assay//qR | Functional MTI        | 28056089 |
| MIRT733756 | hsa-miR-200b-3p | IKKBK     | 3551   | Luciferase reporter assay//qRT-PCR//Western blot        | Functional MTI        | 26433127 |
| MIRT734229 | hsa-miR-200b-3p | LDHA      | 3939   | Luciferase reporter assay//qRT-PCR//Western blot        | Functional MTI        | 27374173 |
| MIRT734346 | hsa-miR-200b-3p | CRKL      | 1399   | Luciferase reporter assay//qRT-PCR//Western blot        | Functional MTI        | 26079153 |
| MIRT735330 | hsa-miR-200b-3p | MALAT1    | 378938 | Luciferase reporter assay//qRT-PCR                      | Functional MTI        | 26461224 |
| MIRT735429 | hsa-miR-200b-3p | FSCN1     | 6624   | Luciferase reporter assay//qRT-PCR//Western blot        | Functional MTI        | 27356635 |
| MIRT738763 | hsa-miR-200b-3p | ARHGDI3   | 396    | PAR-CLIP                                                | Functional MTI (Weak) | 26701625 |
| MIRT738764 | hsa-miR-200b-3p | DCBLD2    | 131566 | PAR-CLIP                                                | Functional MTI (Weak) | 26701625 |
| MIRT738765 | hsa-miR-200b-3p | GOT1      | 2805   | PAR-CLIP                                                | Functional MTI (Weak) | 26701625 |
| MIRT738766 | hsa-miR-200b-3p | MKNK2     | 2872   | PAR-CLIP                                                | Functional MTI (Weak) | 26701625 |
| MIRT738767 | hsa-miR-200b-3p | PKD1      | 5310   | PAR-CLIP                                                | Functional MTI (Weak) | 26701625 |
| MIRT738768 | hsa-miR-200b-3p | PPP1R18   | 170954 | PAR-CLIP                                                | Functional MTI (Weak) | 26701625 |
| MIRT738769 | hsa-miR-200b-3p | RTL8C     | 8933   | PAR-CLIP                                                | Functional MTI (Weak) | 26701625 |
| MIRT738770 | hsa-miR-200b-3p | SESN1     | 27244  | PAR-CLIP                                                | Functional MTI (Weak) | 26701625 |
| MIRT738771 | hsa-miR-200b-3p | SHOX2     | 6474   | PAR-CLIP                                                | Functional MTI (Weak) | 26701625 |
| MIRT738772 | hsa-miR-200b-3p | TUBB      | 203068 | PAR-CLIP                                                | Functional MTI (Weak) | 26701625 |
| MIRT738773 | hsa-miR-200b-3p | WNT16     | 51384  | PAR-CLIP                                                | Functional MTI (Weak) | 26701625 |
| MIRT763660 | hsa-miR-200b-3p | ATP6V1E1  | 529    | PAR-CLIP                                                | Functional MTI (Weak) | 27292025 |
| MIRT763661 | hsa-miR-200b-3p | BCL2L11   | 10018  | PAR-CLIP                                                | Functional MTI (Weak) | 27292025 |
| MIRT763662 | hsa-miR-200b-3p | MAMLD1    | 10046  | PAR-CLIP                                                | Functional MTI (Weak) | 27292025 |
| MIRT763663 | hsa-miR-200b-3p | MBD5      | 55777  | PAR-CLIP                                                | Functional MTI (Weak) | 27292025 |
| MIRT763664 | hsa-miR-200b-3p | OSTM1     | 28962  | PAR-CLIP                                                | Functional MTI (Weak) | 27292025 |
| MIRT763665 | hsa-miR-200b-3p | RAP2C     | 57826  | PAR-CLIP                                                | Functional MTI (Weak) | 27292025 |
| MIRT763666 | hsa-miR-200b-3p | SECISBP2L | 9728   | PAR-CLIP                                                | Functional MTI (Weak) | 27292025 |
| MIRT784124 | hsa-miR-200b-3p | C21orf91  | 54149  | HITS-CLIP                                               | Functional MTI (Weak) | 27418678 |

| miRTarBase ID | miRNA          | Target Gene | Target Gene<br>(Entrez Gene ID) | Experiments                                                             | Support Type              | References (PMID) |
|---------------|----------------|-------------|---------------------------------|-------------------------------------------------------------------------|---------------------------|-------------------|
| MIRT000002    | hsa-miR-20a-5p | HIF1A       | 3091                            | Luciferase reporter assay/Western blot/Northern blot/qRT-PCR            | Functional MTI            | 18632605          |
| MIRT000178    | hsa-miR-20a-5p | TCEAL1      | 9338                            | Luciferase reporter assay/Microarray/Northern blot/qRT-PCR/Western blot | Functional MTI            | 23059786          |
| MIRT000179    | hsa-miR-20a-5p | CCND1       | 595                             | Luciferase reporter assay/qRT-PCR/Western blot                          | Functional MTI            | 18695042          |
| MIRT000180    | hsa-miR-20a-5p | E2F1        | 1869                            | Western blot                                                            | Functional MTI            | 19110058          |
| MIRT000181    | hsa-miR-20a-5p | BMP2        | 659                             | Luciferase reporter assay/qRT-PCR/Western blot                          | Functional MTI            | 19390056          |
| MIRT000597    | hsa-miR-20a-5p | CDKN1A      | 1026                            | qRT-PCR/Luciferase reporter assay/Western blot                          | Functional MTI            | 20190813          |
| MIRT001785    | hsa-miR-20a-5p | TGFBR2      | 7048                            | Immunoblot/Luciferase reporter assay/Microarray/qRT-PCR/Western blot    | Functional MTI            | 20940405          |
| MIRT003010    | hsa-miR-20a-5p | MAP3K12     | 7786                            | Luciferase reporter assay                                               | Functional MTI            | 19666108          |
| MIRT003011    | hsa-miR-20a-5p | BCL2        | 596                             | Luciferase reporter assay                                               | Functional MTI            | 19666108          |
| MIRT003012    | hsa-miR-20a-5p | MEF2D       | 4209                            | Luciferase reporter assay                                               | Functional MTI            | 19666108          |
| MIRT003369    | hsa-miR-20a-5p | PTEN        | 5728                            | Luciferase reporter assay/qRT-PCR/Western blot                          | Non-Functional MTI        | 20008935          |
| MIRT003382    | hsa-miR-20a-5p | APP         | 351                             | Luciferase reporter assay/Western blot                                  | Functional MTI            | 19110058          |
| MIRT003742    | hsa-miR-20a-5p | RUNX1       | 861                             | Luciferase reporter assay/qRT-PCR/Western blot                          | Functional MTI            | 17589498          |
| MIRT003903    | hsa-miR-20a-5p | NRAS        | 4893                            | Western blot                                                            | Non-Functional MTI        | 19110058          |
| MIRT004450    | hsa-miR-20a-5p | VEGFA       | 7422                            | ELISA/Luciferase reporter assay                                         | Functional MTI            | 18320040          |
| MIRT004570    | hsa-miR-20a-5p | BCL2L1      | 10018                           | PAR-CLIP                                                                | Functional MTI (Weak)     | 23592263          |
| MIRT004711    | hsa-miR-20a-5p | MUC17       | 140453                          | Immunohistochemistry/Microarray/qRT-PCR                                 | Functional MTI (Weak)     | 20926598          |
| MIRT005289    | hsa-miR-20a-5p | MYC         | 4609                            | Western blot                                                            | Functional MTI            | 18695042          |
| MIRT005481    | hsa-miR-20a-5p | BNIP2       | 663                             | qRT-PCR/Western blot                                                    | Functional MTI            | 21242194          |
| MIRT005627    | hsa-miR-20a-5p | THBS1       | 7057                            | Microarray/qRT-PCR                                                      | Non-Functional MTI (Weak) | 20940405          |
| MIRT005631    | hsa-miR-20a-5p | SMAD4       | 4089                            | Microarray                                                              | Non-Functional MTI (Weak) | 20940405          |
| MIRT005854    | hsa-miR-20a-5p | CCND2       | 894                             | Luciferase reporter assay                                               | Functional MTI            | 21283765          |
| MIRT005855    | hsa-miR-20a-5p | E2F3        | 1871                            | Luciferase reporter assay                                               | Non-Functional MTI        | 21283765          |
| MIRT005856    | hsa-miR-20a-5p | MAPK9       | 5601                            | Luciferase reporter assay                                               | Non-Functional MTI        | 21283765          |
| MIRT005857    | hsa-miR-20a-5p | RB1         | 5925                            | Luciferase reporter assay                                               | Functional MTI            | 21283765          |
| MIRT005858    | hsa-miR-20a-5p | RBL1        | 5933                            | Luciferase reporter assay                                               | Functional MTI            | 21283765          |
| MIRT005859    | hsa-miR-20a-5p | RBL2        | 5934                            | Luciferase reporter assay                                               | Functional MTI            | 21283765          |
| MIRT005860    | hsa-miR-20a-5p | WEE1        | 7465                            | Luciferase reporter assay                                               | Functional MTI            | 21283765          |
| MIRT006178    | hsa-miR-20a-5p | IRF2        | 3660                            | Luciferase reporter assay/Microarray/Northern blot/qRT-PCR/Western blot | Functional MTI            | 21880628          |
| MIRT006180    | hsa-miR-20a-5p | KIT         | 3815                            | Luciferase reporter assay/Microarray/Northern blot/qRT-PCR/Western blot | Functional MTI            | 21880628          |
| MIRT006289    | hsa-miR-20a-5p | EGLN3       | 112399                          | Luciferase reporter assay/Western blot                                  | Functional MTI            | 22182733          |
| MIRT006754    | hsa-miR-20a-5p | PPARG       | 5468                            | Luciferase reporter assay                                               | Functional MTI            | 21743293          |
| MIRT006755    | hsa-miR-20a-5p | BAMBI       | 25805                           | Luciferase reporter assay                                               | Functional MTI            | 21743293          |
| MIRT006756    | hsa-miR-20a-5p | CRIM1       | 51232                           | Luciferase reporter assay                                               | Functional MTI            | 21743293          |
| MIRT006772    | hsa-miR-20a-5p | MAP2K3      | 5606                            | Luciferase reporter assay                                               | Functional MTI            | 22696064          |
| MIRT007002    | hsa-miR-20a-5p | PURA        | 5813                            | Luciferase reporter assay                                               | Functional MTI            | 22835829          |
| MIRT031081    | hsa-miR-20a-5p | JAK1        | 3716                            | HITS-CLIP                                                               | Functional MTI (Weak)     | 22473208          |
| MIRT031082    | hsa-miR-20a-5p | ARHGAP12    | 94134                           | Reporter assay                                                          | Functional MTI            | 21751348          |
| MIRT031083    | hsa-miR-20a-5p | TSG101      | 7251                            | Reporter assay                                                          | Functional MTI            | 21751348          |
| MIRT035531    | hsa-miR-20a-5p | SIRPA       | 140885                          | Luciferase reporter assay                                               | Functional MTI            | 23626609          |
| MIRT050476    | hsa-miR-20a-5p | PHF8        | 23133                           | CLASH                                                                   | Functional MTI (Weak)     | 23622248          |
| MIRT050477    | hsa-miR-20a-5p | GPATCH11    | 253635                          | CLASH                                                                   | Functional MTI (Weak)     | 23622248          |
| MIRT050478    | hsa-miR-20a-5p | RPRD1A      | 55197                           | CLASH                                                                   | Functional MTI (Weak)     | 23622248          |
| MIRT050479    | hsa-miR-20a-5p | ATP8B2      | 57198                           | CLASH                                                                   | Functional MTI (Weak)     | 23622248          |
| MIRT050480    | hsa-miR-20a-5p | PSMD2       | 5708                            | CLASH                                                                   | Functional MTI (Weak)     | 23622248          |
| MIRT050481    | hsa-miR-20a-5p | INSIG1      | 3638                            | CLASH                                                                   | Functional MTI (Weak)     | 23622248          |
| MIRT050482    | hsa-miR-20a-5p | RTN2        | 6253                            | CLASH                                                                   | Functional MTI (Weak)     | 23622248          |
| MIRT050483    | hsa-miR-20a-5p | TCEA1       | 6917                            | CLASH                                                                   | Functional MTI (Weak)     | 23622248          |
| MIRT050484    | hsa-miR-20a-5p | PLEKHM3     | 389072                          | CLASH                                                                   | Functional MTI (Weak)     | 23622248          |
| MIRT050485    | hsa-miR-20a-5p | RPS10       | 6204                            | CLASH                                                                   | Functional MTI (Weak)     | 23622248          |
| MIRT050486    | hsa-miR-20a-5p | ALDH18A1    | 5832                            | CLASH                                                                   | Functional MTI (Weak)     | 23622248          |
| MIRT050487    | hsa-miR-20a-5p | UEVLD       | 55293                           | CLASH                                                                   | Functional MTI (Weak)     | 23622248          |
| MIRT050488    | hsa-miR-20a-5p | FGF7        | 2252                            | CLASH                                                                   | Functional MTI (Weak)     | 23622248          |
| MIRT050489    | hsa-miR-20a-5p | SSRP1       | 6749                            | CLASH                                                                   | Functional MTI (Weak)     | 23622248          |
| MIRT050490    | hsa-miR-20a-5p | COX5A       | 9377                            | CLASH                                                                   | Functional MTI (Weak)     | 23622248          |
| MIRT050491    | hsa-miR-20a-5p | AGO1        | 26523                           | CLASH                                                                   | Functional MTI (Weak)     | 23622248          |
| MIRT050492    | hsa-miR-20a-5p | KIAA0100    | 9703                            | CLASH                                                                   | Functional MTI (Weak)     | 23622248          |
| MIRT050493    | hsa-miR-20a-5p | FHL3        | 2275                            | CLASH                                                                   | Functional MTI (Weak)     | 23622248          |
| MIRT050494    | hsa-miR-20a-5p | GD12        | 2665                            | CLASH                                                                   | Functional MTI (Weak)     | 23622248          |
| MIRT050495    | hsa-miR-20a-5p | INTS3       | 65123                           | CLASH                                                                   | Functional MTI (Weak)     | 23622248          |
| MIRT050496    | hsa-miR-20a-5p | HMG20A      | 10363                           | CLASH                                                                   | Functional MTI (Weak)     | 23622248          |
| MIRT050497    | hsa-miR-20a-5p | NAXE        | 128240                          | CLASH                                                                   | Functional MTI (Weak)     | 23622248          |
| MIRT050498    | hsa-miR-20a-5p | PRKD3       | 23683                           | CLASH                                                                   | Functional MTI (Weak)     | 23622248          |
| MIRT050499    | hsa-miR-20a-5p | AP3S2       | 10239                           | CLASH                                                                   | Functional MTI (Weak)     | 23622248          |
| MIRT050500    | hsa-miR-20a-5p | PCNX4       | 64430                           | CLASH                                                                   | Functional MTI (Weak)     | 23622248          |
| MIRT050501    | hsa-miR-20a-5p | IKZF5       | 64376                           | CLASH                                                                   | Functional MTI (Weak)     | 23622248          |
| MIRT050502    | hsa-miR-20a-5p | TMEM97      | 27346                           | CLASH                                                                   | Functional MTI (Weak)     | 23622248          |
| MIRT050503    | hsa-miR-20a-5p | ATP6        | 4508                            | CLASH                                                                   | Functional MTI (Weak)     | 23622248          |
| MIRT050504    | hsa-miR-20a-5p | RPA2        | 6118                            | CLASH                                                                   | Functional MTI (Weak)     | 23622248          |
| MIRT050505    | hsa-miR-20a-5p | PHYH        | 5264                            | CLASH                                                                   | Functional MTI (Weak)     | 23622248          |
| MIRT050506    | hsa-miR-20a-5p | KIF2C       | 11004                           | CLASH                                                                   | Functional MTI (Weak)     | 23622248          |
| MIRT050507    | hsa-miR-20a-5p | DDX5        | 1655                            | CLASH                                                                   | Functional MTI (Weak)     | 23622248          |
| MIRT050508    | hsa-miR-20a-5p | DTX2        | 113878                          | CLASH                                                                   | Functional MTI (Weak)     | 23622248          |
| MIRT050509    | hsa-miR-20a-5p | MPHOSPH8    | 54737                           | CLASH                                                                   | Functional MTI (Weak)     | 23622248          |
| MIRT050510    | hsa-miR-20a-5p | HAUS2       | 55142                           | CLASH                                                                   | Functional MTI (Weak)     | 23622248          |
| MIRT050511    | hsa-miR-20a-5p | ZNF331      | 55422                           | CLASH                                                                   | Functional MTI (Weak)     | 23622248          |
| MIRT050512    | hsa-miR-20a-5p | PPP6R3      | 55291                           | CLASH                                                                   | Functional MTI (Weak)     | 23622248          |
| MIRT050513    | hsa-miR-20a-5p | METTL22     | 79091                           | CLASH                                                                   | Functional MTI (Weak)     | 23622248          |
| MIRT050514    | hsa-miR-20a-5p | PPAN        | 56342                           | CLASH                                                                   | Functional MTI (Weak)     | 23622248          |
| MIRT050515    | hsa-miR-20a-5p | FBL         | 2091                            | CLASH                                                                   | Functional MTI (Weak)     | 23622248          |
| MIRT050516    | hsa-miR-20a-5p | RPL31       | 6160                            | CLASH                                                                   | Functional MTI (Weak)     | 23622248          |
| MIRT050517    | hsa-miR-20a-5p | SEPT2       | 4735                            | CLASH                                                                   | Functional MTI (Weak)     | 23622248          |
| MIRT050518    | hsa-miR-20a-5p | TOMM20      | 9804                            | CLASH                                                                   | Functional MTI (Weak)     | 23622248          |
| MIRT050519    | hsa-miR-20a-5p | NCOR2       | 9612                            | CLASH                                                                   | Functional MTI (Weak)     | 23622248          |
| MIRT050520    | hsa-miR-20a-5p | PSD3        | 23362                           | CLASH                                                                   | Functional MTI (Weak)     | 23622248          |
| MIRT050521    | hsa-miR-20a-5p | AP3D1       | 8943                            | CLASH                                                                   | Functional MTI (Weak)     | 23622248          |
| MIRT050522    | hsa-miR-20a-5p | TBC1D15     | 64786                           | CLASH                                                                   | Functional MTI (Weak)     | 23622248          |
| MIRT050523    | hsa-miR-20a-5p | DPY19L4     | 286148                          | CLASH                                                                   | Functional MTI (Weak)     | 23622248          |
| MIRT050524    | hsa-miR-20a-5p | PTPN23      | 25930                           | CLASH                                                                   | Functional MTI (Weak)     | 23622248          |
| MIRT050525    | hsa-miR-20a-5p | C11orf68    | 83638                           | CLASH                                                                   | Functional MTI (Weak)     | 23622248          |
| MIRT050526    | hsa-miR-20a-5p | CTR9        | 9646                            | CLASH                                                                   | Functional MTI (Weak)     | 23622248          |
| MIRT050527    | hsa-miR-20a-5p | PAIP1       | 10605                           | CLASH                                                                   | Functional MTI (Weak)     | 23622248          |
| MIRT050528    | hsa-miR-20a-5p | L2HGDH      | 79944                           | CLASH                                                                   | Functional MTI (Weak)     | 23622248          |
| MIRT050529    | hsa-miR-20a-5p | CDT1        | 81620                           | CLASH                                                                   | Functional MTI (Weak)     | 23622248          |
| MIRT050530    | hsa-miR-20a-5p | RPL30       | 6156                            | CLASH                                                                   | Functional MTI (Weak)     | 23622248          |
| MIRT050531    | hsa-miR-20a-5p | MRS2        | 57380                           | CLASH                                                                   | Functional MTI (Weak)     | 23622248          |
| MIRT050532    | hsa-miR-20a-5p | TMX4        | 56255                           | CLASH                                                                   | Functional MTI (Weak)     | 23622248          |
| MIRT050533    | hsa-miR-20a-5p | LAMTOR1     | 55004                           | CLASH                                                                   | Functional MTI (Weak)     | 23622248          |
| MIRT050534    | hsa-miR-20a-5p | ADGRL3      | 23284                           | CLASH                                                                   | Functional MTI (Weak)     | 23622248          |
| MIRT050535    | hsa-miR-20a-5p | RBM10       | 8241                            | CLASH                                                                   | Functional MTI (Weak)     | 23622248          |
| MIRT050536    | hsa-miR-20a-5p | ADGRE2      | 30817                           | CLASH                                                                   | Functional MTI (Weak)     | 23622248          |
| MIRT050537    | hsa-miR-20a-5p | FBXO3       | 26273                           | CLASH                                                                   | Functional MTI (Weak)     | 23622248          |
| MIRT050538    | hsa-miR-20a-5p | MLXIP       | 22877                           | CLASH                                                                   | Functional MTI (Weak)     | 23622248          |

|            |                |          |        |                                                                        |                       |          |
|------------|----------------|----------|--------|------------------------------------------------------------------------|-----------------------|----------|
| MIRT050539 | hsa-miR-20a-5p | RNGTT    | 8732   | CLASH                                                                  | Functional MTI (Weak) | 23622248 |
| MIRT050540 | hsa-miR-20a-5p | MAD1L1   | 8379   | CLASH                                                                  | Functional MTI (Weak) | 23622248 |
| MIRT050541 | hsa-miR-20a-5p | DLC1     | 10395  | CLASH                                                                  | Functional MTI (Weak) | 23622248 |
| MIRT050542 | hsa-miR-20a-5p | NUP214   | 8021   | CLASH                                                                  | Functional MTI (Weak) | 23622248 |
| MIRT050543 | hsa-miR-20a-5p | PAQR5    | 54852  | CLASH                                                                  | Functional MTI (Weak) | 23622248 |
| MIRT050544 | hsa-miR-20a-5p | BTBD2    | 55643  | CLASH                                                                  | Functional MTI (Weak) | 23622248 |
| MIRT050545 | hsa-miR-20a-5p | XYLT2    | 64132  | CLASH                                                                  | Functional MTI (Weak) | 23622248 |
| MIRT050546 | hsa-miR-20a-5p | ZNF398   | 57541  | CLASH                                                                  | Functional MTI (Weak) | 23622248 |
| MIRT050547 | hsa-miR-20a-5p | CEP120   | 153241 | CLASH                                                                  | Functional MTI (Weak) | 23622248 |
| MIRT050548 | hsa-miR-20a-5p | IL17RC   | 84818  | CLASH                                                                  | Functional MTI (Weak) | 23622248 |
| MIRT050549 | hsa-miR-20a-5p | UBE2C    | 11065  | CLASH                                                                  | Functional MTI (Weak) | 23622248 |
| MIRT050550 | hsa-miR-20a-5p | PGK1     | 5230   | CLASH                                                                  | Functional MTI (Weak) | 23622248 |
| MIRT050551 | hsa-miR-20a-5p | ORMDL3   | 94103  | CLASH                                                                  | Functional MTI (Weak) | 23622248 |
| MIRT050552 | hsa-miR-20a-5p | TUBB     | 203068 | CLASH                                                                  | Functional MTI (Weak) | 23622248 |
| MIRT050553 | hsa-miR-20a-5p | TDRD3    | 81550  | CLASH                                                                  | Functional MTI (Weak) | 23622248 |
| MIRT050554 | hsa-miR-20a-5p | DLG5     | 9231   | CLASH                                                                  | Functional MTI (Weak) | 23622248 |
| MIRT050555 | hsa-miR-20a-5p | VEZF1    | 7716   | CLASH                                                                  | Functional MTI (Weak) | 23622248 |
| MIRT050556 | hsa-miR-20a-5p | CCDC88C  | 440193 | CLASH                                                                  | Functional MTI (Weak) | 23622248 |
| MIRT050557 | hsa-miR-20a-5p | USP10    | 9100   | CLASH                                                                  | Functional MTI (Weak) | 23622248 |
| MIRT050558 | hsa-miR-20a-5p | KIAA1191 | 57179  | CLASH                                                                  | Functional MTI (Weak) | 23622248 |
| MIRT050559 | hsa-miR-20a-5p | STAT3    | 6774   | CLASH                                                                  | Functional MTI (Weak) | 23622248 |
| MIRT050560 | hsa-miR-20a-5p | GATA6    | 2627   | CLASH                                                                  | Functional MTI (Weak) | 23622248 |
| MIRT050561 | hsa-miR-20a-5p | RPL18A   | 6142   | CLASH                                                                  | Functional MTI (Weak) | 23622248 |
| MIRT050562 | hsa-miR-20a-5p | SARAF    | 51669  | CLASH                                                                  | Functional MTI (Weak) | 23622248 |
| MIRT050563 | hsa-miR-20a-5p | ARL9     | 132946 | CLASH                                                                  | Functional MTI (Weak) | 23622248 |
| MIRT050564 | hsa-miR-20a-5p | CTSA     | 5476   | CLASH                                                                  | Functional MTI (Weak) | 23622248 |
| MIRT050565 | hsa-miR-20a-5p | ABCA3    | 21     | CLASH                                                                  | Functional MTI (Weak) | 23622248 |
| MIRT050566 | hsa-miR-20a-5p | MRPL13   | 28998  | CLASH                                                                  | Functional MTI (Weak) | 23622248 |
| MIRT050567 | hsa-miR-20a-5p | MAN1C1   | 57134  | CLASH                                                                  | Functional MTI (Weak) | 23622248 |
| MIRT050568 | hsa-miR-20a-5p | AGO4     | 192670 | CLASH                                                                  | Functional MTI (Weak) | 23622248 |
| MIRT050569 | hsa-miR-20a-5p | BACH1    | 571    | CLASH                                                                  | Functional MTI (Weak) | 23622248 |
| MIRT050570 | hsa-miR-20a-5p | RFC3     | 5983   | CLASH                                                                  | Functional MTI (Weak) | 23622248 |
| MIRT050571 | hsa-miR-20a-5p | ARHGEF7  | 8874   | CLASH                                                                  | Functional MTI (Weak) | 23622248 |
| MIRT050572 | hsa-miR-20a-5p | GNP2     | 54707  | CLASH                                                                  | Functional MTI (Weak) | 23622248 |
| MIRT050573 | hsa-miR-20a-5p | LDHB     | 3945   | CLASH                                                                  | Functional MTI (Weak) | 23622248 |
| MIRT050574 | hsa-miR-20a-5p | PTPRS    | 5802   | CLASH                                                                  | Functional MTI (Weak) | 23622248 |
| MIRT050575 | hsa-miR-20a-5p | PPP2R1A  | 5518   | CLASH                                                                  | Functional MTI (Weak) | 23622248 |
| MIRT050576 | hsa-miR-20a-5p | CDK16    | 5127   | CLASH                                                                  | Functional MTI (Weak) | 23622248 |
| MIRT050577 | hsa-miR-20a-5p | WBP4     | 11193  | CLASH                                                                  | Functional MTI (Weak) | 23622248 |
| MIRT050578 | hsa-miR-20a-5p | CCNB1    | 891    | CLASH                                                                  | Functional MTI (Weak) | 23622248 |
| MIRT050579 | hsa-miR-20a-5p | POGZ     | 23126  | CLASH                                                                  | Functional MTI (Weak) | 23622248 |
| MIRT050580 | hsa-miR-20a-5p | KLHL15   | 80311  | CLASH                                                                  | Functional MTI (Weak) | 23622248 |
| MIRT050581 | hsa-miR-20a-5p | RTFDC1   | 51507  | CLASH                                                                  | Functional MTI (Weak) | 23622248 |
| MIRT050582 | hsa-miR-20a-5p | FLNA     | 2316   | CLASH                                                                  | Functional MTI (Weak) | 23622248 |
| MIRT050583 | hsa-miR-20a-5p | PLXNA1   | 5361   | CLASH                                                                  | Functional MTI (Weak) | 23622248 |
| MIRT050584 | hsa-miR-20a-5p | ADSS     | 159    | CLASH                                                                  | Functional MTI (Weak) | 23622248 |
| MIRT050585 | hsa-miR-20a-5p | MANEAL   | 149175 | CLASH                                                                  | Functional MTI (Weak) | 23622248 |
| MIRT050586 | hsa-miR-20a-5p | NUP188   | 23511  | CLASH                                                                  | Functional MTI (Weak) | 23622248 |
| MIRT050587 | hsa-miR-20a-5p | EC11     | 1632   | CLASH                                                                  | Functional MTI (Weak) | 23622248 |
| MIRT050588 | hsa-miR-20a-5p | NCOA3    | 8202   | CLASH                                                                  | Functional MTI (Weak) | 23622248 |
| MIRT050589 | hsa-miR-20a-5p | MORF4L2  | 9643   | CLASH                                                                  | Functional MTI (Weak) | 23622248 |
| MIRT050590 | hsa-miR-20a-5p | ATL3     | 25923  | CLASH                                                                  | Functional MTI (Weak) | 23622248 |
| MIRT050591 | hsa-miR-20a-5p | FOXJ3    | 22887  | CLASH                                                                  | Functional MTI (Weak) | 23622248 |
| MIRT050592 | hsa-miR-20a-5p | PRRC2C   | 23215  | CLASH                                                                  | Functional MTI (Weak) | 23622248 |
| MIRT050593 | hsa-miR-20a-5p | RPL21    | 6144   | CLASH                                                                  | Functional MTI (Weak) | 23622248 |
| MIRT050594 | hsa-miR-20a-5p | SELENBP1 | 8991   | CLASH                                                                  | Functional MTI (Weak) | 23622248 |
| MIRT050595 | hsa-miR-20a-5p | YBX1     | 4904   | CLASH                                                                  | Functional MTI (Weak) | 23622248 |
| MIRT050596 | hsa-miR-20a-5p | B4GALT2  | 8704   | CLASH                                                                  | Functional MTI (Weak) | 23622248 |
| MIRT050597 | hsa-miR-20a-5p | PYGB     | 5834   | CLASH                                                                  | Functional MTI (Weak) | 23622248 |
| MIRT050598 | hsa-miR-20a-5p | AKR7A2   | 8574   | CLASH                                                                  | Functional MTI (Weak) | 23622248 |
| MIRT050599 | hsa-miR-20a-5p | C9orf78  | 51759  | CLASH                                                                  | Functional MTI (Weak) | 23622248 |
| MIRT050600 | hsa-miR-20a-5p | STIL     | 6491   | CLASH                                                                  | Functional MTI (Weak) | 23622248 |
| MIRT050601 | hsa-miR-20a-5p | CDK19    | 23097  | CLASH                                                                  | Functional MTI (Weak) | 23622248 |
| MIRT050602 | hsa-miR-20a-5p | KDM4D    | 55693  | CLASH                                                                  | Functional MTI (Weak) | 23622248 |
| MIRT050603 | hsa-miR-20a-5p | UQCRC1   | 7384   | CLASH                                                                  | Functional MTI (Weak) | 23622248 |
| MIRT050604 | hsa-miR-20a-5p | RUFY2    | 55680  | CLASH                                                                  | Functional MTI (Weak) | 23622248 |
| MIRT050605 | hsa-miR-20a-5p | RPS27    | 6232   | CLASH                                                                  | Functional MTI (Weak) | 23622248 |
| MIRT050606 | hsa-miR-20a-5p | BTN3A1   | 11119  | CLASH                                                                  | Functional MTI (Weak) | 23622248 |
| MIRT050607 | hsa-miR-20a-5p | PBX1P1   | 57326  | CLASH                                                                  | Functional MTI (Weak) | 23622248 |
| MIRT050608 | hsa-miR-20a-5p | ARFGEF2  | 10564  | CLASH                                                                  | Functional MTI (Weak) | 23622248 |
| MIRT050609 | hsa-miR-20a-5p | NUDT21   | 11051  | CLASH                                                                  | Functional MTI (Weak) | 23622248 |
| MIRT050610 | hsa-miR-20a-5p | NETO2    | 81831  | CLASH                                                                  | Functional MTI (Weak) | 23622248 |
| MIRT050611 | hsa-miR-20a-5p | SLC25A28 | 81894  | CLASH                                                                  | Functional MTI (Weak) | 23622248 |
| MIRT050612 | hsa-miR-20a-5p | NAP1L1   | 4673   | CLASH                                                                  | Functional MTI (Weak) | 23622248 |
| MIRT050613 | hsa-miR-20a-5p | PHC1     | 1911   | CLASH                                                                  | Functional MTI (Weak) | 23622248 |
| MIRT050614 | hsa-miR-20a-5p | ZNF706   | 51123  | CLASH                                                                  | Functional MTI (Weak) | 23622248 |
| MIRT050615 | hsa-miR-20a-5p | CCDC47   | 57003  | CLASH                                                                  | Functional MTI (Weak) | 23622248 |
| MIRT050616 | hsa-miR-20a-5p | ARPC2    | 10109  | CLASH                                                                  | Functional MTI (Weak) | 23622248 |
| MIRT050617 | hsa-miR-20a-5p | EIF4G2   | 1982   | CLASH                                                                  | Functional MTI (Weak) | 23622248 |
| MIRT050618 | hsa-miR-20a-5p | MAGOHB   | 55110  | CLASH                                                                  | Functional MTI (Weak) | 23622248 |
| MIRT050619 | hsa-miR-20a-5p | ZNF598   | 90850  | CLASH                                                                  | Functional MTI (Weak) | 23622248 |
| MIRT050620 | hsa-miR-20a-5p | P3H4     | 10609  | CLASH                                                                  | Functional MTI (Weak) | 23622248 |
| MIRT050621 | hsa-miR-20a-5p | CERS2    | 29956  | CLASH                                                                  | Functional MTI (Weak) | 23622248 |
| MIRT050622 | hsa-miR-20a-5p | LYPD6    | 130574 | CLASH                                                                  | Functional MTI (Weak) | 23622248 |
| MIRT050623 | hsa-miR-20a-5p | HEXIM1   | 10614  | CLASH                                                                  | Functional MTI (Weak) | 23622248 |
| MIRT050624 | hsa-miR-20a-5p | WAC      | 51322  | CLASH                                                                  | Functional MTI (Weak) | 23622248 |
| MIRT050625 | hsa-miR-20a-5p | ZNF1     | 57169  | CLASH                                                                  | Functional MTI (Weak) | 23622248 |
| MIRT050626 | hsa-miR-20a-5p | RBM12B   | 389677 | CLASH                                                                  | Functional MTI (Weak) | 23622248 |
| MIRT052914 | hsa-miR-20a-5p | LIMK1    | 3984   | Luciferase reporter assay//Microarray//qRT-PCR//Western blot           | Functional MTI        | 24858712 |
| MIRT052971 | hsa-miR-20a-5p | PHLPP2   | 23035  | Immunoblot/Luciferase reporter assay                                   | Functional MTI        | 22116552 |
| MIRT053007 | hsa-miR-20a-5p | GJA1     | 2697   | Luciferase reporter assay//qRT-PCR//Western blot                       | Functional MTI        | 22785209 |
| MIRT053023 | hsa-miR-20a-5p | DUSP2    | 1844   | qRT-PCR//Western blot//Reporter assay                                  | Functional MTI        | 22648654 |
| MIRT053109 | hsa-miR-20a-5p | ITGB8    | 3696   | Luciferase reporter assay//qRT-PCR                                     | Functional MTI        | 23602254 |
| MIRT053159 | hsa-miR-20a-5p | SMAD7    | 4092   | Luciferase reporter assay//qRT-PCR//Western blot                       | Functional MTI        | 23665284 |
| MIRT053208 | hsa-miR-20a-5p | MAP3K5   | 4217   | Luciferase reporter assay//qRT-PCR//Western blot                       | Functional MTI        | 23087182 |
| MIRT053332 | hsa-miR-20a-5p | MCL1     | 4170   | Immunohistochemistry//Luciferase reporter assay//qRT-PCR//Western blot | Functional MTI        | 23594563 |
| MIRT053505 | hsa-miR-20a-5p | TP53NP1  | 94241  | Luciferase reporter assay//qRT-PCR//Western blot                       | Functional MTI        | 23333058 |
| MIRT053563 | hsa-miR-20a-5p | EGR2     | 1959   | Flow//Luciferase reporter assay//qRT-PCR//Western blot                 | Functional MTI        | 23924943 |
| MIRT054860 | hsa-miR-20a-5p | ABL2     | 27     | Luciferase reporter assay//qRT-PCR//Western blot                       | Functional MTI        | 24464651 |
| MIRT055020 | hsa-miR-20a-5p | TPRG1L   | 127262 | HITS-CLIP                                                              | Functional MTI (Weak) | 22473208 |
| MIRT055382 | hsa-miR-20a-5p | SHOC2    | 8036   | PAR-CLIP                                                               | Functional MTI (Weak) | 23592263 |
| MIRT055649 | hsa-miR-20a-5p | WDR37    | 22884  | HITS-CLIP                                                              | Functional MTI (Weak) | 22473208 |
| MIRT056476 | hsa-miR-20a-5p | PFKP     | 5214   | HITS-CLIP                                                              | Functional MTI (Weak) | 22473208 |
| MIRT056811 | hsa-miR-20a-5p | REEP3    | 221035 | HITS-CLIP                                                              | Functional MTI (Weak) | 22473208 |
| MIRT057384 | hsa-miR-20a-5p | TNKS2    | 80351  | HITS-CLIP                                                              | Functional MTI (Weak) | 22473208 |



|            |                |          |        |                     |                       |          |
|------------|----------------|----------|--------|---------------------|-----------------------|----------|
| MIRT057822 | hsa-miR-20a-5p | SLC30A7  | 148867 | PAR-CLIP            | Functional MTI (Weak) | 23592263 |
| MIRT058912 | hsa-miR-20a-5p | FAM46C   | 54855  | HITS-CLIP           | Functional MTI (Weak) | 22473208 |
| MIRT059186 | hsa-miR-20a-5p | CRY2     | 1408   | HITS-CLIP           | Functional MTI (Weak) | 22473208 |
| MIRT060075 | hsa-miR-20a-5p | TMEM138  | 51524  | HITS-CLIP           | Functional MTI (Weak) | 22473208 |
| MIRT060678 | hsa-miR-20a-5p | KLHL20   | 27252  | HITS-CLIP           | Functional MTI (Weak) | 22473208 |
| MIRT061181 | hsa-miR-20a-5p | MED17    | 9440   | HITS-CLIP           | Functional MTI (Weak) | 22473208 |
| MIRT061789 | hsa-miR-20a-5p | PPP1R15B | 84919  | PAR-CLIP            | Functional MTI (Weak) | 24398324 |
| MIRT063054 | hsa-miR-20a-5p | ULK1     | 8408   | PAR-CLIP//HITS-CLIP | Functional MTI (Weak) | 21572407 |
| MIRT063434 | hsa-miR-20a-5p | SKI      | 6497   | HITS-CLIP           | Functional MTI (Weak) | 22473208 |
| MIRT064435 | hsa-miR-20a-5p | GPR137B  | 7107   | PAR-CLIP            | Functional MTI (Weak) | 20371350 |
| MIRT064797 | hsa-miR-20a-5p | ZBTB18   | 10472  | HITS-CLIP           | Functional MTI (Weak) | 22473208 |
| MIRT065364 | hsa-miR-20a-5p | TMBIM6   | 7009   | HITS-CLIP           | Functional MTI (Weak) | 22473208 |
| MIRT065670 | hsa-miR-20a-5p | ACVR1B   | 91     | PAR-CLIP            | Functional MTI (Weak) | 23446348 |
| MIRT065858 | hsa-miR-20a-5p | GDF11    | 10220  | PAR-CLIP            | Functional MTI (Weak) | 21572407 |
| MIRT065886 | hsa-miR-20a-5p | RAB5B    | 5869   | HITS-CLIP           | Functional MTI (Weak) | 22473208 |
| MIRT067229 | hsa-miR-20a-5p | FOXJ2    | 55810  | PAR-CLIP            | Functional MTI (Weak) | 21572407 |
| MIRT068492 | hsa-miR-20a-5p | NHLRC3   | 387921 | HITS-CLIP           | Functional MTI (Weak) | 22473208 |
| MIRT070839 | hsa-miR-20a-5p | EIF2S1   | 1965   | PAR-CLIP            | Functional MTI (Weak) | 21572407 |
| MIRT070995 | hsa-miR-20a-5p | SMOC1    | 64093  | PAR-CLIP            | Functional MTI (Weak) | 21572407 |
| MIRT071324 | hsa-miR-20a-5p | CMPK1    | 51727  | HITS-CLIP           | Functional MTI (Weak) | 22473208 |
| MIRT071903 | hsa-miR-20a-5p | ZFYVE9   | 9372   | PAR-CLIP            | Functional MTI (Weak) | 23592263 |
| MIRT072247 | hsa-miR-20a-5p | B2M      | 567    | PAR-CLIP            | Functional MTI (Weak) | 23592263 |
| MIRT072567 | hsa-miR-20a-5p | USP3     | 9960   | HITS-CLIP           | Functional MTI (Weak) | 22473208 |
| MIRT073117 | hsa-miR-20a-5p | UBE2Q2   | 92912  | HITS-CLIP           | Functional MTI (Weak) | 22473208 |
| MIRT073374 | hsa-miR-20a-5p | ABHD2    | 11057  | HITS-CLIP           | Functional MTI (Weak) | 22473208 |
| MIRT073407 | hsa-miR-20a-5p | SEMA4B   | 10509  | HITS-CLIP           | Functional MTI (Weak) | 22473208 |
| MIRT074789 | hsa-miR-20a-5p | CYLD     | 1540   | HITS-CLIP           | Functional MTI (Weak) | 22473208 |
| MIRT074891 | hsa-miR-20a-5p | CHD9     | 80205  | HITS-CLIP           | Functional MTI (Weak) | 22473208 |
| MIRT075775 | hsa-miR-20a-5p | KIAA0513 | 9764   | PAR-CLIP            | Functional MTI (Weak) | 23592263 |
| MIRT076177 | hsa-miR-20a-5p | GID4     | 79018  | HITS-CLIP           | Functional MTI (Weak) | 22473208 |
| MIRT077064 | hsa-miR-20a-5p | KRT10    | 3858   | PAR-CLIP            | Functional MTI (Weak) | 23592263 |
| MIRT077831 | hsa-miR-20a-5p | MINK1    | 50488  | HITS-CLIP           | Functional MTI (Weak) | 22473208 |
| MIRT078811 | hsa-miR-20a-5p | UNK      | 85451  | PAR-CLIP            | Functional MTI (Weak) | 22012620 |
| MIRT079344 | hsa-miR-20a-5p | CCDC137  | 339230 | HITS-CLIP           | Functional MTI (Weak) | 22473208 |
| MIRT079411 | hsa-miR-20a-5p | FOXK2    | 3607   | HITS-CLIP           | Functional MTI (Weak) | 22473208 |
| MIRT079772 | hsa-miR-20a-5p | CABLES1  | 91768  | PAR-CLIP            | Functional MTI (Weak) | 23592263 |
| MIRT080178 | hsa-miR-20a-5p | PRKACB   | 5567   | PAR-CLIP            | Functional MTI (Weak) | 21572407 |
| MIRT080848 | hsa-miR-20a-5p | RAB12    | 201475 | HITS-CLIP           | Functional MTI (Weak) | 22473208 |
| MIRT081117 | hsa-miR-20a-5p | LDLR     | 3949   | HITS-CLIP           | Functional MTI (Weak) | 22473208 |
| MIRT081198 | hsa-miR-20a-5p | MIDN     | 90007  | HITS-CLIP           | Functional MTI (Weak) | 22473208 |
| MIRT081981 | hsa-miR-20a-5p | GRAMD1A  | 57655  | HITS-CLIP           | Functional MTI (Weak) | 22473208 |
| MIRT082290 | hsa-miR-20a-5p | FNBP1L   | 54874  | PAR-CLIP            | Functional MTI (Weak) | 23446348 |
| MIRT083739 | hsa-miR-20a-5p | PARD6B   | 84612  | HITS-CLIP           | Functional MTI (Weak) | 22473208 |
| MIRT083960 | hsa-miR-20a-5p | RAB22A   | 57403  | HITS-CLIP           | Functional MTI (Weak) | 22473208 |
| MIRT084344 | hsa-miR-20a-5p | RRM2     | 6241   | HITS-CLIP           | Functional MTI (Weak) | 22473208 |
| MIRT085173 | hsa-miR-20a-5p | SLC5A3   | 6526   | PAR-CLIP            | Functional MTI (Weak) | 21572407 |
| MIRT085375 | hsa-miR-20a-5p | SPOPL    | 339745 | HITS-CLIP           | Functional MTI (Weak) | 22473208 |
| MIRT085867 | hsa-miR-20a-5p | TANC1    | 85461  | HITS-CLIP           | Functional MTI (Weak) | 22473208 |
| MIRT086425 | hsa-miR-20a-5p | NABP1    | 64859  | HITS-CLIP           | Functional MTI (Weak) | 22473208 |
| MIRT087604 | hsa-miR-20a-5p | ATG16L1  | 55054  | HITS-CLIP           | Functional MTI (Weak) | 22473208 |
| MIRT088033 | hsa-miR-20a-5p | UBXN2A   | 165324 | PAR-CLIP            | Functional MTI (Weak) | 21572407 |
| MIRT088337 | hsa-miR-20a-5p | MAPRE3   | 22924  | PAR-CLIP            | Functional MTI (Weak) | 24398324 |
| MIRT090633 | hsa-miR-20a-5p | U2SURP   | 23350  | HITS-CLIP           | Functional MTI (Weak) | 22473208 |
| MIRT092685 | hsa-miR-20a-5p | C3orf38  | 285237 | PAR-CLIP            | Functional MTI (Weak) | 24398324 |
| MIRT093800 | hsa-miR-20a-5p | KLF3     | 51274  | PAR-CLIP            | Functional MTI (Weak) | 22012620 |
| MIRT093941 | hsa-miR-20a-5p | SLAIN2   | 57606  | HITS-CLIP           | Functional MTI (Weak) | 22473208 |
| MIRT095200 | hsa-miR-20a-5p | SMAD5    | 4090   | HITS-CLIP           | Functional MTI (Weak) | 22473208 |
| MIRT095719 | hsa-miR-20a-5p | ANKH     | 56172  | PAR-CLIP            | Functional MTI (Weak) | 23592263 |
| MIRT095997 | hsa-miR-20a-5p | ATP6V0E1 | 8992   | HITS-CLIP           | Functional MTI (Weak) | 22473208 |
| MIRT096308 | hsa-miR-20a-5p | SQSTM1   | 8878   | HITS-CLIP           | Functional MTI (Weak) | 22473208 |
| MIRT097128 | hsa-miR-20a-5p | FCHO2    | 115548 | HITS-CLIP           | Functional MTI (Weak) | 22473208 |
| MIRT097603 | hsa-miR-20a-5p | POLR3G   | 10622  | HITS-CLIP           | Functional MTI (Weak) | 22473208 |
| MIRT097649 | hsa-miR-20a-5p | LYSMD3   | 116068 | HITS-CLIP           | Functional MTI (Weak) | 22473208 |
| MIRT099308 | hsa-miR-20a-5p | QKI      | 9444   | PAR-CLIP            | Functional MTI (Weak) | 23446348 |
| MIRT099355 | hsa-miR-20a-5p | C6orf120 | 387263 | HITS-CLIP           | Functional MTI (Weak) | 22473208 |
| MIRT099824 | hsa-miR-20a-5p | SOX4     | 6659   | PAR-CLIP            | Functional MTI (Weak) | 23592263 |
| MIRT100277 | hsa-miR-20a-5p | MICB     | 4277   | HITS-CLIP           | Functional MTI (Weak) | 22473208 |
| MIRT100454 | hsa-miR-20a-5p | ZBTB9    | 221504 | HITS-CLIP           | Functional MTI (Weak) | 22473208 |
| MIRT100945 | hsa-miR-20a-5p | CENPQ    | 55166  | PAR-CLIP            | Functional MTI (Weak) | 23446348 |
| MIRT102221 | hsa-miR-20a-5p | HBP1     | 26959  | HITS-CLIP           | Functional MTI (Weak) | 22473208 |
| MIRT102294 | hsa-miR-20a-5p | DNABP9   | 4189   | PAR-CLIP            | Functional MTI (Weak) | 24398324 |
| MIRT103189 | hsa-miR-20a-5p | SP4      | 6671   | PAR-CLIP            | Functional MTI (Weak) | 23446348 |
| MIRT104161 | hsa-miR-20a-5p | PHTF2    | 57157  | PAR-CLIP            | Functional MTI (Weak) | 23446348 |
| MIRT104394 | hsa-miR-20a-5p | ANKIB1   | 54467  | HITS-CLIP           | Functional MTI (Weak) | 22473208 |
| MIRT108651 | hsa-miR-20a-5p | ZBTB33   | 10009  | HITS-CLIP           | Functional MTI (Weak) | 22473208 |
| MIRT108719 | hsa-miR-20a-5p | XIAP     | 331    | PAR-CLIP            | Functional MTI (Weak) | 21572407 |
| MIRT110266 | hsa-miR-20a-5p | GBF1     | 8729   | HITS-CLIP           | Functional MTI (Weak) | 22473208 |
| MIRT112089 | hsa-miR-20a-5p | TIMM17A  | 10440  | PAR-CLIP            | Functional MTI (Weak) | 22012620 |
| MIRT115779 | hsa-miR-20a-5p | CAPN15   | 6650   | PAR-CLIP            | Functional MTI (Weak) | 23592263 |
| MIRT121800 | hsa-miR-20a-5p | GRPEL2   | 134266 | HITS-CLIP           | Functional MTI (Weak) | 22473208 |
| MIRT122363 | hsa-miR-20a-5p | RGMB     | 285704 | PAR-CLIP            | Functional MTI (Weak) | 21572407 |
| MIRT124125 | hsa-miR-20a-5p | GINS4    | 84296  | PAR-CLIP            | Functional MTI (Weak) | 23446348 |
| MIRT125725 | hsa-miR-20a-5p | TRIM8    | 81603  | HITS-CLIP           | Functional MTI (Weak) | 22473208 |
| MIRT126308 | hsa-miR-20a-5p | ACADSB   | 36     | HITS-CLIP           | Functional MTI (Weak) | 22473208 |
| MIRT126344 | hsa-miR-20a-5p | ZRANB1   | 54764  | HITS-CLIP           | Functional MTI (Weak) | 22473208 |
| MIRT126550 | hsa-miR-20a-5p | MASTL    | 84930  | HITS-CLIP           | Functional MTI (Weak) | 22473208 |
| MIRT127161 | hsa-miR-20a-5p | VPS26A   | 9559   | HITS-CLIP           | Functional MTI (Weak) | 22473208 |
| MIRT129131 | hsa-miR-20a-5p | ARCN1    | 372    | HITS-CLIP           | Functional MTI (Weak) | 22473208 |
| MIRT130070 | hsa-miR-20a-5p | TXNIP    | 10628  | HITS-CLIP           | Functional MTI (Weak) | 22473208 |
| MIRT132394 | hsa-miR-20a-5p | PPP1R12B | 4660   | HITS-CLIP           | Functional MTI (Weak) | 22473208 |
| MIRT133313 | hsa-miR-20a-5p | ORAI1    | 84876  | HITS-CLIP           | Functional MTI (Weak) | 22473208 |
| MIRT134275 | hsa-miR-20a-5p | DNM1L    | 10059  | HITS-CLIP           | Functional MTI (Weak) | 22473208 |
| MIRT135706 | hsa-miR-20a-5p | PIP4K2C  | 79837  | HITS-CLIP           | Functional MTI (Weak) | 22473208 |
| MIRT135793 | hsa-miR-20a-5p | GNS      | 2799   | HITS-CLIP           | Functional MTI (Weak) | 22473208 |
| MIRT136562 | hsa-miR-20a-5p | TXLNA    | 200081 | HITS-CLIP           | Functional MTI (Weak) | 22473208 |
| MIRT138110 | hsa-miR-20a-5p | BRMS1L   | 84312  | HITS-CLIP           | Functional MTI (Weak) | 22473208 |
| MIRT138348 | hsa-miR-20a-5p | FRMD6    | 122786 | HITS-CLIP           | Functional MTI (Weak) | 22473208 |
| MIRT138792 | hsa-miR-20a-5p | SUSD6    | 9766   | HITS-CLIP           | Functional MTI (Weak) | 22473208 |
| MIRT140626 | hsa-miR-20a-5p | PLEKH02  | 80301  | HITS-CLIP           | Functional MTI (Weak) | 22473208 |
| MIRT140794 | hsa-miR-20a-5p | SMAD6    | 4091   | HITS-CLIP           | Functional MTI (Weak) | 22473208 |
| MIRT141126 | hsa-miR-20a-5p | SCAMP5   | 192683 | HITS-CLIP           | Functional MTI (Weak) | 22473208 |
| MIRT141698 | hsa-miR-20a-5p | RCCD1    | 91433  | HITS-CLIP           | Functional MTI (Weak) | 22473208 |
| MIRT142095 | hsa-miR-20a-5p | CCP110   | 9738   | HITS-CLIP           | Functional MTI (Weak) | 22473208 |
| MIRT142381 | hsa-miR-20a-5p | TNRC6A   | 27327  | HITS-CLIP           | Functional MTI (Weak) | 22473208 |
| MIRT144207 | hsa-miR-20a-5p | SNTB2    | 6645   | HITS-CLIP           | Functional MTI (Weak) | 22473208 |

|            |                |          |        |                                                                    |                       |          |
|------------|----------------|----------|--------|--------------------------------------------------------------------|-----------------------|----------|
| MIRT144294 | hsa-miR-20a-5p | NFAT5    | 10725  | HITS-CLIP                                                          | Functional MTI (Weak) | 22473208 |
| MIRT144978 | hsa-miR-20a-5p | PAFAH1B1 | 5048   | HITS-CLIP                                                          | Functional MTI (Weak) | 22473208 |
| MIRT145019 | hsa-miR-20a-5p | TNFAIP1  | 7126   | HITS-CLIP                                                          | Functional MTI (Weak) | 22473208 |
| MIRT145597 | hsa-miR-20a-5p | LASP1    | 3927   | HITS-CLIP                                                          | Functional MTI (Weak) | 22473208 |
| MIRT146071 | hsa-miR-20a-5p | RUNDC1   | 146923 | HITS-CLIP                                                          | Functional MTI (Weak) | 22473208 |
| MIRT147118 | hsa-miR-20a-5p | MAP3K3   | 4215   | HITS-CLIP                                                          | Functional MTI (Weak) | 22473208 |
| MIRT147273 | hsa-miR-20a-5p | KPNA2    | 3838   | HITS-CLIP                                                          | Functional MTI (Weak) | 22473208 |
| MIRT147921 | hsa-miR-20a-5p | CAMTA1   | 23261  | HITS-CLIP                                                          | Functional MTI (Weak) | 22473208 |
| MIRT148868 | hsa-miR-20a-5p | ANKRD12  | 23253  | HITS-CLIP                                                          | Functional MTI (Weak) | 22473208 |
| MIRT151690 | hsa-miR-20a-5p | CHAF1A   | 10036  | HITS-CLIP                                                          | Functional MTI (Weak) | 22473208 |
| MIRT151799 | hsa-miR-20a-5p | BLOC1S3  | 388552 | HITS-CLIP                                                          | Functional MTI (Weak) | 22473208 |
| MIRT151853 | hsa-miR-20a-5p | ARHGAP35 | 2909   | HITS-CLIP                                                          | Functional MTI (Weak) | 22473208 |
| MIRT151932 | hsa-miR-20a-5p | TBC1D17  | 79735  | HITS-CLIP                                                          | Functional MTI (Weak) | 22473208 |
| MIRT152367 | hsa-miR-20a-5p | ARHGFE18 | 23370  | HITS-CLIP                                                          | Functional MTI (Weak) | 22473208 |
| MIRT152673 | hsa-miR-20a-5p | POFUT1   | 23509  | HITS-CLIP                                                          | Functional MTI (Weak) | 22473208 |
| MIRT153327 | hsa-miR-20a-5p | MAVS     | 57506  | PAR-CLIP                                                           | Functional MTI (Weak) | 21572407 |
| MIRT153454 | hsa-miR-20a-5p | TTPAL    | 79183  | HITS-CLIP                                                          | Functional MTI (Weak) | 22473208 |
| MIRT153969 | hsa-miR-20a-5p | PRNP     | 5621   | HITS-CLIP                                                          | Functional MTI (Weak) | 22473208 |
| MIRT155231 | hsa-miR-20a-5p | IFNAR2   | 3455   | HITS-CLIP                                                          | Functional MTI (Weak) | 22473208 |
| MIRT155333 | hsa-miR-20a-5p | IFNAR1   | 3454   | HITS-CLIP                                                          | Functional MTI (Weak) | 22473208 |
| MIRT155886 | hsa-miR-20a-5p | SIK1     | 150094 | PAR-CLIP                                                           | Functional MTI (Weak) | 21572407 |
| MIRT156404 | hsa-miR-20a-5p | RAPGEF4  | 11069  | HITS-CLIP                                                          | Functional MTI (Weak) | 22473208 |
| MIRT156640 | hsa-miR-20a-5p | C2orf69  | 205327 | HITS-CLIP                                                          | Functional MTI (Weak) | 22473208 |
| MIRT157145 | hsa-miR-20a-5p | FAM117B  | 150864 | HITS-CLIP                                                          | Functional MTI (Weak) | 22473208 |
| MIRT157585 | hsa-miR-20a-5p | MTMR3    | 8897   | HITS-CLIP                                                          | Functional MTI (Weak) | 22473208 |
| MIRT158288 | hsa-miR-20a-5p | ASB1     | 51665  | HITS-CLIP                                                          | Functional MTI (Weak) | 22473208 |
| MIRT158573 | hsa-miR-20a-5p | TNRC6B   | 23112  | PAR-CLIP                                                           | Functional MTI (Weak) | 23446348 |
| MIRT159105 | hsa-miR-20a-5p | NRBP1    | 29959  | HITS-CLIP                                                          | Functional MTI (Weak) | 22473208 |
| MIRT159399 | hsa-miR-20a-5p | FEZ2     | 9637   | HITS-CLIP                                                          | Functional MTI (Weak) | 22473208 |
| MIRT160004 | hsa-miR-20a-5p | TET3     | 200424 | HITS-CLIP                                                          | Functional MTI (Weak) | 22473208 |
| MIRT164198 | hsa-miR-20a-5p | GAB1     | 2549   | HITS-CLIP                                                          | Functional MTI (Weak) | 22473208 |
| MIRT164524 | hsa-miR-20a-5p | MSMO1    | 6307   | HITS-CLIP                                                          | Functional MTI (Weak) | 22473208 |
| MIRT164659 | hsa-miR-20a-5p | NSD2     | 7468   | HITS-CLIP                                                          | Functional MTI (Weak) | 22473208 |
| MIRT164720 | hsa-miR-20a-5p | ADD1     | 118    | HITS-CLIP                                                          | Functional MTI (Weak) | 22473208 |
| MIRT166062 | hsa-miR-20a-5p | FAF2     | 23197  | HITS-CLIP                                                          | Functional MTI (Weak) | 22473208 |
| MIRT167840 | hsa-miR-20a-5p | HECA     | 51696  | HITS-CLIP                                                          | Functional MTI (Weak) | 22473208 |
| MIRT168216 | hsa-miR-20a-5p | BTN3A2   | 11118  | HITS-CLIP                                                          | Functional MTI (Weak) | 22473208 |
| MIRT169663 | hsa-miR-20a-5p | AGFG2    | 3268   | HITS-CLIP                                                          | Functional MTI (Weak) | 22473208 |
| MIRT170564 | hsa-miR-20a-5p | CASP2    | 835    | HITS-CLIP                                                          | Functional MTI (Weak) | 22473208 |
| MIRT170849 | hsa-miR-20a-5p | TAX1BP1  | 8887   | HITS-CLIP                                                          | Functional MTI (Weak) | 22473208 |
| MIRT172197 | hsa-miR-20a-5p | OXR1     | 55074  | HITS-CLIP                                                          | Functional MTI (Weak) | 22473208 |
| MIRT173112 | hsa-miR-20a-5p | E2F5     | 1875   | HITS-CLIP                                                          | Functional MTI (Weak) | 22473208 |
| MIRT173688 | hsa-miR-20a-5p | PRPF4    | 9128   | HITS-CLIP                                                          | Functional MTI (Weak) | 22473208 |
| MIRT175379 | hsa-miR-20a-5p | ACSL4    | 2182   | PAR-CLIP//HITS-CLIP                                                | Functional MTI (Weak) | 21572407 |
| MIRT175594 | hsa-miR-20a-5p | OCRL     | 4952   | HITS-CLIP                                                          | Functional MTI (Weak) | 22473208 |
| MIRT175644 | hsa-miR-20a-5p | PHF6     | 84295  | HITS-CLIP                                                          | Functional MTI (Weak) | 22473208 |
| MIRT176079 | hsa-miR-20a-5p | CHIC1    | 53344  | HITS-CLIP                                                          | Functional MTI (Weak) | 22473208 |
| MIRT178062 | hsa-miR-20a-5p | SAMD8    | 142891 | PAR-CLIP                                                           | Functional MTI (Weak) | 21572407 |
| MIRT182517 | hsa-miR-20a-5p | ZBTB37   | 84614  | PAR-CLIP                                                           | Functional MTI (Weak) | 20371350 |
| MIRT187472 | hsa-miR-20a-5p | PCBP2    | 5094   | PAR-CLIP                                                           | Functional MTI (Weak) | 23446348 |
| MIRT188183 | hsa-miR-20a-5p | DYRK2    | 8445   | PAR-CLIP                                                           | Functional MTI (Weak) | 21572407 |
| MIRT194849 | hsa-miR-20a-5p | UBFD1    | 56061  | HITS-CLIP                                                          | Functional MTI (Weak) | 22473208 |
| MIRT199106 | hsa-miR-20a-5p | ZNF532   | 55205  | PAR-CLIP                                                           | Functional MTI (Weak) | 22012620 |
| MIRT199283 | hsa-miR-20a-5p | SH3GLB1  | 51100  | PAR-CLIP                                                           | Functional MTI (Weak) | 21572407 |
| MIRT200924 | hsa-miR-20a-5p | ZNF264   | 9422   | PAR-CLIP                                                           | Functional MTI (Weak) | 22012620 |
| MIRT201019 | hsa-miR-20a-5p | ZNF805   | 390980 | PAR-CLIP                                                           | Functional MTI (Weak) | 21572407 |
| MIRT205046 | hsa-miR-20a-5p | CREB1    | 1385   | PAR-CLIP                                                           | Functional MTI (Weak) | 23446348 |
| MIRT205281 | hsa-miR-20a-5p | STK11IP  | 114790 | PAR-CLIP                                                           | Functional MTI (Weak) | 21572407 |
| MIRT206192 | hsa-miR-20a-5p | RAB10    | 10890  | PAR-CLIP                                                           | Functional MTI (Weak) | 21572407 |
| MIRT208975 | hsa-miR-20a-5p | SKIL     | 6498   | PAR-CLIP                                                           | Functional MTI (Weak) | 24398324 |
| MIRT213203 | hsa-miR-20a-5p | REST     | 5978   | PAR-CLIP                                                           | Functional MTI (Weak) | 23446348 |
| MIRT213321 | hsa-miR-20a-5p | KIAA0232 | 9778   | HITS-CLIP                                                          | Functional MTI (Weak) | 23824327 |
| MIRT216423 | hsa-miR-20a-5p | SERF1A   | 8293   | PAR-CLIP                                                           | Functional MTI (Weak) | 22012620 |
| MIRT216448 | hsa-miR-20a-5p | SERF1B   | 728492 | PAR-CLIP                                                           | Functional MTI (Weak) | 22012620 |
| MIRT216661 | hsa-miR-20a-5p | F2R      | 2149   | PAR-CLIP                                                           | Functional MTI (Weak) | 20371350 |
| MIRT220118 | hsa-miR-20a-5p | CAV1     | 857    | PAR-CLIP                                                           | Functional MTI (Weak) | 20371350 |
| MIRT222673 | hsa-miR-20a-5p | EIF4H    | 7458   | PAR-CLIP                                                           | Functional MTI (Weak) | 22012620 |
| MIRT222908 | hsa-miR-20a-5p | CROT     | 54677  | HITS-CLIP                                                          | Functional MTI (Weak) | 22473208 |
| MIRT224747 | hsa-miR-20a-5p | DPYSL2   | 1808   | PAR-CLIP                                                           | Functional MTI (Weak) | 22012620 |
| MIRT224885 | hsa-miR-20a-5p | MAK16    | 84549  | HITS-CLIP                                                          | Functional MTI (Weak) | 22473208 |
| MIRT227326 | hsa-miR-20a-5p | TRIM32   | 22954  | HITS-CLIP                                                          | Functional MTI (Weak) | 22473208 |
| MIRT230965 | hsa-miR-20a-5p | PRRG4    | 79056  | PAR-CLIP                                                           | Functional MTI (Weak) | 20371350 |
| MIRT238172 | hsa-miR-20a-5p | ANKRD33B | 651746 | PAR-CLIP                                                           | Functional MTI (Weak) | 23592263 |
| MIRT241294 | hsa-miR-20a-5p | ZC3H12C  | 85463  | PAR-CLIP                                                           | Functional MTI (Weak) | 23446348 |
| MIRT242196 | hsa-miR-20a-5p | TTC9     | 23508  | PAR-CLIP                                                           | Functional MTI (Weak) | 23446348 |
| MIRT242657 | hsa-miR-20a-5p | SALL3    | 27164  | PAR-CLIP                                                           | Functional MTI (Weak) | 22012620 |
| MIRT243778 | hsa-miR-20a-5p | AFF1     | 4299   | HITS-CLIP                                                          | Functional MTI (Weak) | 22473208 |
| MIRT244588 | hsa-miR-20a-5p | HOOK3    | 84376  | HITS-CLIP                                                          | Functional MTI (Weak) | 23313552 |
| MIRT244945 | hsa-miR-20a-5p | PRRG1    | 5638   | In situ hybridization/Next Generation Sequencing (NGS)/qRT-PCR     | Functional MTI (Weak) | 26233958 |
| MIRT246959 | hsa-miR-20a-5p | TSKU     | 25987  | PAR-CLIP                                                           | Functional MTI (Weak) | 20371350 |
| MIRT247079 | hsa-miR-20a-5p | CEP57    | 9702   | HITS-CLIP                                                          | Functional MTI (Weak) | 22473208 |
| MIRT248850 | hsa-miR-20a-5p | SESN2    | 83667  | HITS-CLIP                                                          | Functional MTI (Weak) | 22473208 |
| MIRT250444 | hsa-miR-20a-5p | NFATC2IP | 84901  | HITS-CLIP                                                          | Functional MTI (Weak) | 22473208 |
| MIRT254248 | hsa-miR-20a-5p | TRAPPC10 | 7109   | HITS-CLIP                                                          | Functional MTI (Weak) | 22473208 |
| MIRT257279 | hsa-miR-20a-5p | FOXC1    | 2296   | PAR-CLIP                                                           | Functional MTI (Weak) | 21572407 |
| MIRT266048 | hsa-miR-20a-5p | FJX1     | 24147  | PAR-CLIP                                                           | Functional MTI (Weak) | 21572407 |
| MIRT266853 | hsa-miR-20a-5p | SLC25A44 | 9673   | PAR-CLIP                                                           | Functional MTI (Weak) | 21572407 |
| MIRT280207 | hsa-miR-20a-5p | EIF2B2   | 8892   | HITS-CLIP                                                          | Functional MTI (Weak) | 23313552 |
| MIRT280991 | hsa-miR-20a-5p | SPRED1   | 161742 | PAR-CLIP                                                           | Functional MTI (Weak) | 23592263 |
| MIRT283172 | hsa-miR-20a-5p | C16orf52 | 730094 | PAR-CLIP                                                           | Functional MTI (Weak) | 21572407 |
| MIRT286945 | hsa-miR-20a-5p | SOC57    | 30837  | PAR-CLIP                                                           | Functional MTI (Weak) | 21572407 |
| MIRT289571 | hsa-miR-20a-5p | KDM6B    | 23135  | PAR-CLIP                                                           | Functional MTI (Weak) | 20371350 |
| MIRT291931 | hsa-miR-20a-5p | TPM4     | 7171   | PAR-CLIP                                                           | Functional MTI (Weak) | 23592263 |
| MIRT293645 | hsa-miR-20a-5p | PVR      | 5817   | PAR-CLIP                                                           | Functional MTI (Weak) | 21572407 |
| MIRT296868 | hsa-miR-20a-5p | REV1     | 51455  | HITS-CLIP                                                          | Functional MTI (Weak) | 22473208 |
| MIRT299337 | hsa-miR-20a-5p | CYBRD1   | 79901  | HITS-CLIP                                                          | Functional MTI (Weak) | 22473208 |
| MIRT302434 | hsa-miR-20a-5p | CLIP4    | 79745  | PAR-CLIP                                                           | Functional MTI (Weak) | 20371350 |
| MIRT303488 | hsa-miR-20a-5p | NAGK     | 55577  | PAR-CLIP                                                           | Functional MTI (Weak) | 23446348 |
| MIRT322520 | hsa-miR-20a-5p | HMBOX1   | 79618  | PAR-CLIP                                                           | Functional MTI (Weak) | 22012620 |
| MIRT325510 | hsa-miR-20a-5p | PTPDC1   | 138639 | PAR-CLIP                                                           | Functional MTI (Weak) | 21572407 |
| MIRT363922 | hsa-miR-20a-5p | UBE2V2   | 7336   | HITS-CLIP                                                          | Functional MTI (Weak) | 23313552 |
| MIRT368882 | hsa-miR-20a-5p | BCL2L2   | 599    | PAR-CLIP                                                           | Functional MTI (Weak) | 23446348 |
| MIRT397684 | hsa-miR-20a-5p | ATXN7L3B | 552889 | PAR-CLIP                                                           | Functional MTI (Weak) | 23592263 |
| MIRT400046 | hsa-miR-20a-5p | GRK3     | 157    | HITS-CLIP                                                          | Functional MTI (Weak) | 23824327 |
| MIRT437765 | hsa-miR-20a-5p | PRKG1    | 5592   | Immunocytochemistry/Luciferase reporter assay/qRT-PCR/Western blot | Functional MTI        | 25447536 |

|            |                |           |        |                                                               |                       |          |
|------------|----------------|-----------|--------|---------------------------------------------------------------|-----------------------|----------|
| MIRT437944 | hsa-miR-20a-5p | RGS5      | 8490   | ChIP-seq/qRT-PCR/Luciferase reporter assay                    | Functional MTI        | 23308108 |
| MIRT438054 | hsa-miR-20a-5p | ETV1      | 2115   | Luciferase reporter assay/qRT-PCR/microarray/Western blotting | Functional MTI        | 23969726 |
| MIRT438160 | hsa-miR-20a-5p | EPAS1     | 2034   | Luciferase reporter assay                                     | Functional MTI        | 24194900 |
| MIRT438351 | hsa-miR-20a-5p | FBXO31    | 79791  | HITS-CLIP                                                     | Functional MTI (Weak) | 22473208 |
| MIRT438791 | hsa-miR-20a-5p | TP53      | 7157   | qRT-PCR                                                       | Functional MTI (Weak) | 24955218 |
| MIRT438806 | hsa-miR-20a-5p | DNMT1     | 1786   | Luciferase reporter assay                                     | Functional MTI        | 23306545 |
| MIRT438812 | hsa-miR-20a-5p | PKD1      | 5310   | Luciferase reporter assay                                     | Functional MTI        | 23344677 |
| MIRT439181 | hsa-miR-20a-5p | ZNF800    | 168850 | HITS-CLIP                                                     | Functional MTI (Weak) | 22473208 |
| MIRT439185 | hsa-miR-20a-5p | ZNF770    | 54989  | HITS-CLIP                                                     | Functional MTI (Weak) | 22473208 |
| MIRT439192 | hsa-miR-20a-5p | ZNF597    | 146434 | HITS-CLIP                                                     | Functional MTI (Weak) | 22473208 |
| MIRT439211 | hsa-miR-20a-5p | ZNF280C   | 55609  | HITS-CLIP                                                     | Functional MTI (Weak) | 22473208 |
| MIRT439214 | hsa-miR-20a-5p | ZNF280B   | 140883 | HITS-CLIP                                                     | Functional MTI (Weak) | 22473208 |
| MIRT439225 | hsa-miR-20a-5p | ZNF12     | 7559   | HITS-CLIP                                                     | Functional MTI (Weak) | 22473208 |
| MIRT439256 | hsa-miR-20a-5p | ZBTB7A    | 51341  | HITS-CLIP                                                     | Functional MTI (Weak) | 22473208 |
| MIRT439257 | hsa-miR-20a-5p | ZBTB6     | 10773  | HITS-CLIP                                                     | Functional MTI (Weak) | 22473208 |
| MIRT439259 | hsa-miR-20a-5p | ZBTB4     | 57659  | HITS-CLIP                                                     | Functional MTI (Weak) | 22473208 |
| MIRT439269 | hsa-miR-20a-5p | YOD1      | 55432  | HITS-CLIP                                                     | Functional MTI (Weak) | 22473208 |
| MIRT439286 | hsa-miR-20a-5p | WDR89     | 112840 | HITS-CLIP                                                     | Functional MTI (Weak) | 22473208 |
| MIRT439291 | hsa-miR-20a-5p | WDR1      | 9948   | HITS-CLIP                                                     | Functional MTI (Weak) | 22473208 |
| MIRT439295 | hsa-miR-20a-5p | VTG1A     | 143187 | HITS-CLIP                                                     | Functional MTI (Weak) | 22473208 |
| MIRT439300 | hsa-miR-20a-5p | VPS13C    | 54832  | HITS-CLIP                                                     | Functional MTI (Weak) | 22473208 |
| MIRT439306 | hsa-miR-20a-5p | VDAC1     | 7416   | HITS-CLIP                                                     | Functional MTI (Weak) | 22473208 |
| MIRT439319 | hsa-miR-20a-5p | UXS1      | 80146  | HITS-CLIP                                                     | Functional MTI (Weak) | 22473208 |
| MIRT439327 | hsa-miR-20a-5p | USP32     | 84669  | HITS-CLIP                                                     | Functional MTI (Weak) | 22473208 |
| MIRT439332 | hsa-miR-20a-5p | USP28     | 57646  | HITS-CLIP                                                     | Functional MTI (Weak) | 22473208 |
| MIRT439337 | hsa-miR-20a-5p | USP16     | 10600  | HITS-CLIP                                                     | Functional MTI (Weak) | 22473208 |
| MIRT439349 | hsa-miR-20a-5p | UBR5      | 51366  | HITS-CLIP                                                     | Functional MTI (Weak) | 22473208 |
| MIRT439366 | hsa-miR-20a-5p | UBC       | 7316   | HITS-CLIP                                                     | Functional MTI (Weak) | 22473208 |
| MIRT439372 | hsa-miR-20a-5p | TWF1      | 5756   | HITS-CLIP                                                     | Functional MTI (Weak) | 22473208 |
| MIRT439399 | hsa-miR-20a-5p | TOPORS    | 10210  | HITS-CLIP                                                     | Functional MTI (Weak) | 22473208 |
| MIRT439410 | hsa-miR-20a-5p | TNFRSF21  | 27242  | HITS-CLIP                                                     | Functional MTI (Weak) | 22473208 |
| MIRT439416 | hsa-miR-20a-5p | TMX3      | 54495  | HITS-CLIP                                                     | Functional MTI (Weak) | 22473208 |
| MIRT439423 | hsa-miR-20a-5p | TMEM67    | 91147  | HITS-CLIP                                                     | Functional MTI (Weak) | 22473208 |
| MIRT439427 | hsa-miR-20a-5p | TMEM64    | 169200 | HITS-CLIP                                                     | Functional MTI (Weak) | 22473208 |
| MIRT439435 | hsa-miR-20a-5p | TMEM167A  | 153339 | HITS-CLIP                                                     | Functional MTI (Weak) | 22473208 |
| MIRT439439 | hsa-miR-20a-5p | TMEM127   | 55654  | HITS-CLIP                                                     | Functional MTI (Weak) | 22473208 |
| MIRT439440 | hsa-miR-20a-5p | TMEM123   | 114908 | HITS-CLIP                                                     | Functional MTI (Weak) | 22473208 |
| MIRT439460 | hsa-miR-20a-5p | TGOLN2    | 10618  | HITS-CLIP                                                     | Functional MTI (Weak) | 22473208 |
| MIRT439478 | hsa-miR-20a-5p | TCF4      | 6925   | HITS-CLIP                                                     | Functional MTI (Weak) | 22473208 |
| MIRT439489 | hsa-miR-20a-5p | TADA2B    | 93624  | HITS-CLIP                                                     | Functional MTI (Weak) | 22473208 |
| MIRT439512 | hsa-miR-20a-5p | STX6      | 10228  | HITS-CLIP                                                     | Functional MTI (Weak) | 22473208 |
| MIRT439521 | hsa-miR-20a-5p | STK17B    | 9262   | HITS-CLIP                                                     | Functional MTI (Weak) | 22473208 |
| MIRT439535 | hsa-miR-20a-5p | SSX2IP    | 117178 | HITS-CLIP                                                     | Functional MTI (Weak) | 22473208 |
| MIRT439537 | hsa-miR-20a-5p | SSH2      | 85464  | HITS-CLIP                                                     | Functional MTI (Weak) | 22473208 |
| MIRT439566 | hsa-miR-20a-5p | SOD2      | 6648   | HITS-CLIP                                                     | Functional MTI (Weak) | 22473208 |
| MIRT439590 | hsa-miR-20a-5p | SLK       | 9748   | HITS-CLIP                                                     | Functional MTI (Weak) | 22473208 |
| MIRT439594 | hsa-miR-20a-5p | SLC4A7    | 9497   | HITS-CLIP                                                     | Functional MTI (Weak) | 22473208 |
| MIRT439606 | hsa-miR-20a-5p | SLC35F5   | 80255  | HITS-CLIP                                                     | Functional MTI (Weak) | 22473208 |
| MIRT439620 | hsa-miR-20a-5p | SLC16A9   | 220963 | HITS-CLIP                                                     | Functional MTI (Weak) | 22473208 |
| MIRT439633 | hsa-miR-20a-5p | SIKE1     | 80143  | HITS-CLIP                                                     | Functional MTI (Weak) | 22473208 |
| MIRT439644 | hsa-miR-20a-5p | SGTB      | 54557  | HITS-CLIP                                                     | Functional MTI (Weak) | 22473208 |
| MIRT439648 | hsa-miR-20a-5p | PEAK1     | 79834  | HITS-CLIP                                                     | Functional MTI (Weak) | 22473208 |
| MIRT439654 | hsa-miR-20a-5p | SRSF2     | 6427   | HITS-CLIP                                                     | Functional MTI (Weak) | 22473208 |
| MIRT439680 | hsa-miR-20a-5p | SENP1     | 29843  | HITS-CLIP                                                     | Functional MTI (Weak) | 22473208 |
| MIRT439688 | hsa-miR-20a-5p | SEC23A    | 10484  | HITS-CLIP                                                     | Functional MTI (Weak) | 22473208 |
| MIRT439692 | hsa-miR-20a-5p | SEC16A    | 9919   | HITS-CLIP                                                     | Functional MTI (Weak) | 22473208 |
| MIRT439703 | hsa-miR-20a-5p | SCAMP2    | 10066  | HITS-CLIP                                                     | Functional MTI (Weak) | 22473208 |
| MIRT439711 | hsa-miR-20a-5p | SAMD9L    | 219285 | HITS-CLIP                                                     | Functional MTI (Weak) | 22473208 |
| MIRT439715 | hsa-miR-20a-5p | SACS      | 26278  | HITS-CLIP                                                     | Functional MTI (Weak) | 22473208 |
| MIRT439742 | hsa-miR-20a-5p | RPL17     | 6139   | HITS-CLIP                                                     | Functional MTI (Weak) | 22473208 |
| MIRT439758 | hsa-miR-20a-5p | RNF216    | 54476  | HITS-CLIP                                                     | Functional MTI (Weak) | 22473208 |
| MIRT439776 | hsa-miR-20a-5p | REFXANK   | 8625   | HITS-CLIP                                                     | Functional MTI (Weak) | 22473208 |
| MIRT439786 | hsa-miR-20a-5p | REEP5     | 7905   | HITS-CLIP                                                     | Functional MTI (Weak) | 22473208 |
| MIRT439809 | hsa-miR-20a-5p | RBBP7     | 5931   | HITS-CLIP                                                     | Functional MTI (Weak) | 22473208 |
| MIRT439821 | hsa-miR-20a-5p | RAN       | 5901   | HITS-CLIP                                                     | Functional MTI (Weak) | 22473208 |
| MIRT439832 | hsa-miR-20a-5p | RABEP1    | 9135   | HITS-CLIP                                                     | Functional MTI (Weak) | 22473208 |
| MIRT439837 | hsa-miR-20a-5p | RAB30     | 27314  | HITS-CLIP                                                     | Functional MTI (Weak) | 22473208 |
| MIRT439848 | hsa-miR-20a-5p | RAB11FIP1 | 80223  | HITS-CLIP                                                     | Functional MTI (Weak) | 22473208 |
| MIRT439853 | hsa-miR-20a-5p | PURB      | 5814   | HITS-CLIP                                                     | Functional MTI (Weak) | 22473208 |
| MIRT439863 | hsa-miR-20a-5p | PTPN4     | 5775   | HITS-CLIP                                                     | Functional MTI (Weak) | 22473208 |
| MIRT439874 | hsa-miR-20a-5p | PTGES3    | 10728  | HITS-CLIP                                                     | Functional MTI (Weak) | 22473208 |
| MIRT439875 | hsa-miR-20a-5p | PTGER4    | 5734   | HITS-CLIP                                                     | Functional MTI (Weak) | 22473208 |
| MIRT439905 | hsa-miR-20a-5p | PPP6C     | 5537   | HITS-CLIP                                                     | Functional MTI (Weak) | 22473208 |
| MIRT439910 | hsa-miR-20a-5p | PPP3R1    | 5534   | HITS-CLIP                                                     | Functional MTI (Weak) | 22473208 |
| MIRT439915 | hsa-miR-20a-5p | PPP1R3B   | 79660  | HITS-CLIP                                                     | Functional MTI (Weak) | 22473208 |
| MIRT439933 | hsa-miR-20a-5p | POLQ      | 10721  | HITS-CLIP                                                     | Functional MTI (Weak) | 22473208 |
| MIRT439940 | hsa-miR-20a-5p | PNPLA4    | 8228   | HITS-CLIP                                                     | Functional MTI (Weak) | 22473208 |
| MIRT439954 | hsa-miR-20a-5p | PLAGL2    | 5326   | HITS-CLIP                                                     | Functional MTI (Weak) | 22473208 |
| MIRT439959 | hsa-miR-20a-5p | PKMYT1    | 9088   | HITS-CLIP                                                     | Functional MTI (Weak) | 22473208 |
| MIRT439971 | hsa-miR-20a-5p | PIP4K2A   | 5305   | HITS-CLIP                                                     | Functional MTI (Weak) | 22473208 |
| MIRT439977 | hsa-miR-20a-5p | PIGO      | 84720  | HITS-CLIP                                                     | Functional MTI (Weak) | 22473208 |
| MIRT439991 | hsa-miR-20a-5p | PGM2L1    | 283209 | HITS-CLIP                                                     | Functional MTI (Weak) | 22473208 |
| MIRT440006 | hsa-miR-20a-5p | PDZD11    | 51248  | HITS-CLIP                                                     | Functional MTI (Weak) | 22473208 |
| MIRT440025 | hsa-miR-20a-5p | PCMTD1    | 115294 | HITS-CLIP                                                     | Functional MTI (Weak) | 22473208 |
| MIRT440046 | hsa-miR-20a-5p | PANK3     | 79646  | HITS-CLIP                                                     | Functional MTI (Weak) | 22473208 |
| MIRT440068 | hsa-miR-20a-5p | NUP98     | 4928   | HITS-CLIP                                                     | Functional MTI (Weak) | 22473208 |
| MIRT440072 | hsa-miR-20a-5p | NUP35     | 129401 | HITS-CLIP                                                     | Functional MTI (Weak) | 22473208 |
| MIRT440093 | hsa-miR-20a-5p | NR2C2     | 7182   | HITS-CLIP                                                     | Functional MTI (Weak) | 22473208 |
| MIRT440099 | hsa-miR-20a-5p | NPAT      | 4863   | HITS-CLIP                                                     | Functional MTI (Weak) | 22473208 |
| MIRT440112 | hsa-miR-20a-5p | NIPAI1    | 123606 | HITS-CLIP                                                     | Functional MTI (Weak) | 22473208 |
| MIRT440138 | hsa-miR-20a-5p | NCAPD2    | 9918   | HITS-CLIP                                                     | Functional MTI (Weak) | 22473208 |
| MIRT440145 | hsa-miR-20a-5p | NAA50     | 80218  | HITS-CLIP                                                     | Functional MTI (Weak) | 22473208 |
| MIRT440158 | hsa-miR-20a-5p | N4BP1     | 9683   | HITS-CLIP                                                     | Functional MTI (Weak) | 22473208 |
| MIRT440170 | hsa-miR-20a-5p | MXI1      | 4601   | HITS-CLIP                                                     | Functional MTI (Weak) | 22473208 |
| MIRT440208 | hsa-miR-20a-5p | MTF1      | 4520   | HITS-CLIP                                                     | Functional MTI (Weak) | 22473208 |
| MIRT440233 | hsa-miR-20a-5p | MKRN1     | 23608  | HITS-CLIP                                                     | Functional MTI (Weak) | 22473208 |
| MIRT440235 | hsa-miR-20a-5p | MKNK2     | 2872   | HITS-CLIP                                                     | Functional MTI (Weak) | 22473208 |
| MIRT440260 | hsa-miR-20a-5p | MECP2     | 4204   | HITS-CLIP                                                     | Functional MTI (Weak) | 22473208 |
| MIRT440278 | hsa-miR-20a-5p | MAPK1     | 5594   | HITS-CLIP                                                     | Functional MTI (Weak) | 22473208 |
| MIRT440284 | hsa-miR-20a-5p | MAP3K2    | 10746  | HITS-CLIP                                                     | Functional MTI (Weak) | 22473208 |
| MIRT440286 | hsa-miR-20a-5p | MAP3K14   | 9020   | HITS-CLIP                                                     | Functional MTI (Weak) | 22473208 |
| MIRT440296 | hsa-miR-20a-5p | M6PR      | 4074   | HITS-CLIP                                                     | Functional MTI (Weak) | 22473208 |
| MIRT440318 | hsa-miR-20a-5p | LPGAT1    | 9926   | HITS-CLIP                                                     | Functional MTI (Weak) | 22473208 |
| MIRT440325 | hsa-miR-20a-5p | LIMA1     | 51474  | HITS-CLIP                                                     | Functional MTI (Weak) | 22473208 |
| MIRT440340 | hsa-miR-20a-5p | LAPTM4A   | 9741   | HITS-CLIP                                                     | Functional MTI (Weak) | 22473208 |

|            |                |          |        |           |                       |          |
|------------|----------------|----------|--------|-----------|-----------------------|----------|
| MIRT440346 | hsa-miR-20a-5p | LAMC1    | 3915   | HITS-CLIP | Functional MTI (Weak) | 22473208 |
| MIRT440357 | hsa-miR-20a-5p | KLHL28   | 54813  | HITS-CLIP | Functional MTI (Weak) | 22473208 |
| MIRT440369 | hsa-miR-20a-5p | KIF23    | 9493   | HITS-CLIP | Functional MTI (Weak) | 22473208 |
| MIRT440386 | hsa-miR-20a-5p | CCSER2   | 54462  | HITS-CLIP | Functional MTI (Weak) | 22473208 |
| MIRT440388 | hsa-miR-20a-5p | ATG14    | 22863  | HITS-CLIP | Functional MTI (Weak) | 22473208 |
| MIRT440391 | hsa-miR-20a-5p | EFCAB14  | 9813   | HITS-CLIP | Functional MTI (Weak) | 22473208 |
| MIRT440410 | hsa-miR-20a-5p | KATNAL1  | 84056  | HITS-CLIP | Functional MTI (Weak) | 22473208 |
| MIRT440417 | hsa-miR-20a-5p | ITPKB    | 3707   | HITS-CLIP | Functional MTI (Weak) | 22473208 |
| MIRT440427 | hsa-miR-20a-5p | ITCH     | 83737  | HITS-CLIP | Functional MTI (Weak) | 22473208 |
| MIRT440430 | hsa-miR-20a-5p | IQSEC1   | 9922   | HITS-CLIP | Functional MTI (Weak) | 22473208 |
| MIRT440451 | hsa-miR-20a-5p | INPP5F   | 22876  | HITS-CLIP | Functional MTI (Weak) | 22473208 |
| MIRT440469 | hsa-miR-20a-5p | IER3     | 8870   | HITS-CLIP | Functional MTI (Weak) | 22473208 |
| MIRT440506 | hsa-miR-20a-5p | HIF1AN   | 55662  | HITS-CLIP | Functional MTI (Weak) | 22473208 |
| MIRT440509 | hsa-miR-20a-5p | HAUS8    | 93323  | HITS-CLIP | Functional MTI (Weak) | 22473208 |
| MIRT440520 | hsa-miR-20a-5p | HCP5     | 10866  | HITS-CLIP | Functional MTI (Weak) | 22473208 |
| MIRT440537 | hsa-miR-20a-5p | GPAM     | 57678  | HITS-CLIP | Functional MTI (Weak) | 22473208 |
| MIRT440543 | hsa-miR-20a-5p | GOLGA1   | 2800   | HITS-CLIP | Functional MTI (Weak) | 22473208 |
| MIRT440557 | hsa-miR-20a-5p | GNAS     | 2778   | HITS-CLIP | Functional MTI (Weak) | 22473208 |
| MIRT440561 | hsa-miR-20a-5p | GLO1     | 2739   | HITS-CLIP | Functional MTI (Weak) | 22473208 |
| MIRT440573 | hsa-miR-20a-5p | GIGYF1   | 64599  | HITS-CLIP | Functional MTI (Weak) | 22473208 |
| MIRT440583 | hsa-miR-20a-5p | GBP3     | 2635   | HITS-CLIP | Functional MTI (Weak) | 22473208 |
| MIRT440590 | hsa-miR-20a-5p | GAK      | 2580   | HITS-CLIP | Functional MTI (Weak) | 22473208 |
| MIRT440593 | hsa-miR-20a-5p | GABPB1   | 2553   | HITS-CLIP | Functional MTI (Weak) | 22473208 |
| MIRT440595 | hsa-miR-20a-5p | GABBR1   | 2550   | HITS-CLIP | Functional MTI (Weak) | 22473208 |
| MIRT440601 | hsa-miR-20a-5p | FYCO1    | 79443  | HITS-CLIP | Functional MTI (Weak) | 22473208 |
| MIRT440609 | hsa-miR-20a-5p | CMTR2    | 55783  | HITS-CLIP | Functional MTI (Weak) | 22473208 |
| MIRT440633 | hsa-miR-20a-5p | FMNL3    | 91010  | HITS-CLIP | Functional MTI (Weak) | 22473208 |
| MIRT440646 | hsa-miR-20a-5p | FEM1C    | 56929  | HITS-CLIP | Functional MTI (Weak) | 22473208 |
| MIRT440653 | hsa-miR-20a-5p | FBXO48   | 554251 | HITS-CLIP | Functional MTI (Weak) | 22473208 |
| MIRT440657 | hsa-miR-20a-5p | FBXO21   | 23014  | HITS-CLIP | Functional MTI (Weak) | 22473208 |
| MIRT440660 | hsa-miR-20a-5p | FBXO10   | 26267  | HITS-CLIP | Functional MTI (Weak) | 22473208 |
| MIRT440662 | hsa-miR-20a-5p | FBXL5    | 26234  | HITS-CLIP | Functional MTI (Weak) | 22473208 |
| MIRT440674 | hsa-miR-20a-5p | FAM83D   | 81610  | HITS-CLIP | Functional MTI (Weak) | 22473208 |
| MIRT440677 | hsa-miR-20a-5p | FAM57A   | 79850  | HITS-CLIP | Functional MTI (Weak) | 22473208 |
| MIRT440685 | hsa-miR-20a-5p | FAM129A  | 116496 | HITS-CLIP | Functional MTI (Weak) | 22473208 |
| MIRT440686 | hsa-miR-20a-5p | FAM126B  | 285172 | HITS-CLIP | Functional MTI (Weak) | 22473208 |
| MIRT440693 | hsa-miR-20a-5p | FAM102A  | 399665 | HITS-CLIP | Functional MTI (Weak) | 22473208 |
| MIRT440699 | hsa-miR-20a-5p | EZH1     | 2145   | HITS-CLIP | Functional MTI (Weak) | 22473208 |
| MIRT440703 | hsa-miR-20a-5p | ETF1     | 2107   | HITS-CLIP | Functional MTI (Weak) | 22473208 |
| MIRT440712 | hsa-miR-20a-5p | ERAP1    | 51752  | HITS-CLIP | Functional MTI (Weak) | 22473208 |
| MIRT440720 | hsa-miR-20a-5p | ENTPD7   | 57089  | HITS-CLIP | Functional MTI (Weak) | 22473208 |
| MIRT440729 | hsa-miR-20a-5p | EIF5A2   | 56648  | HITS-CLIP | Functional MTI (Weak) | 22473208 |
| MIRT440752 | hsa-miR-20a-5p | EEA1     | 8411   | HITS-CLIP | Functional MTI (Weak) | 22473208 |
| MIRT440755 | hsa-miR-20a-5p | E2F2     | 1870   | HITS-CLIP | Functional MTI (Weak) | 22473208 |
| MIRT440759 | hsa-miR-20a-5p | DYNC1L12 | 1783   | HITS-CLIP | Functional MTI (Weak) | 22473208 |
| MIRT440767 | hsa-miR-20a-5p | DUSP18   | 150290 | HITS-CLIP | Functional MTI (Weak) | 22473208 |
| MIRT440797 | hsa-miR-20a-5p | DNAJC27  | 51277  | HITS-CLIP | Functional MTI (Weak) | 22473208 |
| MIRT440826 | hsa-miR-20a-5p | DENND5B  | 160518 | HITS-CLIP | Functional MTI (Weak) | 22473208 |
| MIRT440840 | hsa-miR-20a-5p | DDHD1    | 80821  | HITS-CLIP | Functional MTI (Weak) | 22473208 |
| MIRT440857 | hsa-miR-20a-5p | CTSS     | 1520   | HITS-CLIP | Functional MTI (Weak) | 22473208 |
| MIRT440873 | hsa-miR-20a-5p | CRTC3    | 64784  | HITS-CLIP | Functional MTI (Weak) | 22473208 |
| MIRT440876 | hsa-miR-20a-5p | CRK      | 1398   | HITS-CLIP | Functional MTI (Weak) | 22473208 |
| MIRT440886 | hsa-miR-20a-5p | CPOX     | 1371   | HITS-CLIP | Functional MTI (Weak) | 22473208 |
| MIRT440918 | hsa-miR-20a-5p | CNOT7    | 29883  | HITS-CLIP | Functional MTI (Weak) | 22473208 |
| MIRT440933 | hsa-miR-20a-5p | CLOCK    | 9575   | HITS-CLIP | Functional MTI (Weak) | 22473208 |
| MIRT440941 | hsa-miR-20a-5p | CIT      | 11113  | HITS-CLIP | Functional MTI (Weak) | 22473208 |
| MIRT440943 | hsa-miR-20a-5p | CHURC1   | 91612  | HITS-CLIP | Functional MTI (Weak) | 22473208 |
| MIRT440953 | hsa-miR-20a-5p | CFL2     | 1073   | HITS-CLIP | Functional MTI (Weak) | 22473208 |
| MIRT440954 | hsa-miR-20a-5p | CEP97    | 79598  | HITS-CLIP | Functional MTI (Weak) | 22473208 |
| MIRT440976 | hsa-miR-20a-5p | CD47     | 961    | HITS-CLIP | Functional MTI (Weak) | 22473208 |
| MIRT440986 | hsa-miR-20a-5p | CCL1     | 6346   | HITS-CLIP | Functional MTI (Weak) | 22473208 |
| MIRT441010 | hsa-miR-20a-5p | CAPRN2   | 65981  | HITS-CLIP | Functional MTI (Weak) | 22473208 |
| MIRT441022 | hsa-miR-20a-5p | CAMK2N2  | 94032  | HITS-CLIP | Functional MTI (Weak) | 22473208 |
| MIRT441030 | hsa-miR-20a-5p | TMEM245  | 23731  | HITS-CLIP | Functional MTI (Weak) | 22473208 |
| MIRT441031 | hsa-miR-20a-5p | C9orf40  | 55071  | HITS-CLIP | Functional MTI (Weak) | 22473208 |
| MIRT441033 | hsa-miR-20a-5p | BMT2     | 154743 | HITS-CLIP | Functional MTI (Weak) | 22473208 |
| MIRT441036 | hsa-miR-20a-5p | C7orf43  | 55262  | HITS-CLIP | Functional MTI (Weak) | 22473208 |
| MIRT441043 | hsa-miR-20a-5p | TMEM267  | 64417  | HITS-CLIP | Functional MTI (Weak) | 22473208 |
| MIRT441050 | hsa-miR-20a-5p | PRR14L   | 253143 | HITS-CLIP | Functional MTI (Weak) | 22473208 |
| MIRT441055 | hsa-miR-20a-5p | SUCO     | 51430  | HITS-CLIP | Functional MTI (Weak) | 22473208 |
| MIRT441057 | hsa-miR-20a-5p | RSRP1    | 57035  | HITS-CLIP | Functional MTI (Weak) | 22473208 |
| MIRT441073 | hsa-miR-20a-5p | FAM210A  | 125228 | HITS-CLIP | Functional MTI (Weak) | 22473208 |
| MIRT441080 | hsa-miR-20a-5p | ELMSAN1  | 91748  | HITS-CLIP | Functional MTI (Weak) | 22473208 |
| MIRT441082 | hsa-miR-20a-5p | C14orf28 | 122525 | HITS-CLIP | Functional MTI (Weak) | 22473208 |
| MIRT441084 | hsa-miR-20a-5p | VCPKMT   | 79609  | HITS-CLIP | Functional MTI (Weak) | 22473208 |
| MIRT441088 | hsa-miR-20a-5p | EMSY     | 56946  | HITS-CLIP | Functional MTI (Weak) | 22473208 |
| MIRT441094 | hsa-miR-20a-5p | BTN3A3   | 10384  | HITS-CLIP | Functional MTI (Weak) | 22473208 |
| MIRT441097 | hsa-miR-20a-5p | BTBD7    | 55727  | HITS-CLIP | Functional MTI (Weak) | 22473208 |
| MIRT441126 | hsa-miR-20a-5p | BAGE5    | 85316  | HITS-CLIP | Functional MTI (Weak) | 22473208 |
| MIRT441138 | hsa-miR-20a-5p | ATXN1    | 6310   | HITS-CLIP | Functional MTI (Weak) | 22473208 |
| MIRT441150 | hsa-miR-20a-5p | ATP2B1   | 490    | HITS-CLIP | Functional MTI (Weak) | 22473208 |
| MIRT441164 | hsa-miR-20a-5p | ATG2B    | 55102  | HITS-CLIP | Functional MTI (Weak) | 22473208 |
| MIRT441167 | hsa-miR-20a-5p | ATG2A    | 23130  | HITS-CLIP | Functional MTI (Weak) | 22473208 |
| MIRT441187 | hsa-miR-20a-5p | ARL1     | 400    | HITS-CLIP | Functional MTI (Weak) | 22473208 |
| MIRT441189 | hsa-miR-20a-5p | ARID4B   | 51742  | HITS-CLIP | Functional MTI (Weak) | 22473208 |
| MIRT441201 | hsa-miR-20a-5p | ARHGAP1  | 392    | HITS-CLIP | Functional MTI (Weak) | 22473208 |
| MIRT441213 | hsa-miR-20a-5p | ARAP2    | 116984 | HITS-CLIP | Functional MTI (Weak) | 22473208 |
| MIRT441217 | hsa-miR-20a-5p | APIG1    | 164    | HITS-CLIP | Functional MTI (Weak) | 22473208 |
| MIRT441223 | hsa-miR-20a-5p | ANKRD52  | 283373 | HITS-CLIP | Functional MTI (Weak) | 22473208 |
| MIRT441227 | hsa-miR-20a-5p | ANKRD13C | 81573  | HITS-CLIP | Functional MTI (Weak) | 22473208 |
| MIRT441232 | hsa-miR-20a-5p | ANKFY1   | 51479  | HITS-CLIP | Functional MTI (Weak) | 22473208 |
| MIRT441235 | hsa-miR-20a-5p | ALDH9A1  | 223    | HITS-CLIP | Functional MTI (Weak) | 22473208 |
| MIRT441239 | hsa-miR-20a-5p | AKTIP    | 64400  | HITS-CLIP | Functional MTI (Weak) | 22473208 |
| MIRT441293 | hsa-miR-20a-5p | ACBD5    | 91452  | HITS-CLIP | Functional MTI (Weak) | 22473208 |
| MIRT441296 | hsa-miR-20a-5p | ACAP2    | 23527  | HITS-CLIP | Functional MTI (Weak) | 22473208 |
| MIRT441312 | hsa-miR-20a-5p | ABCA1    | 19     | HITS-CLIP | Functional MTI (Weak) | 22473208 |
| MIRT441316 | hsa-miR-20a-5p | AAK1     | 22848  | HITS-CLIP | Functional MTI (Weak) | 22473208 |
| MIRT441880 | hsa-miR-20a-5p | PFKFB2   | 5208   | PAR-CLIP  | Functional MTI (Weak) | 22100165 |
| MIRT442202 | hsa-miR-20a-5p | VPS50    | 55610  | PAR-CLIP  | Functional MTI (Weak) | 22100165 |
| MIRT442551 | hsa-miR-20a-5p | SLCO5A1  | 81796  | PAR-CLIP  | Functional MTI (Weak) | 22100165 |
| MIRT442768 | hsa-miR-20a-5p | NRIP3    | 56675  | PAR-CLIP  | Functional MTI (Weak) | 22100165 |
| MIRT442802 | hsa-miR-20a-5p | CEP170   | 9859   | PAR-CLIP  | Functional MTI (Weak) | 22100165 |
| MIRT443258 | hsa-miR-20a-5p | AICF     | 29974  | PAR-CLIP  | Functional MTI (Weak) | 22100165 |
| MIRT443712 | hsa-miR-20a-5p | LLPH     | 84298  | PAR-CLIP  | Functional MTI (Weak) | 22100165 |
| MIRT444311 | hsa-miR-20a-5p | SREK1IP1 | 285672 | PAR-CLIP  | Functional MTI (Weak) | 22100165 |

|            |                |          |        |          |                       |          |
|------------|----------------|----------|--------|----------|-----------------------|----------|
| MIRT444437 | hsa-miR-20a-5p | EMC1     | 23065  | PAR-CLIP | Functional MTI (Weak) | 22100165 |
| MIRT448315 | hsa-miR-20a-5p | WNK3     | 65267  | PAR-CLIP | Functional MTI (Weak) | 22100165 |
| MIRT448365 | hsa-miR-20a-5p | TSR1     | 55720  | PAR-CLIP | Functional MTI (Weak) | 22100165 |
| MIRT448645 | hsa-miR-20a-5p | NPNT     | 255743 | PAR-CLIP | Functional MTI (Weak) | 22100165 |
| MIRT448728 | hsa-miR-20a-5p | ITGA2    | 3673   | PAR-CLIP | Functional MTI (Weak) | 22100165 |
| MIRT449173 | hsa-miR-20a-5p | SORCS2   | 57537  | PAR-CLIP | Functional MTI (Weak) | 22100165 |
| MIRT450189 | hsa-miR-20a-5p | TMEM9B   | 56674  | PAR-CLIP | Functional MTI (Weak) | 22100165 |
| MIRT450915 | hsa-miR-20a-5p | CADM2    | 253559 | PAR-CLIP | Functional MTI (Weak) | 22100165 |
| MIRT450954 | hsa-miR-20a-5p | ATAD2    | 29028  | PAR-CLIP | Functional MTI (Weak) | 22100165 |
| MIRT458293 | hsa-miR-20a-5p | FUT10    | 84750  | PAR-CLIP | Functional MTI (Weak) | 23592263 |
| MIRT463554 | hsa-miR-20a-5p | ZBTB5    | 9925   | PAR-CLIP | Functional MTI (Weak) | 23592263 |
| MIRT464847 | hsa-miR-20a-5p | RPS27A   | 6233   | PAR-CLIP | Functional MTI (Weak) | 23592263 |
| MIRT465236 | hsa-miR-20a-5p | TRIP10   | 9322   | PAR-CLIP | Functional MTI (Weak) | 23592263 |
| MIRT465539 | hsa-miR-20a-5p | PRICKLE4 | 29964  | PAR-CLIP | Functional MTI (Weak) | 23592263 |
| MIRT466455 | hsa-miR-20a-5p | TFAM     | 7019   | PAR-CLIP | Functional MTI (Weak) | 23592263 |
| MIRT467495 | hsa-miR-20a-5p | SMIM13   | 221710 | PAR-CLIP | Functional MTI (Weak) | 23592263 |
| MIRT467895 | hsa-miR-20a-5p | SLC22A23 | 63027  | PAR-CLIP | Functional MTI (Weak) | 23592263 |
| MIRT468161 | hsa-miR-20a-5p | SGPL1    | 8879   | PAR-CLIP | Functional MTI (Weak) | 23592263 |
| MIRT468185 | hsa-miR-20a-5p | SGMS1    | 259230 | PAR-CLIP | Functional MTI (Weak) | 23592263 |
| MIRT469861 | hsa-miR-20a-5p | PXK      | 54899  | PAR-CLIP | Functional MTI (Weak) | 23592263 |
| MIRT470052 | hsa-miR-20a-5p | PTGFRN   | 5738   | PAR-CLIP | Functional MTI (Weak) | 23592263 |
| MIRT471004 | hsa-miR-20a-5p | PITPNA   | 5306   | PAR-CLIP | Functional MTI (Weak) | 23592263 |
| MIRT472168 | hsa-miR-20a-5p | NIN      | 51199  | PAR-CLIP | Functional MTI (Weak) | 23592263 |
| MIRT472288 | hsa-miR-20a-5p | NFIB     | 4781   | PAR-CLIP | Functional MTI (Weak) | 23592263 |
| MIRT473167 | hsa-miR-20a-5p | MLLT1    | 4298   | PAR-CLIP | Functional MTI (Weak) | 23592263 |
| MIRT474548 | hsa-miR-20a-5p | KLF6     | 1316   | PAR-CLIP | Functional MTI (Weak) | 23592263 |
| MIRT475410 | hsa-miR-20a-5p | ICMT     | 23463  | PAR-CLIP | Functional MTI (Weak) | 23592263 |
| MIRT475477 | hsa-miR-20a-5p | HSPA8    | 3312   | PAR-CLIP | Functional MTI (Weak) | 23592263 |
| MIRT476130 | hsa-miR-20a-5p | GPR157   | 80045  | PAR-CLIP | Functional MTI (Weak) | 23592263 |
| MIRT477116 | hsa-miR-20a-5p | FAM160B1 | 57700  | PAR-CLIP | Functional MTI (Weak) | 23592263 |
| MIRT477193 | hsa-miR-20a-5p | F3       | 2152   | PAR-CLIP | Functional MTI (Weak) | 23592263 |
| MIRT477286 | hsa-miR-20a-5p | ERGIC2   | 51290  | PAR-CLIP | Functional MTI (Weak) | 23592263 |
| MIRT478722 | hsa-miR-20a-5p | CSNK1A1  | 1452   | PAR-CLIP | Functional MTI (Weak) | 23592263 |
| MIRT479040 | hsa-miR-20a-5p | COIL     | 8161   | PAR-CLIP | Functional MTI (Weak) | 23592263 |
| MIRT479064 | hsa-miR-20a-5p | CNOT6L   | 246175 | PAR-CLIP | Functional MTI (Weak) | 23592263 |
| MIRT479268 | hsa-miR-20a-5p | CHSY1    | 22856  | PAR-CLIP | Functional MTI (Weak) | 23592263 |
| MIRT480567 | hsa-miR-20a-5p | BZW1     | 9689   | PAR-CLIP | Functional MTI (Weak) | 23592263 |
| MIRT480676 | hsa-miR-20a-5p | BSCL2    | 26580  | PAR-CLIP | Functional MTI (Weak) | 23592263 |
| MIRT480786 | hsa-miR-20a-5p | BMP2     | 650    | PAR-CLIP | Functional MTI (Weak) | 23592263 |
| MIRT480953 | hsa-miR-20a-5p | BBX      | 56987  | PAR-CLIP | Functional MTI (Weak) | 23592263 |
| MIRT481882 | hsa-miR-20a-5p | ANKRD50  | 57182  | PAR-CLIP | Functional MTI (Weak) | 23592263 |
| MIRT482138 | hsa-miR-20a-5p | AKAP11   | 11215  | PAR-CLIP | Functional MTI (Weak) | 23592263 |
| MIRT482477 | hsa-miR-20a-5p | ADAR     | 103    | PAR-CLIP | Functional MTI (Weak) | 23592263 |
| MIRT484868 | hsa-miR-20a-5p | ZNF70    | 7621   | PAR-CLIP | Functional MTI (Weak) | 23592263 |
| MIRT484885 | hsa-miR-20a-5p | ZNF652   | 22834  | PAR-CLIP | Functional MTI (Weak) | 23592263 |
| MIRT484922 | hsa-miR-20a-5p | ZFYVE26  | 23503  | PAR-CLIP | Functional MTI (Weak) | 23592263 |
| MIRT485095 | hsa-miR-20a-5p | SLC30A1  | 7779   | PAR-CLIP | Functional MTI (Weak) | 23592263 |
| MIRT485193 | hsa-miR-20a-5p | PTP4A1   | 7803   | PAR-CLIP | Functional MTI (Weak) | 23592263 |
| MIRT485331 | hsa-miR-20a-5p | MYO1D    | 4642   | PAR-CLIP | Functional MTI (Weak) | 23592263 |
| MIRT485368 | hsa-miR-20a-5p | MYLIP    | 29116  | PAR-CLIP | Functional MTI (Weak) | 23592263 |
| MIRT485588 | hsa-miR-20a-5p | FOXQ1    | 94234  | PAR-CLIP | Functional MTI (Weak) | 23592263 |
| MIRT486029 | hsa-miR-20a-5p | LPAR2    | 9170   | PAR-CLIP | Functional MTI (Weak) | 23592263 |
| MIRT486757 | hsa-miR-20a-5p | CNOT4    | 4850   | PAR-CLIP | Functional MTI (Weak) | 23592263 |
| MIRT489607 | hsa-miR-20a-5p | ZDHHC20  | 253832 | PAR-CLIP | Functional MTI (Weak) | 23592263 |
| MIRT491660 | hsa-miR-20a-5p | PDHG1    | 81572  | PAR-CLIP | Functional MTI (Weak) | 23592263 |
| MIRT491807 | hsa-miR-20a-5p | ZFYVE21  | 79038  | PAR-CLIP | Functional MTI (Weak) | 23592263 |
| MIRT492011 | hsa-miR-20a-5p | UGCG     | 7357   | PAR-CLIP | Functional MTI (Weak) | 23592263 |
| MIRT492377 | hsa-miR-20a-5p | SEMA7A   | 8482   | PAR-CLIP | Functional MTI (Weak) | 23592263 |
| MIRT492786 | hsa-miR-20a-5p | PDGFB    | 5155   | PAR-CLIP | Functional MTI (Weak) | 23592263 |
| MIRT493619 | hsa-miR-20a-5p | HMGCB3   | 3149   | PAR-CLIP | Functional MTI (Weak) | 23592263 |
| MIRT494427 | hsa-miR-20a-5p | BTG2     | 7832   | PAR-CLIP | Functional MTI (Weak) | 23592263 |
| MIRT496064 | hsa-miR-20a-5p | MORC1    | 27136  | PAR-CLIP | Functional MTI (Weak) | 22291592 |
| MIRT500724 | hsa-miR-20a-5p | TRIM37   | 4591   | PAR-CLIP | Functional MTI (Weak) | 24398324 |
| MIRT502008 | hsa-miR-20a-5p | MAP7     | 9053   | PAR-CLIP | Functional MTI (Weak) | 24398324 |
| MIRT503213 | hsa-miR-20a-5p | ACER2    | 340485 | PAR-CLIP | Functional MTI (Weak) | 24398324 |
| MIRT503562 | hsa-miR-20a-5p | MDM2     | 4193   | PAR-CLIP | Functional MTI (Weak) | 23446348 |
| MIRT503610 | hsa-miR-20a-5p | ZNF780A  | 284323 | PAR-CLIP | Functional MTI (Weak) | 23446348 |
| MIRT503829 | hsa-miR-20a-5p | TMEM242  | 729515 | PAR-CLIP | Functional MTI (Weak) | 23446348 |
| MIRT503967 | hsa-miR-20a-5p | ZNF180   | 7733   | PAR-CLIP | Functional MTI (Weak) | 23446348 |
| MIRT504566 | hsa-miR-20a-5p | ZNF417   | 147687 | PAR-CLIP | Functional MTI (Weak) | 23446348 |
| MIRT504641 | hsa-miR-20a-5p | MFSD8    | 256471 | PAR-CLIP | Functional MTI (Weak) | 23446348 |
| MIRT505060 | hsa-miR-20a-5p | ZNF202   | 7753   | PAR-CLIP | Functional MTI (Weak) | 23446348 |
| MIRT505866 | hsa-miR-20a-5p | POLR1B   | 84172  | PAR-CLIP | Functional MTI (Weak) | 23446348 |
| MIRT506282 | hsa-miR-20a-5p | PDPK1    | 5170   | PAR-CLIP | Functional MTI (Weak) | 23446348 |
| MIRT506378 | hsa-miR-20a-5p | NUFIP2   | 57532  | PAR-CLIP | Functional MTI (Weak) | 23446348 |
| MIRT506458 | hsa-miR-20a-5p | NACC2    | 138151 | PAR-CLIP | Functional MTI (Weak) | 23446348 |
| MIRT506547 | hsa-miR-20a-5p | MORF4L1  | 10933  | PAR-CLIP | Functional MTI (Weak) | 23446348 |
| MIRT506622 | hsa-miR-20a-5p | MARCH6   | 10299  | PAR-CLIP | Functional MTI (Weak) | 23446348 |
| MIRT506685 | hsa-miR-20a-5p | LZIC     | 84328  | PAR-CLIP | Functional MTI (Weak) | 23446348 |
| MIRT506873 | hsa-miR-20a-5p | KIAA1147 | 57189  | PAR-CLIP | Functional MTI (Weak) | 23446348 |
| MIRT506887 | hsa-miR-20a-5p | PCLAF    | 9768   | PAR-CLIP | Functional MTI (Weak) | 23446348 |
| MIRT506991 | hsa-miR-20a-5p | HNRNPR   | 10236  | PAR-CLIP | Functional MTI (Weak) | 23446348 |
| MIRT507203 | hsa-miR-20a-5p | EZD9     | 8326   | PAR-CLIP | Functional MTI (Weak) | 23446348 |
| MIRT507440 | hsa-miR-20a-5p | ELK4     | 2005   | PAR-CLIP | Functional MTI (Weak) | 23446348 |
| MIRT507947 | hsa-miR-20a-5p | BTF3L4   | 91408  | PAR-CLIP | Functional MTI (Weak) | 23446348 |
| MIRT508576 | hsa-miR-20a-5p | CEP72    | 55722  | PAR-CLIP | Functional MTI (Weak) | 23446348 |
| MIRT508745 | hsa-miR-20a-5p | ZNF682   | 91120  | PAR-CLIP | Functional MTI (Weak) | 23446348 |
| MIRT508837 | hsa-miR-20a-5p | GPR155   | 151556 | PAR-CLIP | Functional MTI (Weak) | 23446348 |
| MIRT509130 | hsa-miR-20a-5p | BMP8B    | 656    | PAR-CLIP | Functional MTI (Weak) | 23446348 |
| MIRT509745 | hsa-miR-20a-5p | EFCAB11  | 90141  | PAR-CLIP | Functional MTI (Weak) | 23446348 |
| MIRT510029 | hsa-miR-20a-5p | CRISPLD2 | 83716  | PAR-CLIP | Functional MTI (Weak) | 23446348 |
| MIRT511267 | hsa-miR-20a-5p | KLHL36   | 79786  | PAR-CLIP | Functional MTI (Weak) | 23446348 |
| MIRT511320 | hsa-miR-20a-5p | KIAA1551 | 55196  | PAR-CLIP | Functional MTI (Weak) | 23446348 |
| MIRT511556 | hsa-miR-20a-5p | HMGCB1   | 3146   | PAR-CLIP | Functional MTI (Weak) | 23446348 |
| MIRT512322 | hsa-miR-20a-5p | ACTR2    | 10097  | PAR-CLIP | Functional MTI (Weak) | 23446348 |
| MIRT513467 | hsa-miR-20a-5p | NARS     | 4677   | PAR-CLIP | Functional MTI (Weak) | 23446348 |
| MIRT513709 | hsa-miR-20a-5p | RBM20    | 282996 | PAR-CLIP | Functional MTI (Weak) | 23446348 |
| MIRT513751 | hsa-miR-20a-5p | PKNOX1   | 5316   | PAR-CLIP | Functional MTI (Weak) | 23446348 |
| MIRT514101 | hsa-miR-20a-5p | EPS15L1  | 58513  | PAR-CLIP | Functional MTI (Weak) | 23446348 |
| MIRT514137 | hsa-miR-20a-5p | SERF2    | 10169  | PAR-CLIP | Functional MTI (Weak) | 23446348 |
| MIRT514320 | hsa-miR-20a-5p | FXYD5    | 53827  | PAR-CLIP | Functional MTI (Weak) | 23446348 |
| MIRT514998 | hsa-miR-20a-5p | DNTTIP2  | 30836  | PAR-CLIP | Functional MTI (Weak) | 23446348 |
| MIRT515205 | hsa-miR-20a-5p | CRCP     | 27297  | PAR-CLIP | Functional MTI (Weak) | 23446348 |
| MIRT515575 | hsa-miR-20a-5p | TMEM134  | 80194  | PAR-CLIP | Functional MTI (Weak) | 23446348 |
| MIRT516060 | hsa-miR-20a-5p | MED18    | 54797  | PAR-CLIP | Functional MTI (Weak) | 23446348 |

|            |                |           |        |                     |                       |          |
|------------|----------------|-----------|--------|---------------------|-----------------------|----------|
| MIRT516559 | hsa-miR-20a-5p | MIXL1     | 83881  | PAR-CLIP            | Functional MTI (Weak) | 23446348 |
| MIRT516799 | hsa-miR-20a-5p | CAVIN1    | 284119 | PAR-CLIP            | Functional MTI (Weak) | 23446348 |
| MIRT517021 | hsa-miR-20a-5p | COX19     | 90639  | PAR-CLIP            | Functional MTI (Weak) | 23446348 |
| MIRT517187 | hsa-miR-20a-5p | SLC28A1   | 9154   | PAR-CLIP            | Functional MTI (Weak) | 23446348 |
| MIRT517260 | hsa-miR-20a-5p | PRIMI     | 5557   | PAR-CLIP            | Functional MTI (Weak) | 23446348 |
| MIRT518317 | hsa-miR-20a-5p | ZNF514    | 84874  | PAR-CLIP            | Functional MTI (Weak) | 23446348 |
| MIRT518468 | hsa-miR-20a-5p | KIF6      | 221458 | PAR-CLIP            | Functional MTI (Weak) | 23446348 |
| MIRT518699 | hsa-miR-20a-5p | KCNMB1    | 3779   | PAR-CLIP            | Functional MTI (Weak) | 23446348 |
| MIRT518804 | hsa-miR-20a-5p | MED16     | 10025  | PAR-CLIP            | Functional MTI (Weak) | 23446348 |
| MIRT518863 | hsa-miR-20a-5p | NEK8      | 284086 | PAR-CLIP            | Functional MTI (Weak) | 23446348 |
| MIRT518972 | hsa-miR-20a-5p | GRK7      | 131890 | PAR-CLIP            | Functional MTI (Weak) | 23446348 |
| MIRT519432 | hsa-miR-20a-5p | KCNA7     | 3743   | PAR-CLIP            | Functional MTI (Weak) | 23446348 |
| MIRT519548 | hsa-miR-20a-5p | TMEM38A   | 79041  | PAR-CLIP            | Functional MTI (Weak) | 23446348 |
| MIRT520082 | hsa-miR-20a-5p | YIPF4     | 84272  | PAR-CLIP            | Functional MTI (Weak) | 23446348 |
| MIRT520156 | hsa-miR-20a-5p | WSB1      | 26118  | PAR-CLIP            | Functional MTI (Weak) | 23446348 |
| MIRT521010 | hsa-miR-20a-5p | SOC5      | 9655   | PAR-CLIP            | Functional MTI (Weak) | 23446348 |
| MIRT521304 | hsa-miR-20a-5p | RRAGD     | 58528  | PAR-CLIP            | Functional MTI (Weak) | 23446348 |
| MIRT521549 | hsa-miR-20a-5p | QSOX1     | 5768   | PAR-CLIP            | Functional MTI (Weak) | 23446348 |
| MIRT522172 | hsa-miR-20a-5p | NR2F6     | 2063   | PAR-CLIP            | Functional MTI (Weak) | 23446348 |
| MIRT522505 | hsa-miR-20a-5p | MFN1      | 55669  | PAR-CLIP            | Functional MTI (Weak) | 23446348 |
| MIRT523083 | hsa-miR-20a-5p | HYPK      | 25764  | PAR-CLIP            | Functional MTI (Weak) | 23446348 |
| MIRT523654 | hsa-miR-20a-5p | FOXP1     | 221937 | PAR-CLIP            | Functional MTI (Weak) | 23446348 |
| MIRT524083 | hsa-miR-20a-5p | DNAJC10   | 54431  | PAR-CLIP            | Functional MTI (Weak) | 23446348 |
| MIRT524251 | hsa-miR-20a-5p | DCTN6     | 10671  | PAR-CLIP            | Functional MTI (Weak) | 23446348 |
| MIRT524295 | hsa-miR-20a-5p | CYCS      | 54205  | PAR-CLIP            | Functional MTI (Weak) | 23446348 |
| MIRT524457 | hsa-miR-20a-5p | CNKSR3    | 154043 | PAR-CLIP            | Functional MTI (Weak) | 23446348 |
| MIRT524706 | hsa-miR-20a-5p | BTG3      | 10950  | PAR-CLIP            | Functional MTI (Weak) | 23446348 |
| MIRT524984 | hsa-miR-20a-5p | AGO3      | 192669 | PAR-CLIP            | Functional MTI (Weak) | 23446348 |
| MIRT525204 | hsa-miR-20a-5p | ZNF93     | 81931  | PAR-CLIP            | Functional MTI (Weak) | 22012620 |
| MIRT525488 | hsa-miR-20a-5p | TPK1      | 27010  | PAR-CLIP            | Functional MTI (Weak) | 22012620 |
| MIRT526639 | hsa-miR-20a-5p | NME6      | 10201  | PAR-CLIP            | Functional MTI (Weak) | 22012620 |
| MIRT527206 | hsa-miR-20a-5p | XIRP2     | 129446 | PAR-CLIP            | Functional MTI (Weak) | 22012620 |
| MIRT527259 | hsa-miR-20a-5p | TMEM196   | 256130 | PAR-CLIP            | Functional MTI (Weak) | 22012620 |
| MIRT527474 | hsa-miR-20a-5p | CLEC12B   | 387837 | PAR-CLIP            | Functional MTI (Weak) | 22012620 |
| MIRT528374 | hsa-miR-20a-5p | ZMYM1     | 79830  | PAR-CLIP            | Functional MTI (Weak) | 22012620 |
| MIRT530003 | hsa-miR-20a-5p | TNFAIP8L1 | 126282 | PAR-CLIP            | Functional MTI (Weak) | 22012620 |
| MIRT530591 | hsa-miR-20a-5p | ABHD15    | 116236 | PAR-CLIP            | Functional MTI (Weak) | 22012620 |
| MIRT530989 | hsa-miR-20a-5p | EXO5      | 64789  | PAR-CLIP            | Functional MTI (Weak) | 22012620 |
| MIRT531480 | hsa-miR-20a-5p | TNFRSF10B | 8795   | PAR-CLIP            | Functional MTI (Weak) | 22012620 |
| MIRT531779 | hsa-miR-20a-5p | TXK       | 7294   | PAR-CLIP            | Functional MTI (Weak) | 22012620 |
| MIRT531839 | hsa-miR-20a-5p | MTPAP     | 55149  | PAR-CLIP            | Functional MTI (Weak) | 22012620 |
| MIRT532053 | hsa-miR-20a-5p | FHDC1     | 85462  | PAR-CLIP            | Functional MTI (Weak) | 22012620 |
| MIRT532618 | hsa-miR-20a-5p | SPTLC2    | 9517   | PAR-CLIP            | Functional MTI (Weak) | 22012620 |
| MIRT532922 | hsa-miR-20a-5p | ZNF385A   | 25946  | PAR-CLIP            | Functional MTI (Weak) | 22012620 |
| MIRT533881 | hsa-miR-20a-5p | TBL1XR1   | 79718  | PAR-CLIP            | Functional MTI (Weak) | 22012620 |
| MIRT534008 | hsa-miR-20a-5p | KMT5B     | 51111  | PAR-CLIP            | Functional MTI (Weak) | 22012620 |
| MIRT534573 | hsa-miR-20a-5p | RPS6KA5   | 9252   | PAR-CLIP            | Functional MTI (Weak) | 22012620 |
| MIRT534631 | hsa-miR-20a-5p | RNASEH1   | 246243 | PAR-CLIP            | Functional MTI (Weak) | 22012620 |
| MIRT535033 | hsa-miR-20a-5p | PRKAR1A   | 5573   | PAR-CLIP            | Functional MTI (Weak) | 22012620 |
| MIRT536446 | hsa-miR-20a-5p | KMT2B     | 9757   | PAR-CLIP            | Functional MTI (Weak) | 22012620 |
| MIRT536503 | hsa-miR-20a-5p | TMEM131L  | 23240  | PAR-CLIP            | Functional MTI (Weak) | 22012620 |
| MIRT536542 | hsa-miR-20a-5p | KCNJ8     | 3764   | PAR-CLIP            | Functional MTI (Weak) | 22012620 |
| MIRT537450 | hsa-miR-20a-5p | FBXL7     | 23194  | PAR-CLIP            | Functional MTI (Weak) | 22012620 |
| MIRT537742 | hsa-miR-20a-5p | ELAVL2    | 1993   | PAR-CLIP            | Functional MTI (Weak) | 22012620 |
| MIRT538040 | hsa-miR-20a-5p | DNAJB6    | 10049  | PAR-CLIP            | Functional MTI (Weak) | 22012620 |
| MIRT538070 | hsa-miR-20a-5p | DIAPH2    | 1730   | PAR-CLIP            | Functional MTI (Weak) | 22012620 |
| MIRT539427 | hsa-miR-20a-5p | ADAT2     | 134637 | PAR-CLIP            | Functional MTI (Weak) | 22012620 |
| MIRT540278 | hsa-miR-20a-5p | FAM89A    | 375061 | PAR-CLIP            | Functional MTI (Weak) | 21572407 |
| MIRT541093 | hsa-miR-20a-5p | RLIM      | 51132  | PAR-CLIP            | Functional MTI (Weak) | 21572407 |
| MIRT542063 | hsa-miR-20a-5p | SLC25A46  | 91137  | PAR-CLIP            | Functional MTI (Weak) | 21572407 |
| MIRT542145 | hsa-miR-20a-5p | DIS3L     | 115752 | PAR-CLIP            | Functional MTI (Weak) | 21572407 |
| MIRT542271 | hsa-miR-20a-5p | HSPA4L    | 22824  | PAR-CLIP            | Functional MTI (Weak) | 21572407 |
| MIRT543188 | hsa-miR-20a-5p | FICD      | 11153  | PAR-CLIP            | Functional MTI (Weak) | 21572407 |
| MIRT543511 | hsa-miR-20a-5p | PLS1      | 5357   | PAR-CLIP            | Functional MTI (Weak) | 21572407 |
| MIRT543583 | hsa-miR-20a-5p | RPF2      | 84154  | PAR-CLIP            | Functional MTI (Weak) | 21572407 |
| MIRT544632 | hsa-miR-20a-5p | CSDE1     | 7812   | PAR-CLIP            | Functional MTI (Weak) | 21572407 |
| MIRT545206 | hsa-miR-20a-5p | HIST1H2BD | 3017   | PAR-CLIP            | Functional MTI (Weak) | 21572407 |
| MIRT546299 | hsa-miR-20a-5p | TMEM200C  | 645369 | PAR-CLIP            | Functional MTI (Weak) | 21572407 |
| MIRT546694 | hsa-miR-20a-5p | RORA      | 6095   | PAR-CLIP            | Functional MTI (Weak) | 21572407 |
| MIRT546827 | hsa-miR-20a-5p | RAP2C     | 57826  | PAR-CLIP            | Functional MTI (Weak) | 21572407 |
| MIRT547085 | hsa-miR-20a-5p | PLRG1     | 5356   | PAR-CLIP            | Functional MTI (Weak) | 21572407 |
| MIRT548324 | hsa-miR-20a-5p | EPHA4     | 2043   | PAR-CLIP            | Functional MTI (Weak) | 21572407 |
| MIRT548396 | hsa-miR-20a-5p | ENPP5     | 59084  | PAR-CLIP            | Functional MTI (Weak) | 21572407 |
| MIRT548822 | hsa-miR-20a-5p | CLIC4     | 25932  | PAR-CLIP            | Functional MTI (Weak) | 21572407 |
| MIRT548867 | hsa-miR-20a-5p | CERCAM    | 51148  | PAR-CLIP//HITS-CLIP | Functional MTI (Weak) | 21572407 |
| MIRT549113 | hsa-miR-20a-5p | C16orf70  | 80262  | PAR-CLIP            | Functional MTI (Weak) | 21572407 |
| MIRT549826 | hsa-miR-20a-5p | LUZP2     | 338645 | PAR-CLIP            | Functional MTI (Weak) | 21572407 |
| MIRT550097 | hsa-miR-20a-5p | TRAPP2    | 6399   | PAR-CLIP            | Functional MTI (Weak) | 21572407 |
| MIRT550308 | hsa-miR-20a-5p | ZNF681    | 148213 | PAR-CLIP            | Functional MTI (Weak) | 21572407 |
| MIRT551127 | hsa-miR-20a-5p | ZNF107    | 51427  | PAR-CLIP            | Functional MTI (Weak) | 21572407 |
| MIRT551748 | hsa-miR-20a-5p | FMNL2     | 114793 | PAR-CLIP            | Functional MTI (Weak) | 21572407 |
| MIRT552208 | hsa-miR-20a-5p | F2RL3     | 9002   | PAR-CLIP            | Functional MTI (Weak) | 21572407 |
| MIRT552689 | hsa-miR-20a-5p | YWHAZ     | 7534   | PAR-CLIP            | Functional MTI (Weak) | 21572407 |
| MIRT552869 | hsa-miR-20a-5p | WIPF2     | 147179 | PAR-CLIP            | Functional MTI (Weak) | 21572407 |
| MIRT552899 | hsa-miR-20a-5p | WASL      | 8976   | PAR-CLIP            | Functional MTI (Weak) | 21572407 |
| MIRT553034 | hsa-miR-20a-5p | USP48     | 84196  | PAR-CLIP//HITS-CLIP | Functional MTI (Weak) | 21572407 |
| MIRT553579 | hsa-miR-20a-5p | TMEM100   | 55273  | PAR-CLIP            | Functional MTI (Weak) | 21572407 |
| MIRT553705 | hsa-miR-20a-5p | TCF7L2    | 6934   | PAR-CLIP            | Functional MTI (Weak) | 21572407 |
| MIRT554416 | hsa-miR-20a-5p | SCD       | 6319   | PAR-CLIP            | Functional MTI (Weak) | 21572407 |
| MIRT554485 | hsa-miR-20a-5p | SAMD12    | 401474 | PAR-CLIP            | Functional MTI (Weak) | 21572407 |
| MIRT554558 | hsa-miR-20a-5p | RRN3      | 54700  | PAR-CLIP            | Functional MTI (Weak) | 21572407 |
| MIRT554751 | hsa-miR-20a-5p | RHOC      | 389    | PAR-CLIP            | Functional MTI (Weak) | 21572407 |
| MIRT555468 | hsa-miR-20a-5p | POLR3A    | 11128  | PAR-CLIP            | Functional MTI (Weak) | 21572407 |
| MIRT556188 | hsa-miR-20a-5p | MCC       | 4163   | PAR-CLIP            | Functional MTI (Weak) | 21572407 |
| MIRT556596 | hsa-miR-20a-5p | LEPROT    | 54741  | PAR-CLIP            | Functional MTI (Weak) | 21572407 |
| MIRT556908 | hsa-miR-20a-5p | ISOC1     | 51015  | PAR-CLIP            | Functional MTI (Weak) | 21572407 |
| MIRT557037 | hsa-miR-20a-5p | HOXD11    | 3237   | PAR-CLIP            | Functional MTI (Weak) | 21572407 |
| MIRT557596 | hsa-miR-20a-5p | GNPTAB    | 79158  | PAR-CLIP            | Functional MTI (Weak) | 21572407 |
| MIRT557768 | hsa-miR-20a-5p | FRS2      | 10818  | PAR-CLIP            | Functional MTI (Weak) | 21572407 |
| MIRT557892 | hsa-miR-20a-5p | FEM1B     | 10116  | PAR-CLIP            | Functional MTI (Weak) | 21572407 |
| MIRT558341 | hsa-miR-20a-5p | DNAJC28   | 54943  | PAR-CLIP            | Functional MTI (Weak) | 21572407 |
| MIRT558939 | hsa-miR-20a-5p | CBX1      | 10951  | PAR-CLIP            | Functional MTI (Weak) | 21572407 |
| MIRT559442 | hsa-miR-20a-5p | ARSJ      | 79642  | PAR-CLIP            | Functional MTI (Weak) | 21572407 |
| MIRT561247 | hsa-miR-20a-5p | ZNF354B   | 117608 | PAR-CLIP            | Functional MTI (Weak) | 20371350 |
| MIRT561650 | hsa-miR-20a-5p | RUNX3     | 864    | PAR-CLIP            | Functional MTI (Weak) | 20371350 |

|            |                |                |           |           |                       |          |
|------------|----------------|----------------|-----------|-----------|-----------------------|----------|
| MIRT562219 | hsa-miR-20a-5p | HMGB2          | 3148      | PAR-CLIP  | Functional MTI (Weak) | 20371350 |
| MIRT562567 | hsa-miR-20a-5p | CCDC71L        | 168455    | PAR-CLIP  | Functional MTI (Weak) | 20371350 |
| MIRT562969 | hsa-miR-20a-5p | LRPAP1         | 4043      | PAR-CLIP  | Functional MTI (Weak) | 20371350 |
| MIRT563383 | hsa-miR-20a-5p | DSPP           | 1834      | PAR-CLIP  | Functional MTI (Weak) | 20371350 |
| MIRT564687 | hsa-miR-20a-5p | ZNF35          | 7584      | PAR-CLIP  | Functional MTI (Weak) | 20371350 |
| MIRT565704 | hsa-miR-20a-5p | SESN3          | 143686    | PAR-CLIP  | Functional MTI (Weak) | 20371350 |
| MIRT566145 | hsa-miR-20a-5p | RACGAP1        | 29127     | PAR-CLIP  | Functional MTI (Weak) | 20371350 |
| MIRT566573 | hsa-miR-20a-5p | OTUD4          | 54726     | PAR-CLIP  | Functional MTI (Weak) | 20371350 |
| MIRT566882 | hsa-miR-20a-5p | LRP12          | 29967     | PAR-CLIP  | Functional MTI (Weak) | 20371350 |
| MIRT567059 | hsa-miR-20a-5p | KCNB1          | 3745      | PAR-CLIP  | Functional MTI (Weak) | 20371350 |
| MIRT567117 | hsa-miR-20a-5p | ITGB1          | 3688      | PAR-CLIP  | Functional MTI (Weak) | 20371350 |
| MIRT567547 | hsa-miR-20a-5p | FGFR1OP        | 11116     | PAR-CLIP  | Functional MTI (Weak) | 20371350 |
| MIRT567689 | hsa-miR-20a-5p | EIF4A2         | 1974      | PAR-CLIP  | Functional MTI (Weak) | 20371350 |
| MIRT567850 | hsa-miR-20a-5p | DCAF8          | 50717     | PAR-CLIP  | Functional MTI (Weak) | 20371350 |
| MIRT567996 | hsa-miR-20a-5p | COX6B1         | 1340      | PAR-CLIP  | Functional MTI (Weak) | 20371350 |
| MIRT568184 | hsa-miR-20a-5p | CCDC6          | 8030      | PAR-CLIP  | Functional MTI (Weak) | 20371350 |
| MIRT568274 | hsa-miR-20a-5p | BICD2          | 23299     | PAR-CLIP  | Functional MTI (Weak) | 20371350 |
| MIRT571019 | hsa-miR-20a-5p | CKAP2          | 26586     | PAR-CLIP  | Functional MTI (Weak) | 20371350 |
| MIRT571682 | hsa-miR-20a-5p | RRAS2          | 22800     | PAR-CLIP  | Functional MTI (Weak) | 20371350 |
| MIRT571698 | hsa-miR-20a-5p | RPRD2          | 23248     | PAR-CLIP  | Functional MTI (Weak) | 20371350 |
| MIRT571728 | hsa-miR-20a-5p | RPL17-C18orf32 | 100526842 | PAR-CLIP  | Functional MTI (Weak) | 20371350 |
| MIRT571863 | hsa-miR-20a-5p | NKIRAS1        | 28512     | PAR-CLIP  | Functional MTI (Weak) | 20371350 |
| MIRT572213 | hsa-miR-20a-5p | C18orf32       | 497661    | PAR-CLIP  | Functional MTI (Weak) | 20371350 |
| MIRT572680 | hsa-miR-20a-5p | AGMAT          | 79814     | PAR-CLIP  | Functional MTI (Weak) | 20371350 |
| MIRT573920 | hsa-miR-20a-5p | SNAP47         | 116841    | PAR-CLIP  | Functional MTI (Weak) | 20371350 |
| MIRT608372 | hsa-miR-20a-5p | PIWIL2         | 55124     | HITS-CLIP | Functional MTI (Weak) | 24906430 |
| MIRT608752 | hsa-miR-20a-5p | MYH9           | 4627      | HITS-CLIP | Functional MTI (Weak) | 24906430 |
| MIRT608978 | hsa-miR-20a-5p | PRKCB          | 5579      | HITS-CLIP | Functional MTI (Weak) | 24906430 |
| MIRT611003 | hsa-miR-20a-5p | BRI3BP         | 140707    | HITS-CLIP | Functional MTI (Weak) | 23824327 |
| MIRT611840 | hsa-miR-20a-5p | FEM1A          | 55527     | HITS-CLIP | Functional MTI (Weak) | 23824327 |
| MIRT612615 | hsa-miR-20a-5p | RANGAP1        | 5905      | HITS-CLIP | Functional MTI (Weak) | 23824327 |
| MIRT614267 | hsa-miR-20a-5p | WDR53          | 348793    | HITS-CLIP | Functional MTI (Weak) | 23824327 |
| MIRT615180 | hsa-miR-20a-5p | SPIB           | 6689      | HITS-CLIP | Functional MTI (Weak) | 23824327 |
| MIRT615451 | hsa-miR-20a-5p | FAXC           | 84553     | HITS-CLIP | Functional MTI (Weak) | 23824327 |
| MIRT616176 | hsa-miR-20a-5p | ELOC           | 6921      | HITS-CLIP | Functional MTI (Weak) | 23824327 |
| MIRT619845 | hsa-miR-20a-5p | POLM           | 27434     | HITS-CLIP | Functional MTI (Weak) | 23824327 |
| MIRT620981 | hsa-miR-20a-5p | TM4SF5         | 9032      | HITS-CLIP | Functional MTI (Weak) | 23824327 |
| MIRT624428 | hsa-miR-20a-5p | CBX8           | 57332     | HITS-CLIP | Functional MTI (Weak) | 23824327 |
| MIRT625084 | hsa-miR-20a-5p | C15orf41       | 84529     | HITS-CLIP | Functional MTI (Weak) | 23824327 |
| MIRT626042 | hsa-miR-20a-5p | ATAT1          | 79969     | HITS-CLIP | Functional MTI (Weak) | 23824327 |
| MIRT626225 | hsa-miR-20a-5p | PNRC1          | 10957     | HITS-CLIP | Functional MTI (Weak) | 23824327 |
| MIRT626934 | hsa-miR-20a-5p | HIST1H2BG      | 8339      | HITS-CLIP | Functional MTI (Weak) | 23824327 |
| MIRT628569 | hsa-miR-20a-5p | MELK           | 9833      | HITS-CLIP | Functional MTI (Weak) | 23824327 |
| MIRT633126 | hsa-miR-20a-5p | CBX5           | 23468     | HITS-CLIP | Functional MTI (Weak) | 23824327 |
| MIRT634102 | hsa-miR-20a-5p | APOH           | 350       | HITS-CLIP | Functional MTI (Weak) | 23824327 |
| MIRT634459 | hsa-miR-20a-5p | PAK6           | 56924     | HITS-CLIP | Functional MTI (Weak) | 23824327 |
| MIRT634650 | hsa-miR-20a-5p | HIP1           | 3092      | HITS-CLIP | Functional MTI (Weak) | 23824327 |
| MIRT634959 | hsa-miR-20a-5p | GTF2H2C        | 728340    | HITS-CLIP | Functional MTI (Weak) | 23824327 |
| MIRT640014 | hsa-miR-20a-5p | OSTM1          | 28962     | HITS-CLIP | Functional MTI (Weak) | 23824327 |
| MIRT641710 | hsa-miR-20a-5p | SPCS1          | 28972     | HITS-CLIP | Functional MTI (Weak) | 23824327 |
| MIRT645219 | hsa-miR-20a-5p | POLR3F         | 10621     | HITS-CLIP | Functional MTI (Weak) | 23824327 |
| MIRT662411 | hsa-miR-20a-5p | ICAIL          | 130026    | HITS-CLIP | Functional MTI (Weak) | 23824327 |
| MIRT664232 | hsa-miR-20a-5p | LSM3           | 27258     | HITS-CLIP | Functional MTI (Weak) | 23824327 |
| MIRT664398 | hsa-miR-20a-5p | CYB5A          | 1528      | HITS-CLIP | Functional MTI (Weak) | 23824327 |
| MIRT664798 | hsa-miR-20a-5p | LIAS           | 11019     | HITS-CLIP | Functional MTI (Weak) | 23824327 |
| MIRT673138 | hsa-miR-20a-5p | MFS2A          | 84879     | HITS-CLIP | Functional MTI (Weak) | 23824327 |
| MIRT675843 | hsa-miR-20a-5p | DHODH          | 1723      | HITS-CLIP | Functional MTI (Weak) | 23824327 |
| MIRT677159 | hsa-miR-20a-5p | DEGS1          | 8560      | HITS-CLIP | Functional MTI (Weak) | 23824327 |
| MIRT677265 | hsa-miR-20a-5p | C15orf40       | 123207    | HITS-CLIP | Functional MTI (Weak) | 23824327 |
| MIRT678752 | hsa-miR-20a-5p | SRCAP          | 10847     | HITS-CLIP | Functional MTI (Weak) | 23824327 |
| MIRT680378 | hsa-miR-20a-5p | GATAD1         | 57798     | HITS-CLIP | Functional MTI (Weak) | 23824327 |
| MIRT680705 | hsa-miR-20a-5p | ZNF785         | 146540    | HITS-CLIP | Functional MTI (Weak) | 23706177 |
| MIRT680783 | hsa-miR-20a-5p | WDR73          | 84942     | HITS-CLIP | Functional MTI (Weak) | 23706177 |
| MIRT681415 | hsa-miR-20a-5p | RMND1          | 55005     | HITS-CLIP | Functional MTI (Weak) | 23706177 |
| MIRT681709 | hsa-miR-20a-5p | ABI2           | 10152     | HITS-CLIP | Functional MTI (Weak) | 23706177 |
| MIRT681845 | hsa-miR-20a-5p | N4BP2L2        | 10443     | HITS-CLIP | Functional MTI (Weak) | 23706177 |
| MIRT682336 | hsa-miR-20a-5p | RAB42          | 115273    | HITS-CLIP | Functional MTI (Weak) | 23706177 |
| MIRT683334 | hsa-miR-20a-5p | FAAP24         | 91442     | HITS-CLIP | Functional MTI (Weak) | 23313552 |
| MIRT683404 | hsa-miR-20a-5p | ESR2           | 2100      | HITS-CLIP | Functional MTI (Weak) | 23313552 |
| MIRT683508 | hsa-miR-20a-5p | ZNF7           | 7553      | HITS-CLIP | Functional MTI (Weak) | 23313552 |
| MIRT683540 | hsa-miR-20a-5p | C11orf54       | 28970     | HITS-CLIP | Functional MTI (Weak) | 23313552 |
| MIRT683891 | hsa-miR-20a-5p | OClAD1         | 54940     | HITS-CLIP | Functional MTI (Weak) | 23313552 |
| MIRT683964 | hsa-miR-20a-5p | MYLK3          | 91807     | HITS-CLIP | Functional MTI (Weak) | 23313552 |
| MIRT683993 | hsa-miR-20a-5p | QRFP           | 84109     | HITS-CLIP | Functional MTI (Weak) | 23313552 |
| MIRT684096 | hsa-miR-20a-5p | TLR7           | 51284     | HITS-CLIP | Functional MTI (Weak) | 23313552 |
| MIRT684149 | hsa-miR-20a-5p | CEP104         | 9731      | HITS-CLIP | Functional MTI (Weak) | 23313552 |
| MIRT684374 | hsa-miR-20a-5p | BCAS4          | 55653     | HITS-CLIP | Functional MTI (Weak) | 23313552 |
| MIRT684590 | hsa-miR-20a-5p | ORA2           | 80228     | HITS-CLIP | Functional MTI (Weak) | 23313552 |
| MIRT684633 | hsa-miR-20a-5p | GTF2IRD2B      | 389524    | HITS-CLIP | Functional MTI (Weak) | 23313552 |
| MIRT684664 | hsa-miR-20a-5p | PDE4C          | 5143      | HITS-CLIP | Functional MTI (Weak) | 23313552 |
| MIRT684729 | hsa-miR-20a-5p | LRRD1          | 401387    | HITS-CLIP | Functional MTI (Weak) | 23313552 |
| MIRT684758 | hsa-miR-20a-5p | DNAJB13        | 374407    | HITS-CLIP | Functional MTI (Weak) | 23313552 |
| MIRT684803 | hsa-miR-20a-5p | MYO1F          | 4542      | HITS-CLIP | Functional MTI (Weak) | 23313552 |
| MIRT684935 | hsa-miR-20a-5p | CD28           | 940       | HITS-CLIP | Functional MTI (Weak) | 23313552 |
| MIRT685211 | hsa-miR-20a-5p | DCTN5          | 84516     | HITS-CLIP | Functional MTI (Weak) | 23313552 |
| MIRT685264 | hsa-miR-20a-5p | F2RL1          | 2150      | HITS-CLIP | Functional MTI (Weak) | 23313552 |
| MIRT685332 | hsa-miR-20a-5p | ASB16          | 92591     | HITS-CLIP | Functional MTI (Weak) | 23313552 |
| MIRT685367 | hsa-miR-20a-5p | CCL5           | 6352      | HITS-CLIP | Functional MTI (Weak) | 23313552 |
| MIRT685535 | hsa-miR-20a-5p | MSH3           | 4437      | HITS-CLIP | Functional MTI (Weak) | 23313552 |
| MIRT685594 | hsa-miR-20a-5p | KCNK6          | 9424      | HITS-CLIP | Functional MTI (Weak) | 23313552 |
| MIRT685725 | hsa-miR-20a-5p | BHMT2          | 23743     | HITS-CLIP | Functional MTI (Weak) | 23313552 |
| MIRT685758 | hsa-miR-20a-5p | C12orf65       | 91574     | HITS-CLIP | Functional MTI (Weak) | 23313552 |
| MIRT685799 | hsa-miR-20a-5p | ZNF426         | 79088     | HITS-CLIP | Functional MTI (Weak) | 23313552 |
| MIRT685971 | hsa-miR-20a-5p | PTGIS          | 5740      | HITS-CLIP | Functional MTI (Weak) | 23313552 |
| MIRT686122 | hsa-miR-20a-5p | TNIP3          | 79931     | HITS-CLIP | Functional MTI (Weak) | 23313552 |
| MIRT686172 | hsa-miR-20a-5p | HS3ST1         | 9957      | HITS-CLIP | Functional MTI (Weak) | 23313552 |
| MIRT686299 | hsa-miR-20a-5p | WWC1           | 23286     | HITS-CLIP | Functional MTI (Weak) | 23313552 |
| MIRT686337 | hsa-miR-20a-5p | VPS53          | 55275     | HITS-CLIP | Functional MTI (Weak) | 23313552 |
| MIRT686460 | hsa-miR-20a-5p | LINC00598      | 646982    | HITS-CLIP | Functional MTI (Weak) | 23313552 |
| MIRT686504 | hsa-miR-20a-5p | TRIOBP         | 11078     | HITS-CLIP | Functional MTI (Weak) | 23313552 |
| MIRT686543 | hsa-miR-20a-5p | TRAF3IP2       | 10758     | HITS-CLIP | Functional MTI (Weak) | 23313552 |
| MIRT686598 | hsa-miR-20a-5p | TMOD3          | 29766     | HITS-CLIP | Functional MTI (Weak) | 23313552 |
| MIRT686843 | hsa-miR-20a-5p | SLC7A11        | 23657     | HITS-CLIP | Functional MTI (Weak) | 23313552 |
| MIRT686896 | hsa-miR-20a-5p | SLC1A5         | 6510      | HITS-CLIP | Functional MTI (Weak) | 23313552 |
| MIRT686996 | hsa-miR-20a-5p | SERINC1        | 57515     | HITS-CLIP | Functional MTI (Weak) | 23313552 |

|            |                |             |           |                                                                        |                       |          |
|------------|----------------|-------------|-----------|------------------------------------------------------------------------|-----------------------|----------|
| MIRT687060 | hsa-miR-20a-5p | RNF115      | 27246     | HITS-CLIP                                                              | Functional MTI (Weak) | 23313552 |
| MIRT687095 | hsa-miR-20a-5p | RABGAP1L    | 9910      | HITS-CLIP                                                              | Functional MTI (Weak) | 23313552 |
| MIRT687270 | hsa-miR-20a-5p | PDHB        | 5162      | HITS-CLIP                                                              | Functional MTI (Weak) | 23313552 |
| MIRT687666 | hsa-miR-20a-5p | LRIF1       | 55791     | HITS-CLIP                                                              | Functional MTI (Weak) | 23313552 |
| MIRT687874 | hsa-miR-20a-5p | ISCA2       | 122961    | HITS-CLIP                                                              | Functional MTI (Weak) | 23313552 |
| MIRT687999 | hsa-miR-20a-5p | GTF2IRD2    | 84163     | HITS-CLIP                                                              | Functional MTI (Weak) | 23313552 |
| MIRT688139 | hsa-miR-20a-5p | GEMIN8      | 54960     | HITS-CLIP                                                              | Functional MTI (Weak) | 23313552 |
| MIRT688233 | hsa-miR-20a-5p | FKBP14      | 55033     | HITS-CLIP                                                              | Functional MTI (Weak) | 23313552 |
| MIRT688291 | hsa-miR-20a-5p | FAM213A     | 84293     | HITS-CLIP                                                              | Functional MTI (Weak) | 23313552 |
| MIRT688473 | hsa-miR-20a-5p | DNAJB4      | 11080     | HITS-CLIP                                                              | Functional MTI (Weak) | 23313552 |
| MIRT688522 | hsa-miR-20a-5p | DDI2        | 84301     | HITS-CLIP                                                              | Functional MTI (Weak) | 23313552 |
| MIRT688682 | hsa-miR-20a-5p | CPT1A       | 1374      | HITS-CLIP                                                              | Functional MTI (Weak) | 23313552 |
| MIRT688716 | hsa-miR-20a-5p | CPS1        | 1373      | HITS-CLIP                                                              | Functional MTI (Weak) | 23313552 |
| MIRT688846 | hsa-miR-20a-5p | CAPZA2      | 830       | HITS-CLIP                                                              | Functional MTI (Weak) | 23313552 |
| MIRT689128 | hsa-miR-20a-5p | ZBTB25      | 7597      | HITS-CLIP                                                              | Functional MTI (Weak) | 23313552 |
| MIRT689190 | hsa-miR-20a-5p | ZNF665      | 79788     | HITS-CLIP                                                              | Functional MTI (Weak) | 23313552 |
| MIRT689815 | hsa-miR-20a-5p | GTF2H3      | 2967      | HITS-CLIP                                                              | Functional MTI (Weak) | 23313552 |
| MIRT689860 | hsa-miR-20a-5p | HIST1H2BJ   | 8970      | HITS-CLIP                                                              | Functional MTI (Weak) | 23313552 |
| MIRT690755 | hsa-miR-20a-5p | IRAK4       | 51135     | HITS-CLIP                                                              | Functional MTI (Weak) | 23313552 |
| MIRT691000 | hsa-miR-20a-5p | ZNF578      | 147660    | HITS-CLIP                                                              | Functional MTI (Weak) | 23313552 |
| MIRT691092 | hsa-miR-20a-5p | NUGC6       | 389643    | HITS-CLIP                                                              | Functional MTI (Weak) | 23313552 |
| MIRT691349 | hsa-miR-20a-5p | KIAA1841    | 84542     | HITS-CLIP                                                              | Functional MTI (Weak) | 23313552 |
| MIRT691512 | hsa-miR-20a-5p | FOXRED2     | 80020     | HITS-CLIP                                                              | Functional MTI (Weak) | 23313552 |
| MIRT691594 | hsa-miR-20a-5p | CCDC125     | 202243    | HITS-CLIP                                                              | Functional MTI (Weak) | 23313552 |
| MIRT691630 | hsa-miR-20a-5p | IPP         | 3652      | HITS-CLIP                                                              | Functional MTI (Weak) | 23313552 |
| MIRT692090 | hsa-miR-20a-5p | ACOT9       | 23597     | HITS-CLIP                                                              | Functional MTI (Weak) | 23313552 |
| MIRT692127 | hsa-miR-20a-5p | CXorf38     | 159013    | HITS-CLIP                                                              | Functional MTI (Weak) | 23313552 |
| MIRT692336 | hsa-miR-20a-5p | RFK         | 55312     | HITS-CLIP                                                              | Functional MTI (Weak) | 23313552 |
| MIRT692398 | hsa-miR-20a-5p | LY6G5B      | 58496     | HITS-CLIP                                                              | Functional MTI (Weak) | 23313552 |
| MIRT692459 | hsa-miR-20a-5p | METTL8      | 79828     | HITS-CLIP                                                              | Functional MTI (Weak) | 23313552 |
| MIRT692562 | hsa-miR-20a-5p | PARD3       | 56288     | HITS-CLIP                                                              | Functional MTI (Weak) | 23313552 |
| MIRT692623 | hsa-miR-20a-5p | GDF5OS      | 554250    | HITS-CLIP                                                              | Functional MTI (Weak) | 23313552 |
| MIRT692804 | hsa-miR-20a-5p | SYNPO2L     | 79933     | HITS-CLIP                                                              | Functional MTI (Weak) | 23313552 |
| MIRT692835 | hsa-miR-20a-5p | C1orf50     | 79078     | HITS-CLIP                                                              | Functional MTI (Weak) | 23313552 |
| MIRT692897 | hsa-miR-20a-5p | RBM41       | 55285     | HITS-CLIP                                                              | Functional MTI (Weak) | 23313552 |
| MIRT693007 | hsa-miR-20a-5p | LGSN        | 51557     | HITS-CLIP                                                              | Functional MTI (Weak) | 23313552 |
| MIRT693157 | hsa-miR-20a-5p | THEM4       | 117145    | HITS-CLIP                                                              | Functional MTI (Weak) | 23313552 |
| MIRT693368 | hsa-miR-20a-5p | RNF34       | 80196     | HITS-CLIP                                                              | Functional MTI (Weak) | 23313552 |
| MIRT694129 | hsa-miR-20a-5p | ZNF446      | 55663     | HITS-CLIP                                                              | Functional MTI (Weak) | 23313552 |
| MIRT694213 | hsa-miR-20a-5p | ZNF347      | 84671     | HITS-CLIP                                                              | Functional MTI (Weak) | 23313552 |
| MIRT694679 | hsa-miR-20a-5p | C14orf119   | 55017     | HITS-CLIP                                                              | Functional MTI (Weak) | 23313552 |
| MIRT694833 | hsa-miR-20a-5p | STX4        | 6810      | HITS-CLIP                                                              | Functional MTI (Weak) | 23313552 |
| MIRT694955 | hsa-miR-20a-5p | ANKS4B      | 257629    | HITS-CLIP                                                              | Functional MTI (Weak) | 23313552 |
| MIRT695199 | hsa-miR-20a-5p | SLC25A33    | 84275     | HITS-CLIP                                                              | Functional MTI (Weak) | 23313552 |
| MIRT695681 | hsa-miR-20a-5p | MAN2B2      | 23324     | HITS-CLIP                                                              | Functional MTI (Weak) | 23313552 |
| MIRT695852 | hsa-miR-20a-5p | ABCG8       | 64241     | HITS-CLIP                                                              | Functional MTI (Weak) | 23313552 |
| MIRT695944 | hsa-miR-20a-5p | ZNF174      | 7727      | HITS-CLIP                                                              | Functional MTI (Weak) | 23313552 |
| MIRT696202 | hsa-miR-20a-5p | GNB5        | 10681     | HITS-CLIP                                                              | Functional MTI (Weak) | 23313552 |
| MIRT696463 | hsa-miR-20a-5p | SUGP1       | 57794     | HITS-CLIP                                                              | Functional MTI (Weak) | 23313552 |
| MIRT696879 | hsa-miR-20a-5p | UBOX5       | 22888     | HITS-CLIP                                                              | Functional MTI (Weak) | 23313552 |
| MIRT696926 | hsa-miR-20a-5p | CCDC198     | 55195     | HITS-CLIP                                                              | Functional MTI (Weak) | 23313552 |
| MIRT697265 | hsa-miR-20a-5p | ZYG11A      | 440590    | HITS-CLIP                                                              | Functional MTI (Weak) | 23313552 |
| MIRT697410 | hsa-miR-20a-5p | ZMAT3       | 64393     | HITS-CLIP                                                              | Functional MTI (Weak) | 23313552 |
| MIRT698004 | hsa-miR-20a-5p | TSPAN6      | 7105      | HITS-CLIP                                                              | Functional MTI (Weak) | 23313552 |
| MIRT699290 | hsa-miR-20a-5p | SLC6A4      | 6532      | HITS-CLIP                                                              | Functional MTI (Weak) | 23313552 |
| MIRT699653 | hsa-miR-20a-5p | SH3BP5      | 9467      | HITS-CLIP                                                              | Functional MTI (Weak) | 23313552 |
| MIRT699715 | hsa-miR-20a-5p | SF3B3       | 23450     | HITS-CLIP                                                              | Functional MTI (Weak) | 23313552 |
| MIRT700064 | hsa-miR-20a-5p | RPL14       | 9045      | HITS-CLIP                                                              | Functional MTI (Weak) | 23313552 |
| MIRT700122 | hsa-miR-20a-5p | RNF19B      | 127544    | HITS-CLIP                                                              | Functional MTI (Weak) | 23313552 |
| MIRT701130 | hsa-miR-20a-5p | PAPD5       | 64282     | HITS-CLIP                                                              | Functional MTI (Weak) | 23313552 |
| MIRT701314 | hsa-miR-20a-5p | NUDT3       | 11165     | HITS-CLIP                                                              | Functional MTI (Weak) | 23313552 |
| MIRT701596 | hsa-miR-20a-5p | MYPN        | 84665     | HITS-CLIP                                                              | Functional MTI (Weak) | 23313552 |
| MIRT702396 | hsa-miR-20a-5p | KLF10       | 7071      | HITS-CLIP                                                              | Functional MTI (Weak) | 23313552 |
| MIRT702545 | hsa-miR-20a-5p | KCND3       | 3752      | HITS-CLIP                                                              | Functional MTI (Weak) | 23313552 |
| MIRT703111 | hsa-miR-20a-5p | GPRIN3      | 285513    | HITS-CLIP                                                              | Functional MTI (Weak) | 23313552 |
| MIRT704130 | hsa-miR-20a-5p | DRAXIN      | 374946    | HITS-CLIP                                                              | Functional MTI (Weak) | 23313552 |
| MIRT704161 | hsa-miR-20a-5p | DNAL1       | 83544     | HITS-CLIP                                                              | Functional MTI (Weak) | 23313552 |
| MIRT704217 | hsa-miR-20a-5p | LDHD        | 197257    | HITS-CLIP                                                              | Functional MTI (Weak) | 23313552 |
| MIRT704783 | hsa-miR-20a-5p | CDKN2AIPNL  | 91368     | HITS-CLIP                                                              | Functional MTI (Weak) | 23313552 |
| MIRT705104 | hsa-miR-20a-5p | ABHD18      | 80167     | HITS-CLIP                                                              | Functional MTI (Weak) | 23313552 |
| MIRT705369 | hsa-miR-20a-5p | ATP1B3      | 483       | HITS-CLIP                                                              | Functional MTI (Weak) | 23313552 |
| MIRT706125 | hsa-miR-20a-5p | ENTPD4      | 9583      | HITS-CLIP                                                              | Functional MTI (Weak) | 22927820 |
| MIRT706295 | hsa-miR-20a-5p | SLC35F6     | 54978     | HITS-CLIP                                                              | Functional MTI (Weak) | 22927820 |
| MIRT706331 | hsa-miR-20a-5p | CCDC30      | 728621    | HITS-CLIP                                                              | Functional MTI (Weak) | 22927820 |
| MIRT706371 | hsa-miR-20a-5p | STAC2       | 342667    | HITS-CLIP                                                              | Functional MTI (Weak) | 22927820 |
| MIRT706423 | hsa-miR-20a-5p | HAS2        | 3037      | HITS-CLIP                                                              | Functional MTI (Weak) | 22927820 |
| MIRT706534 | hsa-miR-20a-5p | MTMR9       | 66036     | HITS-CLIP                                                              | Functional MTI (Weak) | 22927820 |
| MIRT707608 | hsa-miR-20a-5p | PCNX2       | 80003     | HITS-CLIP                                                              | Functional MTI (Weak) | 21572407 |
| MIRT707836 | hsa-miR-20a-5p | TMEM133     | 83935     | HITS-CLIP                                                              | Functional MTI (Weak) | 21572407 |
| MIRT708390 | hsa-miR-20a-5p | CDIPT       | 10423     | HITS-CLIP                                                              | Functional MTI (Weak) | 19536157 |
| MIRT708469 | hsa-miR-20a-5p | MAPKAPK5    | 8550      | HITS-CLIP                                                              | Functional MTI (Weak) | 19536157 |
| MIRT709092 | hsa-miR-20a-5p | FAHD1       | 81889     | HITS-CLIP                                                              | Functional MTI (Weak) | 19536157 |
| MIRT709557 | hsa-miR-20a-5p | ZBED1       | 9189      | HITS-CLIP                                                              | Functional MTI (Weak) | 19536157 |
| MIRT710425 | hsa-miR-20a-5p | YTHDC1      | 91746     | HITS-CLIP                                                              | Functional MTI (Weak) | 19536157 |
| MIRT711789 | hsa-miR-20a-5p | REFXAP      | 5994      | HITS-CLIP                                                              | Functional MTI (Weak) | 19536157 |
| MIRT713354 | hsa-miR-20a-5p | KLRD1       | 3824      | HITS-CLIP                                                              | Functional MTI (Weak) | 19536157 |
| MIRT714326 | hsa-miR-20a-5p | ZNF454      | 285676    | HITS-CLIP                                                              | Functional MTI (Weak) | 19536157 |
| MIRT716560 | hsa-miR-20a-5p | GOLGA2      | 2801      | HITS-CLIP                                                              | Functional MTI (Weak) | 19536157 |
| MIRT719091 | hsa-miR-20a-5p | ACOX1       | 51        | HITS-CLIP                                                              | Functional MTI (Weak) | 19536157 |
| MIRT725227 | hsa-miR-20a-5p | PEA15       | 8682      | HITS-CLIP                                                              | Functional MTI (Weak) | 19536157 |
| MIRT731268 | hsa-miR-20a-5p | RB1CC1      | 9821      | Luciferase reporter assay                                              | Functional MTI        | 26829385 |
| MIRT731837 | hsa-miR-20a-5p | NFKB1B      | 4793      | Immunohistochemistry//Luciferase reporter assay//qRT-PCR//Western blot | Functional MTI        | 26286834 |
| MIRT732249 | hsa-miR-20a-5p | KIF26B      | 55083     | //Luciferase reporter assay//qRT-PCR//Western blot                     | Functional MTI        | 27499703 |
| MIRT732435 | hsa-miR-20a-5p | TIMP2       | 7077      | Luciferase reporter assay                                              | Functional MTI        | 24704830 |
| MIRT732531 | hsa-miR-20a-5p | P TENP1     | 11191     | qRT-PCR                                                                | Functional MTI (Weak) | 25617127 |
| MIRT732671 | hsa-miR-20a-5p | NTN4        | 59277     | In situ hybridization//Next Generation Sequencing (NGS)//qRT-PCR       | Functional MTI (Weak) | 26233958 |
| MIRT734034 | hsa-miR-20a-5p | TGFBR1      | 7046      | Immunoblot//Immunofluorescence//Luciferase reporter assay//qRT-PCR     | Functional MTI        | 26729221 |
| MIRT734853 | hsa-miR-20a-5p | PTPRO       | 5800      | Luciferase reporter assay                                              | Functional MTI        | 27720936 |
| MIRT734854 | hsa-miR-20a-5p | PPP2R2A     | 5520      | Luciferase reporter assay                                              | Functional MTI        | 27720936 |
| MIRT735333 | hsa-miR-20a-5p | DAPK3       | 1613      | GFP reporter assay//qRT-PCR//Western blot                              | Functional MTI        | 26117336 |
| MIRT738870 | hsa-miR-20a-5p | DCBLD2      | 131566    | PAR-CLIP                                                               | Functional MTI (Weak) | 26701625 |
| MIRT738871 | hsa-miR-20a-5p | EREG        | 2069      | PAR-CLIP                                                               | Functional MTI (Weak) | 26701625 |
| MIRT738872 | hsa-miR-20a-5p | GPR183      | 1880      | PAR-CLIP                                                               | Functional MTI (Weak) | 26701625 |
| MIRT738873 | hsa-miR-20a-5p | MINOS1-NBL1 | 100532736 | PAR-CLIP                                                               | Functional MTI (Weak) | 26701625 |
| MIRT738874 | hsa-miR-20a-5p | NBL1        | 4681      | PAR-CLIP                                                               | Functional MTI (Weak) | 26701625 |



|            |                |          |        |           |                       |          |
|------------|----------------|----------|--------|-----------|-----------------------|----------|
| MIRT738875 | hsa-miR-20a-5p | PLEKHM1  | 9842   | PAR-CLIP  | Functional MTI (Weak) | 26701625 |
| MIRT738876 | hsa-miR-20a-5p | RAB31P   | 117177 | PAR-CLIP  | Functional MTI (Weak) | 26701625 |
| MIRT738877 | hsa-miR-20a-5p | SYNJ2BP  | 55333  | PAR-CLIP  | Functional MTI (Weak) | 26701625 |
| MIRT763757 | hsa-miR-20a-5p | DPP9     | 91039  | PAR-CLIP  | Functional MTI (Weak) | 27292025 |
| MIRT763758 | hsa-miR-20a-5p | DSTYK    | 25778  | PAR-CLIP  | Functional MTI (Weak) | 27292025 |
| MIRT763759 | hsa-miR-20a-5p | ISY1     | 57461  | PAR-CLIP  | Functional MTI (Weak) | 27292025 |
| MIRT763760 | hsa-miR-20a-5p | KPNA6    | 23633  | PAR-CLIP  | Functional MTI (Weak) | 27292025 |
| MIRT763761 | hsa-miR-20a-5p | NR3C1    | 2908   | PAR-CLIP  | Functional MTI (Weak) | 27292025 |
| MIRT763762 | hsa-miR-20a-5p | PMAIP1   | 5366   | PAR-CLIP  | Functional MTI (Weak) | 27292025 |
| MIRT763763 | hsa-miR-20a-5p | SESN1    | 27244  | PAR-CLIP  | Functional MTI (Weak) | 27292025 |
| MIRT763764 | hsa-miR-20a-5p | SLC12A6  | 9990   | PAR-CLIP  | Functional MTI (Weak) | 27292025 |
| MIRT763765 | hsa-miR-20a-5p | TRIM65   | 201292 | PAR-CLIP  | Functional MTI (Weak) | 27292025 |
| MIRT784171 | hsa-miR-20a-5p | ARMT1    | 79624  | HITS-CLIP | Functional MTI (Weak) | 27418678 |
| MIRT784172 | hsa-miR-20a-5p | C17orf75 | 64149  | HITS-CLIP | Functional MTI (Weak) | 27418678 |
| MIRT784173 | hsa-miR-20a-5p | FAM241A  | 132720 | HITS-CLIP | Functional MTI (Weak) | 27418678 |
| MIRT784174 | hsa-miR-20a-5p | LRRCS58  | 116064 | HITS-CLIP | Functional MTI (Weak) | 27418678 |
| MIRT784175 | hsa-miR-20a-5p | MPPE1    | 65258  | HITS-CLIP | Functional MTI (Weak) | 27418678 |
| MIRT784176 | hsa-miR-20a-5p | MRPS10   | 55173  | HITS-CLIP | Functional MTI (Weak) | 27418678 |
| MIRT784177 | hsa-miR-20a-5p | OLAH     | 55301  | HITS-CLIP | Functional MTI (Weak) | 27418678 |
| MIRT784178 | hsa-miR-20a-5p | SON      | 6651   | HITS-CLIP | Functional MTI (Weak) | 27418678 |
| MIRT784179 | hsa-miR-20a-5p | SP2      | 6668   | HITS-CLIP | Functional MTI (Weak) | 27418678 |
| MIRT784180 | hsa-miR-20a-5p | WDR92    | 116143 | HITS-CLIP | Functional MTI (Weak) | 27418678 |
| MIRT784181 | hsa-miR-20a-5p | ZNF786   | 136051 | HITS-CLIP | Functional MTI (Weak) | 27418678 |
| MIRT061357 | hsa-miR-194-3p | WEE1     | 7465   | PAR-CLIP  | Functional MTI (Weak) | 23446348 |
| MIRT144690 | hsa-miR-194-3p | SLC7A5   | 8140   | PAR-CLIP  | Functional MTI (Weak) | 23592263 |
| MIRT180544 | hsa-miR-194-3p | TXNIP    | 10628  | PAR-CLIP  | Functional MTI (Weak) | 23446348 |
| MIRT185104 | hsa-miR-194-3p | LYPLAL1  | 127018 | PAR-CLIP  | Functional MTI (Weak) | 23592263 |
| MIRT221017 | hsa-miR-194-3p | UBN2     | 254048 | HITS-CLIP | Functional MTI (Weak) | 24906430 |
| MIRT336220 | hsa-miR-194-3p | SKI      | 6497   | PAR-CLIP  | Functional MTI (Weak) | 20371350 |
| MIRT356733 | hsa-miR-194-3p | C5orf30  | 90355  | PAR-CLIP  | Functional MTI (Weak) | 22100165 |
| MIRT361010 | hsa-miR-194-3p | CDC5L    | 988    | PAR-CLIP  | Functional MTI (Weak) | 23592263 |
| MIRT378601 | hsa-miR-194-3p | KCNQ5    | 56479  | HITS-CLIP | Functional MTI (Weak) | 24906430 |
| MIRT442819 | hsa-miR-194-3p | CDH6     | 1004   | PAR-CLIP  | Functional MTI (Weak) | 22100165 |
| MIRT450939 | hsa-miR-194-3p | BDP1     | 55814  | PAR-CLIP  | Functional MTI (Weak) | 22100165 |
| MIRT453122 | hsa-miR-194-3p | HOXC4    | 3221   | PAR-CLIP  | Functional MTI (Weak) | 23592263 |
| MIRT453144 | hsa-miR-194-3p | PLA2G2C  | 391013 | PAR-CLIP  | Functional MTI (Weak) | 23592263 |
| MIRT453556 | hsa-miR-194-3p | PRR12    | 57479  | PAR-CLIP  | Functional MTI (Weak) | 23592263 |
| MIRT453645 | hsa-miR-194-3p | SLC4A2   | 6522   | PAR-CLIP  | Functional MTI (Weak) | 23592263 |
| MIRT453728 | hsa-miR-194-3p | RAP1GDS1 | 5910   | PAR-CLIP  | Functional MTI (Weak) | 23592263 |
| MIRT453746 | hsa-miR-194-3p | CSNK1E   | 1454   | PAR-CLIP  | Functional MTI (Weak) | 23592263 |
| MIRT453811 | hsa-miR-194-3p | KBTBD12  | 166348 | PAR-CLIP  | Functional MTI (Weak) | 23592263 |
| MIRT454397 | hsa-miR-194-3p | NRG4     | 145957 | PAR-CLIP  | Functional MTI (Weak) | 23592263 |
| MIRT454450 | hsa-miR-194-3p | QRFRP    | 84109  | PAR-CLIP  | Functional MTI (Weak) | 23592263 |
| MIRT455169 | hsa-miR-194-3p | SUV39H1  | 6839   | PAR-CLIP  | Functional MTI (Weak) | 23592263 |
| MIRT455791 | hsa-miR-194-3p | TAF8     | 129685 | PAR-CLIP  | Functional MTI (Weak) | 23592263 |
| MIRT457702 | hsa-miR-194-3p | ZNF587   | 84914  | PAR-CLIP  | Functional MTI (Weak) | 23592263 |
| MIRT457893 | hsa-miR-194-3p | THEM6    | 51337  | PAR-CLIP  | Functional MTI (Weak) | 23592263 |
| MIRT458690 | hsa-miR-194-3p | MRI1     | 84245  | PAR-CLIP  | Functional MTI (Weak) | 23592263 |
| MIRT458897 | hsa-miR-194-3p | PFAS     | 5198   | PAR-CLIP  | Functional MTI (Weak) | 23592263 |
| MIRT461741 | hsa-miR-194-3p | NDUFA2   | 4695   | PAR-CLIP  | Functional MTI (Weak) | 23592263 |
| MIRT461896 | hsa-miR-194-3p | NECAB3   | 63941  | PAR-CLIP  | Functional MTI (Weak) | 23592263 |
| MIRT463513 | hsa-miR-194-3p | ZBTB8B   | 728116 | PAR-CLIP  | Functional MTI (Weak) | 23592263 |
| MIRT463723 | hsa-miR-194-3p | YWHAE    | 7531   | PAR-CLIP  | Functional MTI (Weak) | 23592263 |
| MIRT464202 | hsa-miR-194-3p | VGLL4    | 9686   | PAR-CLIP  | Functional MTI (Weak) | 23592263 |
| MIRT464331 | hsa-miR-194-3p | UST      | 10090  | PAR-CLIP  | Functional MTI (Weak) | 23592263 |
| MIRT465076 | hsa-miR-194-3p | TSR1     | 55720  | PAR-CLIP  | Functional MTI (Weak) | 23592263 |
| MIRT465446 | hsa-miR-194-3p | TP53     | 7157   | PAR-CLIP  | Functional MTI (Weak) | 23592263 |
| MIRT466583 | hsa-miR-194-3p | TBC1D2B  | 23102  | PAR-CLIP  | Functional MTI (Weak) | 23592263 |
| MIRT467140 | hsa-miR-194-3p | SREK1IP1 | 285672 | PAR-CLIP  | Functional MTI (Weak) | 23592263 |
| MIRT467684 | hsa-miR-194-3p | SLC38A2  | 54407  | PAR-CLIP  | Functional MTI (Weak) | 23592263 |
| MIRT468107 | hsa-miR-194-3p | SH3TC2   | 79628  | PAR-CLIP  | Functional MTI (Weak) | 23592263 |
| MIRT468323 | hsa-miR-194-3p | SF3B3    | 23450  | PAR-CLIP  | Functional MTI (Weak) | 23592263 |
| MIRT468621 | hsa-miR-194-3p | SUMO1    | 7341   | PAR-CLIP  | Functional MTI (Weak) | 23592263 |
| MIRT469332 | hsa-miR-194-3p | RGP1     | 9827   | PAR-CLIP  | Functional MTI (Weak) | 23592263 |
| MIRT469574 | hsa-miR-194-3p | RARA     | 5914   | PAR-CLIP  | Functional MTI (Weak) | 23592263 |
| MIRT469797 | hsa-miR-194-3p | RAB15    | 376267 | PAR-CLIP  | Functional MTI (Weak) | 23592263 |
| MIRT470444 | hsa-miR-194-3p | PPP1R15B | 84919  | PAR-CLIP  | Functional MTI (Weak) | 23592263 |
| MIRT470693 | hsa-miR-194-3p | POLR2D   | 5433   | PAR-CLIP  | Functional MTI (Weak) | 23592263 |
| MIRT472614 | hsa-miR-194-3p | NAA50    | 80218  | PAR-CLIP  | Functional MTI (Weak) | 23592263 |
| MIRT474393 | hsa-miR-194-3p | KLK10    | 5655   | PAR-CLIP  | Functional MTI (Weak) | 23592263 |
| MIRT475364 | hsa-miR-194-3p | ICOSLG   | 23308  | PAR-CLIP  | Functional MTI (Weak) | 23592263 |
| MIRT477889 | hsa-miR-194-3p | DYNLL2   | 140735 | PAR-CLIP  | Functional MTI (Weak) | 23592263 |
| MIRT478304 | hsa-miR-194-3p | DDX19A   | 55308  | PAR-CLIP  | Functional MTI (Weak) | 23592263 |
| MIRT478360 | hsa-miR-194-3p | DDI2     | 84301  | PAR-CLIP  | Functional MTI (Weak) | 23592263 |
| MIRT479609 | hsa-miR-194-3p | CDC25A   | 993    | PAR-CLIP  | Functional MTI (Weak) | 23592263 |
| MIRT480634 | hsa-miR-194-3p | BTBD3    | 22903  | PAR-CLIP  | Functional MTI (Weak) | 23592263 |
| MIRT480763 | hsa-miR-194-3p | BMP3     | 651    | PAR-CLIP  | Functional MTI (Weak) | 23592263 |
| MIRT480868 | hsa-miR-194-3p | BHLHB9   | 80823  | PAR-CLIP  | Functional MTI (Weak) | 23592263 |
| MIRT481325 | hsa-miR-194-3p | ATP5A1   | 498    | PAR-CLIP  | Functional MTI (Weak) | 23592263 |
| MIRT481330 | hsa-miR-194-3p | ATL3     | 25923  | PAR-CLIP  | Functional MTI (Weak) | 23592263 |
| MIRT481840 | hsa-miR-194-3p | AP1S1    | 1174   | PAR-CLIP  | Functional MTI (Weak) | 23592263 |
| MIRT484003 | hsa-miR-194-3p | ATAD5    | 79915  | PAR-CLIP  | Functional MTI (Weak) | 23592263 |
| MIRT485075 | hsa-miR-194-3p | SPATA13  | 221178 | PAR-CLIP  | Functional MTI (Weak) | 23592263 |
| MIRT487291 | hsa-miR-194-3p | GPAT4    | 137964 | PAR-CLIP  | Functional MTI (Weak) | 23592263 |
| MIRT487653 | hsa-miR-194-3p | METTL22  | 79091  | PAR-CLIP  | Functional MTI (Weak) | 23592263 |
| MIRT490705 | hsa-miR-194-3p | FSTL4    | 23105  | PAR-CLIP  | Functional MTI (Weak) | 23592263 |
| MIRT492290 | hsa-miR-194-3p | SHISA6   | 388336 | PAR-CLIP  | Functional MTI (Weak) | 23592263 |
| MIRT493159 | hsa-miR-194-3p | MKNK2    | 2872   | PAR-CLIP  | Functional MTI (Weak) | 23592263 |
| MIRT495715 | hsa-miR-194-3p | PADI1    | 29943  | PAR-CLIP  | Functional MTI (Weak) | 22291592 |
| MIRT502209 | hsa-miR-194-3p | HSPB8    | 26353  | PAR-CLIP  | Functional MTI (Weak) | 24398324 |
| MIRT502502 | hsa-miR-194-3p | EV15     | 7813   | PAR-CLIP  | Functional MTI (Weak) | 24398324 |
| MIRT513113 | hsa-miR-194-3p | IP6K1    | 9807   | PAR-CLIP  | Functional MTI (Weak) | 23446348 |
| MIRT513614 | hsa-miR-194-3p | VPS37B   | 79720  | PAR-CLIP  | Functional MTI (Weak) | 23446348 |
| MIRT514362 | hsa-miR-194-3p | UBBP4    | 23666  | PAR-CLIP  | Functional MTI (Weak) | 23446348 |
| MIRT528132 | hsa-miR-194-3p | PPP1R10  | 5514   | PAR-CLIP  | Functional MTI (Weak) | 22012620 |
| MIRT530501 | hsa-miR-194-3p | FADS6    | 283985 | PAR-CLIP  | Functional MTI (Weak) | 22012620 |
| MIRT533066 | hsa-miR-194-3p | ZBTB34   | 403341 | PAR-CLIP  | Functional MTI (Weak) | 22012620 |
| MIRT538400 | hsa-miR-194-3p | CPT1A    | 1374   | PAR-CLIP  | Functional MTI (Weak) | 22012620 |
| MIRT540488 | hsa-miR-194-3p | BLOC1S4  | 55330  | PAR-CLIP  | Functional MTI (Weak) | 21572407 |
| MIRT540981 | hsa-miR-194-3p | NCBP3    | 55421  | PAR-CLIP  | Functional MTI (Weak) | 21572407 |
| MIRT559903 | hsa-miR-194-3p | CNNM4    | 26504  | PAR-CLIP  | Functional MTI (Weak) | 20371350 |
| MIRT561819 | hsa-miR-194-3p | NUFIP2   | 57532  | PAR-CLIP  | Functional MTI (Weak) | 20371350 |
| MIRT562375 | hsa-miR-194-3p | ERI2     | 112479 | PAR-CLIP  | Functional MTI (Weak) | 20371350 |
| MIRT567681 | hsa-miR-194-3p | EIF4EBP1 | 1978   | PAR-CLIP  | Functional MTI (Weak) | 20371350 |
| MIRT567741 | hsa-miR-194-3p | DLX2     | 1746   | PAR-CLIP  | Functional MTI (Weak) | 20371350 |

|             |                 |           |        |                                                                  |                       |          |
|-------------|-----------------|-----------|--------|------------------------------------------------------------------|-----------------------|----------|
| MIRT568810  | hsa-miR-194-3p  | VPS37D    | 155382 | PAR-CLIP                                                         | Functional MTI (Weak) | 20371350 |
| MIRT571055  | hsa-miR-194-3p  | POLQ      | 10721  | PAR-CLIP                                                         | Functional MTI (Weak) | 20371350 |
| MIRT572696  | hsa-miR-194-3p  | NCMAP     | 400746 | PAR-CLIP                                                         | Functional MTI (Weak) | 20371350 |
| MIRT624884  | hsa-miR-194-3p  | AASDHPPT  | 60496  | HITS-CLIP                                                        | Functional MTI (Weak) | 23824327 |
| MIRT642127  | hsa-miR-194-3p  | DDA1      | 79016  | HITS-CLIP                                                        | Functional MTI (Weak) | 23824327 |
| MIRT644192  | hsa-miR-194-3p  | LAT2      | 7462   | HITS-CLIP                                                        | Functional MTI (Weak) | 23824327 |
| MIRT665131  | hsa-miR-194-3p  | EMC2      | 9694   | HITS-CLIP                                                        | Functional MTI (Weak) | 23824327 |
| MIRT667938  | hsa-miR-194-3p  | HYPK      | 25764  | HITS-CLIP                                                        | Functional MTI (Weak) | 23824327 |
| MIRT668481  | hsa-miR-194-3p  | EXOSC2    | 23404  | HITS-CLIP                                                        | Functional MTI (Weak) | 23824327 |
| MIRT700629  | hsa-miR-194-3p  | PRDM10    | 56980  | HITS-CLIP                                                        | Functional MTI (Weak) | 23313552 |
| MIRT709486  | hsa-miR-194-3p  | LOXL2     | 4017   | HITS-CLIP                                                        | Functional MTI (Weak) | 19536157 |
| MIRT7111951 | hsa-miR-194-3p  | SLC7A14   | 57709  | HITS-CLIP                                                        | Functional MTI (Weak) | 19536157 |
| MIRT721123  | hsa-miR-194-3p  | PSMC2     | 5701   | HITS-CLIP                                                        | Functional MTI (Weak) | 19536157 |
| MIRT724619  | hsa-miR-194-3p  | SNAP25    | 6616   | HITS-CLIP                                                        | Functional MTI (Weak) | 19536157 |
| MIRT735492  | hsa-miR-194-3p  | ARHGEF2   | 9181   | Luciferase reporter assay//qRT-PCR//Western blot                 | Functional MTI        | 27573550 |
| MIRT738581  | hsa-miR-194-3p  | ADRM1     | 11047  | PAR-CLIP                                                         | Functional MTI (Weak) | 26701625 |
| MIRT738582  | hsa-miR-194-3p  | ALDH9A1   | 223    | PAR-CLIP                                                         | Functional MTI (Weak) | 26701625 |
| MIRT738583  | hsa-miR-194-3p  | ARPIN     | 348110 | PAR-CLIP                                                         | Functional MTI (Weak) | 26701625 |
| MIRT738584  | hsa-miR-194-3p  | ARRB2     | 409    | PAR-CLIP                                                         | Functional MTI (Weak) | 26701625 |
| MIRT738585  | hsa-miR-194-3p  | CARM1     | 10498  | PAR-CLIP                                                         | Functional MTI (Weak) | 26701625 |
| MIRT738586  | hsa-miR-194-3p  | CDCP1     | 64866  | PAR-CLIP                                                         | Functional MTI (Weak) | 26701625 |
| MIRT738587  | hsa-miR-194-3p  | ECE1      | 1889   | PAR-CLIP                                                         | Functional MTI (Weak) | 26701625 |
| MIRT738588  | hsa-miR-194-3p  | ESYT1     | 23344  | PAR-CLIP                                                         | Functional MTI (Weak) | 26701625 |
| MIRT738589  | hsa-miR-194-3p  | GLG1      | 2734   | PAR-CLIP                                                         | Functional MTI (Weak) | 26701625 |
| MIRT738590  | hsa-miR-194-3p  | GPRC5A    | 9052   | PAR-CLIP                                                         | Functional MTI (Weak) | 26701625 |
| MIRT738591  | hsa-miR-194-3p  | HDFG      | 3068   | PAR-CLIP                                                         | Functional MTI (Weak) | 26701625 |
| MIRT738592  | hsa-miR-194-3p  | HSP90AB1  | 3326   | PAR-CLIP                                                         | Functional MTI (Weak) | 26701625 |
| MIRT738593  | hsa-miR-194-3p  | MAPK8IP3  | 23162  | PAR-CLIP                                                         | Functional MTI (Weak) | 26701625 |
| MIRT738594  | hsa-miR-194-3p  | NACC1     | 112939 | PAR-CLIP                                                         | Functional MTI (Weak) | 26701625 |
| MIRT738595  | hsa-miR-194-3p  | NPLOC4    | 55666  | PAR-CLIP                                                         | Functional MTI (Weak) | 26701625 |
| MIRT738596  | hsa-miR-194-3p  | NR1H2     | 7376   | PAR-CLIP                                                         | Functional MTI (Weak) | 26701625 |
| MIRT738597  | hsa-miR-194-3p  | PHLDA3    | 23612  | PAR-CLIP                                                         | Functional MTI (Weak) | 26701625 |
| MIRT738598  | hsa-miR-194-3p  | PTPN1     | 5770   | PAR-CLIP                                                         | Functional MTI (Weak) | 26701625 |
| MIRT738599  | hsa-miR-194-3p  | RAB11FIP4 | 84440  | PAR-CLIP                                                         | Functional MTI (Weak) | 26701625 |
| MIRT738600  | hsa-miR-194-3p  | SEC61A1   | 29927  | PAR-CLIP                                                         | Functional MTI (Weak) | 26701625 |
| MIRT738601  | hsa-miR-194-3p  | TK1       | 7083   | PAR-CLIP                                                         | Functional MTI (Weak) | 26701625 |
| MIRT738602  | hsa-miR-194-3p  | TRMU      | 55687  | PAR-CLIP                                                         | Functional MTI (Weak) | 26701625 |
| MIRT738603  | hsa-miR-194-3p  | YARS      | 8565   | PAR-CLIP                                                         | Functional MTI (Weak) | 26701625 |
| MIRT738604  | hsa-miR-194-3p  | ZBTB7A    | 51341  | PAR-CLIP                                                         | Functional MTI (Weak) | 26701625 |
| MIRT763455  | hsa-miR-194-3p  | DUSP2     | 1844   | PAR-CLIP                                                         | Functional MTI (Weak) | 27292025 |
| MIRT763456  | hsa-miR-194-3p  | FBXO48    | 554251 | PAR-CLIP                                                         | Functional MTI (Weak) | 27292025 |
| MIRT763457  | hsa-miR-194-3p  | GRK2      | 156    | PAR-CLIP                                                         | Functional MTI (Weak) | 27292025 |
| MIRT763458  | hsa-miR-194-3p  | ISCU      | 23479  | PAR-CLIP                                                         | Functional MTI (Weak) | 27292025 |
| MIRT763459  | hsa-miR-194-3p  | LIPG      | 9388   | PAR-CLIP                                                         | Functional MTI (Weak) | 27292025 |
| MIRT763460  | hsa-miR-194-3p  | MINK1     | 50488  | PAR-CLIP                                                         | Functional MTI (Weak) | 27292025 |
| MIRT763461  | hsa-miR-194-3p  | MRPS23    | 51649  | PAR-CLIP                                                         | Functional MTI (Weak) | 27292025 |
| MIRT763462  | hsa-miR-194-3p  | ORC6      | 23594  | PAR-CLIP                                                         | Functional MTI (Weak) | 27292025 |
| MIRT763463  | hsa-miR-194-3p  | TTC22     | 55001  | PAR-CLIP                                                         | Functional MTI (Weak) | 27292025 |
| MIRT790147  | hsa-miR-194-3p  | ITPA      | 3704   | HITS-CLIP                                                        | Functional MTI (Weak) | 28735896 |
| MIRT790148  | hsa-miR-194-3p  | PQLC1     | 80148  | HITS-CLIP                                                        | Functional MTI (Weak) | 28735896 |
| MIRT000020  | hsa-miR-148a-3p | DNMT1     | 1786   | Luciferase reporter assay                                        | Functional MTI        | 20146264 |
| MIRT000297  | hsa-miR-148a-3p | HLA-G     | 3135   | Luciferase reporter assay                                        | Functional MTI        | 17847008 |
| MIRT000298  | hsa-miR-148a-3p | TGIF2     | 60436  | Luciferase reporter assay//Western blot                          | Functional MTI        | 18768788 |
| MIRT000955  | hsa-miR-148a-3p | DNMT3B    | 1789   | GFP reporter assay//Western blot//qRT-PCR                        | Functional MTI        | 18367714 |
| MIRT003998  | hsa-miR-148a-3p | NR1I2     | 8856   | Luciferase reporter assay//qRT-PCR                               | Functional MTI        | 18268015 |
| MIRT004504  | hsa-miR-148a-3p | RPS6KA5   | 9252   | qRT-PCR//Luciferase reporter assay//Western blot//Reporter assay | Functional MTI        | 20406806 |
| MIRT005898  | hsa-miR-148a-3p | CCKBR     | 887    | Luciferase reporter assay//Microarray                            | Functional MTI        | 21168126 |
| MIRT006859  | hsa-miR-148a-3p | IRS1      | 3667   | Luciferase reporter assay//Western blot                          | Functional MTI        | 22935141 |
| MIRT006946  | hsa-miR-148a-3p | ACVR1     | 90     | Luciferase reporter assay                                        | Functional MTI        | 22408438 |
| MIRT006975  | hsa-miR-148a-3p | BCL2      | 596    | Luciferase reporter assay                                        | Functional MTI        | 21455217 |
| MIRT007017  | hsa-miR-148a-3p | TMED7     | 51014  | Luciferase reporter assay                                        | Functional MTI        | 21552422 |
| MIRT025970  | hsa-miR-148a-3p | GPATCH8   | 23131  | Sequencing                                                       | Functional MTI (Weak) | 20371350 |
| MIRT025971  | hsa-miR-148a-3p | TMEM14A   | 28978  | Sequencing                                                       | Functional MTI (Weak) | 20371350 |
| MIRT025972  | hsa-miR-148a-3p | ANP32A    | 8125   | Sequencing                                                       | Functional MTI (Weak) | 20371350 |
| MIRT025973  | hsa-miR-148a-3p | RAB1B     | 81876  | Sequencing                                                       | Functional MTI (Weak) | 20371350 |
| MIRT025974  | hsa-miR-148a-3p | HSP90B1   | 7184   | Sequencing                                                       | Functional MTI (Weak) | 20371350 |
| MIRT025975  | hsa-miR-148a-3p | POFUT1    | 23509  | Sequencing                                                       | Functional MTI (Weak) | 20371350 |
| MIRT025976  | hsa-miR-148a-3p | CYCS      | 54205  | Sequencing                                                       | Functional MTI (Weak) | 20371350 |
| MIRT025977  | hsa-miR-148a-3p | ADARB1    | 104    | Sequencing                                                       | Functional MTI (Weak) | 20371350 |
| MIRT025978  | hsa-miR-148a-3p | CBX3      | 11335  | Sequencing                                                       | Functional MTI (Weak) | 20371350 |
| MIRT025979  | hsa-miR-148a-3p | UQCRCQ    | 27089  | Sequencing                                                       | Functional MTI (Weak) | 20371350 |
| MIRT025980  | hsa-miR-148a-3p | SPRY2     | 10253  | Sequencing                                                       | Functional MTI (Weak) | 20371350 |
| MIRT025981  | hsa-miR-148a-3p | PAN3      | 255967 | Sequencing                                                       | Functional MTI (Weak) | 20371350 |
| MIRT025982  | hsa-miR-148a-3p | KANSL1    | 284058 | Sequencing                                                       | Functional MTI (Weak) | 20371350 |
| MIRT025983  | hsa-miR-148a-3p | GAS1      | 2619   | Sequencing//PAR-CLIP                                             | Functional MTI (Weak) | 20371350 |
| MIRT025984  | hsa-miR-148a-3p | PTPN4     | 5775   | Sequencing                                                       | Functional MTI (Weak) | 20371350 |
| MIRT025985  | hsa-miR-148a-3p | ZNF92     | 168374 | Sequencing                                                       | Functional MTI (Weak) | 20371350 |
| MIRT025986  | hsa-miR-148a-3p | RAB10     | 10890  | Sequencing                                                       | Functional MTI (Weak) | 20371350 |
| MIRT025987  | hsa-miR-148a-3p | PAPD4     | 167153 | Sequencing                                                       | Functional MTI (Weak) | 20371350 |
| MIRT025988  | hsa-miR-148a-3p | HCCS      | 3052   | Sequencing                                                       | Functional MTI (Weak) | 20371350 |
| MIRT025989  | hsa-miR-148a-3p | WAPL      | 23063  | Sequencing                                                       | Functional MTI (Weak) | 20371350 |
| MIRT025990  | hsa-miR-148a-3p | MPP5      | 64398  | Sequencing                                                       | Functional MTI (Weak) | 20371350 |
| MIRT025991  | hsa-miR-148a-3p | ZNF490    | 57474  | Sequencing                                                       | Functional MTI (Weak) | 20371350 |
| MIRT025992  | hsa-miR-148a-3p | RAB12     | 201475 | Sequencing                                                       | Functional MTI (Weak) | 20371350 |
| MIRT025993  | hsa-miR-148a-3p | GNB5      | 10681  | Sequencing                                                       | Functional MTI (Weak) | 20371350 |
| MIRT025994  | hsa-miR-148a-3p | SNAPIN    | 23557  | Sequencing                                                       | Functional MTI (Weak) | 20371350 |
| MIRT025995  | hsa-miR-148a-3p | PSMD9     | 5715   | Sequencing                                                       | Functional MTI (Weak) | 20371350 |
| MIRT025996  | hsa-miR-148a-3p | TRIM59    | 286827 | Sequencing                                                       | Functional MTI (Weak) | 20371350 |
| MIRT025997  | hsa-miR-148a-3p | DYNLL2    | 140735 | Sequencing                                                       | Functional MTI (Weak) | 20371350 |
| MIRT025998  | hsa-miR-148a-3p | SECSBP2L  | 9728   | Sequencing//PAR-CLIP                                             | Functional MTI (Weak) | 20371350 |
| MIRT025999  | hsa-miR-148a-3p | LYSMD1    | 388695 | Sequencing                                                       | Functional MTI (Weak) | 20371350 |
| MIRT026000  | hsa-miR-148a-3p | PBXIP1    | 57326  | Sequencing                                                       | Functional MTI (Weak) | 20371350 |
| MIRT026001  | hsa-miR-148a-3p | MTMR9     | 66036  | Sequencing                                                       | Functional MTI (Weak) | 20371350 |
| MIRT026002  | hsa-miR-148a-3p | DNAJB4    | 11080  | Sequencing                                                       | Functional MTI (Weak) | 20371350 |
| MIRT026003  | hsa-miR-148a-3p | DSTYK     | 25778  | Sequencing                                                       | Functional MTI (Weak) | 20371350 |
| MIRT026004  | hsa-miR-148a-3p | LBR       | 3930   | Sequencing                                                       | Functional MTI (Weak) | 20371350 |
| MIRT026005  | hsa-miR-148a-3p | KIAA1549  | 57670  | Sequencing                                                       | Functional MTI (Weak) | 20371350 |
| MIRT026006  | hsa-miR-148a-3p | DYRK1A    | 1859   | Sequencing                                                       | Functional MTI (Weak) | 20371350 |
| MIRT026007  | hsa-miR-148a-3p | CDK19     | 23097  | Sequencing                                                       | Functional MTI (Weak) | 20371350 |
| MIRT026008  | hsa-miR-148a-3p | RAB34     | 83871  | Sequencing                                                       | Functional MTI (Weak) | 20371350 |
| MIRT026009  | hsa-miR-148a-3p | ARRDC3    | 57561  | Sequencing                                                       | Functional MTI (Weak) | 20371350 |
| MIRT026010  | hsa-miR-148a-3p | PRNP      | 5621   | Sequencing                                                       | Functional MTI (Weak) | 20371350 |
| MIRT026011  | hsa-miR-148a-3p | HOXC8     | 3224   | Sequencing                                                       | Functional MTI (Weak) | 20371350 |
| MIRT026012  | hsa-miR-148a-3p | TMEM9B    | 56674  | Sequencing                                                       | Functional MTI (Weak) | 20371350 |
| MIRT026013  | hsa-miR-148a-3p | RASSF8    | 11228  | Sequencing                                                       | Functional MTI (Weak) | 20371350 |

|            |                 |          |        |                                                                               |                       |          |
|------------|-----------------|----------|--------|-------------------------------------------------------------------------------|-----------------------|----------|
| MIRT026014 | hsa-miR-148a-3p | BTBD3    | 22903  | Sequencing//PAR-CLIP                                                          | Functional MTI (Weak) | 20371350 |
| MIRT026015 | hsa-miR-148a-3p | TNRC6A   | 27327  | Sequencing                                                                    | Functional MTI (Weak) | 20371350 |
| MIRT026016 | hsa-miR-148a-3p | SESTD1   | 91404  | Sequencing                                                                    | Functional MTI (Weak) | 20371350 |
| MIRT026017 | hsa-miR-148a-3p | CDC25B   | 994    | Reporter assay;Western blot;Other                                             | Functional MTI        | 21709669 |
| MIRT048023 | hsa-miR-148a-3p | MRPL45   | 84311  | CLASH                                                                         | Functional MTI (Weak) | 23622248 |
| MIRT048024 | hsa-miR-148a-3p | DENR     | 8562   | CLASH                                                                         | Functional MTI (Weak) | 23622248 |
| MIRT048025 | hsa-miR-148a-3p | APBP2    | 10513  | CLASH                                                                         | Functional MTI (Weak) | 23622248 |
| MIRT048026 | hsa-miR-148a-3p | SLC2A3   | 6515   | CLASH                                                                         | Functional MTI (Weak) | 23622248 |
| MIRT048027 | hsa-miR-148a-3p | PTPN23   | 25930  | CLASH                                                                         | Functional MTI (Weak) | 23622248 |
| MIRT048028 | hsa-miR-148a-3p | VPS41    | 27072  | CLASH                                                                         | Functional MTI (Weak) | 23622248 |
| MIRT048029 | hsa-miR-148a-3p | MSL3     | 10943  | CLASH                                                                         | Functional MTI (Weak) | 23622248 |
| MIRT048030 | hsa-miR-148a-3p | AMELX    | 265    | CLASH                                                                         | Functional MTI (Weak) | 23622248 |
| MIRT048031 | hsa-miR-148a-3p | OR2C3    | 81472  | CLASH                                                                         | Functional MTI (Weak) | 23622248 |
| MIRT048032 | hsa-miR-148a-3p | SLC25A3  | 5250   | CLASH                                                                         | Functional MTI (Weak) | 23622248 |
| MIRT048033 | hsa-miR-148a-3p | APC      | 324    | CLASH                                                                         | Functional MTI (Weak) | 23622248 |
| MIRT048034 | hsa-miR-148a-3p | GOLIM4   | 27333  | CLASH                                                                         | Functional MTI (Weak) | 23622248 |
| MIRT048035 | hsa-miR-148a-3p | MYCBP2   | 23077  | CLASH                                                                         | Functional MTI (Weak) | 23622248 |
| MIRT048036 | hsa-miR-148a-3p | RPS17    | 6218   | CLASH                                                                         | Functional MTI (Weak) | 23622248 |
| MIRT048037 | hsa-miR-148a-3p | HSPA4    | 3308   | CLASH                                                                         | Functional MTI (Weak) | 23622248 |
| MIRT048038 | hsa-miR-148a-3p | WDTC1    | 23038  | CLASH                                                                         | Functional MTI (Weak) | 23622248 |
| MIRT048039 | hsa-miR-148a-3p | HMGBl    | 3146   | CLASH                                                                         | Functional MTI (Weak) | 23622248 |
| MIRT048040 | hsa-miR-148a-3p | MAP3K4   | 4216   | CLASH                                                                         | Functional MTI (Weak) | 23622248 |
| MIRT048041 | hsa-miR-148a-3p | USP38    | 84640  | CLASH                                                                         | Functional MTI (Weak) | 23622248 |
| MIRT048042 | hsa-miR-148a-3p | NONO     | 4841   | CLASH                                                                         | Functional MTI (Weak) | 23622248 |
| MIRT048043 | hsa-miR-148a-3p | CCNI     | 10983  | CLASH                                                                         | Functional MTI (Weak) | 23622248 |
| MIRT048044 | hsa-miR-148a-3p | AURKB    | 9212   | CLASH                                                                         | Functional MTI (Weak) | 23622248 |
| MIRT052917 | hsa-miR-148a-3p | MMP7     | 4316   | In situ hybridization//Microarray//qRT-PCR//Western blot//Luciferase report   | Functional MTI        | 24283384 |
| MIRT053185 | hsa-miR-148a-3p | WNT10B   | 7480   | Luciferase reporter assay//Microarray//qRT-PCR//Western blot                  | Functional MTI        | 22890324 |
| MIRT053199 | hsa-miR-148a-3p | MYC      | 4609   | Immunoblot//Microarray//qRT-PCR                                               | Functional MTI (Weak) | 23389829 |
| MIRT053475 | hsa-miR-148a-3p | CDKN1B   | 1027   | In situ hybridization//Luciferase reporter assay//Northern blot//Western blot | Functional MTI        | 21552422 |
| MIRT053477 | hsa-miR-148a-3p | SERPINE1 | 5054   | Luciferase reporter assay//Microarray//qRT-PCR                                | Functional MTI        | 21703006 |
| MIRT053478 | hsa-miR-148a-3p | ITGB8    | 3696   | Luciferase reporter assay//Microarray//qRT-PCR                                | Functional MTI        | 21703006 |
| MIRT053479 | hsa-miR-148a-3p | VAV2     | 7410   | Luciferase reporter assay//Microarray//qRT-PCR                                | Functional MTI        | 21703006 |
| MIRT053480 | hsa-miR-148a-3p | ITGA5    | 3678   | Luciferase reporter assay//Microarray//qRT-PCR                                | Functional MTI        | 21703006 |
| MIRT053483 | hsa-miR-148a-3p | ROCK1    | 6093   | Immunohistochemistry//Luciferase reporter assay//qRT-PCR//Western blot        | Functional MTI        | 21994419 |
| MIRT053518 | hsa-miR-148a-3p | RUNX3    | 864    | qRT-PCR//Western blot                                                         | Functional MTI        | 23549984 |
| MIRT053560 | hsa-miR-148a-3p | SMAD2    | 4087   | Luciferase reporter assay//qRT-PCR//Western blot                              | Functional MTI        | 23873106 |
| MIRT054115 | hsa-miR-148a-3p | UNKL     | 64718  | Microarray                                                                    | Functional MTI (Weak) | 22995316 |
| MIRT054388 | hsa-miR-148a-3p | MET      | 4233   | Immunoblot//Immunofluorescence//Immunohistochemistry//Luciferase reporter     | Functional MTI        | 24013226 |
| MIRT057492 | hsa-miR-148a-3p | CEP55    | 55165  | PAR-CLIP                                                                      | Functional MTI (Weak) | 21572407 |
| MIRT062708 | hsa-miR-148a-3p | MLEC     | 9761   | PAR-CLIP                                                                      | Functional MTI (Weak) | 21572407 |
| MIRT084562 | hsa-miR-148a-3p | BCL2L11  | 10018  | Immunoblot//Luciferase reporter assay//qRT-PCR                                | Functional MTI        | 24425048 |
| MIRT105304 | hsa-miR-148a-3p | VPS37A   | 137492 | PAR-CLIP                                                                      | Functional MTI (Weak) | 21572407 |
| MIRT130076 | hsa-miR-148a-3p | TXNIP    | 10628  | PAR-CLIP                                                                      | Functional MTI (Weak) | 24398324 |
| MIRT138426 | hsa-miR-148a-3p | KIF2C    | 11004  | PAR-CLIP                                                                      | Functional MTI (Weak) | 23592263 |
| MIRT152411 | hsa-miR-148a-3p | ARID3A   | 1820   | PAR-CLIP                                                                      | Functional MTI (Weak) | 23592263 |
| MIRT155749 | hsa-miR-148a-3p | SIK1     | 150094 | PAR-CLIP                                                                      | Functional MTI (Weak) | 23592263 |
| MIRT210293 | hsa-miR-148a-3p | ARL8B    | 55207  | PAR-CLIP                                                                      | Functional MTI (Weak) | 23592263 |
| MIRT218522 | hsa-miR-148a-3p | HLA-A    | 3105   | PAR-CLIP                                                                      | Functional MTI (Weak) | 23592263 |
| MIRT222270 | hsa-miR-148a-3p | CCT6A    | 908    | PAR-CLIP                                                                      | Functional MTI (Weak) | 21572407 |
| MIRT270936 | hsa-miR-148a-3p | GPRC5A   | 9052   | PAR-CLIP                                                                      | Functional MTI (Weak) | 23592263 |
| MIRT280554 | hsa-miR-148a-3p | GLRX5    | 51218  | PAR-CLIP                                                                      | Functional MTI (Weak) | 21572407 |
| MIRT281136 | hsa-miR-148a-3p | PDI3A    | 2923   | Luciferase reporter assay//qRT-PCR//Western blot                              | Functional MTI        | 26004124 |
| MIRT296526 | hsa-miR-148a-3p | STX16    | 8675   | PAR-CLIP                                                                      | Functional MTI (Weak) | 23592263 |
| MIRT301572 | hsa-miR-148a-3p | TNRC6B   | 23112  | PAR-CLIP                                                                      | Functional MTI (Weak) | 23592263 |
| MIRT347400 | hsa-miR-148a-3p | CEBPG    | 1054   | PAR-CLIP                                                                      | Functional MTI (Weak) | 20371350 |
| MIRT382244 | hsa-miR-148a-3p | SH3PXD2A | 9644   | PAR-CLIP                                                                      | Functional MTI (Weak) | 23592263 |
| MIRT399584 | hsa-miR-148a-3p | RBM38    | 55544  | PAR-CLIP                                                                      | Functional MTI (Weak) | 23592263 |
| MIRT437409 | hsa-miR-148a-3p | MAFB     | 9935   | Luciferase reporter assay                                                     | Functional MTI        | 23225151 |
| MIRT438088 | hsa-miR-148a-3p | ERRF1    | 54206  | Immunoblot//Luciferase reporter assay//qRT-PCR                                | Functional MTI        | 24425048 |
| MIRT438751 | hsa-miR-148a-3p | S1PR1    | 1901   | Immunohistochemistry//Luciferase reporter assay//qRT-PCR//Western blot        | Functional MTI        | 24798342 |
| MIRT438752 | hsa-miR-148a-3p | USP4     | 7375   | Immunohistochemistry//Luciferase reporter assay//qRT-PCR//Western blot        | Functional MTI        | 24798342 |
| MIRT453164 | hsa-miR-148a-3p | CNOT4    | 4850   | PAR-CLIP                                                                      | Functional MTI (Weak) | 23592263 |
| MIRT456196 | hsa-miR-148a-3p | ZDHHC6   | 64429  | PAR-CLIP                                                                      | Functional MTI (Weak) | 23592263 |
| MIRT458103 | hsa-miR-148a-3p | TTL1     | 25809  | PAR-CLIP                                                                      | Functional MTI (Weak) | 23592263 |
| MIRT459958 | hsa-miR-148a-3p | POC1A    | 25886  | PAR-CLIP                                                                      | Functional MTI (Weak) | 23592263 |
| MIRT461329 | hsa-miR-148a-3p | MRPS27   | 23107  | PAR-CLIP                                                                      | Functional MTI (Weak) | 23592263 |
| MIRT462848 | hsa-miR-148a-3p | B4GALT7  | 11285  | PAR-CLIP                                                                      | Functional MTI (Weak) | 23592263 |
| MIRT463247 | hsa-miR-148a-3p | ZIC5     | 85416  | PAR-CLIP                                                                      | Functional MTI (Weak) | 23592263 |
| MIRT464041 | hsa-miR-148a-3p | WASL     | 8976   | PAR-CLIP                                                                      | Functional MTI (Weak) | 23592263 |
| MIRT466869 | hsa-miR-148a-3p | STX6     | 10228  | PAR-CLIP                                                                      | Functional MTI (Weak) | 23592263 |
| MIRT467697 | hsa-miR-148a-3p | SLC38A2  | 54407  | PAR-CLIP                                                                      | Functional MTI (Weak) | 23592263 |
| MIRT468920 | hsa-miR-148a-3p | RPS6KA4  | 8986   | PAR-CLIP                                                                      | Functional MTI (Weak) | 23592263 |
| MIRT469506 | hsa-miR-148a-3p | RCC2     | 55920  | PAR-CLIP                                                                      | Functional MTI (Weak) | 23592263 |
| MIRT469815 | hsa-miR-148a-3p | RAB14    | 51552  | PAR-CLIP                                                                      | Functional MTI (Weak) | 23592263 |
| MIRT470329 | hsa-miR-148a-3p | PPP6R1   | 22870  | PAR-CLIP                                                                      | Functional MTI (Weak) | 23592263 |
| MIRT473770 | hsa-miR-148a-3p | MAP3K9   | 4293   | PAR-CLIP                                                                      | Functional MTI (Weak) | 23592263 |
| MIRT477363 | hsa-miR-148a-3p | EOGT     | 285203 | PAR-CLIP                                                                      | Functional MTI (Weak) | 23592263 |
| MIRT478215 | hsa-miR-148a-3p | DDX6     | 1656   | PAR-CLIP                                                                      | Functional MTI (Weak) | 23592263 |
| MIRT479812 | hsa-miR-148a-3p | CCNA2    | 890    | PAR-CLIP                                                                      | Functional MTI (Weak) | 23592263 |
| MIRT484939 | hsa-miR-148a-3p | ZFYVE26  | 23503  | PAR-CLIP                                                                      | Functional MTI (Weak) | 23592263 |
| MIRT485432 | hsa-miR-148a-3p | KLF6     | 1316   | PAR-CLIP                                                                      | Functional MTI (Weak) | 23592263 |
| MIRT485645 | hsa-miR-148a-3p | DICER1   | 23405  | PAR-CLIP                                                                      | Functional MTI (Weak) | 23592263 |
| MIRT487938 | hsa-miR-148a-3p | HLA-C    | 3107   | PAR-CLIP                                                                      | Functional MTI (Weak) | 23592263 |
| MIRT488937 | hsa-miR-148a-3p | ETV7     | 51513  | PAR-CLIP                                                                      | Functional MTI (Weak) | 23592263 |
| MIRT492821 | hsa-miR-148a-3p | PATL1    | 219988 | PAR-CLIP                                                                      | Functional MTI (Weak) | 23592263 |
| MIRT496749 | hsa-miR-148a-3p | PDIK1L   | 149420 | PAR-CLIP                                                                      | Functional MTI (Weak) | 22291592 |
| MIRT497883 | hsa-miR-148a-3p | SLC12A7  | 10723  | PAR-CLIP                                                                      | Functional MTI (Weak) | 22291592 |
| MIRT500918 | hsa-miR-148a-3p | STARD13  | 90627  | PAR-CLIP                                                                      | Functional MTI (Weak) | 24398324 |
| MIRT503176 | hsa-miR-148a-3p | AGO2     | 27161  | PAR-CLIP                                                                      | Functional MTI (Weak) | 24398324 |
| MIRT505102 | hsa-miR-148a-3p | YWHAB    | 7529   | PAR-CLIP                                                                      | Functional MTI (Weak) | 23446348 |
| MIRT505256 | hsa-miR-148a-3p | UBE2D3   | 7323   | PAR-CLIP                                                                      | Functional MTI (Weak) | 23446348 |
| MIRT511220 | hsa-miR-148a-3p | LNPEP    | 4012   | PAR-CLIP                                                                      | Functional MTI (Weak) | 23446348 |
| MIRT513209 | hsa-miR-148a-3p | RFT1     | 91869  | PAR-CLIP                                                                      | Functional MTI (Weak) | 23446348 |
| MIRT513617 | hsa-miR-148a-3p | VPS37B   | 79720  | PAR-CLIP                                                                      | Functional MTI (Weak) | 23446348 |
| MIRT522804 | hsa-miR-148a-3p | KPNA4    | 3840   | PAR-CLIP                                                                      | Functional MTI (Weak) | 23446348 |
| MIRT525443 | hsa-miR-148a-3p | RBM23    | 55147  | PAR-CLIP                                                                      | Functional MTI (Weak) | 22012620 |
| MIRT530302 | hsa-miR-148a-3p | AKAP17A  | 8227   | PAR-CLIP                                                                      | Functional MTI (Weak) | 22012620 |
| MIRT531689 | hsa-miR-148a-3p | MYO3A    | 53904  | PAR-CLIP                                                                      | Functional MTI (Weak) | 22012620 |
| MIRT537300 | hsa-miR-148a-3p | FZD5     | 7855   | PAR-CLIP                                                                      | Functional MTI (Weak) | 22012620 |
| MIRT541199 | hsa-miR-148a-3p | HSP90AA1 | 3320   | PAR-CLIP                                                                      | Functional MTI (Weak) | 21572407 |
| MIRT544732 | hsa-miR-148a-3p | NDRG1    | 10397  | PAR-CLIP                                                                      | Functional MTI (Weak) | 21572407 |
| MIRT549174 | hsa-miR-148a-3p | BMP3     | 651    | PAR-CLIP                                                                      | Functional MTI (Weak) | 21572407 |
| MIRT549231 | hsa-miR-148a-3p | BAZ2B    | 29994  | PAR-CLIP                                                                      | Functional MTI (Weak) | 21572407 |
| MIRT551864 | hsa-miR-148a-3p | ASB6     | 140459 | PAR-CLIP                                                                      | Functional MTI (Weak) | 21572407 |

|            |                 |          |        |                                                                             |                       |          |
|------------|-----------------|----------|--------|-----------------------------------------------------------------------------|-----------------------|----------|
| MIRT559687 | hsa-miR-148a-3p | AGO3     | 192669 | PAR-CLIP                                                                    | Functional MTI (Weak) | 21572407 |
| MIRT561658 | hsa-miR-148a-3p | RNF219   | 79596  | PAR-CLIP                                                                    | Functional MTI (Weak) | 20371350 |
| MIRT561856 | hsa-miR-148a-3p | NPTX1    | 4884   | PAR-CLIP                                                                    | Functional MTI (Weak) | 20371350 |
| MIRT565733 | hsa-miR-148a-3p | SESN3    | 143686 | PAR-CLIP                                                                    | Functional MTI (Weak) | 20371350 |
| MIRT566568 | hsa-miR-148a-3p | OTUD4    | 54726  | PAR-CLIP                                                                    | Functional MTI (Weak) | 20371350 |
| MIRT567186 | hsa-miR-148a-3p | IGFBP5   | 3488   | PAR-CLIP                                                                    | Functional MTI (Weak) | 20371350 |
| MIRT567834 | hsa-miR-148a-3p | DCUN1D3  | 123879 | PAR-CLIP                                                                    | Functional MTI (Weak) | 20371350 |
| MIRT574794 | hsa-miR-148a-3p | FAM104A  | 84923  | PAR-CLIP                                                                    | Functional MTI (Weak) | 20371350 |
| MIRT610545 | hsa-miR-148a-3p | WNT2B    | 7482   | HITS-CLIP                                                                   | Functional MTI (Weak) | 23824327 |
| MIRT613042 | hsa-miR-148a-3p | FOXP1    | 27086  | HITS-CLIP                                                                   | Functional MTI (Weak) | 23824327 |
| MIRT615073 | hsa-miR-148a-3p | COLEC12  | 81035  | HITS-CLIP                                                                   | Functional MTI (Weak) | 23824327 |
| MIRT617481 | hsa-miR-148a-3p | AP5B1    | 91056  | HITS-CLIP                                                                   | Functional MTI (Weak) | 23824327 |
| MIRT622753 | hsa-miR-148a-3p | PHACTR2  | 9749   | HITS-CLIP                                                                   | Functional MTI (Weak) | 23824327 |
| MIRT625516 | hsa-miR-148a-3p | PLPP4    | 196051 | HITS-CLIP                                                                   | Functional MTI (Weak) | 23824327 |
| MIRT628641 | hsa-miR-148a-3p | ABLIM1   | 3983   | HITS-CLIP                                                                   | Functional MTI (Weak) | 23824327 |
| MIRT630234 | hsa-miR-148a-3p | SORD     | 6652   | HITS-CLIP                                                                   | Functional MTI (Weak) | 23824327 |
| MIRT635946 | hsa-miR-148a-3p | PLA2G12A | 81579  | HITS-CLIP                                                                   | Functional MTI (Weak) | 23824327 |
| MIRT646776 | hsa-miR-148a-3p | IL23R    | 149233 | HITS-CLIP                                                                   | Functional MTI (Weak) | 23824327 |
| MIRT648163 | hsa-miR-148a-3p | CHRFAM7A | 89832  | HITS-CLIP                                                                   | Functional MTI (Weak) | 23824327 |
| MIRT653244 | hsa-miR-148a-3p | SOS2     | 6655   | HITS-CLIP                                                                   | Functional MTI (Weak) | 23824327 |
| MIRT661182 | hsa-miR-148a-3p | S1PR2    | 9294   | HITS-CLIP                                                                   | Functional MTI (Weak) | 23824327 |
| MIRT693234 | hsa-miR-148a-3p | KIAA0907 | 22889  | HITS-CLIP                                                                   | Functional MTI (Weak) | 23313552 |
| MIRT693776 | hsa-miR-148a-3p | VGLL2    | 245806 | HITS-CLIP                                                                   | Functional MTI (Weak) | 23313552 |
| MIRT702589 | hsa-miR-148a-3p | JARID2   | 3720   | HITS-CLIP                                                                   | Functional MTI (Weak) | 23313552 |
| MIRT715175 | hsa-miR-148a-3p | DTX4     | 23220  | HITS-CLIP                                                                   | Functional MTI (Weak) | 19536157 |
| MIRT722871 | hsa-miR-148a-3p | FAM212B  | 55924  | HITS-CLIP                                                                   | Functional MTI (Weak) | 19536157 |
| MIRT723139 | hsa-miR-148a-3p | YPEL1    | 29799  | HITS-CLIP                                                                   | Functional MTI (Weak) | 19536157 |
| MIRT723186 | hsa-miR-148a-3p | OVOL1    | 5017   | HITS-CLIP                                                                   | Functional MTI (Weak) | 19536157 |
| MIRT732353 | hsa-miR-148a-3p | WNT1     | 7471   | Immunohistochemistry//In situ hybridization//Luciferase reporter assay//qRT | Functional MTI        | 28199399 |
| MIRT732362 | hsa-miR-148a-3p | STAT3    | 6774   | Luciferase reporter assay//qRT-PCR//Western blot                            | Functional MTI        | 28280370 |
| MIRT732662 | hsa-miR-148a-3p | ALCAM    | 214    | Luciferase reporter assay//qRT-PCR//Western blot                            | Functional MTI        | 28063929 |
| MIRT732882 | hsa-miR-148a-3p | INO80    | 54617  | Luciferase reporter assay//Western blot                                     | Functional MTI        | 27764804 |
| MIRT733135 | hsa-miR-148a-3p | TGFB2    | 7042   | Flow//Immunofluorescence//Luciferase reporter assay//qRT-PCR//Western b     | Functional MTI        | 26983401 |
| MIRT733211 | hsa-miR-148a-3p | IKBKB    | 3551   | Luciferase reporter assay//Microarray//Next Generation Sequencing (NGS)//   | Functional MTI        | 25630970 |
| MIRT734355 | hsa-miR-148a-3p | BAX      | 581    | Luciferase reporter assay//qRT-PCR//Western blot                            | Functional MTI        | 27261578 |
| MIRT735024 | hsa-miR-148a-3p | QKI      | 9444   | Luciferase reporter assay                                                   | Functional MTI        | 25971746 |
| MIRT735317 | hsa-miR-148a-3p | NRP1     | 8829   | Immunohistochemistry//Luciferase reporter assay//qRT-PCR//Western blot      | Functional MTI        | 26097868 |
| MIRT737664 | hsa-miR-148a-3p | APLP2    | 334    | PAR-CLIP                                                                    | Functional MTI (Weak) | 26701625 |
| MIRT737665 | hsa-miR-148a-3p | CDKN1A   | 1026   | PAR-CLIP                                                                    | Functional MTI (Weak) | 26701625 |
| MIRT737666 | hsa-miR-148a-3p | CSNK2A1  | 1457   | PAR-CLIP                                                                    | Functional MTI (Weak) | 26701625 |
| MIRT737667 | hsa-miR-148a-3p | FURIN    | 5045   | PAR-CLIP                                                                    | Functional MTI (Weak) | 26701625 |
| MIRT737668 | hsa-miR-148a-3p | FXR1     | 8087   | PAR-CLIP                                                                    | Functional MTI (Weak) | 26701625 |
| MIRT737669 | hsa-miR-148a-3p | KIAA1456 | 57604  | PAR-CLIP                                                                    | Functional MTI (Weak) | 26701625 |
| MIRT737670 | hsa-miR-148a-3p | PHLDB2   | 90102  | PAR-CLIP                                                                    | Functional MTI (Weak) | 26701625 |
| MIRT737671 | hsa-miR-148a-3p | PPARD    | 5467   | PAR-CLIP                                                                    | Functional MTI (Weak) | 26701625 |
| MIRT737672 | hsa-miR-148a-3p | RALY     | 22913  | PAR-CLIP                                                                    | Functional MTI (Weak) | 26701625 |
| MIRT762747 | hsa-miR-148a-3p | ARL6IP1  | 23204  | PAR-CLIP                                                                    | Functional MTI (Weak) | 27292025 |
| MIRT762748 | hsa-miR-148a-3p | KDM6B    | 23135  | PAR-CLIP                                                                    | Functional MTI (Weak) | 27292025 |
| MIRT762749 | hsa-miR-148a-3p | LDLR     | 3949   | PAR-CLIP                                                                    | Functional MTI (Weak) | 27292025 |
| MIRT762750 | hsa-miR-148a-3p | MCFD2    | 90411  | PAR-CLIP                                                                    | Functional MTI (Weak) | 27292025 |
| MIRT762751 | hsa-miR-148a-3p | NEURL4   | 84461  | PAR-CLIP                                                                    | Functional MTI (Weak) | 27292025 |
| MIRT762752 | hsa-miR-148a-3p | TMEM246  | 84302  | PAR-CLIP                                                                    | Functional MTI (Weak) | 27292025 |
| MIRT790121 | hsa-miR-148a-3p | APLN     | 8862   | HITS-CLIP                                                                   | Functional MTI (Weak) | 28735896 |
