# Supplementary material for: Integrated MicroRNA Expression Profile Reveals Dysregulated miR‐20a‐5p and miR‐200a‐3p in Liver Fibrosis
Source: Hindawi journal article supplement (doi:10.1155/2021/9583932), 2021-01-01
Supplement: f2 [file 9583932.f2.pdf]

| Category  | Term                                                                                  | Count | %          | PValue   | Genes                                     | List Total | Pop Hits | Pop Total | Fold Enrichment | Benfactors  | Benamins    | FDR         |
|-----------|---------------------------------------------------------------------------------------|-------|------------|----------|-------------------------------------------|------------|----------|-----------|-----------------|-------------|-------------|-------------|
| GOTERM BP | DIRECT GO004594--negative regulation of transcription from RNA polymerase II promoter | 70    | 15.11879   | 8.36E-15 | CNCT2, ZNF292, THRB, FOXA2, ZBK1, M       | 427        | 981      | 16792     | 2.806192839     | 2.33E-11    | 2.33E-11    | 1.49E-11    |
| GOTERM BP | DIRECT GO003106--negative regulation of apoptotic process                             | 70    | 8.423248   | 1.17E-10 | MDTH, MCL1, XIAP, TRAF, FOXO1, PTEN,      | 427        | 981      | 16792     | 2.707594181     | 2.7E-07     | 1.64E-07    | 2.09E-07    |
| GOTERM BP | DIRECT GO000122--positive regulation of transcription from RNA polymerase II promoter | 50    | 10.799136  | 3.07E-10 | BMI1, THRB, FGF9, MITF, DICER1, EBH1, M   | 427        | 720      | 16792     | 2.703993397     | 8.58E-07    | 2.80E-07    | 5.48E-07    |
| GOTERM BP | DIRECT GO004893--positive regulation of transcription, DNA-templated                  | 41    | 8.852919   | 3.32E-10 | FOXA2, FOXA2, CRLF3, MITF, FOXO1, FOX     | 427        | 515      | 16792     | 3.137701905     | 9.28E-07    | 1.23E-07    | 5.93E-07    |
| GOTERM BP | DIRECT GO000828--positive regulation of cell proliferation                            | 35    | 5.1599252  | 3.53E-08 | EFZF3, FGF9, BTG, PTEN, IL13RA, TGFBR     | 427        | 466      | 16792     | 2.953633979     | 9.87E-05    | 1.97E-05    | 6.31E-05    |
| GOTERM BP | DIRECT GO000285--negative regulation of cell proliferation                            | 29    | 6.263489   | 1.10E-06 | DLCL1, CYP11B, BAP1, ZEB1, SRF, PTEN, A   | 427        | 396      | 16792     | 2.871899        | 0.00368831  | 4.43E-04    | 0.001963875 |
| GOTERM BP | DIRECT GO007265--RAS protein signal transduction                                      | 12    | 2.5917927  | 1.39E-06 | PLD1, CYP11A, KRAS, CRKL, RRG, F3, MA     | 427        | 70       | 16792     | 6.78518903      | 0.003869596 | 4.80E-04    | 0.002737527 |
| GOTERM BP | DIRECT GO0010628--positive regulation of gene expression                              | 12    | 4.75101628 | 1.39E-06 | BCR4L3, RFX4, POU5F1, MITF, TCF7L2, R     | 427        | 60       | 16792     | 2.320144583     | 0.00222402  | 0.00022402  | 0.000463992 |
| GOTERM BP | DIRECT GO000636--transcription from RNA polymerase II promoter                        | 12    | 6.9114471  | 7.75E-06 | CNCT2, ZNF292, MITF, DREK, NR3C1, FO      | 427        | 513      | 16792     | 2.453043312     | 0.021426216 | 0.002165655 | 0.018863437 |
| GOTERM BP | DIRECT GO001666--response to hypoxia                                                  | 17    | 3.6717063  | 8.16E-06 | LDHA, CYP11A, ACTN2, CREB1, SMAD4, P      | 427        | 172      | 16792     | 3.886825336     | 0.022550738 | 0.002071388 | 0.014573055 |
| GOTERM BP | DIRECT GO0016032--viral process                                                       | 23    | 4.9676026  | 8.41E-06 | VAC14, RCR1, KRAS, RBLM3, TP53, AC        | 427        | 299      | 16792     | 3.025400533     | 0.023237681 | 0.001957409 | 0.015022026 |
| GOTERM BP | DIRECT GO0049537--transcription from RNA polymerase II promoter                       | 29    | 6.263489   | 1.05E-05 | MDM1, RFX4, POU5F1, MITF, ZEB1, FOX       | 427        | 441      | 16792     | 2.584012383     | 0.023966363 | 0.002186457 | 0.015013136 |
| GOTERM BP | DIRECT GO0007173--epidermal growth factor receptor signaling pathway                  | 10    | 2.1967022  | 1.05E-05 | EGFR, PDK1, KRAS, PDK3, GRB2, PI3         | 427        | 56       | 16792     | 7.022415524     | 0.029024198 | 0.002101626 | 0.018818474 |
| GOTERM BP | DIRECT GO0007050--cell cycle arrest                                                   | 15    | 3.2397408  | 1.43E-05 | TP53, SMAD3, CDK6, TCF7L2, TGFBR2, N      | 427        | 141      | 16792     | 4.183566605     | 0.039902111 | 0.002678486 | 0.025475378 |
| GOTERM BP | DIRECT GO0007136--cellular response to epidermal growth factor stimulus               | 8     | 1.7278618  | 1.55E-05 | ZFP641, EGFR, BAG1, PDK1, FGF9, GRB2, PI3 | 427        | 33       | 16792     | 9.534461074     | 0.165317588 | 0.002711812 | 0.02757912  |
| GOTERM BP | DIRECT GO0007001--phosphatidylinositol-mediated signaling                             | 12    | 2.8077554  | 1.56E-05 | EGFR, RAS, PDK1, FGF9, GRB2, PI3K         | 427        | 106      | 16792     | 4.82941982      | 0.04256915  | 0.022559927 | 0.02789488  |
| GOTERM BP | DIRECT GO0001837--epithelial to mesenchymal transition                                | 8     | 1.2727618  | 1.91E-05 | NOTCH1, GSK3B, FOXM1, HGF, SNAI2, CI      | 427        | 34       | 16792     | 9.25306516      | 0.052119849 | 0.002969317 | 0.034196239 |
| GOTERM BP | DIRECT GO0001701--in utero embryonic development                                      | 17    | 3.6717063  | 2.33E-05 | GNAL3, SMAD4, GJA1, SMAD2, KEAP1, S       | 427        | 187      | 16792     | 3.575047903     | 0.063152608 | 0.003427532 | 0.0416721   |
| GOTERM BP | DIRECT GO0000974--cellular response to DNA damage stimulus                            | 18    | 3.887689   | 2.36E-05 | XIAP, CENPL, TP53BP1, ZMAT3, TP53, FG     | 427        | 208      | 16792     | 3.4031706       | 0.063931543 | 0.00297883  | 0.020524772 |
| GOTERM BP | DIRECT GO0030770--DNA damage response, signal transduction by p53 class mediator      | 19    | 4.295898   | 2.50E-05 | SIHX2, TP53, DRB1, FOXO3, MDM2, S         | 427        | 15       | 16792     | 1.73021077      | 0.067467206 | 0.00322071  | 0.044422458 |
| GOTERM BP | DIRECT GO0007145--cellular response to hypoxia                                        | 12    | 2.5917927  | 3.13E-05 | ZFP641, DNMT3A, ERO1A, GATA6, BC          | 427        | 96       | 16792     | 4.915908607     | 0.083812469 | 0.003970923 | 0.020551572 |
| GOTERM BP | DIRECT GO0001571--positive regulation of histone H3-K4 methylation                    | 6     | 1.2958963  | 4.94E-05 | SMAD4, DNMT1, OGT, MYB, DNMT3B, T         | 427        | 17       | 16792     | 13.87959774     | 0.12891784  | 0.005982858 | 0.058150639 |
| GOTERM BP | DIRECT GO0008283--cell proliferation                                                  | 24    | 5.1835853  | 6.46E-05 | EGFR, MORF4L1, CDV3, PLAGL1, FSCN1,       | 427        | 366      | 16792     | 2.57823708      | 0.165314435 | 0.007509002 | 0.12394827  |
| GOTERM BP | DIRECT GO0001407--angiogenesis                                                        | 8     | 1.2397408  | 8.28E-05 | EGFR, MORF4L1, CDV3, PLAGL1, FSCN1,       | 427        | 172      | 16792     | 4.29251767      | 0.30028248  | 0.01827585  | 0.22484524  |
| GOTERM BP | DIRECT GO0008286--insulin receptor signaling pathway                                  | 10    | 2.1967022  | 1.55E-04 | IGF1R, EIF4E2P2, GRB2, PI3K2A, ATP2       | 427        | 78       | 16792     | 5.041734222     | 0.35186477  | 0.01654574  | 0.2768012   |
| GOTERM BP | DIRECT GO0010718--positive regulation of epithelial to mesenchymal transition         | 7     | 1.511879   | 1.59E-04 | NOTCH1, EGFR, SMAD3, SMAD4, SMAD2,        | 427        | 33       | 16792     | 8.41377844      | 0.359609749 | 0.016370576 | 0.2048381   |
| GOTERM BP | DIRECT GO0004997--DNA damage response, signal transduction by p53 class mediator res  | 9     | 1.943845   | 1.64E-04 | TNKS1BP1, CDKN1A, CDKN2C, EP300, N        | 427        | 62       | 16792     | 5.908544252     | 0.367281782 | 0.016216099 | 0.20246871  |
| GOTERM BP | DIRECT GO0004997--DNA damage response, signal transduction by p53 class mediator res  | 12    | 4.5917927  | 1.64E-04 | PHLPP1, MCL1, PDK1, PLG1, GJA1, GAT       | 427        | 115      | 16792     | 4.055332361     | 0.365834097 | 0.01708234  | 0.1931477   |
| GOTERM BP | DIRECT GO0007192--extrinsic apoptotic signaling pathway in absence of ligand          | 7     | 1.511879   | 1.89E-04 | MCL1, BCL2, GSK3B, MKNK2, EP300, C        | 427        | 34       | 16792     | 8.964632015     | 0.41128317  | 0.01750365  | 0.37888256  |
| GOTERM BP | DIRECT GO0035924--cellular response to vascular endothelial growth factor stimulus    | 6     | 1.2958963  | 2.37E-04 | VCAM1, NOTCH1, FLT1, MAPK14, VEGFR        | 427        | 23       | 16792     | 10.28838311     | 0.484161208 | 0.021127206 | 0.402277563 |
| GOTERM BP | DIRECT GO0035924--cellular response to vascular endothelial growth factor stimulus    | 12    | 4.5917927  | 2.50E-04 | SIHX2, TP53, DRB1, FOXO3, MDM2, S         | 427        | 115      | 16792     | 4.055332361     | 0.365834097 | 0.01708234  | 0.1931477   |
| GOTERM BP | DIRECT GO0030335--positive regulation of cell migration                               | 15    | 3.2397408  | 2.59E-04 | EGFR, FLT1, ACTN2, PDXL, SMAD3, H         | 427        | 184      | 16792     | 2.88385848      | 0.51578531  | 0.021236847 | 0.462235958 |
| GOTERM BP | DIRECT GO0006915--apoptotic process                                                   | 30    | 6.4794816  | 2.87E-04 | DLCL1, PHLPP1, XIAP, CARD11, STK17B, F    | 427        | 567      | 16792     | 2.08071511      | 0.522500207 | 0.02352673  | 0.51203577  |
| GOTERM BP | DIRECT GO0038128--ERBB2 signaling pathway                                             | 7     | 1.511879   | 3.15E-04 | EGFR, CUL5, KRAS, GRB2, EBI3, ERBIN, S    | 427        | 38       | 16792     | 7.244176014     | 0.614570578 | 0.028117089 | 0.605758287 |
| GOTERM BP | DIRECT GO0179154--cytoskeletal protein phosphorylation                                | 12    | 2.5917927  | 3.92E-04 | PHLPP1, MCL1, PDK1, PLG1, GJA1, GAT       | 427        | 115      | 16792     | 4.055332361     | 0.365834097 | 0.01708234  | 0.1931477   |
| GOTERM BP | DIRECT GO0004134--positive regulation of fibroblast proliferation                     | 8     | 1.2727618  | 4.07E-04 | BMI1, EGFR, WNT1, CDKN1A, JUN, BIC        | 427        | 54       | 16792     | 8.26039039      | 0.679955129 | 0.030242945 | 0.75237343  |
| GOTERM BP | DIRECT GO0030306--actin cytoskeleton organization                                     | 12    | 2.5917927  | 4.78E-04 | DLCL1, PEN1, RND3, SMAD1, F3LN, PDI       | 427        | 130      | 16792     | 3.63040864      | 0.67558706  | 0.0439368   | 0.81189932  |
| GOTERM BP | DIRECT GO0032355--response to estradiol                                               | 12    | 2.1967022  | 4.99E-04 | DNMT3A, CDKN1B, ETS1, EZH2, MBD4, J       | 427        | 91       | 16792     | 4.321484676     | 0.75237343  | 0.053157648 | 0.88792746  |
| GOTERM BP | DIRECT GO0001570--vasculogenesis                                                      | 8     | 1.2727618  | 6.23E-04 | ZFP641, VEGFA, GJA1, ZEB1, YAP1, EP       | 427        | 104      | 16792     | 3.61791244      | 0.87646615  | 0.01827585  | 0.22484524  |
| GOTERM BP | DIRECT GO0001889--liver development                                                   | 9     | 1.943845   | 5.60E-04 | NOTCH1, KRAS, CADM1, GATA6, BC            | 427        | 74       | 16792     | 4.78283457      | 0.9127602   | 0.037491047 | 0.999607271 |
| GOTERM BP | DIRECT GO004570--positive regulation of DNA replication                               | 7     | 1.511879   | 6.23E-04 | EGFR, IGF1R, JUN, NPAT, SHL1, AREG, A     | 427        | 42       | 16792     | 6.52442849      | 0.82744727  | 0.040620281 | 1.166992039 |
| GOTERM BP | DIRECT GO0008584--male zoonid development                                             | 10    | 2.1967022  | 6.34E-04 | FGF9, GATRA4, BCL2, GATA4, HOXA9, M       | 427        | 94       | 16792     | 4.183566605     | 0.83060958  | 0.004379848 | 1.102992079 |
| GOTERM BP | DIRECT GO003106--negative regulation of apoptotic process                             | 4     | 1.0316717  | 8.91E-04 | PHLPP1, MCL1, PDK1, PLG1, GJA1, GAT       | 427        | 79       | 16792     | 2.496619312     | 0.852763629 | 0.01708234  | 0.21403222  |
| GOTERM BP | DIRECT GO0030336--negative regulation of cell migration                               | 10    | 2.1967022  | 6.85E-04 | RECK, DLCL1, CYP11B, RAP2B, BCL2, P       | 427        | 95       | 16792     | 4.139259151     | 0.852466059 | 0.041661027 | 1.2611299   |
| GOTERM BP | DIRECT GO0050821--protein stabilization                                               | 12    | 2.5917927  | 7.00E-04 | PNP1, CDKN1A, FBXW7, EP300, PBE2, C       | 427        | 136      | 16792     | 8.99899435      | 0.888896263 | 0.041679748 | 1.2149139   |
| GOTERM BP | DIRECT GO0008111--negative regulation of anionics                                     | 5     | 1.0799136  | 7.48E-04 | NOTCH1, MCL1, BCL2, FDKS, SNAI2           | 427        | 17       | 16792     | 11.56633147     | 0.87646615  | 0.04351917  | 1.32746055  |
| GOTERM BP | DIRECT GO0001701--in utero embryonic development                                      | 17    | 3.6717063  | 8.41E-04 | PHLPP1, MCL1, PDK1, PLG1, GJA1, GAT       | 427        | 115      | 16792     | 4.055332361     | 0.365834097 | 0.01708234  | 0.1931477   |
| GOTERM BP | DIRECT GO0045892--negative regulation of transcription, DNA-templated                 | 26    | 6.155508   | 0.001002 | TP53BP1, MAPK14, BRIP1, CKE2, RAD1        | 427        | 499      | 16792     | 2.490525361     | 0.933785816 | 0.033495811 | 0.51578531  |
| GOTERM BP | DIRECT GO0000771--intrinsic apoptotic signaling pathway in response to DNA damage     | 6     | 1.2958963  | 0.001017 | CDKN1A, EP300, TP53, CHEK2, PMAIP1, I     | 427        | 31       | 16792     | 7.11392309      | 0.940995228 | 0.01791194  | 1.792109664 |
| GOTERM BP | DIRECT GO0007147--cellular response to ionizing radiation                             | 6     | 1.2958963  | 0.001017 | CDKN1A, GRB2, MAPK14, TP53, SNAI2, C      | 427        | 31       | 16792     | 7.11392309      | 0.940995228 | 0.02597114  | 1.912109664 |
| GOTERM BP | DIRECT GO003106--negative regulation of apoptotic process                             | 15    | 3.2397408  | 0.001294 | NOTCH1, MCL1, PDK1, PLG1, GJA1, GAT       | 427        | 115      | 16792     | 4.055332361     | 0.365834097 | 0.01708234  | 0.1931477   |
| GOTERM BP | DIRECT GO0007129--cellular response to amino acid stimulus                            | 7     | 1.511879   | 0.001458 | EGFR, DNMT3A, DPC1, DNMT1, ZEB1, S        | 427        | 47       | 16792     | 5.85993733      | 0.959462322 | 0.057634    | 0.202381873 |
| GOTERM BP | DIRECT GO0006915--apoptotic process                                                   | 9     | 1.943845   | 0.001202 | TNFRSF10A, ILPS, DNMT1, TNFRSF10          | 427        | 83       | 16792     | 4.264213764     | 0.967663662 | 0.059656468 | 1.2128715   |
| GOTERM BP | DIRECT GO0006915--apoptotic process                                                   | 30    | 6.4794816  | 0.001202 | TNFRSF10A, ILPS, DNMT1, TNFRSF10          | 427        | 567      | 16792     | 2.08071511      | 0.522500207 | 0.02352673  | 0.51203577  |
| GOTERM BP | DIRECT GO0038128--ERBB2 signaling pathway                                             | 7     | 1.511879   | 3.15E-04 | EGFR, CUL5, KRAS, GRB2, EBI3, ERBIN, S    | 427        | 38       | 16792     | 7.244176014     | 0.614570578 | 0.028117089 | 0.605758287 |
| GOTERM BP | DIRECT GO0179154--cytoskeletal protein phosphorylation                                | 12    | 2.5917927  | 3.92E-04 | PHLPP1, MCL1, PDK1, PLG1, GJA1, GAT       | 427        | 115      | 16792     | 4.055332361     | 0.365834097 | 0.01708234  | 0.1931477   |
| GOTERM BP | DIRECT GO0004134--positive regulation of fibroblast proliferation                     | 8     | 1.2727618  | 4.07E-04 | BMI1, EGFR, WNT1, CDKN1A, JUN, BIC        | 427        | 54       | 16792     | 8.26039039      | 0.679955129 | 0.030242945 | 0.75237343  |
| GOTERM BP | DIRECT GO0030306--actin cytoskeleton organization                                     | 12    | 2.5917927  | 4.78E-04 | DLCL1, PEN1, RND3, SMAD1, F3LN, PDI       | 427        | 130      | 16792     | 3.63040864      | 0.67558706  | 0.0439368   | 0.81189932  |
| GOTERM BP | DIRECT GO0032355--response to estradiol                                               | 12    | 2.1967022  | 4.99E-04 | DNMT3A, CDKN1B, ETS1, EZH2, MBD4, J       | 427        | 91       | 16792     | 4.321484676     | 0.75237343  | 0.053157648 | 0.88792746  |
| GOTERM BP | DIRECT GO0001570--vasculogenesis                                                      | 8     | 1.2727618  | 6.23E-04 | ZFP641, VEGFA, GJA1, ZEB1, YAP1, EP       | 427        | 104      | 16792     | 3.61791244      | 0.87646615  | 0.01827585  | 0.22484524  |
| GOTERM BP | DIRECT GO0001889--liver development                                                   | 9     | 1.943845   | 5.60E-04 | NOTCH1, KRAS, CADM1, GATA6, BC            | 427        | 74       | 16792     | 4.78283457      | 0.9127602   | 0.037491047 | 0.999607271 |
| GOTERM BP | DIRECT GO004570--positive regulation of DNA replication                               | 7     | 1.511879   | 6.23E-04 | EGFR, IGF1R, JUN, NPAT, SHL1, AREG, A     | 427        | 42       | 16792     | 6.52442849      | 0.82744727  | 0.040620281 | 1.166992039 |
| GOTERM BP | DIRECT GO0008584--male zoonid development                                             | 10    | 2.1967022  | 6.34E-04 | FGF9, GATRA4, BCL2                        |            |          |           |                 |             |             |             |

|        |    |        |                                                                                  |    |           |           |                                                                                                                                                                                                                                                                                                                                                                                                                                                                                                                                                                                                                                                                                                                                                                                                                                                                                                                                                                                                                                                                 |     |       |             |              |             |              |
|--------|----|--------|----------------------------------------------------------------------------------|----|-----------|-----------|-----------------------------------------------------------------------------------------------------------------------------------------------------------------------------------------------------------------------------------------------------------------------------------------------------------------------------------------------------------------------------------------------------------------------------------------------------------------------------------------------------------------------------------------------------------------------------------------------------------------------------------------------------------------------------------------------------------------------------------------------------------------------------------------------------------------------------------------------------------------------------------------------------------------------------------------------------------------------------------------------------------------------------------------------------------------|-----|-------|-------------|--------------|-------------|--------------|
| GOTERM | BP | DIRECT | GO:0001658--branching involved in ureteric bud morphogenesis                     | 5  | 1.0799136 | 0.021394  | WNT1, LHX1, BCL2, SMAD4, CTNWB1                                                                                                                                                                                                                                                                                                                                                                                                                                                                                                                                                                                                                                                                                                                                                                                                                                                                                                                                                                                                                                 | 427 | 42    | 16792       | 4.681610349  | 1.026303109 | 32.0476115   |
| GOTERM | BP | DIRECT | GO:0045123--positive regulation of I-kappaB kinase-NF-kappaB signaling           | 10 | 2.1598272 | 0.0217992 | MTDH, TNFRSF10B, MAP3K3, TRIM8, TBK1                                                                                                                                                                                                                                                                                                                                                                                                                                                                                                                                                                                                                                                                                                                                                                                                                                                                                                                                                                                                                            | 427 | 161   | 16792       | 2.442579913  | 1.036400591 | 32.5485456   |
| GOTERM | BP | DIRECT | GO:0071070--cytoskeleton organization                                            | 7  | 1.1598272 | 0.0217992 | YEATS4, PNM3, BRWD1, WASF3, TUBB                                                                                                                                                                                                                                                                                                                                                                                                                                                                                                                                                                                                                                                                                                                                                                                                                                                                                                                                                                                                                                | 427 | 161   | 16792       | 2.442579913  | 1.036400591 | 32.5485456   |
| GOTERM | BP | DIRECT | GO:0006338--chromatin remodeling                                                 | 7  | 1.511879  | 0.0220654 | MORF4L1, ATXN1, SRSB, SMARCD3, TRIM7                                                                                                                                                                                                                                                                                                                                                                                                                                                                                                                                                                                                                                                                                                                                                                                                                                                                                                                                                                                                                            | 427 | 86    | 16792       | 3.200914983  | 1.036786841 | 32.5485456   |
| GOTERM | BP | DIRECT | GO:0045648--positive regulation of erythrocyte differentiation                   | 4  | 0.8639309 | 0.0221001 | ACVR1B, ETS1, MAPK14, FOXO3                                                                                                                                                                                                                                                                                                                                                                                                                                                                                                                                                                                                                                                                                                                                                                                                                                                                                                                                                                                                                                     | 427 | 24    | 16792       | 6.524544489  | 1.036447858 | 32.91821221  |
| GOTERM | BP | DIRECT | GO:0048570--cell motility                                                        | 4  | 0.8639309 | 0.0221001 | PLD1, ETS1, FSCN1, EPHA2                                                                                                                                                                                                                                                                                                                                                                                                                                                                                                                                                                                                                                                                                                                                                                                                                                                                                                                                                                                                                                        | 427 | 24    | 16792       | 6.524544489  | 1.036447858 | 32.91821221  |
| GOTERM | BP | DIRECT | GO:0096090--negative regulation of canonical Wnt signaling pathway               | 10 | 1.5982709 | 0.0233918 | CYLD, NOTCH1, PSMAD1, MAPK14, GSK3                                                                                                                                                                                                                                                                                                                                                                                                                                                                                                                                                                                                                                                                                                                                                                                                                                                                                                                                                                                                                              | 427 | 161   | 16792       | 2.412609091  | 1.026303109 | 36.6767853   |
| GOTERM | BP | DIRECT | GO:0010629--negative regulation of gene expression                               | 9  | 1.9438445 | 0.0236627 | ACVR1B, CDKN1A, TBK1, CREB1, GJA1,                                                                                                                                                                                                                                                                                                                                                                                                                                                                                                                                                                                                                                                                                                                                                                                                                                                                                                                                                                                                                              | 427 | 137   | 16792       | 2.583428777  | 1.037944374 | 34.74145165  |
| GOTERM | BP | DIRECT | GO:2000134--regulatory regulation of G1/S transition of mitotic cell cycle       | 4  | 0.8639309 | 0.0246521 | CDKN1A, BCL2, E2F1, PTEN                                                                                                                                                                                                                                                                                                                                                                                                                                                                                                                                                                                                                                                                                                                                                                                                                                                                                                                                                                                                                                        | 427 | 25    | 16792       | 6.290820439  | 1.039041216 | 35.97774174  |
| GOTERM | BP | DIRECT | GO:0019010--signal transduction by protein phosphorylation                       | 1  | 1.0799136 | 0.0249488 | ACVR1B, PRKCB1, CAB39, KDR, TGFBR2                                                                                                                                                                                                                                                                                                                                                                                                                                                                                                                                                                                                                                                                                                                                                                                                                                                                                                                                                                                                                              | 427 | 44    | 16792       | 4.458809073  | 1.026303109 | 36.32491197  |
| GOTERM | BP | DIRECT | GO:0051272--positive regulation of cellular component movement                   | 3  | 0.6479482 | 0.0252512 | ACTN4, ETS1, VEGFA                                                                                                                                                                                                                                                                                                                                                                                                                                                                                                                                                                                                                                                                                                                                                                                                                                                                                                                                                                                                                                              | 427 | 10    | 16792       | 11.797568008 | 1.039350713 | 36.6767853   |
| GOTERM | BP | DIRECT | GO:0006983--ER overload response                                                 | 3  | 0.6479482 | 0.0252512 | GSK3B, TP53, PPP1R15B                                                                                                                                                                                                                                                                                                                                                                                                                                                                                                                                                                                                                                                                                                                                                                                                                                                                                                                                                                                                                                           | 427 | 10    | 16792       | 11.797568008 | 1.039350713 | 36.6767853   |
| GOTERM | BP | DIRECT | GO:0053265--organ growth                                                         | 3  | 0.6479482 | 0.0252512 | BCL2, NLGN4, SMAD2                                                                                                                                                                                                                                                                                                                                                                                                                                                                                                                                                                                                                                                                                                                                                                                                                                                                                                                                                                                                                                              | 427 | 10    | 16792       | 11.797568008 | 1.039350713 | 36.6767853   |
| GOTERM | BP | DIRECT | GO:0045616--regulation of hematopoiesis differentiation                          | 3  | 0.6479482 | 0.0252512 | CYLD, NOTCH1, PSMAD1, MAPK14, GSK3                                                                                                                                                                                                                                                                                                                                                                                                                                                                                                                                                                                                                                                                                                                                                                                                                                                                                                                                                                                                                              | 427 | 10    | 16792       | 11.797568008 | 1.039350713 | 36.6767853   |
| GOTERM | BP | DIRECT | GO:0090009--primitive streak formation                                           | 3  | 0.6479482 | 0.0252512 | FOXO2, LHX1, SRF                                                                                                                                                                                                                                                                                                                                                                                                                                                                                                                                                                                                                                                                                                                                                                                                                                                                                                                                                                                                                                                | 427 | 10    | 16792       | 11.797568008 | 1.039350713 | 36.6767853   |
| GOTERM | BP | DIRECT | GO:0003184--planary valve morphogenesis                                          | 3  | 0.6479482 | 0.0252512 | NOTCH2, NOTCH1, TGFBR2                                                                                                                                                                                                                                                                                                                                                                                                                                                                                                                                                                                                                                                                                                                                                                                                                                                                                                                                                                                                                                          | 427 | 10    | 16792       | 11.797568008 | 1.039350713 | 36.6767853   |
| GOTERM | BP | DIRECT | GO:0051146--striated muscle cell differentiation                                 | 3  | 0.6479482 | 0.0252512 | SPAG9, KRAS, MAPK14                                                                                                                                                                                                                                                                                                                                                                                                                                                                                                                                                                                                                                                                                                                                                                                                                                                                                                                                                                                                                                             | 427 | 10    | 16792       | 11.797568008 | 1.039350713 | 36.6767853   |
| GOTERM | BP | DIRECT | GO:0047982--cellular response to hypoxia                                         | 3  | 0.6479482 | 0.0252512 | WASF3, PRKCB1, HIF1A                                                                                                                                                                                                                                                                                                                                                                                                                                                                                                                                                                                                                                                                                                                                                                                                                                                                                                                                                                                                                                            | 427 | 11    | 16792       | 11.797568008 | 1.039350713 | 36.6767853   |
| GOTERM | BP | DIRECT | GO:0071363--cellular response to growth factor stimulus                          | 5  | 1.0799136 | 0.0268516 | PFN1, SHC1, MAPK7, THBS1, CTNWB1                                                                                                                                                                                                                                                                                                                                                                                                                                                                                                                                                                                                                                                                                                                                                                                                                                                                                                                                                                                                                                | 427 | 45    | 16792       | 4.369502992  | 1.041059971 | 38.50881676  |
| GOTERM | BP | DIRECT | GO:0002314--activation of protein kinase activity                                | 5  | 1.0799136 | 0.0268516 | SLC11A1, HMGB1, VEGFA, CAB39, TGFBR2                                                                                                                                                                                                                                                                                                                                                                                                                                                                                                                                                                                                                                                                                                                                                                                                                                                                                                                                                                                                                            | 427 | 45    | 16792       | 4.369502992  | 1.041059971 | 38.50881676  |
| GOTERM | BP | DIRECT | GO:0007160--cell-matrix adhesion                                                 | 7  | 1.511879  | 0.0268879 | VCAM1, TIAM1, FERMT2, PKD1, SRF, BCL2                                                                                                                                                                                                                                                                                                                                                                                                                                                                                                                                                                                                                                                                                                                                                                                                                                                                                                                                                                                                                           | 427 | 90    | 16792       | 3.085620529  | 1.040871896 | 38.549740662 |
| GOTERM | BP | DIRECT | GO:0002053--positive regulation of mesenchymal cell proliferation                | 4  | 0.8639309 | 0.027358  | CYLD, NOTCH1, PSMAD1, MAPK14, GSK3                                                                                                                                                                                                                                                                                                                                                                                                                                                                                                                                                                                                                                                                                                                                                                                                                                                                                                                                                                                                                              | 427 | 48    | 16792       | 6.058081066  | 1.041200248 | 39.09570495  |
| GOTERM | BP | DIRECT | GO:0000186--activation of MAPK3 cascade                                          | 5  | 1.0799136 | 0.0283891 | EGFR, CRKL, PLCG1, MAPK3, FRS2                                                                                                                                                                                                                                                                                                                                                                                                                                                                                                                                                                                                                                                                                                                                                                                                                                                                                                                                                                                                                                  | 427 | 46    | 16792       | 4.274513797  | 1.026843033 | 40.71149142  |
| GOTERM | BP | DIRECT | GO:0045165--cell fate commitment                                                 | 5  | 1.0799136 | 0.0283891 | WNT1, WNT16, GATA6, GATA4, SMAD2                                                                                                                                                                                                                                                                                                                                                                                                                                                                                                                                                                                                                                                                                                                                                                                                                                                                                                                                                                                                                                | 427 | 46    | 16792       | 4.274513797  | 1.026843033 | 40.71149142  |
| GOTERM | BP | DIRECT | GO:0010595--positive regulation of endothelial cell migration                    | 1  | 1.0799136 | 0.0283891 | ROCK2, ETS1, VEGFA, THBS1, KDR                                                                                                                                                                                                                                                                                                                                                                                                                                                                                                                                                                                                                                                                                                                                                                                                                                                                                                                                                                                                                                  | 427 | 46    | 16792       | 4.274513797  | 1.026843033 | 40.71149142  |
| GOTERM | BP | DIRECT | GO:0000255--regulation of transcription, DNA-templated                           | 5  | 1.1015119 | 0.0290287 | WASF3, PRKCB1, HIF1A, CTNWB1                                                                                                                                                                                                                                                                                                                                                                                                                                                                                                                                                                                                                                                                                                                                                                                                                                                                                                                                                                                                                                    | 427 | 1504  | 16792       | 1.333511834  | 1.026378845 | 40.85289652  |
| GOTERM | BP | DIRECT | GO:0032728--positive regulation of interferon-beta production                    | 4  | 0.8639309 | 0.0302114 | POLR3F, HMGB1, TBK1, FLOT1                                                                                                                                                                                                                                                                                                                                                                                                                                                                                                                                                                                                                                                                                                                                                                                                                                                                                                                                                                                                                                      | 427 | 27    | 16792       | 5.826003399  | 1.043766624 | 42.19310906  |
| GOTERM | BP | DIRECT | GO:0003109--hair follicle morphogenesis                                          | 4  | 0.8639309 | 0.0302114 | NOTCH1, BCL2, CTNWB1, TGFBR2                                                                                                                                                                                                                                                                                                                                                                                                                                                                                                                                                                                                                                                                                                                                                                                                                                                                                                                                                                                                                                    | 427 | 27    | 16792       | 5.826003399  | 1.043766624 | 42.19310906  |
| GOTERM | BP | DIRECT | GO:0003249--response to miramydip dipeptide                                      | 3  | 0.6479482 | 0.0303518 | NOTCH1, MAPK3, ERBB1                                                                                                                                                                                                                                                                                                                                                                                                                                                                                                                                                                                                                                                                                                                                                                                                                                                                                                                                                                                                                                            | 427 | 11    | 16792       | 10.725512174 | 1.043702535 | 42.34361782  |
| GOTERM | BP | DIRECT | GO:0004927--positive regulation of protein chemotaxis                            | 3  | 0.6479482 | 0.0303518 | VEGFA, SMAD3, KDR                                                                                                                                                                                                                                                                                                                                                                                                                                                                                                                                                                                                                                                                                                                                                                                                                                                                                                                                                                                                                                               | 427 | 11    | 16792       | 10.725512174 | 1.043702535 | 42.34361782  |
| GOTERM | BP | DIRECT | GO:0046854--phosphatidylinositol phosphorylation                                 | 4  | 0.9676026 | 0.0313884 | DLC1, EGFR, FGF, GRB2, E2H2, BPC, PTEN                                                                                                                                                                                                                                                                                                                                                                                                                                                                                                                                                                                                                                                                                                                                                                                                                                                                                                                                                                                                                          | 427 | 565   | 16792       | 1.600862158  | 1.045560226 | 43.43817325  |
| GOTERM | BP | DIRECT | GO:0004854--phosphatidylinositol phosphorylation                                 | 4  | 1.511879  | 0.0323619 | EGFR, GRB2, PIK3CA, FGF, BPC, IRS1, FRS2                                                                                                                                                                                                                                                                                                                                                                                                                                                                                                                                                                                                                                                                                                                                                                                                                                                                                                                                                                                                                        | 427 | 16792 | 2.928496686 | 1.045399899  | 44.44066776 |              |
| GOTERM | BP | DIRECT | GO:0001317--positive regulation of cell cycle                                    | 4  | 0.8639309 | 0.0323619 | EIF4E, ARPC2, ARPC1, ARPC3, ARPC4, ARPC5, ARPC6, ARPC7, ARPC8, ARPC9, ARPC10, ARPC11, ARPC12, ARPC13, ARPC14, ARPC15, ARPC16, ARPC17, ARPC18, ARPC19, ARPC20, ARPC21, ARPC22, ARPC23, ARPC24, ARPC25, ARPC26, ARPC27, ARPC28, ARPC29, ARPC30, ARPC31, ARPC32, ARPC33, ARPC34, ARPC35, ARPC36, ARPC37, ARPC38, ARPC39, ARPC40, ARPC41, ARPC42, ARPC43, ARPC44, ARPC45, ARPC46, ARPC47, ARPC48, ARPC49, ARPC50, ARPC51, ARPC52, ARPC53, ARPC54, ARPC55, ARPC56, ARPC57, ARPC58, ARPC59, ARPC60, ARPC61, ARPC62, ARPC63, ARPC64, ARPC65, ARPC66, ARPC67, ARPC68, ARPC69, ARPC70, ARPC71, ARPC72, ARPC73, ARPC74, ARPC75, ARPC76, ARPC77, ARPC78, ARPC79, ARPC80, ARPC81, ARPC82, ARPC83, ARPC84, ARPC85, ARPC86, ARPC87, ARPC88, ARPC89, ARPC90, ARPC91, ARPC92, ARPC93, ARPC94, ARPC95, ARPC96, ARPC97, ARPC98, ARPC99, ARPC100                                                                                                                                                                                                                                   | 427 | 16792 | 2.928496686 | 1.045399899  | 44.44066776 |              |
| GOTERM | BP | DIRECT | GO:0090020--positive regulation of release of cytochrome c from mitochondria     | 4  | 0.8639309 | 0.0323725 | MFF, TP53, PMAIP1, BCL2L1                                                                                                                                                                                                                                                                                                                                                                                                                                                                                                                                                                                                                                                                                                                                                                                                                                                                                                                                                                                                                                       | 427 | 28    | 16792       | 5.617391219  | 1.045845683 | 45.13311915  |
| GOTERM | BP | DIRECT | GO:0001569--patterning of blood vessels                                          | 4  | 0.8639309 | 0.0332173 | VEGFA, SRF, CTNWB1                                                                                                                                                                                                                                                                                                                                                                                                                                                                                                                                                                                                                                                                                                                                                                                                                                                                                                                                                                                                                                              | 427 | 28    | 16792       | 5.617391219  | 1.045845683 | 45.13311915  |
| GOTERM | BP | DIRECT | GO:0007126--cellular response to mechanical stimulus                             | 6  | 1.2958963 | 0.0341294 | TNFRSF10A, EGFR, TNFRSF10B, GJA1, C                                                                                                                                                                                                                                                                                                                                                                                                                                                                                                                                                                                                                                                                                                                                                                                                                                                                                                                                                                                                                             | 427 | 71    | 16792       | 3.732323696  | 1.046548828 | 46.22634813  |
| GOTERM | BP | DIRECT | GO:0049853--T cell receptor signaling pathway                                    | 1  | 1.9438445 | 0.0341294 | PP2R1A, CD3E, CD3D, CD3EAP, CD3G, CD3GAP, CD3GAP2, CD3GAP3, CD3GAP4, CD3GAP5, CD3GAP6, CD3GAP7, CD3GAP8, CD3GAP9, CD3GAP10, CD3GAP11, CD3GAP12, CD3GAP13, CD3GAP14, CD3GAP15, CD3GAP16, CD3GAP17, CD3GAP18, CD3GAP19, CD3GAP20, CD3GAP21, CD3GAP22, CD3GAP23, CD3GAP24, CD3GAP25, CD3GAP26, CD3GAP27, CD3GAP28, CD3GAP29, CD3GAP30, CD3GAP31, CD3GAP32, CD3GAP33, CD3GAP34, CD3GAP35, CD3GAP36, CD3GAP37, CD3GAP38, CD3GAP39, CD3GAP40, CD3GAP41, CD3GAP42, CD3GAP43, CD3GAP44, CD3GAP45, CD3GAP46, CD3GAP47, CD3GAP48, CD3GAP49, CD3GAP50, CD3GAP51, CD3GAP52, CD3GAP53, CD3GAP54, CD3GAP55, CD3GAP56, CD3GAP57, CD3GAP58, CD3GAP59, CD3GAP60, CD3GAP61, CD3GAP62, CD3GAP63, CD3GAP64, CD3GAP65, CD3GAP66, CD3GAP67, CD3GAP68, CD3GAP69, CD3GAP70, CD3GAP71, CD3GAP72, CD3GAP73, CD3GAP74, CD3GAP75, CD3GAP76, CD3GAP77, CD3GAP78, CD3GAP79, CD3GAP80, CD3GAP81, CD3GAP82, CD3GAP83, CD3GAP84, CD3GAP85, CD3GAP86, CD3GAP87, CD3GAP88, CD3GAP89, CD3GAP90, CD3GAP91, CD3GAP92, CD3GAP93, CD3GAP94, CD3GAP95, CD3GAP96, CD3GAP97, CD3GAP98, CD3GAP99, CD3GAP100 | 427 | 16792 | 3.732323696 | 1.046548828  | 46.22634813 |              |
| GOTERM | BP | DIRECT | GO:0036092--ubiquitin-protein ligase complex assembly                            | 5  | 1.0799136 | 0.0353134 | GRB2, PIK3CA, FGF, IRS1, FRS2                                                                                                                                                                                                                                                                                                                                                                                                                                                                                                                                                                                                                                                                                                                                                                                                                                                                                                                                                                                                                                   | 427 | 49    | 16792       | 4.012808871  | 1.047284065 | 47.19315221  |
| GOTERM | BP | DIRECT | GO:0061158--3-TUR-mediated RNAi destabilization                                  | 3  | 0.6479482 | 0.0358207 | ZFP541, QKI, TRIM71                                                                                                                                                                                                                                                                                                                                                                                                                                                                                                                                                                                                                                                                                                                                                                                                                                                                                                                                                                                                                                             | 427 | 12    | 16792       | 9.831833773  | 1.047611196 | 47.8839659   |
| GOTERM | BP | DIRECT | GO:0048596--embryonic carcinoma-type eye morphogenesis                           | 3  | 0.6479482 | 0.0358207 | FOXO2, ZEB1, CITED2                                                                                                                                                                                                                                                                                                                                                                                                                                                                                                                                                                                                                                                                                                                                                                                                                                                                                                                                                                                                                                             | 427 | 12    | 16792       | 9.831833773  | 1.047611196 | 47.8839659   |
| GOTERM | BP | DIRECT | GO:0049327--ubiquitin-mediated inhibition of translation                         | 3  | 0.6479482 | 0.0358207 | TRIM71, TRIM72, TRIM73, TRIM74, TRIM75, TRIM76, TRIM77, TRIM78, TRIM79, TRIM80, TRIM81, TRIM82, TRIM83, TRIM84, TRIM85, TRIM86, TRIM87, TRIM88, TRIM89, TRIM90, TRIM91, TRIM92, TRIM93, TRIM94, TRIM95, TRIM96, TRIM97, TRIM98, TRIM99, TRIM100                                                                                                                                                                                                                                                                                                                                                                                                                                                                                                                                                                                                                                                                                                                                                                                                                 | 427 | 12    | 16792       | 9.831833773  | 1.047611196 | 47.8839659   |
| GOTERM | BP | DIRECT | GO:0042149--cellular response to glucose starvation                              | 4  | 0.8639309 | 0.0363728 | BCL2, TP53, PMAIP1                                                                                                                                                                                                                                                                                                                                                                                                                                                                                                                                                                                                                                                                                                                                                                                                                                                                                                                                                                                                                                              | 427 | 29    | 16792       | 5.424210611  | 1.0478755   | 48.41459323  |
| GOTERM | BP | DIRECT | GO:0007409--axogenesis                                                           | 5  | 1.511879  | 0.0383136 | PARD6B, NOTCH1, CREB1, BCL2, GSK3B                                                                                                                                                                                                                                                                                                                                                                                                                                                                                                                                                                                                                                                                                                                                                                                                                                                                                                                                                                                                                              | 427 | 98    | 16792       | 2.808692049  | 1.056579277 | 50.41241714  |
| GOTERM | BP | DIRECT | GO:0001654--eye development                                                      | 4  | 0.8639309 | 0.0396766 | HMGB1, RAB18, FGF, TGFBR2                                                                                                                                                                                                                                                                                                                                                                                                                                                                                                                                                                                                                                                                                                                                                                                                                                                                                                                                                                                                                                       | 427 | 30    | 16792       | 5.244033591  | 1.050494352 | 51.48451714  |
| GOTERM | BP | DIRECT | GO:0009791--positive regulation of gene expression                               | 4  | 0.8639309 | 0.0396766 | CDKN1A, C/EBP, CTNWB1                                                                                                                                                                                                                                                                                                                                                                                                                                                                                                                                                                                                                                                                                                                                                                                                                                                                                                                                                                                                                                           | 427 | 30    | 16792       | 5.244033591  | 1.050494352 | 51.48451714  |
| GOTERM | BP | DIRECT | GO:1900740--positive regulation of protein insertion into mitochondrial membrane | 4  | 0.8639309 | 0.0396766 | BCL2, TP53, PMAIP1, BCL2L1                                                                                                                                                                                                                                                                                                                                                                                                                                                                                                                                                                                                                                                                                                                                                                                                                                                                                                                                                                                                                                      | 427 | 30    | 16792       | 5.244033591  | 1.050494352 | 51.48451714  |
| GOTERM | BP | DIRECT | GO:0042542--response to hydrogen peroxide                                        | 5  | 1.0799136 | 0.0400596 | LDHA, JNK1, ABL2, AREG, PPP1R15B                                                                                                                                                                                                                                                                                                                                                                                                                                                                                                                                                                                                                                                                                                                                                                                                                                                                                                                                                                                                                                | 427 | 51    | 16792       | 3.855443817  | 1.050261823 | 51.82004749  |
| GOTERM | BP | DIRECT | GO:0006367--transcription initiation from RNA polymerase II promoter             | 1  | 1.9438445 | 0.0401438 | NOTCH1, NOTCH1, E2F3, NRBP1, RARG,                                                                                                                                                                                                                                                                                                                                                                                                                                                                                                                                                                                                                                                                                                                                                                                                                                                                                                                                                                                                                              | 427 | 152   | 16792       | 2.338487441  | 1.050483027 | 51.90834271  |
| GOTERM | BP | DIRECT | GO:0046852--ubiquitin-mediated inhibition of translation                         | 3  | 0.6479482 | 0.041636  | WNT1, WNT16, GATA6, GATA4, SMAD2                                                                                                                                                                                                                                                                                                                                                                                                                                                                                                                                                                                                                                                                                                                                                                                                                                                                                                                                                                                                                                | 427 | 152   | 16792       | 2.338487441  | 1.050483027 | 51.90834271  |
| GOTERM | BP | DIRECT | GO:0061029--cytidyl development in carcinoma-type eye                            | 3  | 0.6479482 | 0.041636  | EGFR, JNK1, PTFN                                                                                                                                                                                                                                                                                                                                                                                                                                                                                                                                                                                                                                                                                                                                                                                                                                                                                                                                                                                                                                                | 427 | 13    | 16792       | 9.0751216    | 1.051566833 | 53.22294391  |
| GOTERM | BP | DIRECT | GO:0007267--protein localization to membrane                                     | 3  | 0.6479482 | 0.041636  | CPIA1, TIAM1, FERMT2                                                                                                                                                                                                                                                                                                                                                                                                                                                                                                                                                                                                                                                                                                                                                                                                                                                                                                                                                                                                                                            | 427 | 13    | 16792       | 9.0751216    | 1.051566833 | 53.22294391  |
| GOTERM | BP | DIRECT | GO:0007267--protein localization to membrane                                     | 3  | 0.6479482 | 0.041636  | NCOA2, HFE, GDF2                                                                                                                                                                                                                                                                                                                                                                                                                                                                                                                                                                                                                                                                                                                                                                                                                                                                                                                                                                                                                                                | 427 | 13    | 16792       | 9.0751216    | 1.051566833 | 53.22294391  |
| GOTERM | BP | DIRECT | GO:0007267--protein localization to membrane                                     | 3  | 0.6479482 | 0.041636  | NOTCH1, NOTCH1, E2F3, NRBP1, RARG,                                                                                                                                                                                                                                                                                                                                                                                                                                                                                                                                                                                                                                                                                                                                                                                                                                                                                                                                                                                                                              | 427 | 13    | 16792       | 9.0751216    | 1.051566833 | 53.22294391  |
| GOTERM | BP | DIRECT | GO:0006413--airial septum morphogenesis                                          | 3  | 0.6479482 | 0.041636  | NOTCH2, GATGA, TGFBR2                                                                                                                                                                                                                                                                                                                                                                                                                                                                                                                                                                                                                                                                                                                                                                                                                                                                                                                                                                                                                                           | 427 | 13    | 16792       | 9.0751216    | 1.051566833 | 53.22294391  |
| GOTERM | BP | DIRECT | GO:0003198--epithelial to mesenchymal transition involved in endocardial cushion | 3  | 0.6479482 | 0.041636  | NOTCH1, SMAD2, SNAI2                                                                                                                                                                                                                                                                                                                                                                                                                                                                                                                                                                                                                                                                                                                                                                                                                                                                                                                                                                                                                                            | 427 | 13    | 16792       | 9.0751216    | 1.051566833 | 53.22294391  |
| GOTERM | BP | DIRECT | GO:2000273--positive regulation of receptor activity                             | 3  | 0.6479482 | 0.041636  | NCOA2, HFE, GDF2                                                                                                                                                                                                                                                                                                                                                                                                                                                                                                                                                                                                                                                                                                                                                                                                                                                                                                                                                                                                                                                | 427 | 13    | 16792       | 9.0751216    | 1.051566833 | 53.22294391  |
| GOTERM | BP | DIRECT | GO:0049627--positive regulation of protein phosphorylation                       | 3  | 0.6479482 | 0.041636  | NOTCH1, NOTCH1, E2F3, NRBP1, RARG,                                                                                                                                                                                                                                                                                                                                                                                                                                                                                                                                                                                                                                                                                                                                                                                                                                                                                                                                                                                                                              | 427 | 13    | 16792       | 9.0751216    | 1.051566833 | 53.22294391  |
| GOTERM | BP | DIRECT | GO:0007623--circadian rhythm                                                     | 6  | 1.2958963 | 0.0417531 | EGFR, EP300, JNK1, CREB1, GSK3B, C/EBP                                                                                                                                                                                                                                                                                                                                                                                                                                                                                                                                                                                                                                                                                                                                                                                                                                                                                                                                                                                                                          | 427 | 75    | 16792       | 3.146042155  | 1.051441529 | 53.30924148  |
| GOTERM | BP | DIRECT | GO:0010468--regulation of gene expression                                        | 7  | 1.511879  | 0.0418503 | ZFP541, BMI1, DNMT3A, LHX1, CLC2                                                                                                                                                                                                                                                                                                                                                                                                                                                                                                                                                                                                                                                                                                                                                                                                                                                                                                                                                                                                                                | 427 | 100   | 16792       | 2.752786885  | 1.051328414 | 53.40947486  |
| GOTERM | BP | DIRECT | GO:0004097--response to cytokine                                                 | 5  | 1.0799136 | 0.0425621 | MCL1, JNK1, CD274, SRF                                                                                                                                                                                                                                                                                                                                                                                                                                                                                                                                                                                                                                                                                                                                                                                                                                                                                                                                                                                                                                          | 427 | 52    | 16792       | 3.781300667  | 1.051722539 | 54.02091895  |
| GOTERM | BP | DIRECT | GO:0003760--positive regulation of angiogenesis                                  | 4  | 0.8639309 | 0.0425621 | MTS1, MAPK7, EPHA2, PMAIP1                                                                                                                                                                                                                                                                                                                                                                                                                                                                                                                                                                                                                                                                                                                                                                                                                                                                                                                                                                                                                                      | 427 | 52    | 16792       | 3.781300667  | 1.051722539 | 54.02091895  |
| GOTERM | BP | DIRECT | GO:0004008--regulation of growth                                                 | 4  | 0.8639309 | 0.0447891 | GNA13, DCL1, FGF9, GARRB1, GJA1, DEJ                                                                                                                                                                                                                                                                                                                                                                                                                                                                                                                                                                                                                                                                                                                                                                                                                                                                                                                                                                                                                            | 427 | 1161  | 16792       | 1.348489469  | 1.053145606 | 55.89796354  |
| GOTERM | BP | DIRECT | GO:0001843--neural tube closure                                                  | 5  | 1.0799136 | 0.0451508 | MORF4L1, YEATS4, ZMAT3, SHC1                                                                                                                                                                                                                                                                                                                                                                                                                                                                                                                                                                                                                                                                                                                                                                                                                                                                                                                                                                                                                                    | 427 | 53    | 16792       | 3.709953571  | 1.053279866 | 56.1949842   |
| GOTERM | BP | DIRECT | GO:0009349--positive regulation of protein catabolic process                     | 6  | 1.2958963 | 0.0458918 | HDAC1, PEN1, RARG, TRIM71, MTS1, FERMT2                                                                                                                                                                                                                                                                                                                                                                                                                                                                                                                                                                                                                                                                                                                                                                                                                                                                                                                                                                                                                         | 427 | 77    | 16792       | 3.064532674  | 1.052612257 | 56.79821962  |
| GOTERM | BP |        |                                                                                  |    |           |           |                                                                                                                                                                                                                                                                                                                                                                                                                                                                                                                                                                                                                                                                                                                                                                                                                                                                                                                                                                                                                                                                 |     |       |             |              |             |              |

|                                                                                                      |   |           |           |                                        |     |     |       |             |   |             |             |
|------------------------------------------------------------------------------------------------------|---|-----------|-----------|----------------------------------------|-----|-----|-------|-------------|---|-------------|-------------|
| GOTERM BP DIRECT GO:0008361--regulation of cell size                                                 | 3 | 0.6479482 | 0.0903805 | RARG, CREB1, MSN                       | 427 | 20  | 16792 | 5.89882904  | 1 | 0.703279228 | 81.59190734 |
| GOTERM BP DIRECT GO:0001892--embryonic placenta development                                          | 3 | 0.6479482 | 0.0903805 | EGFR, PKD1, CITED2                     | 427 | 20  | 16792 | 5.89882904  | 1 | 0.703279228 | 81.59190734 |
| GOTERM BP DIRECT GO:0050900--leukocyte migration                                                     | 7 | 1.5118179 | 0.0904229 | KRAS, PLCG1, GRB2, PODXL, SHC1, MSN    | 427 | 122 | 16792 | 2.236582693 | 1 | 0.701808594 | 81.60722802 |
| GOTERM BP DIRECT GO:0018108--peptidyl-tyrosine phosphorylation                                       | 8 | 1.7278618 | 0.095068  | EGFR, EPHA7, FLT1, FGF9, BTC, ABI2, EF | 427 | 153 | 16792 | 2.056236702 | 1 | 0.719050631 | 83.21497142 |
| GOTERM BP DIRECT GO:1904837--beta-catenin-TCT complex assembly                                       | 4 | 0.8639309 | 0.0951529 | EP300, TCF7L2, TCF7L1, CTNNB1          | 427 | 43  | 16792 | 3.658188552 | 1 | 0.717767028 | 83.24306628 |
| GOTERM BP DIRECT GO:0030135--regulation of cell adhesion                                             | 4 | 0.8639309 | 0.0951529 | ROCK2, PPP1R12A, PKD1, SRF             | 427 | 43  | 16792 | 3.658188552 | 1 | 0.717767028 | 83.24306628 |
| GOTERM BP DIRECT GO:0051726--regulation of cell cycle                                                | 7 | 1.5118179 | 0.0959169 | CCNE2, EP300, JUN, BAP1, USP16, PTEN,  | 427 | 124 | 16792 | 2.219989424 | 1 | 0.719158105 | 83.49406179 |
| GOTERM BP DIRECT GO:0007169--transmembrane receptor protein tyrosine kinase signaling pathway        | 6 | 1.2958963 | 0.0971905 | EGFR, IGF1R, MTS1, FLT1, KDR, IL13RA   | 427 | 96  | 16792 | 2.457845433 | 1 | 0.722502511 | 83.90457031 |
| GOTERM BP DIRECT GO:0007621--negative regulation of female receptivity                               | 2 | 0.4319654 | 0.0976886 | THRB, AVPR1A                           | 427 | 4   | 16792 | 19.66276347 | 1 | 0.72282582  | 84.06248713 |
| GOTERM BP DIRECT GO:0003219--cardiac right ventricle formation                                       | 2 | 0.4319654 | 0.0976886 | NOTCH1, SMARCD3                        | 427 | 4   | 16792 | 19.66276347 | 1 | 0.72282582  | 84.06248713 |
| GOTERM BP DIRECT GO:1901031--regulation of response to reactive oxygen species                       | 2 | 0.4319654 | 0.0976886 | SESN2, SESN1                           | 427 | 4   | 16792 | 19.66276347 | 1 | 0.72282582  | 84.06248713 |
| GOTERM BP DIRECT GO:0046498--S-adenosylhomocysteine metabolic process                                | 2 | 0.4319654 | 0.0976886 | DNMT3A, DNMT3B                         | 427 | 4   | 16792 | 19.66276347 | 1 | 0.72282582  | 84.06248713 |
| GOTERM BP DIRECT GO:0060534--trachea cartilage development                                           | 2 | 0.4319654 | 0.0976886 | RARG, SRF                              | 427 | 4   | 16792 | 19.66276347 | 1 | 0.72282582  | 84.06248713 |
| GOTERM BP DIRECT GO:0060429--epithelium development                                                  | 2 | 0.4319654 | 0.0976886 | LHX1, SNAI2                            | 427 | 4   | 16792 | 19.66276347 | 1 | 0.72282582  | 84.06248713 |
| GOTERM BP DIRECT GO:0072177--mesonephric duct development                                            | 2 | 0.4319654 | 0.0976886 | LHX1, PKD1                             | 427 | 4   | 16792 | 19.66276347 | 1 | 0.72282582  | 84.06248713 |
| GOTERM BP DIRECT GO:0055522--monoubiquitinated histone H2A deubiquitination                          | 2 | 0.4319654 | 0.0976886 | BAP1, USP16                            | 427 | 4   | 16792 | 19.66276347 | 1 | 0.72282582  | 84.06248713 |
| GOTERM BP DIRECT GO:0090403--oxidative stress-induced premature senescence                           | 2 | 0.4319654 | 0.0976886 | WNT16, TP53                            | 427 | 4   | 16792 | 19.66276347 | 1 | 0.72282582  | 84.06248713 |
| GOTERM BP DIRECT GO:1904954--canonical Wnt signaling pathway involved in midbrain dopaminergic       | 2 | 0.4319654 | 0.0976886 | WNT1, CTNNB1                           | 427 | 4   | 16792 | 19.66276347 | 1 | 0.72282582  | 84.06248713 |
| GOTERM BP DIRECT GO:0061419--positive regulation of transcription from RNA polymerase II promoter    | 2 | 0.4319654 | 0.0976886 | NOTCH1, VEGFA                          | 427 | 4   | 16792 | 19.66276347 | 1 | 0.72282582  | 84.06248713 |
| GOTERM BP DIRECT GO:1903347--negative regulation of bicellular tight junction assembly               | 2 | 0.4319654 | 0.0976886 | ROCK2, IKKKB                           | 427 | 4   | 16792 | 19.66276347 | 1 | 0.72282582  | 84.06248713 |
| GOTERM BP DIRECT GO:0007161--calcium-independent cell-matrix adhesion                                | 2 | 0.4319654 | 0.0976886 | PKD1, FNI                              | 427 | 4   | 16792 | 19.66276347 | 1 | 0.72282582  | 84.06248713 |
| GOTERM BP DIRECT GO:0002520--immune system development                                               | 2 | 0.4319654 | 0.0976886 | TROVE2, SMAD3                          | 427 | 4   | 16792 | 19.66276347 | 1 | 0.72282582  | 84.06248713 |
| GOTERM BP DIRECT GO:0090400--stress-induced premature senescence                                     | 2 | 0.4319654 | 0.0976886 | CDKN1A, MAPK14                         | 427 | 4   | 16792 | 19.66276347 | 1 | 0.72282582  | 84.06248713 |
| GOTERM BP DIRECT GO:0003273--cell migration involved in endocardial cushion formation                | 2 | 0.4319654 | 0.0976886 | NOTCH1, SNAI2                          | 427 | 4   | 16792 | 19.66276347 | 1 | 0.72282582  | 84.06248713 |
| GOTERM BP DIRECT GO:0043154--negative regulation of cysteine-type endopeptidase activity involved in | 5 | 1.0799136 | 0.0979668 | XIAP, VEGFA, HGF, THBS1, DNAJB6        | 427 | 69  | 16792 | 2.849675865 | 1 | 0.722306814 | 84.13004748 |
| GOTERM BP DIRECT GO:0031954--positive regulation of protein autophosphorylation                      | 3 | 0.6479482 | 0.0982779 | RAP2C, VEGFA, RASSF2                   | 427 | 21  | 16792 | 5.617932419 | 1 | 0.721917161 | 84.24741176 |
| GOTERM BP DIRECT GO:0097150--neural stem cell population maintenance                                 | 3 | 0.6479482 | 0.0982779 | NOTCH1, FOXO1, FOXO3                   | 427 | 21  | 16792 | 5.617932419 | 1 | 0.721917161 | 84.24741176 |
| GOTERM BP DIRECT GO:0031016--pancreas development                                                    | 3 | 0.6479482 | 0.0982779 | SMAD2, TCF7L2, CTNNB1                  | 427 | 21  | 16792 | 5.617932419 | 1 | 0.721917161 | 84.24741176 |
| GOTERM BP DIRECT GO:0071480--cellular response to gamma radiation                                    | 3 | 0.6479482 | 0.0982779 | CDKN1A, CHEK2, YAP1                    | 427 | 21  | 16792 | 5.617932419 | 1 | 0.721917161 | 84.24741176 |
| GOTERM BP DIRECT GO:1900182--positive regulation of protein localization to nucleus                  | 3 | 0.6479482 | 0.0982779 | TRIM8, SESN2, TGFBI2                   | 427 | 21  | 16792 | 5.617932419 | 1 | 0.721917161 | 84.24741176 |
| GOTERM BP DIRECT GO:0051894--positive regulation of focal adhesion assembly                          | 3 | 0.6479482 | 0.0982779 | VEGFA, SMAD3, KDR                      | 427 | 21  | 16792 | 5.617932419 | 1 | 0.721917161 | 84.24741176 |
| GOTERM BP DIRECT GO:0042127--regulation of cell proliferation                                        | 9 | 1.9438445 | 0.0994809 | TNFRSF10A, CDKN1B, TNFRSF10B, XIAP     | 427 | 185 | 16792 | 1.913133743 | 1 | 0.724905829 | 84.61867105 |

| Category  | Term                                                                    | Count | %        | PValue   | Genes                         | List Total | Pop Hits | Pop Total | Fold Enrich | Bonferroni | Benjamini | FDR      |
|-----------|-------------------------------------------------------------------------|-------|----------|----------|-------------------------------|------------|----------|-----------|-------------|------------|-----------|----------|
| GOTERM CC | DIRECT GO:0005654--nucleoplasm                                          | 134   | 28.94168 | 1.16E-15 | MORF4L1, NRBP1, THRB, RBM     | 443        | 2784     | 18224     | 1.980047    | 4.83E-13   | 4.83E-13  | 1.57E-12 |
| GOTERM CC | DIRECT GO:0005634--nucleus                                              | 206   | 44.49244 | 5.80E-14 | DLCL1, LDHA, TRAPPC2B, TUBI   | 443        | 5415     | 18224     | 1.56498     | 2.52E-11   | 1.26E-11  | 8.18E-11 |
| GOTERM CC | DIRECT GO:0005829--cytosol                                              | 140   | 30.23758 | 6.72E-12 | DLCL1, LDHA, NRBP1, TBK1, FC  | 443        | 3315     | 18224     | 1.737339    | 2.92E-09   | 9.74E-10  | 9.48E-09 |
| GOTERM CC | DIRECT GO:0005737--cytoplasm                                            | 192   | 41.46868 | 2.84E-11 | GNAI3, DLCL1, MTSS1, LDHA, T  | 443        | 5222     | 18224     | 1.512531    | 1.23E-08   | 3.08E-09  | 4.00E-08 |
| GOTERM CC | DIRECT GO:0030529--intracellular ribonucleoprotein complex              | 17    | 3.671706 | 1.99E-07 | SNRPA1, ACTN4, G3BP2, CASC    | 443        | 136      | 18224     | 5.142212    | 8.67E-05   | 1.73E-05  | 2.81E-04 |
| GOTERM CC | DIRECT GO:0005925--focal adhesion                                       | 29    | 6.263499 | 3.59E-07 | GNAI3, DLCL1, FERMT2, GJA1,   | 443        | 391      | 18224     | 3.051134    | 1.56E-04   | 2.60E-05  | 5.07E-04 |
| GOTERM CC | DIRECT GO:0005768--endosome                                             | 21    | 4.535637 | 6.35E-07 | EGFR, HMGB1, PLD1, FLT1, RA   | 443        | 225      | 18224     | 3.839518    | 2.76E-04   | 3.94E-05  | 8.96E-04 |
| GOTERM CC | DIRECT GO:0000790--nuclear chromatin                                    | 18    | 3.887689 | 4.97E-06 | RARG, THRB, CREB1, EZH2, TI   | 443        | 193      | 18224     | 3.836676    | 0.002161   | 2.70E-04  | 0.007021 |
| GOTERM CC | DIRECT GO:0005667--transcription factor complex                         | 18    | 3.887689 | 4.97E-06 | SATB2, E2F3, RARG, SMAD4, S   | 443        | 193      | 18224     | 3.836676    | 0.002161   | 2.70E-04  | 0.007021 |
| GOTERM CC | DIRECT GO:0030027--lamellipodium                                        | 15    | 3.239741 | 3.65E-05 | NRBP1, ARPC3, PLCG1, WASF2    | 443        | 160      | 18224     | 3.856569    | 0.015737   | 0.001761  | 0.051468 |
| GOTERM CC | DIRECT GO:0048471--perinuclear region of cytoplasm                      | 31    | 6.695464 | 2.85E-04 | CCNT2, TRAPPC2B, RAB3B, NI    | 443        | 621      | 18224     | 2.053573    | 0.1166503  | 0.012329  | 0.401819 |
| GOTERM CC | DIRECT GO:0031093--platelet alpha granule lumen                         | 8     | 1.727862 | 3.50E-04 | A1BG, ACTN4, VEGFA, IGF2, H   | 443        | 55       | 18224     | 5.983665    | 0.14112    | 0.013734  | 0.492518 |
| GOTERM CC | DIRECT GO:0016605--PML body                                             | 10    | 2.159827 | 6.26E-04 | ATRX, TRIM8, MKNK2, TP53, A   | 443        | 98       | 18224     | 4.197724    | 0.238422   | 0.022441  | 0.880077 |
| GOTERM CC | DIRECT GO:0005730--nucleolus                                            | 37    | 7.991361 | 9.99E-04 | CDV3, MTDH, CDC14B, GRB2,     | 443        | 857      | 18224     | 1.776073    | 0.352678   | 0.032901  | 1.401619 |
| GOTERM CC | DIRECT GO:0030496--midbody                                              | 11    | 2.37581  | 0.0012   | KIF13A, CYLD, RCC2, INCENP,   | 443        | 129      | 18224     | 3.507866    | 0.406948   | 0.036632  | 1.681429 |
| GOTERM CC | DIRECT GO:0016363--nuclear matrix                                       | 9     | 1.943844 | 0.002472 | XPO1, YEATS4, DNMT3A, SAI     | 443        | 97       | 18224     | 3.8169      | 0.659298   | 0.069267  | 3.434298 |
| GOTERM CC | DIRECT GO:0043234--protein complex                                      | 21    | 4.535637 | 0.002688 | SUZ12, SP1, KDM5A, TCF7L2, C  | 443        | 412      | 18224     | 2.096824    | 0.689944   | 0.070574  | 3.729257 |
| GOTERM CC | DIRECT GO:0032993--protein-DNA complex                                  | 15    | 1.079914 | 0.002882 | SUZ12, SP1, KDM5A, TCF7L2, C  | 443        | 25       | 18224     | 8.22754     | 0.715111   | 0.0712    | 3.993383 |
| GOTERM CC | DIRECT GO:0005741--mitochondrial outer membrane                         | 11    | 2.37581  | 0.003481 | MPF, CISD2, MCCL1, PHB2, BCL  | 443        | 149      | 18224     | 3.037011    | 0.78058    | 0.080812  | 4.803569 |
| GOTERM CC | DIRECT GO:0016020--membrane                                             | 72    | 15.50076 | 0.007142 | GNAI3, LDHA, NRBP1, RAB5B     | 443        | 2200     | 18224     | 1.346325    | 0.955752   | 0.151344  | 9.624306 |
| GOTERM CC | DIRECT GO:0043292--contractile fiber                                    | 3     | 0.647948 | 0.011369 | PPP1R12A, GJA1, DEK           | 443        | 7        | 18224     | 17.63044    | 0.993083   | 0.220179  | 14.90726 |
| GOTERM CC | DIRECT GO:0016324--apical plasma membrane                               | 15    | 3.239741 | 0.01186  | EGFR, PAR6B, PLD1, MTDH, I    | 443        | 291      | 18224     | 2.1205      | 0.994428   | 0.218971  | 15.50227 |
| GOTERM CC | DIRECT GO:0009986--cell surface                                         | 23    | 4.967603 | 0.013339 | EGFR, DCBLD2, HMGB1, FERM     | 443        | 542      | 18224     | 1.745696    | 0.997096   | 0.233196  | 17.27029 |
| GOTERM CC | DIRECT GO:0071141--SMAD protein complex                                 | 3     | 0.647948 | 0.014917 | SMAD4, SMAD3, SMAD2           | 443        | 8        | 18224     | 15.42664    | 0.998552   | 0.247423  | 19.11877 |
| GOTERM CC | DIRECT GO:0015629--actin cytoskeleton                                   | 12    | 2.591793 | 0.017612 | PPP, MTSS1, ACTN4, ARPC3, ZP  | 443        | 218      | 18224     | 2.26446     | 0.99956    | 0.273351  | 22.18766 |
| GOTERM CC | DIRECT GO:0009898--cytoplasmic side of plasma membrane                  | 5     | 1.079914 | 0.01848  | RGS2, TRPN4, IKKB, PTEN, R    | 443        | 42       | 18224     | 4.897345    | 0.999701   | 0.277154  | 23.15231 |
| GOTERM CC | DIRECT GO:0036464--cytoplasmic ribonucleoprotein granule                | 4     | 0.863931 | 0.021938 | TUBB, ROCK2, PABPC1, RPS4B    | 443        | 25       | 18224     | 6.582032    | 0.999936   | 0.310047  | 26.88807 |
| GOTERM CC | DIRECT GO:0005739--mitochondrion                                        | 45    | 9.719222 | 0.022422 | APO1, CYP11B1, MCCL1, CLPB,   | 443        | 1331     | 18224     | 1.390831    | 0.999948   | 0.306053  | 27.39715 |
| GOTERM CC | DIRECT GO:0070062--extracellular exosome                                | 85    | 18.35853 | 0.022537 | GNAI3, LDHA, CADM1, WASF,     | 443        | 2811     | 18224     | 1.243936    | 0.999951   | 0.298224  | 27.5178  |
| GOTERM CC | DIRECT GO:0005916--fascia adherens                                      | 3     | 0.647948 | 0.023218 | GJA1, CTNNA3, CTNNB1          | 443        | 10       | 18224     | 12.34131    | 0.999964   | 0.296986  | 28.2717  |
| GOTERM CC | DIRECT GO:0031234--extrinsic component of cytoplasmic side of plasma me | 6     | 1.295896 | 0.024551 | CYLD, KRAS, TIAM1, FERMT2,    | 443        | 68       | 18224     | 3.629797    | 0.99998    | 0.30263   | 29.59803 |
| GOTERM CC | DIRECT GO:0005793--endoplasmic reticulum-Golgi intermediate compart     | 6     | 1.295896 | 0.024551 | HMGB1, TRAPPC2B, DICER1, S    | 443        | 68       | 18224     | 3.629797    | 0.99998    | 0.30263   | 29.59803 |
| GOTERM CC | DIRECT GO:0005911--cell-cell junction                                   | 10    | 2.159827 | 0.024683 | CADM1, ACTN4, PLCG1, TIAM     | 443        | 172      | 18224     | 2.391727    | 0.999981   | 0.295809  | 29.73208 |
| GOTERM CC | DIRECT GO:0005719--nuclear euchromatin                                  | 4     | 0.863931 | 0.026928 | JUN, CREB1, H2AFZ, CTNNB1     | 443        | 27       | 18224     | 6.094474    | 0.999993   | 0.310008  | 31.98163 |
| GOTERM CC | DIRECT GO:0005819--spindle                                              | 8     | 1.727862 | 0.0281   | CYLD, EVI5, INCENP, KLHL42,   | 443        | 121      | 18224     | 2.719848    | 0.999996   | 0.313203  | 33.12914 |
| GOTERM CC | DIRECT GO:0045177--apical part of cell                                  | 6     | 1.295896 | 0.0355   | VCAM1, PAR6B, HFE, MSN, C     | 443        | 75       | 18224     | 3.291016    | 1          | 0.370263  | 39.96928 |
| GOTERM CC | DIRECT GO:0005856--cytoskeleton                                         | 16    | 3.455724 | 0.037701 | PPP1R18, WASF3, FERMT2, PTI   | 443        | 371      | 18224     | 1.774133    | 1          | 0.379748  | 41.87344 |
| GOTERM CC | DIRECT GO:0000164--protein phosphatase type 1 complex                   | 3     | 0.647948 | 0.038367 | PPP1R11, SHOC2, PPP1R15B      | 443        | 13       | 18224     | 9.493315    | 1          | 0.376699  | 42.43958 |
| GOTERM CC | DIRECT GO:0005721--pericentric heterochromatin                          | 3     | 0.647948 | 0.038367 | ATRX, INCENP, DNMT1           | 443        | 13       | 18224     | 9.493315    | 1          | 0.376699  | 42.43958 |
| GOTERM CC | DIRECT GO:0001725--stress fiber                                         | 5     | 1.079914 | 0.041722 | ACTN4, FSCN1, FERMT2, SEPT    | 443        | 54       | 18224     | 3.809046    | 1          | 0.394101  | 45.21107 |
| GOTERM CC | DIRECT GO:0090575--RNA polymerase II transcription factor complex       | 4     | 0.863931 | 0.045189 | GATA4, SMAD4, STAT3, HNRN     | 443        | 33       | 18224     | 4.986388    | 1          | 0.411008  | 47.94389 |
| GOTERM CC | DIRECT GO:0070435--Shc-EGFR complex                                     | 2     | 0.431965 | 0.047921 | EGFR, SHC1                    | 443        | 2        | 18224     | 41.1377     | 1          | 0.421739  | 50.00768 |
| GOTERM CC | DIRECT GO:0071144--SMAD2-SMAD3 protein complex                          | 2     | 0.431965 | 0.047921 | SMAD3, SMAD2                  | 443        | 2        | 18224     | 41.1377     | 1          | 0.421739  | 50.00768 |
| GOTERM CC | DIRECT GO:0070369--beta-catenin-TCF7L2 complex                          | 2     | 0.431965 | 0.047921 | TCF7L2, CTNNB1                | 443        | 2        | 18224     | 41.1377     | 1          | 0.421739  | 50.00768 |
| GOTERM CC | DIRECT GO:0005802--trans-Golgi network                                  | 8     | 1.727862 | 0.048026 | RAB30, PLEKHA8, STX16, ATP    | 443        | 136      | 18224     | 2.419865    | 1          | 0.414471  | 50.08571 |
| GOTERM CC | DIRECT GO:0000307--cyclin-dependent protein kinase holoenzyme complex   | 3     | 0.647948 | 0.050036 | CDKN1A, CCND2, CDK6           | 443        | 15       | 18224     | 8.22754     | 1          | 0.419936  | 51.55363 |
| GOTERM CC | DIRECT GO:0005913--cell-cell adherens junction                          | 14    | 3.023758 | 0.051936 | EGFR, LDHA, CADM1, FSCN1,     | 443        | 323      | 18224     | 1.783058    | 1          | 0.424425  | 52.90386 |
| GOTERM CC | DIRECT GO:0031965--nuclear membrane                                     | 11    | 2.37581  | 0.052921 | EGFR, MTDH, LMNB1, CCND2,     | 443        | 229      | 18224     | 1.976047    | 1          | 0.423078  | 53.58953 |
| GOTERM CC | DIRECT GO:0000771--condensed chromosome kinetochore                     | 6     | 1.295896 | 0.060354 | CENPS, TP53BP1, INCENP, RA    | 443        | 87       | 18224     | 2.837083    | 1          | 0.4596    | 58.47356 |
| GOTERM CC | DIRECT GO:0044291--cell-cell contact zone                               | 3     | 0.647948 | 0.062796 | RAP2C, TIAM1, FLOT1           | 443        | 17       | 18224     | 7.259594    | 1          | 0.465768  | 59.97356 |
| GOTERM CC | DIRECT GO:0044521--membrane raft                                        | 10    | 2.159827 | 0.063827 | EGFR, KRAS, PDXL, FLOT1, C    | 443        | 206      | 18224     | 1.996976    | 1          | 0.464047  | 60.59096 |
| GOTERM CC | DIRECT GO:0071944--cell periphery                                       | 4     | 0.863931 | 0.068157 | PHB2, RHOA, MSN, CTNNB1       | 443        | 39       | 18224     | 4.219251    | 1          | 0.479695  | 63.08737 |
| GOTERM CC | DIRECT GO:0032444--activin responsive factor complex                    | 2     | 0.431965 | 0.071015 | SMAD4, SMAD2                  | 443        | 3        | 18224     | 27.42513    | 1          | 0.487043  | 64.65383 |
| GOTERM CC | DIRECT GO:0031528--microvillus membrane                                 | 3     | 0.647948 | 0.076515 | PODXL, MSN, CTNNB1            | 443        | 19       | 18224     | 6.495426    | 1          | 0.50671   | 67.49642 |
| GOTERM CC | DIRECT GO:0043209--myelin sheath                                        | 8     | 1.727862 | 0.077302 | BCL2, PGAM4, FSCN1, NDRG1,    | 443        | 152      | 18224     | 2.165142    | 1          | 0.503389  | 67.88557 |
| GOTERM CC | DIRECT GO:0005938--cell cortex                                          | 7     | 1.511879 | 0.07908  | PPN1, PAR6B, NRBP1, FERMT     | 443        | 123      | 18224     | 2.34117     | 1          | 0.50474   | 68.74815 |
| GOTERM CC | DIRECT GO:0031463--Cul3-RING ubiquitin ligase complex                   | 5     | 1.079914 | 0.079546 | PPP, KLHL28, KLHL42, KEAP1, I | 443        | 67       | 18224     | 3.069977    | 1          | 0.500125  | 68.97085 |
| GOTERM CC | DIRECT GO:0005637--nuclear inner membrane                               | 4     | 0.863931 | 0.085865 | LMNB1, SMAD3, DPY19L1, MA     | 443        | 43       | 18224     | 3.826763    | 1          | 0.52138   | 71.8463  |
| GOTERM CC | DIRECT GO:0043235--receptor complex                                     | 7     | 1.511879 | 0.088996 | EGFR, ACVR1B, NOTCH2, IGF1    | 443        | 127      | 18224     | 2.267432    | 1          | 0.52803   | 73.17746 |
| GOTERM CC | DIRECT GO:0030175--filopodium                                           | 5     | 1.079914 | 0.093723 | VCAM1, PODXL, FSCN1, AB12,    | 443        | 71       | 18224     | 2.897021    | 1          | 0.54083   | 75.077   |
| GOTERM CC | DIRECT GO:0005622--intracellular                                        | 41    | 8.855292 | 0.094001 | RAB5B, ADCY6, BTF, BAP1, IL   | 443        | 1332     | 18224     | 1.26625     | 1          | 0.535511  | 75.18461 |
| GOTERM CC | DIRECT GO:0005720--nuclear heterochromatin                              | 3     | 0.647948 | 0.09863  | ATRX, DNMT3A, H2AFZ           | 443        | 22       | 18224     | 5.609686    | 1          | 0.547269  | 76.91594 |

| Category         | Term                                                                              | Count | %        | PValue   | Genes      | List Total | Pop Hits | Pop Total | Fold Enrich | Bonferroni | Benjamini | FDR      |
|------------------|-----------------------------------------------------------------------------------|-------|----------|----------|------------|------------|----------|-----------|-------------|------------|-----------|----------|
| GOTERM MF DIRECT | GO:0005515--protein binding                                                       | 303   | 65.44276 | 7.69E-16 | DLG1, LD   | 427        | 8785     | 16881     | 1.36355     | 5.21E-13   | 5.21E-13  | 1.17E-12 |
| GOTERM MF DIRECT | GO:0003682--chromatin binding                                                     | 35    | 7.559395 | 3.55E-10 | CCNT2, M   | 427        | 391      | 16881     | 3.538845    | 2.38E-07   | 1.19E-07  | 5.32E-07 |
| GOTERM MF DIRECT | GO:0031490--chromatin DNA binding                                                 | 13    | 2.807775 | 1.78E-08 | SUZ12, NC  | 427        | 58       | 16881     | 8.6106      | 1.20E-05   | 3.98E-06  | 2.67E-05 |
| GOTERM MF DIRECT | GO:0019901--protein kinase binding                                                | 30    | 6.479482 | 1.02E-07 | CCNT2, G   | 427        | 376      | 16881     | 3.154305    | 6.85E-05   | 1.71E-05  | 1.53E-04 |
| GOTERM MF DIRECT | GO:0043565--sequence-specific DNA binding                                         | 35    | 7.559395 | 3.84E-07 | FOXA2, TI  | 427        | 518      | 16881     | 2.671213    | 2.57E-04   | 5.15E-05  | 5.76E-04 |
| GOTERM MF DIRECT | GO:0008134--transcription factor binding                                          | 24    | 5.183585 | 9.51E-07 | HMBG1, F   | 427        | 284      | 16881     | 3.340898    | 6.37E-04   | 1.06E-04  | 0.001425 |
| GOTERM MF DIRECT | GO:0044212--transcription regulatory region DNA binding                           | 19    | 4.103672 | 8.05E-06 | ZNF831, F  | 427        | 213      | 16881     | 3.526503    | 0.005379   | 7.70E-04  | 0.012067 |
| GOTERM MF DIRECT | GO:0003700--transcription factor activity, sequence-specific DNA binding          | 48    | 10.36717 | 1.06E-05 | HMBG1, E   | 427        | 961      | 16881     | 1.974641    | 0.007096   | 8.90E-04  | 0.015933 |
| GOTERM MF DIRECT | GO:0044822--poly(A) RNA binding                                                   | 53    | 11.44708 | 1.85E-05 | ZMAT3, R   | 427        | 1129     | 16881     | 1.85589     | 0.012311   | 0.001375  | 0.027715 |
| GOTERM MF DIRECT | GO:0003725--double-stranded RNA binding                                           | 9     | 1.943844 | 1.41E-04 | LSM14A, I  | 427        | 61       | 16881     | 5.832879    | 0.089903   | 0.009376  | 0.201574 |
| GOTERM MF DIRECT | GO:0001228--transcriptional activator activity, RNA polymerase II transcription i | 11    | 2.375811 | 1.41E-04 | EP300, GA  | 427        | 95       | 16881     | 4.577616    | 0.089959   | 0.008533  | 0.21071  |
| GOTERM MF DIRECT | GO:0001085--RNA polymerase II transcription factor binding                        | 8     | 1.727862 | 1.63E-04 | MTDH, G    | 427        | 47       | 16881     | 6.729184    | 0.103534   | 0.009067  | 0.244265 |
| GOTERM MF DIRECT | GO:0035257--nuclear hormone receptor binding                                      | 6     | 1.295896 | 1.85E-04 | NCOA2, E   | 427        | 22       | 16881     | 10.78199    | 0.116344   | 0.009469  | 0.276386 |
| GOTERM MF DIRECT | GO:0008013--beta-catenin binding                                                  | 10    | 2.159827 | 2.19E-04 | PCP0, GS   | 427        | 82       | 16881     | 4.821214    | 0.136642   | 0.01044   | 0.328228 |
| GOTERM MF DIRECT | GO:0005168--neurotrophin TRKA receptor binding                                    | 4     | 0.863931 | 3.02E-04 | PLCG1, GI  | 427        | 6        | 16881     | 26.35597    | 0.182971   | 0.013382  | 0.451163 |
| GOTERM MF DIRECT | GO:0003713--transcription coactivator activity                                    | 17    | 3.671706 | 5.85E-04 | MTDH, R    | 427        | 248      | 16881     | 2.709989    | 0.324463   | 0.024217  | 0.873868 |
| GOTERM MF DIRECT | GO:0003677--DNA binding                                                           | 64    | 13.82289 | 8.15E-04 | EZF3, ZNF  | 427        | 1674     | 16881     | 1.511454    | 0.42097    | 0.03163   | 1.215204 |
| GOTERM MF DIRECT | GO:0003924--GTPase activity                                                       | 16    | 3.455724 | 9.17E-04 | GNA13, R   | 427        | 234      | 16881     | 2.703177    | 0.459197   | 0.033574  | 1.366602 |
| GOTERM MF DIRECT | GO:0005158--insulin receptor binding                                              | 6     | 1.295896 | 9.88E-04 | IGF1R, PD  | 427        | 31       | 16881     | 7.651734    | 0.484381   | 0.034262  | 1.471252 |
| GOTERM MF DIRECT | GO:0003690--double-stranded DNA binding                                           | 9     | 1.943844 | 9.91E-04 | LSM14A, I  | 427        | 81       | 16881     | 4.392662    | 0.485395   | 0.032672  | 1.715591 |
| GOTERM MF DIRECT | GO:0019903--protein phosphatase binding                                           | 8     | 1.727862 | 0.001015 | EGFR, CD   | 427        | 63       | 16881     | 5.020185    | 0.493736   | 0.031894  | 1.511614 |
| GOTERM MF DIRECT | GO:0000978--RNA polymerase II core promoter proximal region sequence-specif       | 20    | 4.319654 | 0.001776 | FOXA2, ZI  | 427        | 355      | 16881     | 2.227265    | 0.696009   | 0.052687  | 2.629209 |
| GOTERM MF DIRECT | GO:0019903--GDP binding                                                           | 7     | 1.511879 | 0.002314 | RAB3B, K   | 427        | 54       | 16881     | 5.124772    | 0.788146   | 0.065246  | 3.412895 |
| GOTERM MF DIRECT | GO:0001102--RNA polymerase II activating transcription factor binding             | 6     | 1.295896 | 0.002326 | EP300, TP  | 427        | 38       | 16881     | 6.242204    | 0.81637    | 0.068182  | 3.721413 |
| GOTERM MF DIRECT | GO:0042802--identical protein binding                                             | 33    | 7.12743  | 0.002648 | MTS1, LI   | 427        | 749      | 16881     | 1.741817    | 0.83076    | 0.068592  | 3.897062 |
| GOTERM MF DIRECT | GO:0031625--ubiquitin protein ligase binding                                      | 17    | 3.671706 | 0.002667 | EGFR, TP   | 427        | 287      | 16881     | 2.341733    | 0.832886   | 0.066497  | 3.924238 |
| GOTERM MF DIRECT | GO:0003723--RNA binding                                                           | 26    | 5.615551 | 0.003264 | RBM15B, A  | 427        | 547      | 16881     | 1.879128    | 0.888154   | 0.07793   | 4.78365  |
| GOTERM MF DIRECT | GO:0003886--DNA (cytosine-5--methyltransferase activity                           | 3     | 0.647948 | 0.003686 | DNMT3A, A  | 427        | 4        | 16881     | 29.65047    | 0.915754   | 0.084567  | 5.385501 |
| GOTERM MF DIRECT | GO:0005525--GTP binding                                                           | 20    | 4.319654 | 0.004423 | GNA13, R   | 427        | 384      | 16881     | 2.059016    | 0.941169   | 0.093072  | 6.142653 |
| GOTERM MF DIRECT | GO:0001076--transcription factor activity, RNA polymerase II transcription factor | 4     | 0.863931 | 0.004721 | GATA4, SI  | 427        | 14       | 16881     | 11.29542    | 0.958003   | 0.1003    | 6.849273 |
| GOTERM MF DIRECT | GO:0019899--enzyme binding                                                        | 18    | 3.887689 | 0.004914 | EGFR, CY   | 427        | 333      | 16881     | 2.136971    | 0.963137   | 0.100998  | 7.19318  |
| GOTERM MF DIRECT | GO:0035035--histone acetyltransferase binding                                     | 5     | 1.079914 | 0.005067 | SP1, ETS1  | 427        | 28       | 16881     | 7.059635    | 0.966733   | 0.10089   | 7.332398 |
| GOTERM MF DIRECT | GO:0009008--DNA-methyltransferase activity                                        | 3     | 0.647948 | 0.00604  | DNMT3A, A  | 427        | 5        | 16881     | 23.72037    | 0.98274    | 0.115747  | 8.68317  |
| GOTERM MF DIRECT | GO:0003705--transcription factor activity, RNA polymerase II distal enhancer seq  | 7     | 1.511879 | 0.006324 | GATA6, JL  | 427        | 66       | 16881     | 4.192996    | 0.985739   | 0.117509  | 9.072244 |
| GOTERM MF DIRECT | GO:0000977--RNA polymerase II regulatory region sequence-specific DNA bindi       | 13    | 2.807775 | 0.006694 | RARG, KL   | 427        | 208      | 16881     | 2.470872    | 0.988889   | 0.120646  | 5.977818 |
| GOTERM MF DIRECT | GO:0005200--structural constituent of cytoskeleton                                | 9     | 1.943844 | 0.006725 | YEATS5, I  | 427        | 110      | 16881     | 3.234597    | 0.989123   | 0.110291  | 9.621759 |
| GOTERM MF DIRECT | GO:0001190--transcriptional activator activity, RNA polymerase II transcription f | 4     | 0.863931 | 0.006997 | NOTCH1, I  | 427        | 16       | 16881     | 9.883489    | 0.990945   | 0.119397  | 9.991808 |
| GOTERM MF DIRECT | GO:0001077--transcriptional activator activity, RNA polymerase II core promoter   | 14    | 3.023758 | 0.007112 | TFAM, ZN   | 427        | 236      | 16881     | 2.345235    | 0.99162    | 0.118243  | 10.14748 |
| GOTERM MF DIRECT | GO:0046982--protein heterodimerization activity                                   | 22    | 4.75162  | 0.007527 | EGFR, CE   | 427        | 465      | 16881     | 1.870424    | 0.993849   | 0.122379  | 10.76705 |
| GOTERM MF DIRECT | GO:0004842--ubiquitin-protein transferase activity                                | 17    | 3.671706 | 0.009638 | IPP, XIAP  | 427        | 329      | 16881     | 2.042788    | 0.998479   | 0.149742  | 13.51435 |
| GOTERM MF DIRECT | GO:0070064--proline-rich region binding                                           | 4     | 0.863931 | 0.011449 | PEN1, CY1  | 427        | 19       | 16881     | 8.322938    | 0.999554   | 0.171529  | 15.85565 |
| GOTERM MF DIRECT | GO:0019900--kinase binding                                                        | 7     | 1.511879 | 0.01161  | LDHA, TL   | 427        | 75       | 16881     | 3.689836    | 0.9996     | 0.16997   | 16.06098 |
| GOTERM MF DIRECT | GO:0000979--RNA polymerase II core promoter sequence-specific DNA binding         | 6     | 1.295896 | 0.014287 | SUZ12, EP  | 427        | 57       | 16881     | 4.161469    | 0.999935   | 0.200859  | 19.4054  |
| GOTERM MF DIRECT | GO:0004714--transmembrane receptor protein tyrosine kinase activity               | 5     | 1.079914 | 0.014998 | EGFR, IGI  | 427        | 38       | 16881     | 5.201837    | 0.99996    | 0.205555  | 20.2728  |
| GOTERM MF DIRECT | GO:0070412--R-SMAD binding                                                        | 4     | 0.863931 | 0.015141 | JUN, SMA   | 427        | 21       | 16881     | 7.530278    | 0.999964   | 0.203209  | 20.44632 |
| GOTERM MF DIRECT | GO:0001227--transcriptional repressor activity, RNA polymerase II transcription : | 6     | 1.295896 | 0.016403 | KLF12, MI  | 427        | 59       | 16881     | 4.020402    | 0.999985   | 0.214072  | 21.96019 |
| GOTERM MF DIRECT | GO:0000981--RNA polymerase II transcription factor activity, sequence-specific I  | 29    | 6.263499 | 0.01863  | NRBP1, C   | 427        | 730      | 16881     | 1.570527    | 0.999997   | 0.23515   | 24.56757 |
| GOTERM MF DIRECT | GO:0000982--transcription factor activity, RNA polymerase II core promoter pro    | 4     | 0.863931 | 0.019429 | SP1, ETS1  | 427        | 23       | 16881     | 6.875471    | 0.999998   | 0.239563  | 25.48319 |
| GOTERM MF DIRECT | GO:0050839--cell adhesion molecule binding                                        | 6     | 1.295896 | 0.019951 | VCAM1, P   | 427        | 62       | 16881     | 3.825867    | 0.999999   | 0.240847  | 26.07555 |
| GOTERM MF DIRECT | GO:0046934--phosphatidylinositol-4,5-bisphosphate 3-kinase activity               | 6     | 1.295896 | 0.019951 | EGFR, GR   | 427        | 62       | 16881     | 3.825867    | 0.999999   | 0.240847  | 26.07555 |
| GOTERM MF DIRECT | GO:0001047--core promoter binding                                                 | 6     | 1.295896 | 0.022575 | NOTCH1, I  | 427        | 64       | 16881     | 3.706309    | 1.0        | 0.263591  | 28.98826 |
| GOTERM MF DIRECT | GO:0030971--receptor tyrosine kinase binding                                      | 5     | 1.079914 | 0.022738 | PITPNM3, A | 427        | 43       | 16881     | 4.596972    | 1.0        | 0.260786  | 29.16613 |
| GOTERM MF DIRECT | GO:0016303--1-phosphatidylinositol-3-kinase activity                              | 5     | 1.079914 | 0.022738 | GRB2, PIK  | 427        | 43       | 16881     | 4.596972    | 1.0        | 0.260786  | 29.16613 |
| GOTERM MF DIRECT | GO:0000774--adenyl-nucleotide exchange factor activity                            | 3     | 0.647948 | 0.025003 | SHN1, BA   | 427        | 10       | 16881     | 11.86019    | 1.0        | 0.278379  | 31.58795 |
| GOTERM MF DIRECT | GO:0005068--transmembrane receptor protein tyrosine kinase adaptor activity       | 3     | 0.647948 | 0.025003 | SHC1, IRS  | 427        | 10       | 16881     | 11.86019    | 1.0        | 0.278379  | 31.58795 |
| GOTERM MF DIRECT | GO:0001223--transcription coactivator binding                                     | 3     | 0.647948 | 0.025003 | CCNT2, TI  | 427        | 10       | 16881     | 11.86019    | 1.0        | 0.278379  | 31.58795 |
| GOTERM MF DIRECT | GO:0000981--RNA polymerase II transcription factor activity, sequence-specific I  | 10    | 2.159827 | 0.029724 | FOXA2, E   | 427        | 171      | 16881     | 2.311927    | 1.0        | 0.317136  | 36.38947 |
| GOTERM MF DIRECT | GO:0001103--RNA polymerase II repressing transcription factor binding             | 4     | 0.863931 | 0.029806 | SP1, GAT   | 427        | 27       | 16881     | 5.856883    | 1.0        | 0.313015  | 36.46996 |
| GOTERM MF DIRECT | GO:0070411--I-SMAD binding                                                        | 3     | 0.647948 | 0.030057 | SMAD4, S   | 427        | 11       | 16881     | 10.78199    | 1.0        | 0.31048   | 36.71514 |
| GOTERM MF DIRECT | GO:0017124--SH3 domain binding                                                    | 8     | 1.727862 | 0.031222 | GRB2, AB   | 427        | 119      | 16881     | 2.657745    | 1.0        | 0.315796  | 37.84524 |
| GOTERM MF DIRECT | GO:0070410--co-SMAD binding                                                       | 3     | 0.647948 | 0.035475 | GATA4, SI  | 427        | 12       | 16881     | 9.883489    | 1.0        | 0.345947  | 41.81345 |
| GOTERM MF DIRECT | GO:0004672--protein kinase activity                                               | 16    | 3.455724 | 0.039573 | EGFR, NR   | 427        | 359      | 16881     | 1.761959    | 1.0        | 0.372761  | 45.41133 |
| GOTERM MF DIRECT | GO:0005154--epidermal growth factor receptor binding                              | 4     | 0.863931 | 0.042565 | GRB2, BT   | 427        | 31       | 16881     | 5.101156    | 1.0        | 0.38979   | 47.90597 |
| GOTERM MF DIRECT | GO:0002020--protease binding                                                      | 7     | 1.511879 | 0.042667 | TNFRSF10   | 427        | 101      | 16881     | 2.739977    | 1.0        | 0.385481  | 47.98948 |
| GOTERM MF DIRECT | GO:0032794--GTPase activating protein binding                                     | 3     | 0.647948 | 0.047324 | TUBB, FM   | 427        | 14       | 16881     | 8.471562    | 1.0        | 0.412861  | 51.65619 |
| GOTERM MF DIRECT | GO:0005524--ATP binding                                                           | 49    | 10.58315 | 0.049492 | NRBP1, PI  | 427        | 1495     | 16881     | 1.295762    | 1.0        | 0.422193  | 53.27897 |
| GOTERM MF DIRECT | GO:0051718--DNA (cytosine-5--methyltransferase activity, acting on CpG subst      | 2     | 0.431965 | 0.049836 | DNMT3A, A  | 427        | 2        | 16881     | 39.53396    | 1.0        | 0.41938   | 53.51188 |
| GOTERM MF DIRECT | GO:0005178--integrin binding                                                      | 7     | 1.511879 | 0.049917 | VCAM1, E   | 427        | 105      | 16881     | 2.635597    | 1.0        | 0.41495   | 53.59121 |
| GOTERM MF DIRECT | GO:0004713--protein tyrosine kinase activity                                      | 8     | 1.727862 | 0.051733 | EGFR, IGI  | 427        | 133      | 16881     | 2.377982    | 1.0        | 0.421626  | 54.90367 |
| GOTERM MF DIRECT | GO:0008083--growth factor activity                                                | 9     | 1.943844 | 0.053323 | BDNF, FG   | 427        | 162      | 16881     | 2.196331    | 1.0        | 0.42666   | 56.02425 |
| GOTERM MF DIRECT | GO:0005159--insulin-like growth factor receptor binding                           | 3     | 0.647948 | 0.053714 | IGF2, SHC  | 427        | 15       | 16881     | 7.906792    | 1.0        | 0.424262  | 56.29564 |
| GOTERM MF DIRECT | GO:0004674--protein serine/threonine kinase activity                              | 16    | 3.455724 | 0.054851 | CCNT2, N   | 427        | 376      | 16881     | 1.682296    | 1.0        | 0.424603  | 57.07624 |
| GOTERM MF DIRECT | GO:0004722--protein serine/threonine phosphatase activity                         | 5     | 1.079914 | 0.058463 | CDC1       |            |          |           |             |            |           |          |
